# Supplementary material for: A persistent behavioral state enables sustained predation of humans by mosquitoes
Source: eLife. 2022 May 12;11:e76663. doi: 10.7554/eLife.76663 (PMC9154740; doi:10.7554/eLife.76663)
Supplement: Figure 1—source data 1. [file elife-76663-fig1-data1.xlsx]

## Sheet: Figure 1I
Figure 1I
Gr3		CsChrimson		Gr3>CsChrimson
Pre	Post	Pre	Post	Pre	Post
0.390382	0.432831	0.154568	0.141416	0.310592	1.83619
0.199798	0.257707	0.334556	0.313705	0.125482	1.16664
0.347707	0.453536	0.189519	0.325109	0.350627	0.414504
0.0595917	0.0708614	0.105296	0.155714	0.129348	1.59584
0.319854	0.351986	0.353423	0.250946	0.0941009	0.98711
0.286255	0.332469	0.492811	0.559896	0.403928	1.24795
0.270547	0.242871	0.0779099	0.080977	0.0823228	0.926893
0.224661	0.258021	0.0640185	0.0782358	0.195229	1.10624
0.253474	0.579144	0.0381449	0.0446906	0.0806358	2.32992
0.341555	0.362253	0.0469527	0.0572589	0.14382	0.438908
1.88893	1.69108	0.0802702	0.140969	0.117921	1.04589
0.605927	0.628041	0.304001	0.163919	0.0694418	0.158476
0.037767	0.0391436	0.182432	0.0982164	0.362123	1.26167
1.41942	1.557	0.226612	0.246117	0.410185	0.952994
0.564532	0.540402	0.164136	0.157441	0.163721	0.409498
0.0493096	0.0496328	0.199305	0.134698	0.221725	0.163132
0.0776728	0.296723	0.268578	0.403221	0.125281	0.221998
0.190838	0.0952715	0.5433	0.304981	0.213591	0.420264
0.161989	0.147537	0.0627228	0.234747	0.278617	0.993217
0.443189	0.473656	0.059176	0.4267	0.416834	1.4713
0.261963	0.22799	0.418403	0.229601	0.327917	0.687331
0.307581	0.12732	0.28631	0.257643	0.28614	0.963014
0.524097	0.606851	0.278947	0.242406	0.0633512	1.30606
0.303213	0.201484	0.113035	0.139594	0.12312	1.44062
0.365745	0.243967	0.205503	0.172337	0.0307612	0.0297577
0.0484713	0.0625756	0.041558	0.0543843	0.0401869	0.12371
0.278125	0.29204	0.073074	0.186479	0.0876595	0.375955
0.413718	0.388565	0.108587	0.0813999	0.204278	0.31722
0.182346	0.178887	0.348878	0.253169	0.113344	0.22234
0.552505	0.390175	0.440242	0.352912	0.398157	0.872922
0.0616216	0.0615521	0.0403996	0.0676429	0.234861	1.3182
0.505203	0.349148	0.234483	0.25576	0.209391	0.892157
0.238565	0.230624	0.0911244	0.0774205	0.102263	0.257488
0.106944	0.113031	0.265591	0.614775	0.172184	0.618566
0.498217	0.524115	0.256648	0.225966	0.0787102	0.472047
0.141069	0.139939	0.072925	0.269976	0.299806	0.18854
0.120155	0.148357	0.104985	0.107313	0.201729	0.373751
0.489851	0.507696	0.267149	0.573224	0.620298	0.988641
0.0689313	0.0952347	0.048265	0.0754042	0.280974	1.61486
0.0713977	0.0751032	0.255801	0.205414	0.185683	0.516605
0.146785	0.153302	0.129971	0.0961671	0.145336	0.27217
0.257152	0.249953	0.0522276	0.0801805	0.139351	0.810568
0.434651	0.435004	0.17966	0.245882	0.518855	0.984446
0.693421	0.754237	0.107203	0.243507	0.0649291	0.506446
0.340797	0.379715	0.0337274	0.0375287	0.0693564	1.64332
0.478145	0.523019	0.161801	0.278484	0.675654	2.34967
0.146377	0.146149	0.28389	0.135553	0.101866	0.559411
0.243672	0.111139	0.0333001	0.0385045	0.0763215	0.721307
0.0482199	0.0326842	0.234431	0.61994	0.293811	0.260351
0.26635	0.222073	0.217026	0.210467	0.308999	1.11836
0.0629509	0.0660878	0.0791321	0.0695688	0.057649	0.658427
0.146582	0.19663	0.240554	0.156368	0.393765	0.919464
0.101716	0.135536	0.237193	0.241142	0.21339	0.812442
0.205518	0.240976	0.228467	0.122729	0.30297	2.07775
0.139799	0.163961	0.185068	0.161459	0.167069	2.37297
0.304375	0.267201	0.0221495	0.404733	0.130528	0.495745
0.576826	0.42066	0.238231	0.201631	0.507349	0.290681
0.410539	0.393416	0.197471	0.275188	0.166568	0.418333
0.122054	0.10726	0.0646154	0.0542312	0.627193	0.0940176
0.166442	0.117098	0.0919418	0.214632	0.135409	0.414113
0.107137	0.0914579	0.0699852	0.148267	0.0460727	0.310452
0.0949708	0.123707	0.0368023	0.0970288	0.178703	0.869878
0.244273	0.154503	0.0697568	0.144231	0.461585	0.705961
0.149981	0.98556	0.0715333	0.642244	0.0358941	0.840316
0.393896	0.413305	0.0371812	0.0594048	0.0874293	0.663069
0.637414	0.664313	0.0503322	0.223925	0.392624	0.623258
0.437844	0.175232	0.0474058	0.36403	0.232249	0.444599
0.129007	0.133613	0.0485786	0.0529049	0.043515	0.426092
0.14392	0.170971	0.10236	0.0616303	0.0687834	0.733926
0.321415	0.352184	0.138479	0.113055	0.265575	0.872961

## Sheet: Figure 1L
Figure 1L
Time (minutes)	0	0.25	0.5	0.75	1	1.25	1.5	1.75	2	2.25	2.5	2.75	3	3.25	3.5	3.75	4	4.25	4.5	4.75	5	5.25	5.5	5.75	6	6.25	6.5	6.75	7	7.25	7.5	7.75	8	8.25	8.5	8.75	9	9.25	9.5	9.75	10	10.25	10.5	10.75	11	11.25	11.5	11.75	12
Gr3>CsChrimson_light	0.2	0.15	0.15	0.2	0.15	0.15	0.15	0.15	0.3	0.3	0.4	0.4	0.45	0.4	0.3	0.35	0.4	0.25	0.3	0.3	0.25	0.3	0.3	0.3	0.3	0.3	0.35	0.35	0.35	0.35	0.3	0.35	0.35	0.35	0.35	0.4	0.35	0.4	0.25	0.25	0.25	0.25	0.25	0.25	0.25	0.25	0.25	0.25	0.25
Gr3>CsChrimson_none	0.05	0	0	0	0	0	0	0	0	0	0	0	0	0	0	0	0	0	0	0	0	0	0	0	0	0	0	0	0	0	0	0	0	0	0	0	0	0	0	0	0	0	0	0	0	0	0	0	0
Gr3>CsChrimson_CO2	0.1	0.1	0.1	0.1	0.05	0.15	0.1	0.3	0.35	0.25	0.25	0.25	0.25	0.25	0.25	0.25	0.25	0.25	0.25	0.3	0.3	0.3	0.25	0.25	0.25	0.25	0.25	0.25	0.25	0.25	0.25	0.25	0.25	0.3	0.3	0.3	0.3	0.3	0.3	0.3	0.3	0.2	0.25	0.25	0.25	0.25	0.25	0.25	0.25
CsChrimson_light	0	0	0	0	0	0	0	0	0	0	0	0	0	0	0	0	0	0	0	0	0	0	0	0	0	0	0	0	0	0	0	0	0	0.05	0.05	0.05	0.05	0.05	0.05	0.05	0.05	0.05	0.05	0.05	0.05	0.05	0.05	0.05	0.05
CsChrimson_none	0.05	0.05	0.05	0.05	0.05	0.05	0.05	0.05	0.05	0.05	0.05	0.05	0.05	0.05	0.05	0.05	0.05	0.05	0.05	0.05	0.05	0.05	0.05	0.05	0.05	0.05	0.05	0.05	0.05	0.05	0.05	0.05	0.05	0.05	0.05	0.05	0.05	0.05	0.05	0.05	0.05	0.05	0.05	0.05	0.05	0.05	0.05	0.05	0.05
CsChrimson_CO2	0	0	0	0.1	0.2	0.25	0.25	0.35	0.35	0.35	0.4	0.4	0.4	0.35	0.4	0.45	0.45	0.4	0.45	0.45	0.45	0.45	0.45	0.45	0.45	0.45	0.4	0.4	0.4	0.4	0.4	0.25	0.25	0.25	0.25	0.25	0.25	0.25	0.25	0.25	0.25	0.25	0.2	0.2	0.2	0.2	0.2	0.2	0.2
Gr3_light	0.05	0.1	0.15	0.15	0.15	0.15	0.15	0.15	0.2	0.2	0.2	0.2	0.15	0.15	0.15	0.15	0.15	0.15	0.15	0.15	0.15	0.15	0.15	0.15	0.15	0.15	0.15	0.15	0.15	0.15	0.15	0.15	0.15	0.15	0.15	0.15	0.15	0.15	0.15	0.15	0.15	0.15	0.15	0.15	0.2	0.2	0.2	0.2	0.2
Gr3_none	0.05	0.05	0.05	0	0	0	0	0	0	0	0	0	0	0	0	0	0	0	0	0	0	0	0	0	0	0	0	0	0	0	0	0	0	0	0	0	0	0	0	0	0	0	0	0	0	0	0	0	0
Gr3_CO2	0.1	0.05	0.05	0.05	0.05	0.1	0.1	0.1	0.15	0.2	0.15	0.15	0.2	0.3	0.2	0.2	0.25	0.3	0.25	0.25	0.2	0.15	0.2	0.2	0.2	0.2	0.2	0.2	0.15	0.15	0.15	0.15	0.1	0.1	0.1	0.15	0.15	0.15	0.15	0.2	0.2	0.2	0.2	0.2	0.2	0.2	0.2	0.2	0.2
Gr3_light	0.210526	0.157895	0.210526	0.210526	0.210526	0.210526	0.210526	0.210526	0.210526	0.210526	0.210526	0.210526	0.210526	0.210526	0.157895	0.157895	0.105263	0.105263	0.105263	0.105263	0.105263	0.105263	0.105263	0.105263	0.105263	0.105263	0.105263	0.105263	0.105263	0.105263	0.105263	0.105263	0.105263	0.105263	0.105263	0.105263	0.105263	0.105263	0.105263	0.105263	0.105263	0.105263	0.105263	0.105263	0.105263	0.105263	0.0526316	0.105263	0.105263
Gr3_none	0.15	0.15	0.15	0.15	0.2	0.2	0.15	0.15	0.15	0.15	0.15	0.15	0.15	0.15	0.15	0.15	0.15	0.15	0.15	0.15	0.15	0.15	0.15	0.15	0.15	0.1	0.1	0.1	0.1	0.15	0.15	0.15	0.15	0.15	0.15	0.15	0.15	0.2	0.2	0.2	0.2	0.2	0.2	0.2	0.15	0.15	0.15	0.15	0.15
Gr3_CO2	0.1	0.15	0.2	0.1	0.15	0.2	0.2	0.2	0.2	0.25	0.3	0.3	0.25	0.25	0.3	0.3	0.3	0.3	0.3	0.3	0.3	0.4	0.3	0.3	0.3	0.3	0.3	0.3	0.3	0.3	0.3	0.25	0.25	0.25	0.25	0.25	0.25	0.25	0.25	0.25	0.25	0.25	0.25	0.2	0.2	0.2	0.2	0.2	0.2
Gr3>CsChrimson_light	0.1	0	0.05	0.2	0.2	0.2	0.25	0.25	0.3	0.35	0.35	0.35	0.3	0.3	0.3	0.3	0.25	0.25	0.25	0.25	0.3	0.3	0.25	0.25	0.25	0.2	0.2	0.15	0.15	0.15	0.15	0.15	0.15	0.1	0.05	0.05	0.05	0.1	0.15	0.15	0.15	0.2	0.2	0.2	0.2	0.2	0.2	0.2	0.2
Gr3>CsChrimson_none	0.111111	0.0555556	0	0	0	0	0	0	0	0.0555556	0.0555556	0.0555556	0.0555556	0.0555556	0.111111	0.0555556	0.0555556	0.0555556	0.0555556	0.0555556	0.0555556	0.0555556	0.0555556	0.0555556	0.111111	0.111111	0.111111	0.111111	0.111111	0.0555556	0.0555556	0.0555556	0.0555556	0.111111	0.111111	0.111111	0.111111	0.111111	0.166667	0.111111	0.111111	0.111111	0.111111	0.166667	0.166667	0.166667	0.166667	0.166667	0.166667
Gr3>CsChrimson_CO2	0.2	0.2	0.3	0.45	0.35	0.45	0.35	0.45	0.4	0.45	0.5	0.4	0.35	0.45	0.45	0.45	0.45	0.45	0.45	0.45	0.45	0.45	0.4	0.5	0.55	0.55	0.55	0.55	0.6	0.6	0.6	0.45	0.5	0.55	0.55	0.55	0.6	0.55	0.55	0.55	0.55	0.55	0.55	0.55	0.5	0.5	0.5	0.5	0.5
CsChrimson_light	0	0	0	0	0	0	0	0	0	0	0	0	0	0	0	0	0	0	0	0	0	0	0	0	0	0	0	0	0	0	0	0	0	0	0	0	0	0	0	0	0	0	0	0	0	0	0	0	0
CsChrimson_none	0	0	0	0	0	0	0	0	0	0	0	0	0	0	0	0	0	0	0	0	0	0	0	0	0	0	0	0	0	0	0	0	0	0	0	0	0	0	0	0	0	0	0	0	0	0	0	0	0
CsChrimson_CO2	0.1	0.1	0.05	0.15	0.2	0.25	0.25	0.3	0.3	0.3	0.3	0.35	0.4	0.4	0.4	0.4	0.4	0.4	0.4	0.4	0.3	0.35	0.35	0.35	0.35	0.35	0.3	0.3	0.3	0.3	0.25	0.25	0.25	0.25	0.25	0.2	0.25	0.25	0.25	0.25	0.25	0.25	0.2	0.25	0.25	0.25	0.25	0.2	0.2
CsChrimson_light	0.1	0.1	0.05	0.05	0.05	0.05	0.05	0.05	0.05	0.05	0.05	0.05	0.05	0.05	0.05	0.05	0.05	0.05	0.05	0.05	0.05	0.05	0.05	0.05	0.05	0.05	0.05	0.05	0.05	0.05	0.05	0.05	0.05	0.05	0.05	0.05	0.05	0.05	0.05	0.05	0.05	0.05	0.05	0.05	0.05	0.05	0.05	0.05	0.05
CsChrimson_none	0	0	0	0	0	0	0	0	0	0	0	0	0	0	0	0	0	0	0	0	0	0	0	0	0	0	0	0	0	0	0	0	0	0	0	0	0	0	0	0	0	0	0	0	0	0	0	0	0
CsChrimson_CO2	0.1	0.1	0.3	0.35	0.35	0.4	0.4	0.45	0.45	0.45	0.45	0.5	0.5	0.5	0.35	0.35	0.35	0.35	0.35	0.3	0.3	0.3	0.3	0.3	0.3	0.3	0.3	0.3	0.3	0.3	0.35	0.35	0.35	0.35	0.35	0.35	0.35	0.3	0.2	0.25	0.25	0.2	0.2	0.15	0.2	0.2	0.2	0.2	0.15
Gr3_light	0.25	0.2	0.2	0.15	0.15	0.2	0.15	0.15	0.15	0.15	0.15	0.15	0.15	0.2	0.15	0.15	0.25	0.15	0.15	0.25	0.2	0.25	0.2	0.2	0.2	0.2	0.2	0.2	0.2	0.2	0.15	0.15	0.15	0.15	0.15	0.15	0.15	0.15	0.15	0.15	0.15	0.15	0.15	0.15	0.15	0.15	0.15	0.15	0.15
Gr3_none	0.2	0.15	0.15	0.2	0.2	0.2	0.2	0.2	0.2	0.2	0.15	0.15	0.1	0.1	0.1	0.1	0.1	0.1	0.1	0.05	0.05	0.05	0.05	0.05	0.1	0.1	0.1	0.1	0.05	0.1	0.1	0.05	0.1	0.1	0.1	0.1	0.05	0.1	0.1	0.1	0.1	0.15	0.1	0.1	0.15	0.1	0.15	0.15	0.15
Gr3_CO2	0.15	0.1	0.05	0.1	0.25	0.2	0.25	0.25	0.25	0.3	0.3	0.3	0.3	0.3	0.3	0.3	0.2	0.2	0.3	0.3	0.3	0.2	0.2	0.2	0.2	0.2	0.2	0.15	0.15	0.15	0.15	0.15	0.15	0.15	0.15	0.15	0.15	0.15	0.15	0.15	0.15	0.15	0.15	0.15	0.15	0.15	0.15	0.15	0.15
Gr3>CsChrimson_light	0.1	0.1	0.25	0.3	0.35	0.35	0.35	0.35	0.4	0.35	0.4	0.4	0.5	0.5	0.5	0.5	0.5	0.45	0.45	0.45	0.45	0.5	0.5	0.5	0.5	0.5	0.5	0.5	0.5	0.5	0.5	0.5	0.5	0.5	0.45	0.4	0.4	0.4	0.4	0.4	0.4	0.4	0.4	0.4	0.4	0.4	0.4	0.4	0.4
Gr3>CsChrimson_none	0	0	0	0	0	0	0	0	0	0	0	0	0	0	0	0	0	0	0	0	0	0	0	0	0	0	0	0	0.1	0.05	0.05	0.05	0.05	0.05	0.05	0.05	0.05	0.05	0.05	0.05	0.05	0.05	0.05	0.1	0.1	0.1	0.1	0.1	0.1
Gr3>CsChrimson_CO2	0.05	0.05	0.1	0.15	0.25	0.3	0.3	0.3	0.3	0.3	0.3	0.25	0.25	0.25	0.25	0.15	0.1	0.1	0.1	0.1	0.1	0.1	0.05	0.1	0.1	0.05	0.05	0.05	0.05	0.05	0.05	0.05	0.05	0.05	0.05	0.05	0.1	0.1	0.1	0.15	0.15	0.15	0.15	0.15	0.15	0.15	0.15	0.15	0.15
Gr3>CsChrimson_CO2	0.1	0.2	0.2	0.25	0.2	0.25	0.2	0.2	0.3	0.3	0.25	0.25	0.25	0.25	0.25	0.25	0.25	0.25	0.25	0.25	0.25	0.2	0.2	0.25	0.15	0.15	0.15	0.15	0.15	0.15	0.15	0.15	0.15	0.15	0.15	0.2	0.2	0.2	0.2	0.2	0.2	0.15	0.15	0.15	0.15	0.15	0.15	0.15	0.15
Gr3>CsChrimson_none	0.2	0.15	0.15	0.15	0.15	0.15	0.15	0.15	0.15	0.1	0.1	0.1	0.1	0.1	0.1	0.1	0.1	0.1	0.1	0.1	0.1	0.1	0.1	0.1	0.1	0.1	0.1	0.1	0.1	0.1	0.1	0.1	0.1	0.1	0.1	0.1	0.1	0.1	0.1	0.1	0.1	0.1	0.1	0.1	0.1	0.1	0.1	0.1	0.1
Gr3>CsChrimson_light	0.0952381	0.142857	0.047619	0.0952381	0.047619	0.0952381	0.0952381	0.142857	0.238095	0.285714	0.238095	0.238095	0.238095	0.142857	0.047619	0.0952381	0.0952381	0.0952381	0.047619	0.0952381	0.142857	0.0952381	0.142857	0.142857	0.0952381	0.0952381	0.0952381	0.0952381	0.0952381	0.0952381	0.0952381	0.0952381	0.0952381	0.190476	0.190476	0.190476	0.190476	0.190476	0.190476	0.190476	0.190476	0.190476	0.190476	0.190476	0.190476	0.190476	0.190476	0.238095	0.190476
CsChrimson_CO2	0	0	0.05	0.15	0.15	0.25	0.25	0.3	0.3	0.4	0.45	0.45	0.45	0.45	0.45	0.45	0.4	0.4	0.4	0.4	0.4	0.4	0.4	0.4	0.4	0.4	0.45	0.45	0.45	0.4	0.4	0.4	0.4	0.3	0.3	0.2	0.2	0.2	0.2	0.2	0.2	0.2	0.2	0.2	0.2	0.2	0.2	0.25	0.25
CsChrimson_light	0	0	0	0	0	0	0	0	0	0	0	0	0	0	0	0	0	0	0	0	0	0	0	0	0	0	0	0	0	0	0	0	0	0	0	0	0	0	0	0	0	0	0	0	0	0	0	0	0
Gr3_CO2	0.1	0.05	0.15	0.25	0.25	0.35	0.25	0.15	0.25	0.3	0.3	0.3	0.25	0.15	0.25	0.25	0.2	0.25	0.25	0.25	0.25	0.25	0.2	0.2	0.2	0.2	0.25	0.25	0.25	0.25	0.25	0.25	0.25	0.25	0.25	0.25	0.2	0.2	0.2	0.25	0.25	0.25	0.25	0.25	0.25	0.25	0.25	0.25	0.25
Gr3_none	0.3	0.3	0.2	0.2	0.2	0.2	0.2	0.2	0.2	0.15	0.1	0.1	0.1	0.1	0.1	0.1	0.1	0.1	0.1	0.1	0.1	0.1	0.1	0.1	0.1	0.1	0.1	0.1	0.1	0.1	0.1	0.1	0.1	0.1	0.1	0.1	0.1	0.1	0.1	0.1	0.1	0.1	0.1	0.1	0.15	0.15	0.15	0.15	0.15
Gr3_light	0	0	0	0	0	0	0	0	0	0	0	0	0	0	0	0	0	0	0	0	0	0	0	0	0	0	0	0	0	0	0	0	0	0	0	0	0	0	0	0	0	0	0.05	0	0	0	0	0	0
CsChrimson_CO2	0	0	0	0.15	0.2	0.2	0.2	0.15	0.15	0.25	0.25	0.25	0.25	0.3	0.25	0.3	0.3	0.3	0.3	0.25	0.3	0.25	0.2	0.2	0.25	0.25	0.25	0.25	0.25	0.25	0.25	0.25	0.25	0.2	0.2	0.25	0.25	0.25	0.2	0.25	0.2	0.25	0.25	0.25	0.2	0.2	0.25	0.3	0.3
CsChrimson_none	0	0	0	0	0	0	0	0	0	0	0	0	0	0	0	0	0	0	0	0	0	0	0	0	0	0	0	0	0	0	0	0	0	0	0	0	0	0	0	0	0	0	0	0	0	0	0	0	0
CsChrimson_light	0.1	0.05	0.1	0.1	0.1	0.1	0.1	0.1	0.1	0.1	0.1	0.1	0.1	0.1	0.1	0.1	0.1	0.1	0.1	0.1	0.1	0.1	0.1	0.1	0.1	0.1	0.1	0.1	0.1	0.1	0.1	0.1	0.1	0.1	0.1	0.1	0.1	0.1	0.1	0.1	0.1	0.1	0.1	0.1	0.1	0.1	0.1	0.1	0.1
Gr3>CsChrimson_CO2	0.05	0.1	0.05	0.05	0.15	0.25	0.35	0.35	0.35	0.35	0.4	0.4	0.4	0.35	0.35	0.25	0.3	0.25	0.25	0.3	0.3	0.3	0.35	0.35	0.35	0.4	0.35	0.35	0.35	0.4	0.25	0.25	0.3	0.3	0.3	0.3	0.3	0.3	0.3	0.3	0.3	0.3	0.3	0.3	0.3	0.3	0.3	0.3	0.3
Gr3>CsChrimson_none	0.15	0.15	0.15	0.15	0.15	0.15	0.15	0.15	0.15	0.1	0.1	0.1	0.1	0.1	0.1	0.1	0.1	0.15	0.15	0.15	0.15	0.15	0.15	0.15	0.15	0.15	0.15	0.15	0.15	0.15	0.15	0.1	0.1	0.1	0.1	0.1	0.1	0.1	0.1	0.1	0.1	0.1	0.1	0.1	0.1	0.1	0.1	0.1	0.1
Gr3>CsChrimson_light	0.05	0.05	0.05	0.05	0.15	0.05	0.1	0.1	0.1	0.1	0.1	0.1	0.1	0.1	0.15	0.15	0.15	0.15	0.2	0.3	0.3	0.35	0.35	0.35	0.35	0.3	0.3	0.3	0.3	0.35	0.3	0.25	0.25	0.25	0.25	0.25	0.25	0.25	0.3	0.3	0.35	0.35	0.25	0.25	0.25	0.25	0.25	0.25	0.25
Gr3_CO2	0.05	0.05	0.05	0.15	0.25	0.15	0.25	0.1	0.3	0.35	0.35	0.35	0.35	0.35	0.4	0.4	0.45	0.45	0.45	0.4	0.45	0.45	0.45	0.45	0.45	0.4	0.35	0.35	0.35	0.35	0.35	0.35	0.35	0.35	0.35	0.35	0.35	0.35	0.35	0.35	0.35	0.35	0.35	0.35	0.35	0.35	0.35	0.35	0.35
Gr3_none	0.05	0	0	0	0	0	0	0	0	0	0	0	0	0	0	0	0	0	0	0	0	0	0	0	0	0	0	0	0	0	0	0	0	0.05	0.05	0.05	0.05	0.05	0.05	0.05	0.05	0.05	0.05	0.05	0.05	0.05	0.05	0.05	0.05
Gr3_light	0	0	0	0	0.05	0	0	0	0	0	0	0	0	0	0	0	0	0	0	0	0	0	0	0	0	0	0	0	0	0	0	0	0	0	0	0	0	0	0	0	0	0	0	0	0	0	0	0	0
Gr3_CO2	0.1	0.2	0.1	0.1	0.1	0.1	0.1	0.05	0.05	0.05	0.05	0.05	0.15	0.15	0.15	0.05	0.05	0.05	0.05	0.1	0.1	0.1	0.15	0.1	0.1	0.1	0.1	0.1	0.1	0.1	0.15	0.15	0.15	0.15	0.1	0.15	0.1	0.2	0.2	0.2	0.2	0.2	0.2	0.2	0.25	0.25	0.2	0.15	0.15
Gr3_none	0.2	0.25	0.25	0.3	0.3	0.3	0.25	0.25	0.25	0.25	0.25	0.25	0.25	0.2	0.2	0.2	0.2	0.2	0.2	0.2	0.2	0.2	0.2	0.2	0.2	0.2	0.2	0.2	0.2	0.2	0.2	0.2	0.2	0.2	0.15	0.15	0.15	0.1	0.1	0.1	0.1	0.1	0.1	0.1	0.1	0.1	0.1	0.1	0.1
Gr3_light	0.05	0.05	0.05	0.1	0.1	0.15	0.15	0.1	0.15	0.2	0.2	0.2	0.2	0.2	0.15	0.15	0.15	0.15	0.15	0.15	0.15	0.15	0.15	0.15	0.15	0.05	0.05	0.05	0.05	0.05	0.05	0.05	0.05	0.05	0.05	0.05	0.05	0.05	0.05	0.05	0.05	0.05	0.05	0.05	0.05	0.05	0.05	0.05	0.05
CsChrimson_CO2	0	0	0.05	0.1	0.15	0.15	0.15	0.15	0.15	0.2	0.2	0.2	0.2	0.2	0.2	0.2	0.2	0.2	0.2	0.2	0.2	0.2	0.2	0.2	0.2	0.2	0.2	0.2	0.2	0.2	0.2	0.2	0.2	0.2	0.2	0.2	0.2	0.25	0.25	0.25	0.25	0.2	0.2	0.2	0.2	0.2	0.2	0.2	0.2
CsChrimson_none	0	0	0	0	0	0	0	0	0	0	0	0.05	0.05	0.05	0.05	0.05	0.05	0.05	0.05	0.05	0.05	0.05	0.05	0.05	0.05	0.05	0.05	0.05	0.05	0.05	0.05	0.05	0.05	0.05	0.05	0.05	0.05	0.05	0.05	0.05	0.05	0.05	0.05	0.05	0.05	0.05	0.05	0.05	0.05
CsChrimson_light	0	0	0	0	0	0	0	0	0	0	0	0	0	0	0	0	0	0	0	0	0	0	0	0	0	0	0	0	0	0	0	0	0	0	0	0	0	0	0	0	0	0	0	0	0	0	0	0	0
Gr3>CsChrimson_CO2	0.15	0.15	0.25	0.3	0.3	0.3	0.35	0.35	0.4	0.35	0.3	0.35	0.35	0.35	0.3	0.35	0.35	0.35	0.35	0.35	0.35	0.3	0.3	0.3	0.3	0.3	0.3	0.3	0.3	0.3	0.3	0.3	0.3	0.3	0.3	0.3	0.3	0.3	0.4	0.35	0.35	0.35	0.35	0.35	0.2	0.2	0.2	0.2	0.2
Gr3>CsChrimson_none	0.05	0.05	0.05	0.05	0.05	0.1	0.1	0.1	0.1	0.1	0.05	0.1	0.1	0.1	0.1	0.1	0.1	0.1	0.1	0.05	0.05	0.05	0	0	0	0	0	0	0	0	0	0	0	0	0	0	0	0	0	0	0	0	0	0	0	0	0	0	0
Gr3>CsChrimson_light	0.0526316	0.0526316	0.105263	0.157895	0.210526	0.157895	0.210526	0.157895	0.210526	0.263158	0.263158	0.368421	0.368421	0.421053	0.315789	0.473684	0.473684	0.315789	0.368421	0.421053	0.368421	0.421053	0.315789	0.368421	0.421053	0.421053	0.368421	0.368421	0.421053	0.421053	0.421053	0.368421	0.368421	0.368421	0.368421	0.368421	0.368421	0.263158	0.315789	0.315789	0.315789	0.315789	0.315789	0.315789	0.315789	0.315789	0.315789	0.315789	0.315789
Gr3>CsChrimson_CO2	0	0	0.0526316	0.105263	0.157895	0.105263	0.157895	0.210526	0.210526	0.210526	0.210526	0.157895	0.157895	0.210526	0.157895	0.157895	0.263158	0.263158	0.315789	0.263158	0.315789	0.263158	0.263158	0.315789	0.210526	0.210526	0.210526	0.263158	0.263158	0.263158	0.263158	0.263158	0.263158	0.263158	0.263158	0.263158	0.263158	0.263158	0.263158	0.263158	0.263158	0.263158	0.210526	0.210526	0.210526	0.210526	0.210526	0.210526	0.210526
Gr3>CsChrimson_none	0.285714	0.238095	0.190476	0.190476	0.190476	0.190476	0.238095	0.238095	0.190476	0.190476	0.190476	0.190476	0.190476	0.190476	0.142857	0.0952381	0.0952381	0.142857	0.0952381	0.142857	0.142857	0.142857	0.142857	0.0952381	0.0952381	0.0952381	0.0952381	0.0952381	0.0952381	0.0952381	0.0952381	0.0952381	0.0952381	0.0952381	0.0952381	0.0952381	0.0952381	0.0952381	0.0952381	0.0952381	0.0952381	0.0952381	0.0952381	0.0952381	0.0952381	0.0952381	0.0952381	0.0952381	0.0952381
Gr3>CsChrimson_light	0.105263	0.210526	0.315789	0.421053	0.368421	0.315789	0.315789	0.315789	0.421053	0.421053	0.473684	0.473684	0.473684	0.473684	0.473684	0.473684	0.473684	0.473684	0.473684	0.473684	0.473684	0.473684	0.473684	0.526316	0.526316	0.526316	0.526316	0.526316	0.578947	0.578947	0.578947	0.526316	0.526316	0.526316	0.526316	0.526316	0.526316	0.421053	0.473684	0.473684	0.473684	0.473684	0.473684	0.421053	0.421053	0.421053	0.421053	0.421053	0.421053
Gr3_CO2	0	0	0.15	0.1	0.2	0.2	0.3	0.3	0.25	0.25	0.3	0.35	0.3	0.3	0.3	0.3	0.3	0.3	0.3	0.3	0.3	0.25	0.15	0.15	0.2	0.25	0.25	0.25	0.25	0.25	0.25	0.25	0.25	0.2	0.2	0.2	0.2	0.2	0.2	0.2	0.2	0.2	0.2	0.2	0.2	0.2	0.2	0.2	0.2
Gr3_none	0.2	0.15	0.05	0.05	0.05	0.05	0.1	0.05	0.05	0.05	0.05	0.05	0.05	0.1	0.1	0.1	0.1	0.1	0.1	0.1	0.1	0.1	0.1	0.1	0.1	0.1	0.1	0.1	0.1	0.1	0.1	0.1	0.1	0.1	0.1	0.1	0.1	0.1	0.1	0.1	0.1	0.1	0.1	0.1	0.1	0.1	0.1	0.1	0.1
Gr3_light	0	0	0	0.05	0.1	0.05	0	0.05	0.05	0.05	0.05	0.05	0	0	0	0	0	0	0	0	0	0	0	0	0	0	0	0	0	0	0	0	0	0	0	0	0	0	0	0	0	0	0	0	0	0	0	0	0
CsChrimson_CO2	0.1	0.1	0.1	0.2	0.25	0.25	0.25	0.2	0.2	0.25	0.25	0.3	0.3	0.3	0.3	0.3	0.3	0.3	0.3	0.3	0.3	0.3	0.3	0.3	0.3	0.3	0.3	0.3	0.25	0.25	0.25	0.25	0.25	0.25	0.25	0.25	0.25	0.25	0.25	0.25	0.25	0.25	0.25	0.25	0.25	0.25	0.25	0.25	0.25
CsChrimson_none	0	0	0	0	0	0	0	0	0	0	0	0	0	0	0	0	0	0	0	0	0	0	0	0	0	0	0	0	0	0	0	0	0	0	0	0	0	0	0	0	0	0	0	0	0	0	0	0	0
CsChrimson_light	0	0	0	0	0	0	0	0	0	0	0	0	0	0	0	0	0	0	0	0	0	0	0	0	0	0	0	0	0	0	0	0	0	0	0	0	0	0	0	0	0	0	0	0	0	0	0	0	0
[truncated: 12 more columns]

## Sheet: Figure 1M
day	genotype	condition	stimulus	name	fed	unfed	total	prop fed
1	Gr3>CsChrimson	ATR	light	Gr3>CsChrimson_light	9	11	20	0.45
1	Gr3>CsChrimson	ATR	none	Gr3>CsChrimson_none	0	20	20	0
1	Gr3>CsChrimson	ATR	CO2	Gr3>CsChrimson_CO2	8	12	20	0.4
1	CsChrimson/+	ATR	light	CsChrimson_light	1	19	20	0.05
1	CsChrimson/+	ATR	none	CsChrimson_none	0	20	20	0
1	CsChrimson/+	ATR	CO2	CsChrimson_CO2	10	10	20	0.5
1	Gr3/+	ATR	light	Gr3_light	2	18	20	0.1
1	Gr3/+	ATR	none	Gr3_none	0	20	20	0
1	Gr3/+	ATR	CO2	Gr3_CO2	4	16	20	0.2
2	Gr3/+	ATR	light	Gr3_light	0	19	19	0
2	Gr3/+	ATR	none	Gr3_none	2	18	20	0.1
2	Gr3/+	ATR	CO2	Gr3_CO2	6	14	20	0.3
2	Gr3>CsChrimson	ATR	light	Gr3>CsChrimson_light	10	10	20	0.5
2	Gr3>CsChrimson	ATR	none	Gr3>CsChrimson_none	2	16	18	0.111111
2	Gr3>CsChrimson	ATR	CO2	Gr3>CsChrimson_CO2	12	8	20	0.6
2	CsChrimson/+	ATR	light	CsChrimson_light	0	20	20	0
2	CsChrimson/+	ATR	none	CsChrimson_none	0	20	20	0
2	CsChrimson/+	ATR	CO2	CsChrimson_CO2	8	12	20	0.4
3	CsChrimson/+	ATR	light	CsChrimson_light	0	20	20	0
Figure 1M
3	CsChrimson/+	ATR	none	CsChrimson_none	0	20	20	0
3	CsChrimson/+	ATR	CO2	CsChrimson_CO2	9	11	20	0.45
3	Gr3/+	ATR	light	Gr3_light	3	17	20	0.15
3	Gr3/+	ATR	none	Gr3_none	1	19	20	0.05
3	Gr3/+	ATR	CO2	Gr3_CO2	6	14	20	0.3
3	Gr3>CsChrimson	ATR	light	Gr3>CsChrimson_light	12	8	20	0.6
3	Gr3>CsChrimson	ATR	none	Gr3>CsChrimson_none	0	20	20	0
3	Gr3>CsChrimson	ATR	CO2	Gr3>CsChrimson_CO2	6	14	20	0.3
4	Gr3>CsChrimson	ATR	CO2	Gr3>CsChrimson_CO2	4	16	20	0.2
4	Gr3>CsChrimson	ATR	none	Gr3>CsChrimson_none	0	20	20	0
4	Gr3>CsChrimson	ATR	light	Gr3>CsChrimson_light	6	15	21	0.285714
4	CsChrimson/+	ATR	CO2	CsChrimson_CO2	11	9	20	0.55
4	CsChrimson/+	ATR	none	CsChrimson_none	0	20	20	0
4	CsChrimson/+	ATR	light	CsChrimson_light	0	20	20	0
4	Gr3/+	ATR	CO2	Gr3_CO2	8	12	20	0.4
4	Gr3/+	ATR	none	Gr3_none	2	18	20	0.1
4	Gr3/+	ATR	light	Gr3_light	1	19	20	0.05
5	CsChrimson/+	ATR	CO2	CsChrimson_CO2	6	14	20	0.3
5	CsChrimson/+	ATR	none	CsChrimson_none	0	20	20	0
5	CsChrimson/+	ATR	light	CsChrimson_light	0	20	20	0
5	Gr3>CsChrimson	ATR	CO2	Gr3>CsChrimson_CO2	12	8	20	0.6
5	Gr3>CsChrimson	ATR	none	Gr3>CsChrimson_none	0	20	20	0
5	Gr3>CsChrimson	ATR	light	Gr3>CsChrimson_light	11	9	20	0.55
5	Gr3/+	ATR	CO2	Gr3_CO2	7	13	20	0.35
5	Gr3/+	ATR	none	Gr3_none	0	20	20	0
5	Gr3/+	ATR	light	Gr3_light	0	20	20	0
6	Gr3/+	ATR	CO2	Gr3_CO2	4	16	20	0.2
6	Gr3/+	ATR	none	Gr3_none	2	18	20	0.1
6	Gr3/+	ATR	light	Gr3_light	2	18	20	0.1
6	CsChrimson/+	ATR	CO2	CsChrimson_CO2	6	14	20	0.3
6	CsChrimson/+	ATR	none	CsChrimson_none	1	19	20	0.05
6	CsChrimson/+	ATR	light	CsChrimson_light	0	19	19	0
6	Gr3>CsChrimson	ATR	CO2	Gr3>CsChrimson_CO2	8	12	20	0.4
6	Gr3>CsChrimson	ATR	none	Gr3>CsChrimson_none	1	19	20	0.05
6	Gr3>CsChrimson	ATR	light	Gr3>CsChrimson_light	9	10	19	0.473684
7	Gr3>CsChrimson	ATR	CO2	Gr3>CsChrimson_CO2	6	13	19	0.315789
7	Gr3>CsChrimson	ATR	none	Gr3>CsChrimson_none	1	20	21	0.0476191
7	Gr3>CsChrimson	ATR	light	Gr3>CsChrimson_light	13	6	19	0.684211
7	Gr3/+	ATR	CO2	Gr3_CO2	5	15	20	0.25
7	Gr3/+	ATR	none	Gr3_none	2	18	20	0.1
7	Gr3/+	ATR	light	Gr3_light	0	20	20	0
7	CsChrimson/+	ATR	CO2	CsChrimson_CO2	8	12	20	0.4
7	CsChrimson/+	ATR	none	CsChrimson_none	0	20	20	0
7	CsChrimson/+	ATR	light	CsChrimson_light	0	20	20	0

## Sheet: Figure 1 FS1B
Figure 1 - figure supplement 1B
0.28 µW/mm^2
time	-120	-114.975	-109.951	-104.926	-99.9015	-94.8768	-89.8522	-84.8276	-79.803	-74.7783	-69.7537	-64.7291	-59.7044	-54.6798	-49.6552	-44.6305	-39.6059	-34.5813	-29.5567	-24.532	-19.5074	-14.4828	-9.45813	-4.4335	0.591133	5.61576	10.6404	15.665	20.6897	25.7143	30.7389	35.7635	40.7882	45.8128	50.8374	55.8621	60.8867	65.9113	70.936	75.9606	80.9852	86.0099	91.0345	96.0591	101.084	106.108	111.133	116.158	121.182
walk3	0.0235714	0.0321667	0.0295714	0.0273095	0.0299286	0.0342857	0.0375	0.0335238	0.0352381	0.0366429	0.0290238	0.0294048	0.0333333	0.0468095	0.0359762	0.0335714	0.0324762	0.0322143	0.0210238	0.028881	0.025881	0.0284762	0.0277381	0.0301905	0.078	0.0946667	0.0619286	0.0577619	0.0457857	0.0468095	0.065881	0.0644524	0.0454048	0.0393095	0.047	0.0446905	0.0501905	0.0426905	0.0458333	0.0409762	0.0448095	0.0571905	0.0610714	0.049	0.0439524	0.0585	0.0642381	0.0639524	0.0432619
probe5	0.00864286	0.00957143	0.0136667	0.0126667	0.013381	0.0131905	0.0133095	0.0125952	0.0187143	0.0145	0.0121667	0.00769048	0.00940476	0.013381	0.0168095	0.0128571	0.0141905	0.0168095	0.0155714	0.0118333	0.0127143	0.0156429	0.012	0.0145476	0.0220238	0.020119	0.017381	0.0154524	0.016619	0.0110476	0.0109524	0.00895238	0.0115476	0.0077381	0.00659524	0.0105952	0.0106905	0.0138333	0.0114524	0.0087619	0.00942857	0.0157381	0.0140952	0.0139286	0.0150476	0.00997619	0.0145476	0.00671429	0.00507143
fly2	0.00252381	0.000404762	0.00552381	0.00542857	0.00240476	0.00133333	0.00102381	0.000952381	0.00402381	4.7619e-05	0.00357143	0.00421429	7.14286e-05	0.00221429	0.00328571	0.00364286	0.00242857	0.00197619	0.00142857	0.00540476	0.0015	0.000738095	0.00261905	0.00138095	0.0245	0.00435714	0.00195238	0.00314286	0.00338095	0.00121429	0.00183333	0.000928571	0.00409524	0.00433333	0.00147619	0.0027619	0.00421429	0.0067381	0.00178571	0.00266667	0.00678571	0.00254762	0.00207143	0.00342857	0.001	0.00257143	0.00280952	0.00219048	0.00316667
0.56 µW/mm^2
time	-120	-114.975	-109.951	-104.926	-99.9015	-94.8768	-89.8522	-84.8276	-79.803	-74.7783	-69.7537	-64.7291	-59.7044	-54.6798	-49.6552	-44.6305	-39.6059	-34.5813	-29.5567	-24.532	-19.5074	-14.4828	-9.45813	-4.4335	0.591133	5.61576	10.6404	15.665	20.6897	25.7143	30.7389	35.7635	40.7882	45.8128	50.8374	55.8621	60.8867	65.9113	70.936	75.9606	80.9852	86.0099	91.0345	96.0591	101.084	106.108	111.133	116.158	121.182
walk3	0.0156463	0.0185488	0.0207937	0.0266213	0.0234467	0.0241723	0.0194331	0.0216553	0.0255782	0.0285714	0.0240816	0.0280045	0.0275964	0.0270748	0.0260771	0.0246712	0.0209524	0.0263946	0.0295465	0.0267347	0.0265306	0.022449	0.0324943	0.0221769	0.1361	0.115669	0.069932	0.0618594	0.0522222	0.057415	0.0586848	0.0513379	0.0508617	0.0514739	0.0543084	0.0573696	0.0427211	0.0403628	0.0512925	0.0486848	0.0432653	0.0475283	0.0510204	0.0481179	0.0463039	0.0451474	0.0435601	0.0415193	0.048254
probe5	0.00829932	0.00811791	0.00804989	0.00292517	0.00430839	0.00630385	0.00709751	0.008322	0.00630385	0.00632653	0.00741497	0.00659864	0.0112925	0.0110431	0.0045805	0.00380952	0.00349206	0.00603175	0.00571429	0.00727891	0.00650794	0.00770975	0.00730159	0.00807256	0.024127	0.0187528	0.0113832	0.00782313	0.0146032	0.0107029	0.0119955	0.0099093	0.0107029	0.00664399	0.0117687	0.0129478	0.0102721	0.00834467	0.00941043	0.0104535	0.00410431	0.0108844	0.00870748	0.00521542	0.00433107	0.00739229	0.00909297	0.0107256	0.0131519
fly2	0.00473923	0.00204082	0.000498866	0.000884354	0.000884354	0.00185941	0.00047619	0.00015873	0.000884354	0.000929705	0.00380952	0.000430839	0.00251701	0.000680272	0.000929705	0	9.07029e-05	0.00301587	0.000793651	0.00208617	0.00145125	0.00176871	0.00208617	0.000907029	0.038254	0.008322	0.00589569	0.00235828	0.00507937	0.001678	0.000612245	0.000589569	0.00535147	0.0037415	0.00263039	0.00287982	0.000430839	0.00258503	0.00235828	0.00154195	0.0014966	0.000680272	0.00621315	0.00272109	0.00256236	0.00439909	0.00344671	0.00414966	0.00251701
1.1 µW/mm^2
time	-120	-114.975	-109.951	-104.926	-99.9015	-94.8768	-89.8522	-84.8276	-79.803	-74.7783	-69.7537	-64.7291	-59.7044	-54.6798	-49.6552	-44.6305	-39.6059	-34.5813	-29.5567	-24.532	-19.5074	-14.4828	-9.45813	-4.4335	0.591133	5.61576	10.6404	15.665	20.6897	25.7143	30.7389	35.7635	40.7882	45.8128	50.8374	55.8621	60.8867	65.9113	70.936	75.9606	80.9852	86.0099	91.0345	96.0591	101.084	106.108	111.133	116.158	121.182
walk3	0.0433333	0.0373469	0.0436735	0.0315646	0.0345805	0.0330159	0.0337188	0.0335147	0.0271655	0.0205442	0.0275964	0.0331066	0.023356	0.0259864	0.0260317	0.019932	0.0307937	0.0362585	0.0284807	0.0239683	0.0201134	0.0146032	0.0238322	0.0235147	0.181361	0.161927	0.0909751	0.0667347	0.0610884	0.0643084	0.0735601	0.0636054	0.0721995	0.0901134	0.0775057	0.078254	0.080839	0.0904082	0.0813832	0.0714059	0.07322	0.0831066	0.105986	0.0955102	0.0947166	0.0904535	0.113333	0.114875	0.0763265
probe5	0.0118594	0.00770975	0.0119048	0.00741497	0.00546485	0.00802721	0.00945578	0.0149206	0.0106576	0.00619048	0.00655329	0.0085941	0.00705215	0.0103401	0.00909297	0.0109751	0.00936508	0.00571429	0.00823129	0.0103401	0.00827664	0.00922902	0.0070068	0.00820862	0.0384807	0.027619	0.0322902	0.0353061	0.0210884	0.0301134	0.0222902	0.0188435	0.00984127	0.0175057	0.0190703	0.0180499	0.0218141	0.0162132	0.0194558	0.0142177	0.0159637	0.0216553	0.0136961	0.022381	0.0138549	0.0195692	0.0202041	0.017551	0.0158503
fly2	0.00306122	0.00240363	0.00138322	0.00147392	0.000952381	0.000272109	0.000725624	0.00138322	0.000362812	0.00344671	0.00126984	0.00208617	0.00256236	0.000294785	0.00104308	0.00247166	0.000634921	0.00151927	0.00154195	0.000204082	0.001678	0.00376417	0.001678	0.00306122	0.0843991	0.0114966	0.00138322	0.00492063	0.00201814	0.00414966	0.00439909	0.00557823	0.00179138	0.00446712	0.00319728	0.0044898	0.00335601	0.00315193	0.00417234	0.00514739	0.00585034	0.00768707	0.00662132	0.00321995	0.00290249	0.00562358	0.0014059	0.00260771	0.00521542
2.3 µW/mm^2
time	-120	-114.975	-109.951	-104.926	-99.9015	-94.8768	-89.8522	-84.8276	-79.803	-74.7783	-69.7537	-64.7291	-59.7044	-54.6798	-49.6552	-44.6305	-39.6059	-34.5813	-29.5567	-24.532	-19.5074	-14.4828	-9.45813	-4.4335	0.591133	5.61576	10.6404	15.665	20.6897	25.7143	30.7389	35.7635	40.7882	45.8128	50.8374	55.8621	60.8867	65.9113	70.936	75.9606	80.9852	86.0099	91.0345	96.0591	101.084	106.108	111.133	116.158	121.182
walk3	0.0188435	0.0190249	0.0171655	0.0311791	0.0324036	0.0305215	0.0319048	0.031746	0.0323129	0.0315646	0.0352834	0.0303175	0.0315193	0.0218141	0.0221995	0.0244671	0.0258503	0.0281179	0.0353288	0.0270522	0.0274603	0.0228571	0.035737	0.0252381	0.170181	0.173878	0.128413	0.106463	0.0956236	0.105011	0.0993424	0.105533	0.102063	0.10585	0.128753	0.131383	0.130272	0.117098	0.117279	0.120181	0.123878	0.136281	0.164082	0.143515	0.12068	0.131814	0.128481	0.121224	0.141338
probe5	0.00673469	0.0110204	0.00725624	0.0144218	0.0103628	0.0084127	0.0112472	0.0124263	0.019093	0.0157596	0.0139683	0.0142177	0.0117914	0.0125397	0.00852608	0.0106122	0.0100454	0.00358277	0.00845805	0.00950113	0.00802721	0.00750567	0.0107256	0.0103628	0.0532653	0.043288	0.0315193	0.0318821	0.0376417	0.0370295	0.0380952	0.0366893	0.039229	0.0354422	0.0333107	0.0243537	0.0227891	0.0285941	0.0288662	0.0294558	0.0261224	0.0253968	0.0325397	0.0251247	0.0221542	0.0268481	0.0238322	0.0199093	0.0161451
fly2	0.000453515	0.00204082	0.0014966	0.00160998	0.000680272	0.000408163	0.0014966	0.000408163	0.00385488	0.00560091	0.00260771	0.00217687	0.00226757	0.000272109	0.000657596	0.00519274	0.00290249	0.00206349	0.0023356	0.00292517	0.00274376	0.00111111	0.00353741	0.00276644	0.119637	0.0192063	0.00253968	0.0024263	0.00244898	0.00480726	0.00585034	0.0038322	0.00151927	0.00512472	0.00437642	0.00342404	0.00662132	0.00646259	0.00555556	0.00185941	0.00746032	0.00716553	0.00251701	0.00471655	0.00630385	0.00442177	0.00575964	0.00981859	0.00913832
4.5 µW/mm^2
time	-120	-114.975	-109.951	-104.926	-99.9015	-94.8768	-89.8522	-84.8276	-79.803	-74.7783	-69.7537	-64.7291	-59.7044	-54.6798	-49.6552	-44.6305	-39.6059	-34.5813	-29.5567	-24.532	-19.5074	-14.4828	-9.45813	-4.4335	0.591133	5.61576	10.6404	15.665	20.6897	25.7143	30.7389	35.7635	40.7882	45.8128	50.8374	55.8621	60.8867	65.9113	70.936	75.9606	80.9852	86.0099	91.0345	96.0591	101.084	106.108	111.133	116.158	121.182
walk3	0.019932	0.0265079	0.0204989	0.016576	0.0244898	0.0258277	0.0212698	0.0128571	0.0182313	0.0196599	0.0217234	0.015102	0.0119501	0.0237188	0.0212698	0.0217234	0.0255556	0.0183447	0.0201361	0.0194558	0.0223356	0.0205215	0.0212245	0.021746	0.20068	0.254694	0.188095	0.142041	0.161429	0.158549	0.154263	0.15873	0.171429	0.170726	0.163469	0.172834	0.179002	0.193583	0.201224	0.193243	0.17805	0.168707	0.184195	0.207687	0.190658	0.166054	0.163832	0.171338	0.186576
probe5	0.00335601	0.00351474	0.00451247	0.00546485	0.00591837	0.00351474	0.00419501	0.00539683	0.00301587	0.00498866	0.0084127	0.00562358	0.00310658	0.0085941	0.00566893	0.00664399	0.00503401	0.00437642	0.00612245	0.00569161	0.00489796	0.00235828	0.00401361	0.00501134	0.0406576	0.0566893	0.0650567	0.0526757	0.0563719	0.0596145	0.0536508	0.0487075	0.0469615	0.0508163	0.0498413	0.0619955	0.0575057	0.0415873	0.0274376	0.0394104	0.0409297	0.0419501	0.0503628	0.0419274	0.0481179	0.027551	0.0271202	0.0290023	0.0388209
fly2	0.000362812	0.000430839	0.000770975	0.00401361	0.00170068	0.00303855	0	0.00165533	0.00446712	0.00238095	0.00371882	0.00442177	0.00174603	0.00151927	0	0.00206349	0.00138322	0.00319728	0.00213152	0.00238095	0.000385488	0.00240363	0.00113379	0.00113379	0.123923	0.0197959	0.00702948	0.00734694	0.00598639	0.0060771	0.0077551	0.00664399	0.00512472	0.00634921	0.00752834	0.00609977	0.0055102	0.00659864	0.00521542	0.0084127	0.00721088	0.0069161	0.0109524	0.00526077	0.00512472	0.00854875	0.00528345	0.00988662	0.00698413
9 µW/mm^2
time	-120	-114.975	-109.951	-104.926	-99.9015	-94.8768	-89.8522	-84.8276	-79.803	-74.7783	-69.7537	-64.7291	-59.7044	-54.6798	-49.6552	-44.6305	-39.6059	-34.5813	-29.5567	-24.532	-19.5074	-14.4828	-9.45813	-4.4335	0.591133	5.61576	10.6404	15.665	20.6897	25.7143	30.7389	35.7635	40.7882	45.8128	50.8374	55.8621	60.8867	65.9113	70.936	75.9606	80.9852	86.0099	91.0345	96.0591	101.084	106.108	111.133	116.158	121.182
walk3	0.0197279	0.0104989	0.0227891	0.0226757	0.0223583	0.0285941	0.0234694	0.01322	0.0178458	0.0209977	0.015873	0.0219274	0.0253968	0.019229	0.0218821	0.0236508	0.0161905	0.0131066	0.0104989	0.0124263	0.0129025	0.0121088	0.0125397	0.0136735	0.171746	0.230612	0.204036	0.187574	0.18576	0.170136	0.1778	0.185057	0.215737	0.235556	0.240068	0.246009	0.242562	0.228685	0.216644	0.227846	0.214308	0.235125	0.221497	0.246327	0.244376	0.265556	0.25966	0.247596	0.262472
probe5	0.00619048	0.00489796	0.00603175	0.00528345	0.00503401	0.0044898	0.00519274	0.00439909	0.00539683	0.00596372	0.00605442	0.00739229	0.00510204	0.00678005	0.00721088	0.00884354	0.00816327	0.00630385	0.0068254	0.00870748	0.00802721	0.00349206	0.0104535	0.0136281	0.0505215	0.0664626	0.0804989	0.0930385	0.100227	0.088254	0.0834694	0.0833787	0.0745125	0.0676871	0.069932	0.0866213	0.0699773	0.0645578	0.0511111	0.0463039	0.0431066	0.0556463	0.0588209	0.0535828	0.0419274	0.0436735	0.0575057	0.0464853	0.0459864
fly2	0.00306122	0.00115646	0.000204082	0.00185941	0.000272109	0.00278912	0.00147392	0.00335601	0.000861678	0.00108844	0.00133787	0.000861678	0.000748299	4.53515e-05	2.26757e-05	0.00108844	0.00151927	0.000612245	0.000294785	0.000634921	0.000204082	9.07029e-05	0.000385488	0.00387755	0.10458	0.0187075	0.00469388	0.00648526	0.0124036	0.00956916	0.00721088	0.0077551	0.00907029	0.00886621	0.00646259	0.00634921	0.00473923	0.00668934	0.00482993	0.0131519	0.0136508	0.0135374	0.0114059	0.00891156	0.0118821	0.00603175	0.00571429	0.0141043	0.00875283
18 µW/mm^2
time	-120	-114.975	-109.951	-104.926	-99.9015	-94.8768	-89.8522	-84.8276	-79.803	-74.7783	-69.7537	-64.7291	-59.7044	-54.6798	-49.6552	-44.6305	-39.6059	-34.5813	-29.5567	-24.532	-19.5074	-14.4828	-9.45813	-4.4335	0.591133	5.61576	10.6404	15.665	20.6897	25.7143	30.7389	35.7635	40.7882	45.8128	50.8374	55.8621	60.8867	65.9113	70.936	75.9606	80.9852	86.0099	91.0345	96.0591	101.084	106.108	111.133	116.158	121.182
walk3	0.010771	0.0109524	0.0124717	0.0145805	0.0125624	0.011678	0.0129932	0.0085034	0.00637188	0.0128571	0.0146485	0.01161	0.00501134	0.00687075	0.0133333	0.0160544	0.0121769	0.0189796	0.0127438	0.00229025	0.00777778	0.0221995	0.0153968	0.0193197	0.225374	0.253719	0.27102	0.239751	0.240431	0.246689	0.255782	0.238277	0.240476	0.241338	0.242562	0.262222	0.25746	0.229546	0.266122	0.266644	0.262449	0.283832	0.262812	0.254762	0.283764	0.287166	0.271429	0.274218	0.270363
probe5	0.00609977	0.00548753	0.00605442	0.00544218	0.00673469	0.00560091	0.00571429	0.00650794	0.00750567	0.00752834	0.00755102	0.00965986	0.00428571	0.00231293	0.00360544	0.00585034	0.00641723	0.00909297	0.0078458	0.00868481	0.00986395	0.00911565	0.00662132	0.00671202	0.0570522	0.0937642	0.118481	0.114603	0.131746	0.126757	0.120544	0.109229	0.11415	0.0969161	0.095805	0.0938549	0.0953968	0.066644	0.0797732	0.0687528	0.0855102	0.0746259	0.0727211	0.0729025	0.0598413	0.0569841	0.0714286	0.0685941	0.0649433
fly2	0.000884354	0.000408163	0	0.000362812	0.000181406	0.00104308	0.000113379	0.00165533	0.000952381	0.00126984	0.000816327	0.00120181	0.000408163	0.000340136	0.00195011	0.00235828	0.000566893	0.000430839	0.000136054	0.000657596	0.000385488	0.000770975	0.00156463	0.00131519	0.0855329	0.0202041	0.00659864	0.0126984	0.00580499	0.00553288	0.00907029	0.00623583	0.00575964	0.00727891	0.0070068	0.00929705	0.0104762	0.0109977	0.00698413	0.00943311	0.0136735	0.00698413	0.0160544	0.0128345	0.0113379	0.00732426	0.00818594	0.0186168	0.0113605
36 µW/mm^2
time	-120	-114.975	-109.951	-104.926	-99.9015	-94.8768	-89.8522	-84.8276	-79.803	-74.7783	-69.7537	-64.7291	-59.7044	-54.6798	-49.6552	-44.6305	-39.6059	-34.5813	-29.5567	-24.532	-19.5074	-14.4828	-9.45813	-4.4335	0.591133	5.61576	10.6404	15.665	20.6897	25.7143	30.7389	35.7635	40.7882	45.8128	50.8374	55.8621	60.8867	65.9113	70.936	75.9606	80.9852	86.0099	91.0345	96.0591	101.084	106.108	111.133	116.158	121.182
walk3	0.0197959	0.0230839	0.0198186	0.0228798	0.0214739	0.0261905	0.0199773	0.0236961	0.0160317	0.0223356	0.0199546	0.0235828	0.0237188	0.0234014	0.0178231	0.0253968	0.024195	0.0331973	0.0306122	0.0154195	0.0235147	0.0208844	0.0211791	0.0182086	0.234399	0.284059	0.333832	0.343605	0.330975	0.297642	0.280771	0.30483	0.296213	0.292971	0.298186	0.332086	0.336463	0.359615	0.33678	0.319796	0.341497	0.355669	0.340907	0.33263	0.325261	0.303356	0.316485	0.327302	0.345057
probe5	0.00349206	0.00659864	0.0069161	0.00807256	0.00825397	0.00716553	0.00693878	0.0119501	0.00789116	0.0112698	0.0136735	0.00782313	0.00818594	0.0061678	0.0110431	0.0092517	0.0085034	0.0171882	0.0133107	0.0137642	0.0124717	0.0176417	0.010839	0.0111791	0.0586621	0.148821	0.221202	0.200952	0.19288	0.161224	0.137415	0.162698	0.141519	0.121655	0.111429	0.11898	0.11585	0.118118	0.119206	0.123878	0.109501	0.12059	0.10263	0.0924263	0.080068	0.0729705	0.0901814	0.0912698	0.089161
fly2	0.00256236	0.0022449	0.00251701	0.00120181	0.00154195	0.000340136	0.00226757	0.00151927	0.00356009	0.000839002	0.00256236	0.000839002	0.00047619	0.00217687	0.00126984	0.00108844	0.00258503	0.00183673	0.000725624	0.00226757	0.00102041	0.00190476	0.00047619	0.000725624	0.0602494	0.0151701	0.00882086	0.00863946	0.00650794	0.00496599	0.00653061	0.00408163	0.0101587	0.00666667	0.00909297	0.00938776	0.00965986	0.00752834	0.0132653	0.0077551	0.0104535	0.0142177	0.00977324	0.00718821	0.0149206	0.0116553	0.0085941	0.0122676	0.0130159
[truncated: 155 more columns]

## Sheet: Figure 1 FS1C
Figure 1 - figure supplement 1C
mosquito	behavior_prop	stimulus
0	0	0.28125
0	0.0328148	0.5625
0	0.067963	1.12
0	0.0295185	2.255
0	0.0636667	4.5
0	0.138259	9
0	0.250222	18
0	0.452852	36
1	0.00427778	0.28125
1	0.0375556	0.5625
1	0.179889	1.12
1	0.191667	2.255
1	0.152296	4.5
1	0.335815	9
1	0.386667	18
1	0.426	36
2	0.00461111	0.28125
2	0.0017037	0.5625
2	0.0919259	1.12
2	0.0567407	2.255
2	0.182556	4.5
2	0.193185	9
2	0.218704	18
2	0.208296	36
3	0.000444444	0.28125
3	0.00155556	0.5625
3	0.0479259	1.12
3	0.0389259	2.255
3	0.0875185	4.5
3	0.0922593	9
3	0.224963	18
3	0.104148	36
4	0.106056	0.28125
4	0.162778	0.5625
4	0.14763	1.12
4	0.343074	2.255
4	0.640222	4.5
4	0.404889	9
4	0.699185	18
4	0.571074	36
5	0.000666667	0.28125
5	0.0474444	0.5625
5	0.0495926	1.12
5	0.124926	2.255
5	0.19063	4.5
5	0.269333	9
5	0.360074	18
5	0.389111	36
6	0	0.28125
6	0.0126667	0.5625
6	0	1.12
6	0.0125926	2.255
6	0.0594074	4.5
6	0.108852	9
6	0.25037	18
6	0.380037	36
7	0.0610556	0.28125
7	0.000481481	0.5625
7	0.148889	1.12
7	0.342037	2.255
7	0.44637	4.5
7	0.56037	9
7	0.553519	18
7	0.634111	36
8	0	0.28125
8	0.0727037	0.5625
8	0.00918519	1.12
8	0.0629259	2.255
8	0.152963	4.5
8	0.230926	9
8	0.379407	18
8	0.412	36
9	0.197333	0.28125
9	0.0614444	0.5625
9	0.139667	1.12
9	0.116556	2.255
9	0.0865185	4.5
9	0.0961481	9
9	0.067	18
9	0.0767778	36
10	0.0494444	0.28125
10	0.000555556	0.5625
10	0.094	1.12
10	0.207778	2.255
10	0.335111	4.5
10	0.201556	9
10	0.467148	18
10	0.451704	36
11	0.123333	0.28125
11	0.0151111	0.5625
11	0.187519	1.12
11	0.358667	2.255
11	0.311333	4.5
11	0.32037	9
11	0.283148	18
11	0.46237	36
12	0.000833333	0.28125
12	0.0594815	0.5625
12	0.00666667	1.12
12	0.171259	2.255
12	0.186111	4.5
12	0.178556	9
12	0.344741	18
12	0.249593	36
13	0.099	0.28125
13	0	0.5625
13	0.0474444	1.12
13	0.419481	2.255
13	0.261815	4.5
13	0.370704	9
13	0.483407	18
13	0.651	36
14	0.00333333	0.28125
14	0.00848148	0.5625
14	0.013037	1.12
14	0.00211111	2.255
14	0.093	4.5
14	0.211556	9
14	0.22337	18
14	0.202667	36
15	0	0.28125
15	0.0174444	0.5625
15	0.0386667	1.12
15	0.126815	2.255
15	0.263148	4.5
15	0.324148	9
15	0.496333	18
15	0.474296	36
16	0	0.28125
16	0.00281481	0.5625
16	0.107148	1.12
16	0.0748889	2.255
16	0.0835185	4.5
16	0.0641111	9
16	0.0839259	18
16	0.151963	36
17	0.011	0.28125
17	0.066	0.5625
17	0.00662963	1.12
17	0.199667	2.255
17	0.182593	4.5
17	0.365111	9
17	0.35937	18
17	0.358963	36
18	0.002	0.28125
18	0.0111111	0.5625
18	0.0210741	1.12
18	0.0409259	2.255
18	0.066963	4.5
18	0.159037	9
18	0.126111	18
18	0.234	36
19	0.0197037	0.28125
19	0.0631111	0.5625
19	0.133593	1.12
19	0.182222	2.255
19	0.145444	4.5
19	0.209778	9
19	0.31463	18
19	0.375259	36
20	0.000518519	0.28125
20	0.00459259	0.5625
20	0.00148148	1.12
20	0.278074	2.255
20	0.306111	4.5
20	0.26837	9
20	0.363963	18
20	0.465148	36
21	0	0.28125
21	0.00777778	0.5625
21	0.0207037	1.12
21	0.191259	2.255
21	0.151741	4.5
21	0.202111	9
21	0.255407	18
21	0.183222	36
22	0.0678148	0.28125
22	0.07	0.5625
22	0.238889	1.12
22	0.0982963	2.255
22	0.297185	4.5
22	0.517444	9
22	0.474778	18
22	0.657963	36
23	0	0.28125
23	0.00125926	0.5625
23	0	1.12
23	0.0722963	2.255
23	0.120926	4.5
23	0.127222	9
23	0.0571111	18
23	0.0368889	36
24	0.00351852	0.28125
24	0.000481481	0.5625
24	0.09	1.12
24	0.166185	2.255
24	0.19763	4.5
24	0.226481	9
24	0.28637	18
24	0.38863	36
25	0.00122222	0.28125
25	0.0104074	0.5625
25	0.0428148	1.12
25	0.105852	2.255
25	0.129296	4.5
25	0.201407	9
25	0.257593	18
25	0.324333	36
26	0.00448148	0.28125
26	0.0239259	0.5625
26	0.0211481	1.12
26	0.00692593	2.255
26	0.0843704	4.5
26	0.033963	9
26	0.123259	18
26	0.155296	36
27	0	0.28125
27	0.0118519	0.5625
27	0.0331852	1.12
27	0.0469259	2.255
27	0.119889	4.5
27	0.203037	9
27	0.179111	18
27	0.21963	36
28	0.018	0.28125
28	0.0343704	0.5625
28	0.0673333	1.12
28	0.0774074	2.255
28	0.210037	4.5
28	0.415889	9
28	0.363481	18
28	0.325074	36
29	0.0838889	0.28125
29	0.00959259	0.5625
29	0.0315926	1.12
29	0.0135926	2.255
29	0.046037	4.5
29	0.0488148	9
29	0.0345556	18
29	0.218333	36
30	0.000407407	0.28125
30	0.0343333	0.5625
30	0.0174444	1.12
30	0.243704	2.255
30	0.0105926	4.5
30	0.0869259	9
30	0.213296	18
30	0.179593	36
31	0.0710741	0.28125
31	0.0517037	0.5625
31	0.0545926	1.12
31	0.0381852	2.255
31	0.0264815	4.5
31	0.0268889	9
31	0.037037	18
31	0.0701852	36
32	0.0591852	0.28125
32	0.136889	0.5625
32	0.093	1.12
32	0.145333	2.255
32	0.109889	4.5
32	0.251481	9
32	0.190741	18
32	0.176296	36
33	0.0434815	0.28125
33	0.0482963	0.5625
33	0.062963	1.12
33	0.0768889	2.255
33	0.0952963	4.5
33	0.0921111	9
33	0.0372593	18
33	0.140778	36
34	0.109296	0.28125
34	0.00396296	0.5625
34	0.0942222	1.12
34	0.0478519	2.255
34	0.157	4.5
34	0.0748148	9
34	0.141333	18
34	0.141593	36
35	0.0437037	0.28125
35	0.210519	0.5625
35	0.0702593	1.12
35	0.238667	2.255
35	0.211778	4.5
35	0.165593	9
35	0.29737	18
35	0.290889	36
36	0.00159259	0.28125
36	0	0.5625
36	0.0586667	1.12
36	0.0231111	2.255
36	0.0837037	4.5
36	0.105037	9
36	0.0906296	18
36	0.102185	36
37	0.0123333	0.28125
37	0.0343333	0.5625
37	0.0615556	1.12
37	0.0496296	2.255
37	0.0891852	4.5
37	0.135926	9
37	0.0352222	18
37	0.138815	36
38	0.0732593	0.28125
38	0.0235926	0.5625
38	0.0763704	1.12
38	0.247741	2.255
38	0.0986667	4.5
38	0.324889	9
38	0.252185	18
38	0.365593	36
39	0.0368148	0.28125
39	0.0496296	0.5625
39	0.0207778	1.12
39	0.12863	2.255
39	0.221519	4.5
39	0.0865185	9
39	0.161444	18
39	0.242148	36
40	0	0.28125
40	0.00118519	0.5625
40	0.0670741	1.12
40	0.00955556	2.255
40	0.0379259	4.5
40	0.0739259	9
40	0.129074	18
40	0.142037	36
41	0.088963	0.28125
41	0.138852	0.5625
41	0.0805185	1.12
41	0.0503704	2.255
41	0.180444	4.5
41	0.116333	9
41	0.234111	18
41	0.256407	36
42	0.0137778	0.28125
42	0.0563333	0.5625
42	0.0469259	1.12
42	0.0537037	2.255
42	0.134	4.5
42	0.118	9
42	0.31637	18
42	0.210333	36
43	0	0.28125
43	0	0.5625
43	0	1.12
43	0.0714815	2.255
43	0.20063	4.5
43	0.153185	9
43	0.297259	18
43	0.167963	36
44	0.162778	0.28125
44	0.0268148	0.5625
44	0.0115556	1.12
44	0.0382593	2.255
44	0.091963	4.5
44	0.128407	9
44	0.281407	18
44	0.241741	36
45	0.0955556	0.28125
45	0.092	0.5625
45	0.196333	1.12
45	0.0101111	2.255
45	0.182333	4.5
45	0.209074	9
45	0.00107407	18
45	0.341741	36
46	0.0827037	0.28125
46	0.0177407	0.5625
46	0.106222	1.12
46	0.052	2.255
46	0.135037	4.5
46	0.128704	9
46	0.190593	18
46	0.401296	36
47	0.00648148	0.28125
47	0.036	0.5625
47	0.0805926	1.12
47	0.103704	2.255
47	0.0386296	4.5
47	0.0206667	9
47	0.0663333	18
47	0.12137	36
48	0.0765185	0.28125
48	0.0572222	0.5625
48	0.139259	1.12
48	0.197667	2.255
48	0.0135926	4.5
48	0.0497037	9
48	0.092	18
48	0.170704	36
49	0	0.28125
49	0.0286296	0.5625
49	0.0144074	1.12
49	0.0455185	2.255
49	0.324741	4.5
49	0.0792222	9
49	0.117889	18
49	0.103037	36
50	0.0384074	0.28125
50	0.143481	0.5625
50	0.191889	1.12
50	0.191259	2.255
50	0.380593	4.5
50	0.265889	9
50	0.287222	18
50	0.292444	36
51	0	0.28125
51	0.00896296	0.5625
51	0.112148	1.12
51	0.15363	2.255
51	0.103296	4.5
51	0.0395926	9
51	0.223963	18
51	0.472926	36
52	0.0991111	0.28125
52	0.314407	0.5625
52	0.395259	1.12
52	0.284889	2.255
52	0.278444	4.5
52	0.195296	9
52	0.463333	18
52	0.365963	36
53	0	0.28125
53	0	0.5625
53	0.0802963	1.12
53	0	2.255
53	0.00544444	4.5
53	0.114111	9
53	0.215185	18
53	0.214444	36
54	0.018	0.28125
54	0.0215926	0.5625
54	0.0977407	1.12
54	0.0412593	2.255
54	0.0345556	4.5
54	0.0896296	9
54	0.0246667	18
54	0.0405185	36
55	0.00177778	0.28125
55	0.0735185	0.5625
55	0.0298148	1.12
55	0.084963	2.255
55	0.194889	4.5
55	0.0994074	9
55	0.335407	18
55	0.188037	36
56	0	0.28125
56	0	0.5625
56	0.0613333	1.12
56	0.0532963	2.255
56	0.0763704	4.5
56	0.176519	9
56	0.239704	18
56	0.126444	36
57	0.112667	0.28125
57	0.0823333	0.5625
57	0.0975556	1.12
57	0.130556	2.255
57	0.108852	4.5
57	0.244815	9
57	0.175222	18
57	0.180111	36
58	0.0265926	0.28125
58	0.0549259	0.5625
58	0.0498889	1.12
58	0.163704	2.255
58	0.049	4.5
58	0.22737	9
58	0.175296	18
58	0.237037	36
59	0.0461481	0.28125
59	0.136222	0.5625
59	0.173926	1.12
59	0.222407	2.255
59	0.154481	4.5
59	0.367852	9
59	0.26637	18
59	0.47963	36
60	0.0808889	0.28125
60	0.142741	0.5625
60	0.143074	1.12
60	0.264667	2.255
60	0.376556	4.5
60	0.363815	9
60	0.334222	18
60	0.264111	36
61	0.000185185	0.28125
61	0.00959259	0.5625
61	0.0502963	1.12
61	0.0135926	2.255
61	0.0162593	4.5
61	0.043037	9
61	0.197407	18
61	0.331074	36
62	0.0238889	0.28125
62	0.0301852	0.5625
62	0.0765185	1.12
62	0.045	2.255
62	0.135889	4.5
62	0.210222	9
62	0.184407	18
62	0.254111	36
63	0.178852	0.28125
63	0.195741	0.5625
63	0.192778	1.12
63	0.55863	2.255
63	0.730222	4.5
63	0.713111	9
63	0.590074	18
63	0.806667	36
64	0	0.28125
64	0.0195185	0.5625
64	0.0475556	1.12
64	0.107889	2.255
64	0.185481	4.5
64	0.350815	9
64	0.452778	18
64	0.472444	36
65	0.134926	0.28125
65	0.213296	0.5625
65	0.0621111	1.12
65	0.118593	2.255
65	0.180667	4.5
65	0.22063	9
65	0.0860741	18
65	0.265889	36
66	0.0304444	0.28125
66	0.0438889	0.5625
66	0.163963	1.12
66	0.145815	2.255
66	0.139074	4.5
66	0.136185	9
66	0.226519	18
66	0.260667	36
67	0.0281111	0.28125
67	0.0277407	0.5625
67	0.0297778	1.12
67	0.148852	2.255
67	0.162	4.5
67	0.340444	9
67	0.260074	18
67	0.373185	36
68	0.0181481	0.28125
68	0.0195926	0.5625
68	0.035963	1.12
68	0.0533333	2.255
68	0.116296	4.5
68	0.132037	9
68	0.406	18
68	0.181926	36
69	0.0393704	0.28125
69	0.0865185	0.5625
69	0.093037	1.12
69	0.0964815	2.255
69	0.238074	4.5
69	0.322741	9
69	0.289259	18
69	0.366333	36
70	0.00185185	0.28125
70	0.00118519	0.5625
70	0.11237	1.12
70	0	2.255
70	0.283556	4.5
70	0.194704	9
70	0.163963	18
70	0.188667	36
71	0.185926	0.28125
71	0.182111	0.5625
71	0.287667	1.12
71	0.221704	2.255
71	0.372259	4.5
71	0.33763	9
71	0.413444	18
71	0.300333	36
72	0.0211852	0.28125
72	0.0257407	0.5625
72	0.218852	1.12
72	0.152556	2.255
72	0.309	4.5
72	0.268926	9
72	0.345	18
72	0.458037	36
73	0.0188148	0.28125
73	0.00696296	0.5625
73	0.00592593	1.12
73	0.133407	2.255
73	0.204778	4.5
73	0.360185	9
73	0.306741	18
73	0.253519	36
74	0.0332593	0.28125
74	0.0526296	0.5625
74	0.0125926	1.12
74	0.135037	2.255
74	0.114963	4.5
74	0.239333	9
74	0.166148	18
74	0.40037	36
75	0.015037	0.28125
75	0.000777778	0.5625
75	0.0760741	1.12
75	0.075	2.255
75	0.189407	4.5
75	0.176519	9
75	0.25637	18
75	0.358259	36
76	0.0703704	0.28125
76	0.0474444	0.5625
76	0.0151111	1.12
76	0.0724444	2.255
76	0.0482963	4.5
76	0.465481	9
76	0.234481	18
76	0.350926	36
77	0.0258148	0.28125
77	0.0428148	0.5625
77	0.0246667	1.12
77	0.0262222	2.255
77	0.0285926	4.5
77	0.041037	9
77	0.0741111	18
77	0.0259259	36
78	0.0876296	0.28125
78	0.0917407	0.5625
78	0.150778	1.12
78	0.347185	2.255
78	0.425222	4.5
78	0.469407	9
78	0.59237	18
78	0.606222	36
79	0	0.28125
79	0.0717037	0.5625
79	0.0995556	1.12
79	0.144852	2.255
79	0.173926	4.5
79	0.460074	9
79	0.437667	18
79	0.628926	36
80	0.0373704	0.28125
80	0.0309259	0.5625
80	0.0976296	1.12
80	0.0892222	2.255
80	0.0556667	4.5
80	0.210963	9
80	0.153222	18
80	0.449481	36
81	0.0621111	0.28125
81	0.0264074	0.5625
81	0.0323333	1.12
81	0.0308519	2.255
81	0.111259	4.5
81	0.264815	9
81	0.140333	18
81	0.308296	36
82	0.0219259	0.28125
82	0.000666667	0.5625
82	0.0634074	1.12
82	0.0495185	2.255
82	0.0940741	4.5
82	0.207407	9
82	0.143556	18
82	0.327148	36
83	0.0566296	0.28125
83	0.0284074	0.5625
83	0.0622222	1.12
83	0.0682222	2.255
83	0.0634815	4.5
83	0.186852	9
83	0.20937	18
83	0.195963	36
84	0.0812593	0.28125
84	0.0515556	0.5625
84	0.0777037	1.12
84	0.283481	2.255
84	0.264667	4.5
84	0.365741	9
84	0.474222	18
84	0.514963	36
85	0.0438889	0.28125
85	0.0980741	0.5625
85	0.0904444	1.12
85	0.165593	2.255
85	0.237593	4.5
85	0.412852	9
85	0.401296	18
85	0.440963	36
86	0.060963	0.28125
86	0.0882222	0.5625
86	0.138852	1.12
86	0.029037	2.255
86	0.0899259	4.5
86	0.171111	9
86	0.195444	18
86	0.0576296	36
87	0	0.28125
87	0.0189259	0.5625
87	0.0437037	1.12
87	0.137667	2.255
87	0.223111	4.5
87	0.0822222	9
87	0.191074	18
87	0.226815	36
88	0.10663	0.28125
88	0.118037	0.5625
88	0.119778	1.12
88	0.172889	2.255
88	0.171926	4.5
88	0.286556	9
88	0.388704	18
88	0.479963	36
89	0.017	0.28125
89	0.0234444	0.5625
89	0.0508889	1.12
89	0.0177778	2.255
89	0.0764815	4.5
89	0.156704	9
89	0.051963	18
89	0.153222	36
90	0	0.28125
90	0.0257037	0.5625
90	0.0201852	1.12
90	0.0587037	2.255
90	0.139778	4.5
90	0.169593	9
90	0.217926	18
90	0.300259	36
91	0	0.28125
91	0.0277037	0.5625
91	0.00951852	1.12
91	0.0101481	2.255
91	0.0827037	4.5
91	0.0525185	9
91	0.0711481	18
91	0.0578889	36
92	0.0128148	0.28125
92	0.0257778	0.5625
92	0.0663704	1.12
92	0.0724815	2.255
92	0.225593	4.5
92	0.289444	9
92	0.18263	18
92	0.322704	36
93	0.0671852	0.28125
93	0.175222	0.5625
93	0.0874074	1.12
93	0.144259	2.255
93	0.106481	4.5
93	0.186852	9
93	0.131222	18
93	0.256963	36
94	0.047963	0.28125
94	0.0104815	0.5625
94	0.0172593	1.12
94	0.0484074	2.255
94	0.0394444	4.5
94	0.147111	9
94	0.207741	18
94	0.209407	36
95	0.100963	0.28125
95	0.0498148	0.5625
95	0.027	1.12
95	0.179333	2.255
95	0.103889	4.5
95	0.144778	9
95	0.38537	18
95	0.315593	36
96	0.100593	0.28125
96	0.0612593	0.5625
96	0.00837037	1.12
96	0.026	2.255
96	0.210481	4.5
96	0.131222	9
96	0.247667	18
96	0.305741	36
97	0.0558889	0.28125
97	0.0445926	0.5625
97	0.0777778	1.12
97	0.116296	2.255
97	0.333296	4.5
97	0.265889	9
97	0.305185	18
97	0.294963	36

## Sheet: Figure 1 FS1D
Figure 1 - figure supplement 1D
mosquito	behavior_prop	stimulus
0	0.0258889	0.28125
0	0.00737037	0.5625
0	0.0261481	1.12
0	0.00318519	2.255
0	0.0485185	4.5
0	0.0293333	9
0	0.235259	18
0	0.377148	36
1	0	0.28125
1	0.00125926	0.5625
1	0.0087037	1.12
1	0.018	2.255
1	0.0348148	4.5
1	0.0477778	9
1	0.125444	18
1	0.102593	36
2	0	0.28125
2	0.000222222	0.5625
2	0.0176667	1.12
2	0.0152963	2.255
2	0.039037	4.5
2	0.0503333	9
2	0.0232222	18
2	0.0465556	36
3	0.0548889	0.28125
3	0.00640741	0.5625
3	0.00951852	1.12
3	0.00503704	2.255
3	0.0282222	4.5
3	0.00755556	9
3	0.0238889	18
3	0.0501852	36
4	0.00916667	0.28125
4	0.0242593	0.5625
4	0.0291481	1.12
4	0.086963	2.255
4	0.271667	4.5
4	0.140185	9
4	0.302407	18
4	0.208444	36
5	0.00188889	0.28125
5	0.0120741	0.5625
5	0.0186667	1.12
5	0.0215926	2.255
5	0.0501852	4.5
5	0.092963	9
5	0.116407	18
5	0.126963	36
6	0	0.28125
6	0.00655556	0.5625
6	0	1.12
6	0.02	2.255
6	0.022	4.5
6	0.0201852	9
6	0.0985556	18
6	0.138259	36
7	0.00377778	0.28125
7	0.0182963	0.5625
7	0.0421481	1.12
7	0.0358519	2.255
7	0.0528519	4.5
7	0.126444	9
7	0.119519	18
7	0.131778	36
8	0.00938889	0.28125
8	0.0101852	0.5625
8	0.00933333	1.12
8	0.0149259	2.255
8	0.0531852	4.5
8	0.0435185	9
8	0.104926	18
8	0.133037	36
9	0.0214444	0.28125
9	0.008	0.5625
9	0.0162963	1.12
9	0.0251481	2.255
9	0.0192593	4.5
9	0.0193704	9
9	0.00637037	18
9	0.0194074	36
10	0.00177778	0.28125
10	0	0.5625
10	0.00544444	1.12
10	0.0174815	2.255
10	0.033	4.5
10	0.0107037	9
10	0.0433333	18
10	0.0697778	36
11	0.0182778	0.28125
11	0.00466667	0.5625
11	0.0217407	1.12
11	0.122148	2.255
11	0.157852	4.5
11	0.0395926	9
11	0.132926	18
11	0.223778	36
12	0.000333333	0.28125
12	0.0144444	0.5625
12	0.00325926	1.12
12	0.00314815	2.255
12	0.00718519	4.5
12	0.00825926	9
12	0.009	18
12	0.0218519	36
13	0.0163333	0.28125
13	0	0.5625
13	0.0444444	1.12
13	0.163222	2.255
13	0.0725185	4.5
13	0.134667	9
13	0.223333	18
13	0.434037	36
14	0.000444444	0.28125
14	0.000259259	0.5625
14	0	1.12
14	0.00118519	2.255
14	0.0097037	4.5
14	0.0196667	9
14	0.0237037	18
14	0.0241852	36
15	0.00537037	0.28125
15	0.000259259	0.5625
15	0.00225926	1.12
15	0.0528148	2.255
15	0.0221481	4.5
15	0.0457778	9
15	0.109074	18
15	0.122407	36
16	0	0.28125
16	0	0.5625
16	0.00692593	1.12
16	0.0148519	2.255
16	0.00474074	4.5
16	0.0087037	9
16	0.0251852	18
16	0.0147037	36
17	0.00144444	0.28125
17	0.00344444	0.5625
17	0.000740741	1.12
17	0.0394074	2.255
17	0.0144815	4.5
17	0.0690741	9
17	0.111481	18
17	0.0841111	36
18	0	0.28125
18	0.00774074	0.5625
18	0.000592593	1.12
18	0.00562963	2.255
18	0.00451852	4.5
18	0.00537037	9
18	0.00185185	18
18	0.0188148	36
19	0.00262963	0.28125
19	0.0281111	0.5625
19	0.0767778	1.12
19	0.12763	2.255
19	0.0649259	4.5
19	0.114148	9
19	0.196074	18
19	0.209074	36
20	0.0502963	0.28125
20	0.000592593	0.5625
20	0.00725926	1.12
20	0.0390741	2.255
20	0.0258148	4.5
20	0.062963	9
20	0.0851111	18
20	0.0714444	36
21	0	0.28125
21	0.00211111	0.5625
21	0.00833333	1.12
21	0.0220741	2.255
21	0.0251111	4.5
21	0.0283704	9
21	0.0201852	18
21	0.0500741	36
22	0.0327778	0.28125
22	0.0147407	0.5625
22	0.0711852	1.12
22	0.0335185	2.255
22	0.118333	4.5
22	0.10863	9
22	0.162556	18
22	0.25763	36
23	0.000333333	0.28125
23	0	0.5625
23	0	1.12
23	0.0168519	2.255
23	0.00477778	4.5
23	0.0178889	9
23	0.00259259	18
23	0.0166667	36
24	0.00474074	0.28125
24	0.00118519	0.5625
24	0.0103333	1.12
24	0.0173704	2.255
24	0.0172222	4.5
24	0.0241111	9
24	0.151593	18
24	0.122741	36
25	0	0.28125
25	0.00944444	0.5625
25	0.00874074	1.12
25	0.0106296	2.255
25	0.0355926	4.5
25	0.0882593	9
25	0.0911852	18
25	0.111	36
26	0.0188889	0.28125
26	0.0516667	0.5625
26	0.00788889	1.12
26	0.0137407	2.255
26	0.0192963	4.5
26	0.0281111	9
26	0.0377407	18
26	0.0131111	36
27	0.00292593	0.28125
27	0.000518519	0.5625
27	0.00640741	1.12
27	0.00514815	2.255
27	0.0109259	4.5
27	0.0274444	9
27	0.0125185	18
27	0.0452593	36
28	0.00185185	0.28125
28	0.00437037	0.5625
28	0.00314815	1.12
28	0.00466667	2.255
28	0.039037	4.5
28	0.102111	9
28	0.0921481	18
28	0.131296	36
29	0.00188889	0.28125
29	0.00251852	0.5625
29	0	1.12
29	0.00666667	2.255
29	0.00585185	4.5
29	0.00562963	9
29	0.00455556	18
29	0.0192963	36
30	0.000777778	0.28125
30	0.00037037	0.5625
30	0.00155556	1.12
30	0.0137778	2.255
30	0.00181481	4.5
30	0.00377778	9
30	0.00337037	18
30	0.017	36
31	0.0234444	0.28125
31	0.00340741	0.5625
31	0.00651852	1.12
31	0.0107407	2.255
31	0.00414815	4.5
31	0.00596296	9
31	0.00518519	18
31	0.0133333	36
32	0.00237037	0.28125
32	0.0077037	0.5625
32	0.00385185	1.12
32	0.00562963	2.255
32	0.00377778	4.5
32	0.0144815	9
32	0.02	18
32	0.00977778	36
33	0.00355556	0.28125
33	0.0121481	0.5625
33	0.0111481	1.12
33	0.032037	2.255
33	0.0336667	4.5
33	0.0582963	9
33	0.017963	18
33	0.0986296	36
34	0.00944444	0.28125
34	0.00522222	0.5625
34	0.00192593	1.12
34	0.0102222	2.255
34	0.0115926	4.5
34	0.0214074	9
34	0.0326296	18
34	0.0338519	36
35	0.00162963	0.28125
35	0.00585185	0.5625
35	0.00437037	1.12
35	0.00414815	2.255
35	0.00896296	4.5
35	0.00803704	9
35	0.0165185	18
35	0.0246296	36
36	0.00062963	0.28125
36	0	0.5625
36	0.00292593	1.12
36	0.00214815	2.255
36	0.0142222	4.5
36	0.025	9
36	0.00218519	18
36	0.019037	36
37	0.0117407	0.28125
37	0.0458148	0.5625
37	0.0458889	1.12
37	0.00637037	2.255
37	0.0195185	4.5
37	0.0896667	9
37	0.012	18
37	0.0923704	36
38	0.00555556	0.28125
38	0.000518519	0.5625
38	0.00322222	1.12
38	0.014963	2.255
38	0.00396296	4.5
38	0.00555556	9
38	0.00911111	18
38	0.0082963	36
39	0.00355556	0.28125
39	0.00340741	0.5625
39	0.00918519	1.12
39	0.00292593	2.255
39	0.00892593	4.5
39	0.00507407	9
39	0.00418519	18
39	0.015037	36
40	0	0.28125
40	0.00144444	0.5625
40	0.00962963	1.12
40	0.0109259	2.255
40	0.00562963	4.5
40	0.00588889	9
40	0.00611111	18
40	0.0198889	36
41	0.00522222	0.28125
41	0.0123704	0.5625
41	0.00692593	1.12
41	0.00366667	2.255
41	0.0062963	4.5
41	0.0198889	9
41	0.0654815	18
41	0.0551852	36
42	0.0630741	0.28125
42	0.00266667	0.5625
42	0.00751852	1.12
42	0.00203704	2.255
42	0.00914815	4.5
42	0.0184074	9
42	0.0280741	18
42	0.0458148	36
43	0.00037037	0.28125
43	0.00440741	0.5625
43	0.0128519	1.12
43	0.0132222	2.255
43	0.0257037	4.5
43	0.0352963	9
43	0.0392222	18
43	0.0359259	36
44	0.0197407	0.28125
44	0.0017037	0.5625
44	0.0022963	1.12
44	0.00618519	2.255
44	0.0135926	4.5
44	0.0188148	9
44	0.0443333	18
44	0.059963	36
45	0.00655556	0.28125
45	0.00818519	0.5625
45	0.0192222	1.12
45	0.00103704	2.255
45	0.0521852	4.5
45	0.0102963	9
45	0.00037037	18
45	0.0354815	36
46	0.002	0.28125
46	0.002	0.5625
46	0.0151111	1.12
46	0.00603704	2.255
46	0.0368148	4.5
46	0.00277778	9
46	0.0165926	18
46	0.0615185	36
47	0.0104444	0.28125
47	0.00248148	0.5625
47	0.0155185	1.12
47	0.0180741	2.255
47	0.00255556	4.5
47	0.00333333	9
47	0.00992593	18
47	0.160593	36
48	0.0151852	0.28125
48	0.00462963	0.5625
48	0.0288889	1.12
48	0.0131852	2.255
48	0.000481481	4.5
48	0.00937037	9
48	0.0157037	18
48	0.0578889	36
49	0.00181481	0.28125
49	0.00274074	0.5625
49	0.00425926	1.12
49	0.00237037	2.255
49	0.0314074	4.5
49	0.0092963	9
49	0.0408519	18
49	0.0535185	36
50	0.00248148	0.28125
50	0.0268519	0.5625
50	0.0405556	1.12
50	0.0443704	2.255
50	0.114519	4.5
50	0.0556667	9
50	0.0735185	18
50	0.0843704	36
51	0.00181481	0.28125
51	0.00511111	0.5625
51	0.0317778	1.12
51	0.0271111	2.255
51	0.0211852	4.5
51	0.0072963	9
51	0.0355556	18
51	0.103667	36
52	0.0251481	0.28125
52	0.0779259	0.5625
52	0.0727037	1.12
52	0.05	2.255
52	0.0788148	4.5
52	0.0125926	9
52	0.0318148	18
52	0.0907778	36
53	0	0.28125
53	0.00114815	0.5625
53	0.0109259	1.12
53	0	2.255
53	0.00125926	4.5
53	0.0163333	9
53	0.06	18
53	0.0456667	36
54	0.0145185	0.28125
54	0.000518519	0.5625
54	0.0172222	1.12
54	0.00251852	2.255
54	0.0106296	4.5
54	0.0181852	9
54	0.00374074	18
54	0.00355556	36
55	0.00733333	0.28125
55	0.00755556	0.5625
55	0.00522222	1.12
55	0.00877778	2.255
55	0.0703333	4.5
55	0.00811111	9
55	0.0657778	18
55	0.0715185	36
56	0.00159259	0.28125
56	0	0.5625
56	0.0027037	1.12
56	0.00288889	2.255
56	0.00959259	4.5
56	0.0122963	9
56	0.0244074	18
56	0.00614815	36
57	0.0199259	0.28125
57	0.00962963	0.5625
57	0.00781481	1.12
57	0.0177037	2.255
57	0.0179259	4.5
57	0.0574815	9
57	0.0543333	18
57	0.0711111	36
58	0.00488889	0.28125
58	0.0335926	0.5625
58	0.00781481	1.12
58	0.0147037	2.255
58	0.00622222	4.5
58	0.0161481	9
58	0.0294815	18
58	0.0226667	36
59	0.0214444	0.28125
59	0.0524074	0.5625
59	0.0688889	1.12
59	0.0795185	2.255
59	0.106111	4.5
59	0.195444	9
59	0.155519	18
59	0.191407	36
60	0.00485185	0.28125
60	0.0173704	0.5625
60	0.0141111	1.12
60	0.0229259	2.255
60	0.0162963	4.5
60	0.0257778	9
60	0.0272593	18
60	0.0208519	36
61	0.00255556	0.28125
61	0.001	0.5625
61	0.00314815	1.12
61	0.00107407	2.255
61	0.0257037	4.5
61	0.0264074	9
61	0.0741111	18
61	0.125704	36
62	0.002	0.28125
62	0.00214815	0.5625
62	0.0113704	1.12
62	0.0121111	2.255
62	0.0343333	4.5
62	0.0731111	9
62	0.037037	18
62	0.0452222	36
63	0.0457037	0.28125
63	0.0138519	0.5625
63	0.0267407	1.12
63	0.0338148	2.255
63	0.0832222	4.5
63	0.114593	9
63	0.0993704	18
63	0.115074	36
64	0.000555556	0.28125
64	0.00325926	0.5625
64	0.00266667	1.12
64	0.0274074	2.255
64	0.0184074	4.5
64	0.0402963	9
64	0.143185	18
64	0.142407	36
65	0.0122222	0.28125
65	0.0166667	0.5625
65	0.0082963	1.12
65	0.0128148	2.255
65	0.0132963	4.5
65	0.0358889	9
65	0.0277037	18
65	0.026	36
66	0.00455556	0.28125
66	0.0128519	0.5625
66	0.0348519	1.12
66	0.0257037	2.255
66	0.0257778	4.5
66	0.0220741	9
66	0.0527037	18
66	0.071037	36
67	0.00359259	0.28125
67	0.00240741	0.5625
67	0	1.12
67	0.0272593	2.255
67	0.0112593	4.5
67	0.0277778	9
67	0.0211111	18
67	0.0262963	36
68	0.00540741	0.28125
68	0.00466667	0.5625
68	0.00459259	1.12
68	0.0138889	2.255
68	0.0366296	4.5
68	0.0164074	9
68	0.138481	18
68	0.0257407	36
69	0.00740741	0.28125
69	0.00444444	0.5625
69	0.00807407	1.12
69	0.008	2.255
69	0.0545926	4.5
69	0.0531481	9
69	0.0367037	18
69	0.0545926	36
70	0.000666667	0.28125
70	0.000925926	0.5625
70	0.00751852	1.12
70	0	2.255
70	0.0907407	4.5
70	0.024963	9
70	0.0266667	18
70	0.0285556	36
71	0.0407407	0.28125
71	0.0730741	0.5625
71	0.154741	1.12
71	0.0901111	2.255
71	0.113926	4.5
71	0.135741	9
71	0.158444	18
71	0.133444	36
72	0.00618519	0.28125
72	0.00348148	0.5625
72	0.0893704	1.12
72	0.0477407	2.255
72	0.108815	4.5
72	0.0741852	9
72	0.179519	18
72	0.216481	36
73	0.00548148	0.28125
73	0.000777778	0.5625
73	0.00107407	1.12
73	0.016963	2.255
73	0.0488889	4.5
73	0.0796296	9
73	0.0421111	18
73	0.0713333	36
74	0.00533333	0.28125
74	0.00337037	0.5625
74	0.00407407	1.12
74	0.0092963	2.255
74	0.0125556	4.5
74	0.0437037	9
74	0.0191481	18
74	0.0779259	36
75	0.00566667	0.28125
75	0.00344444	0.5625
75	0.0122963	1.12
75	0.0153333	2.255
75	0.0428889	4.5
75	0.0543333	9
75	0.0685556	18
75	0.127481	36
76	0.00188889	0.28125
76	0.00414815	0.5625
76	0.000925926	1.12
76	0.00903704	2.255
76	0.0208889	4.5
76	0.0972963	9
76	0.0600741	18
76	0.18263	36
77	0.00244444	0.28125
77	0.00459259	0.5625
77	0.00922222	1.12
77	0.00311111	2.255
77	0.00362963	4.5
77	0.0067037	9
77	0.0072963	18
77	0.00314815	36
78	0.0125185	0.28125
78	0.00492593	0.5625
78	0.0237037	1.12
78	0.0521852	2.255
78	0.0652963	4.5
78	0.0775185	9
78	0.246296	18
78	0.160926	36
79	0	0.28125
79	0.045963	0.5625
79	0.0138148	1.12
79	0.0488148	2.255
79	0.0449259	4.5
79	0.208852	9
79	0.155111	18
79	0.276222	36
80	0.00140741	0.28125
80	0.00662963	0.5625
80	0.0111111	1.12
80	0.0162222	2.255
80	0.0103333	4.5
80	0.0504074	9
80	0.0214815	18
80	0.152259	36
81	0.0052963	0.28125
81	0.00177778	0.5625
81	0.0214815	1.12
81	0.0115926	2.255
81	0.0145926	4.5
81	0.0547037	9
81	0.0465185	18
81	0.0754444	36
82	0.0342593	0.28125
82	0.00481481	0.5625
82	0.0113333	1.12
82	0.003	2.255
82	0.051	4.5
82	0.0510741	9
82	0.0590741	18
82	0.144889	36
83	0.00862963	0.28125
83	0.00540741	0.5625
83	0.00237037	1.12
83	0.00851852	2.255
83	0.00974074	4.5
83	0.0125556	9
83	0.0765556	18
83	0.0294444	36
84	0.0118889	0.28125
84	0.0162963	0.5625
84	0.00611111	1.12
84	0.135778	2.255
84	0.100815	4.5
84	0.134148	9
84	0.102778	18
84	0.166259	36
85	0.006	0.28125
85	0.017963	0.5625
85	0.00633333	1.12
85	0.0448148	2.255
85	0.041037	4.5
85	0.136222	9
85	0.174222	18
85	0.148148	36
86	0.106222	0.28125
86	0.0251481	0.5625
86	0.0308148	1.12
86	0.000666667	2.255
86	0.0125556	4.5
86	0.0288148	9
86	0.0218519	18
86	0.00437037	36
87	0.000518519	0.28125
87	0.00196296	0.5625
87	0.00781481	1.12
87	0.0545556	2.255
87	0.074037	4.5
87	0.0157778	9
87	0.0916296	18
87	0.0714074	36
88	0.0116296	0.28125
88	0.0117778	0.5625
88	0.0213333	1.12
88	0.022963	2.255
88	0.0227037	4.5
88	0.198889	9
88	0.126222	18
88	0.109519	36
89	0.000296296	0.28125
89	0.00207407	0.5625
89	0.00396296	1.12
89	0.00262963	2.255
89	0.0092963	4.5
89	0.0491852	9
89	0.0114444	18
89	0.0177778	36
90	0.00840741	0.28125
90	0.00214815	0.5625
90	0.012037	1.12
90	0.00659259	2.255
90	0.0458889	4.5
90	0.0217037	9
90	0.0400741	18
90	0.0208519	36
91	0	0.28125
91	0.0291852	0.5625
91	0.00125926	1.12
91	0.0500741	2.255
91	0.0722593	4.5
91	0.0353333	9
91	0.0425185	18
91	0.0106296	36
92	0.001	0.28125
92	0.00314815	0.5625
92	0.00707407	1.12
92	0.00774074	2.255
92	0.0756296	4.5
92	0.138667	9
92	0.0277778	18
92	0.096	36
93	0.00825926	0.28125
93	0.0115556	0.5625
93	0.0105185	1.12
93	0.0731481	2.255
93	0.0206296	4.5
93	0.0638148	9
93	0.0264444	18
93	0.0861481	36
94	0.0129259	0.28125
94	0.00288889	0.5625
94	0.00374074	1.12
94	0.00581481	2.255
94	0.00637037	4.5
94	0.00588889	9
94	0.0082963	18
94	0.0353333	36
95	0.00540741	0.28125
95	0.00488889	0.5625
95	0.00733333	1.12
95	0.0236667	2.255
95	0.044	4.5
95	0.0384444	9
95	0.149667	18
95	0.151037	36
96	0.0192222	0.28125
96	0.0346296	0.5625
96	0.0022963	1.12
96	0.0248519	2.255
96	0.0851111	4.5
96	0.048037	9
96	0.226593	18
96	0.214037	36
97	0.0097037	0.28125
97	0.00433333	0.5625
97	0.0157407	1.12
97	0.0145556	2.255
97	0.0455185	4.5
97	0.0611852	9
97	0.0651111	18
97	0.0602593	36

## Sheet: Statistics
Statistical analysis in Figure 1 and Figure 1 - figure supplement 1
Figure 1I
Genotype	n	Statistical test	P value
Gr3-QF2	70	Wilcoxon signed rank test	0.375291
QUAS-CsChrimon	70	Wilcoxon signed rank test	0.109472
Gr3 > CsChrimson	70	Wilcoxon signed rank test	6.26945e-12
Figure 1L Gr3
Stimulus	n	Statistical test	P value
CO2	7	Kruskal Wallis	0.008241
Light	7
None	7
Nemenyi Posthoc test
	CO2	Light
Light	0.026
None	0.018	0.991
Figure 1L CsChrimson
Stimulus	n	Statistical test	P value
CO2	7	Kruskal Wallis	0.0007258
Light	7
None	6
Nemenyi Posthoc test
	CO2	Light
Light	0.0045
None	0.0067	1
Figure 1L Gr3>CsChrimson
Stimulus	n	Statistical test	P value
CO2	7	Kruskal Wallis	0.00318
Light	7
None	7
Nemenyi Posthoc test
	CO2	Light
Light	0.9366
None	0.0172	0.0059
Figure 1M Gr3
Stimulus	n	Statistical test	P value
CO2	7	Kruskal Wallis	0.0009503
Light	7
None	7
Nemenyi Posthoc test
	CO2	Light
Light	0.0033
None	0.0059	0.9838
Figure 1M CsChrimson
Stimulus	n	Statistical test	P value
CO2	7	Kruskal Wallis	0.0002678
Light	7
None	7
Nemenyi Posthoc test
	CO2	Light
Light	0.0044
None	0.0044	1
Figure 1M Gr3>CsChrimson
Stimulus	n	Statistical test	P value
CO2	7	Kruskal Wallis	0.000837
Light	7
None	7
Nemenyi Posthoc test
	CO2	Light
Light	0.692
None	0.016	0.001
Figure 1 FS1C
Genotype	n	Statistical test	P value
Gr3>CsChrimson	98	Friedman	1.12939e-85
Nemenyi Posthoc test
	0.28125	0.5625	1.12	2.255	4.5	9	18	36
0.28125	1	0.9	0.003964	0.001	0.001	0.001	0.001	0.001
0.5625	0.9	1	0.198004	0.001	0.001	0.001	0.001	0.001
1.12	0.003964	0.198004	1	0.398389	0.001	0.001	0.001	0.001
2.255	0.001	0.001	0.398389	1	0.087711	0.001	0.001	0.001
4.5	0.001	0.001	0.001	0.087711	1	0.231329	0.001872	0.001
9	0.001	0.001	0.001	0.001	0.231329	1	0.755447	0.004688
18	0.001	0.001	0.001	0.001	0.001872	0.755447	1	0.360458
36	0.001	0.001	0.001	0.001	0.001	0.004688	0.360458	1
Figure 1 FS1D
Genotype	n	Statistical test	P value
Gr3>CsChrimson	98	Friedman	3.55219e-73
Nemenyi Posthoc test
	0.28125	0.5625	1.12	2.255	4.5	9	18	36
0.28125	1	0.9	0.252693	0.001	0.001	0.001	0.001	0.001
0.5625	0.9	1	0.28352	0.001	0.001	0.001	0.001	0.001
1.12	0.252693	0.28352	1	0.369815	0.001	0.001	0.001	0.001
2.255	0.001	0.001	0.369815	1	0.146871	0.001	0.001	0.001
4.5	0.001	0.001	0.001	0.146871	1	0.260212	0.004952	0.001
9	0.001	0.001	0.001	0.001	0.260212	1	0.868767	0.003345
18	0.001	0.001	0.001	0.001	0.004952	0.868767	1	0.210958
36	0.001	0.001	0.001	0.001	0.001	0.003345	0.210958	1
