# Supplementary material for: A persistent behavioral state enables sustained predation of humans by mosquitoes
Source: eLife. 2022 May 12;11:e76663. doi: 10.7554/eLife.76663 (PMC9154740; doi:10.7554/eLife.76663)
Supplement: Figure 2—source data 1. [file elife-76663-fig2-data1.xlsx]

## Sheet: Figure 2C
Figure 2C
Female Opto-thermocycler Classifier
Error by percentile (px)
	50	75	90
Proboscis Tip	1.4	3.6	7.4
Proboscis Base	0.7	1.4	3.9
Abdomen Tip	0.8	1.2	2.2
Tibia-Tarsomere (L)	1.6	4.2	13.9
Femur-Tibia (L)	0.8	1.6	5.2
Body-Femur (L)	0.6	0.9	3
Tibia-Tarsomere (R)	1.8	4.7	12.7
Femur-Tibia (R)	0.7	1.6	5.1
Body-Femur (R)	0.6	1	1.9
Male Opto-thermocycler Classifier
Error by percentile (px)
	50	75	90
Proboscis Tip	1.1	2.1	4.1
Proboscis Base	1.2	1.7	3.3
Abdomen Tip	0.8	1.1	1.7
Tibia-Tarsomere (L)	2.4	6.5	10.6
Femur-Tibia (L)	1.2	2.6	5.7
Body-Femur (L)	0.7	1.1	2.4
Tibia-Tarsomere (R)	4.4	8.3	11
Femur-Tibia (R)	1	2.1	6
Body-Femur (R)	0.7	1.1	2.6
Female Opto-Feeder Classifier
Error by percentile (px)
	50	75	90
Proboscis Tip	2.9	6.3	59.9
Proboscis Base	1.1	4.2	37.3
Abdomen Tip	0.9	1.7	35.4
Tibia-Tarsomere (L)	1.5	4.5	32.5
Femur-Tibia (L)	1.2	4.9	30.3
Body-Femur (L)	1.1	4.6	31.5
Tibia-Tarsomere (R)	1.1	2.9	34.5
Femur-Tibia (R)	2.1	6.3	26.2
Body-Femur (R)	1.6	5.4	24.1
First Abdominal Segment (L)	1.4	3.1	11.7
First Abdominal Segment (R)	1.3	2.7	11.4
Abdominal Midpoint (L)	1.4	2.6	21.3
Abdominal Midpoint (R)	1.3	2.6	20.7
JAABA Classifiers
Classification of Females
	True positives	False negatives	True negatives	False positives		Features	Window radius	Filtering	Minimum bout length	n videos
groom3	0.951	0.049	0.924	0.076		APT, Appearance, locomotion	custom	3	6	5
fly2	0.923	0.077	0.993	0.007		Appearance, locomotion	10	-	0	2
walk3	0.953	0.043	0.951	0.049		APT, Appearance, locomotion	custom	3	5	4
probe5	0.916	0.084	0.931	0.069		APT, Appearance, locomotion	custom	3	6	5
groomBB	0.841	0.159	0.844	0.156		APT, Appearance, locomotion	custom	-	5	4
walkBB	0.969	0.031	0.956	0.044		APT, Appearance, locomotion	custom	-	5	2
probeBB	0.911	0.089	0.964	0.036		APT, Appearance, locomotion	custom	-	5	4
Classification of Males
groommale	0.966	0.034	0.861	0.139		APT, Appearance, locomotion	custom	5	5	3
fly2	0.97	0.03	0.995	0.005		Appearance, locomotion	10	-	0	2
walk3	0.923	0.077	0.946	0.054		APT, Appearance, locomotion	custom	3	5	4
probemale	0.873	0.127	0.914	0.086		APT, Appearance, locomotion	custom	2	5	7

## Sheet: Figure 2E
Figure 2E
Wildtype (Liverpool) heat
mosquito 1
tracking gap starts:
tracking gap stops:
groom3 starts	-48.7	16.0667
groom3 stops	-48.3	16.6667
walk3 starts	12.8667	25.1333	27.0667	29.6333	38.1667	42.8667	52.4667	53.1	58.6667	64.1	66.5333	69.6	80.3333	82.9	94.5667	108.967	116.033
walk3 stops	13.4333	25.3	27.3	37.5667	40.6667	45.8333	52.7667	55.0333	62.0333	64.8	66.7667	77.0333	80.5333	92.7	108.233	114.833	120.033
probe5 starts	1.43333	2.63333	13.8	22.7667	26.2667	30.1333	31.5	47.6	53.2333	56.8667	75.3	78.6667	95.5667	99.6667	105.467	114.567	118.667	119.2
probe5 stops	2.06667	13.0667	22.0667	25.3667	27.8333	30.4	46.9	50.7333	54.2333	57.1	78.2667	80.3333	95.9667	100.3	106.1	115.033	118.9	119.467
fly2 starts
fly2 stops
mosquito 2
tracking gap starts:
tracking gap stops:
groom3 starts	-59.6	-56.6333	-54.9	-53.1	-51.2333	-49.5667	-41.9	-40.5667	-38.0333	-37.4667	-35.4667	-33.3667	-29.7333	-22.9	-22.5	-19.0333	-18.1667	-12.0667	-9.4	-4.86667	-3.2	-0.966667	2.56667	3.13333	8.86667	22.0333	23.5	29.6333	30.4	30.9667	31.4667	35.5333	36	38.2333	40.9667	44.0667	49.6333	50.2667	51.8333	55.9667	62.3333	64.8	65.2667	66.6667	67.1	67.9333	68.7	69.4333	71.2667
groom3 stops	-59.1667	-55.3667	-53.3333	-52.8667	-50.2333	-42.1667	-40.8	-38.2667	-37.7667	-37.1667	-34.0333	-31	-23.4333	-22.7	-21.0333	-18.8333	-12.7333	-9.73333	-5.8	-3.73333	-1.73333	-0.566667	2.83333	3.5	9.6	22.4667	24	29.8333	30.7333	31.1667	33.6333	35.7333	37.9667	40.4667	42.9667	44.3	49.9667	51.2	52.3333	61.5667	64.4667	65	65.8667	66.9	67.7	68.5	68.9667	70.8667	71.4667
walk3 starts
walk3 stops
probe5 starts	-55.3667	-52.6667	-51.4	-48.0333	-47.4	-46.5667	-40.9667	-37.7333	-33.5	-26.1	-22.8333	-18.8333	-11	-9.8	-9.16667	0.533333	2.53333	3.93333	5.13333	8	11.9333	12.7667	34.3	35.9667	45.5667	47.6	48.9333	50.5333	51.8667	53.2	54.6333	57.0667	58.0333	59.7667	61.0667	61.8333	63.3667	64.8333	65.5667	70.6	72.9	73.7	74.5333	76.6333	77.3667	78.8	81.0667	82.1667	87.8667
probe5 stops	-54.7667	-52.2	-51.1	-47.8	-46.7667	-46.3667	-40.5667	-37.3333	-33.2667	-25.7667	-22.4667	-18.2	-10.6333	-9.46667	-8.8	1.7	3.26667	4.16667	6.36667	9.16667	12.4	13.7	34.7667	36.4667	45.8667	48.7333	49.5	50.8	52.0667	53.8	56.6667	57.8333	58.9333	60.1333	61.3333	62.0667	63.6667	65.3	65.9667	71.2333	73.5	74.3	75.6667	77.0667	77.5667	79.3667	81.5	82.8667	89.0667
fly2 starts
fly2 stops
mosquito 3
tracking gap starts:
tracking gap stops:
groom3 starts	-60	1.03333	7.13333	8.2	10.7	12.5333	26.3667	30.5667
groom3 stops	0.433333	1.66667	7.6	8.56667	10.9667	13.0667	26.6667	30.7667
walk3 starts	36.5667
walk3 stops	39.3
probe5 starts	-0.466667	1.36667	2.73333	5.6	19.5333	21.3333	35.6667
probe5 stops	0.433333	2.26667	4.83333	18.5333	20.5	32.8	39.3
fly2 starts
fly2 stops
mosquito 4
tracking gap starts:
tracking gap stops:
groom3 starts	-56.9	-9.93333	-3.36667	24.7	64.0333
groom3 stops	-56.6333	-3.7	-3.03333	24.9667	64.2667
walk3 starts	-20.3667	3.13333	5.43333	10.8	13.7	25.1	25.7333	35.5333	36.4667	38.7	39.8	44.7333	49.3	52.5333	53.5333	58.8	61.4333	62.3667	68.9667	70.8333	72.2667	75.5	78.1	83.1333	91.7	92.5	96.0333	102.433	109.2	112.1
walk3 stops	-19.7667	3.3	7.16667	12.7667	24.9	25.4	34.4	35.9667	37.2667	38.9333	44.1	45.9333	52.2667	53.1333	54.8333	58.9667	62.0333	64.1	70.6333	71.8333	74.2	76.5333	81.7	91.2333	92.3333	93.9667	98.9667	105.733	111.233	113.133
probe5 starts	-40.8333	6.76667	8.73333	11.9	14	17.9667	23.3667	27.7	30.1	35.3	41.0333	43.8	69.6667	70.3
probe5 stops	-40.5667	8.5	9.93333	13.6667	17.4333	23.1	26.4333	28.8667	31	37.4667	41.4667	44	69.9667	70.8
fly2 starts	67.4333	76.5667	94
fly2 stops	67.6667	76.7333	94.4333
mosquito 5
tracking gap starts:
tracking gap stops:
groom3 starts	-4.73333	0.3	20.8667	101.833	111.833
groom3 stops	-3.7	0.733333	21.1	102.433	112.033
walk3 starts	32.1333	35.4667	35.8333	43.2	44.5	64.2667	94.9333	99.8	117.867	119.133
walk3 stops	33.0333	35.6333	36.4667	44	44.8	64.5333	95.9333	99.9667	118.833	119.567
probe5 starts	-7.8	2.43333	5.3	9.4	18.5333	20.9	22.5333	30.6667
probe5 stops	-6.66667	4.2	5.73333	17.0667	19.7667	21.2333	26.2333	32.4667
fly2 starts
fly2 stops
mosquito 6
tracking gap starts:
tracking gap stops:
groom3 starts	4.73333	28.5
groom3 stops	5.06667	28.8
walk3 starts	1.53333	3.76667	4.63333	7.23333	9.83333	10.4333	12.2667	14.5	15.8	38.1667	38.6333	48.3333	53.2667	56.4667	70.0333
walk3 stops	2.13333	4	6.63333	8.36667	10.2	11.8667	13.3333	15.6333	16.1333	38.3667	44.0667	48.5667	54.8333	60.4333	70.4333
probe5 starts	1.93333	15.8667
probe5 stops	15.4	16.1667
fly2 starts
fly2 stops
mosquito 7
tracking gap starts:
tracking gap stops:
groom3 starts	-60	-57.7333	-56.7667	-53.3	-44.3667	-42.6333	-41.8	-40.1333	-37.8	-31.1333	-28.1	-24.8667	-22.3	-21.0667	-19.3333	-17.6667	-11.6333	-6.33333	-3.23333	-1.1	-0.666667	1.26667	3.4	5.1	8.43333	10.2667	11.3	13	13.9333	18.1	21	22.4667	24.3667	27.2667	28.1667	34.9667	39.3333	42.0333	46.7667	47.3	48.4667	49.0667	54.4333	57.4333	58.2	62.6	63.5667	71.1	73.1667
groom3 stops	-58.1667	-57.4667	-55.7667	-51.8333	-42.8333	-42.0667	-40.4333	-39.9	-37.5	-29.5333	-26.9667	-22.6	-21.2667	-20.8667	-18.4333	-14	-7.96667	-3.46667	-1.46667	-0.9	0.466667	1.66667	4.9	6.36667	9.26667	10.7	11.5	13.6667	14.5333	19.5333	21.8333	22.9333	27.0667	27.5667	29.9333	37.8333	39.9	46.5667	46.9667	47.5667	48.8667	51.0667	56.5	57.9333	58.5	63.3	64.1667	72.4	73.6667
walk3 starts	-60	-55.2	-47.2667	-44.2	0.9	7.93333	32.5333	36.0667	46.4	47.0333	48.3667	49.6	50.5667	55.6333	56.3	56.8	57.2	64.0333	70.3	76.1	82.3333	89.5	97.5333	102.367	103	104.467	109.067	110.067
walk3 stops	-55.5	-51.5	-44.4	-41.6	1.16667	10.8667	34.9667	46.1333	46.6667	47.7333	48.9333	49.8667	55.1	55.9333	56.4667	56.9667	57.5333	68.0333	75.6	81.2667	84.9	96.8	102	102.733	104	106.533	109.433	115.5
probe5 starts	-60	-55.6	-52.8667	-46	-42.1333	-41.3	-0.233333	0.266667	1.2	2	39.2333	42.5333	46.1333	51.4	54.9333	73.7667	93.2667	96.4333	99.1	100.1	104.8	113
probe5 stops	-59.9333	-54.8333	-51.5	-45.6333	-41.9333	-40.8333	-0.0333333	0.766667	1.4	2.6	39.8	43.6	46.6333	51.6333	56	74.7	94.2667	96.8333	99.9	100.5	105.467	113.333
fly2 starts	-52.9	-0.333333	34.5	34.6	34.7667	55.1	83.9333	84	84.7333	104.467
fly2 stops	-51.6333	1.53333	34.5333	34.7333	34.8	56.3333	83.9667	84.6333	84.7667	105.167
mosquito 8
tracking gap starts:
tracking gap stops:
groom3 starts	-24.8667	-5.46667	71.5667	77.9333	118.833
groom3 stops	-24.4333	-4.6	72.4333	78.8333	119.067
walk3 starts	-59.7	-57.6667	-55.6333	-36.2333	-29.5667	-14.7333	-8.9	-1.73333	1.4	5.3	6.1	8.06667	25.3667	36.6667	45.8333	49.4	57.4667	66.8	70.1	76.7333	77.1333	79.0333	81	83.2	83.8	86.3	87.0333	89	92.6	93.8667	94.3667	97.4333	100.433	104.1	111.233	115.267	116.233	117.6
walk3 stops	-59.5333	-55.8	-52.5333	-30.7667	-29.1667	-13.6333	-8.73333	-1.06667	3.43333	5.5	6.3	24.4667	35.5333	43.1333	46.0333	57.2667	66.5667	69.7333	73.4	76.9	78.8	79.5	81.7667	83.6	84.0333	86.5333	87.6	91.0333	93.6667	94.1333	96.7667	100.2	100.6	108.5	114.9	116	117.4	118.4
probe5 starts	5.5	11.4	14.2	25.1667	50	52.7	113.167
probe5 stops	11.2	13.9667	15.4	25.4333	50.3	53.7667	113.867
fly2 starts	-58.7333	4.23333	116.9
fly2 stops	-58.5667	4.3	117.067
mosquito 9
tracking gap starts:
tracking gap stops:
groom3 starts	-58.8333	-57.9667	-41.9667	-25.4	-22.9333	-16.7333	-15.0333	-14.3333	-13.6667	-11.8	7.6	8.86667	11.8333
groom3 stops	-58.4	-42.4	-28.4	-24.3333	-17.6	-16.2	-14.7667	-13.9333	-13.3667	-11.4	8	9.46667	12.4
walk3 starts	-7.8	-4.46667	12.7	29.1333	59	88.4333	94.4667
walk3 stops	-6.96667	0.966667	14.8667	29.7333	59.2	88.9667	94.7333
probe5 starts	-6.83333	-3.8	4.46667	7.36667	11.6333
probe5 stops	-6.4	0.4	4.76667	10.4333	13.9
fly2 starts
fly2 stops
mosquito 10
tracking gap starts:
tracking gap stops:
groom3 starts	34.4667	59.5	86.4	87.2667	87.9	94.6667	108.733
groom3 stops	34.7	59.7	86.8667	87.5667	88.3	94.8667	109.2
walk3 starts	-46.4667	-34.9	-30.3333	-27.2667	-17.1333	-15.5333	-9.86667	2
walk3 stops	-45.8	-34.6667	-30.0667	-27.1	-16.9667	-15.1	-9.7	2.16667
probe5 starts	-59	-50.5333	-49.7667	-47.0333	-42.3333	-39.5667	-38.6333	-36.7333	-33.5667	-28.3	-20.6667	-20.1333	-19.3333	-16.9667	-13.9667	-8.86667	-7.73333	-5.76667	-3.7
probe5 stops	-58.6667	-50.0333	-49.5	-46.8333	-41.9	-39	-38.2667	-35.4333	-33.1333	-27.5667	-20.4	-19.9333	-19.0667	-16.6333	-13.6	-8.43333	-7.43333	-5.53333	-2.1
fly2 starts
fly2 stops
mosquito 11
tracking gap starts:
tracking gap stops:
groom3 starts	-60	-25.3333	-23.3	1.96667	4.8	14.1333	19.7	33.4667	48.2667
groom3 stops	-25.7333	-23.6	0.266667	2.56667	5.43333	14.6333	22.5	39.4333	48.4667
walk3 starts	-42.8667	1.66667	41.6667	49.9
walk3 stops	-42.6	2.3	42.8667	50.1333
probe5 starts	3.43333	7.13333	8.9	9.8	16.5	19.8667	34.7667	38.8333	46.4667	49.6667	51.7333	77.3	82.6667
probe5 stops	5.53333	8.63333	9.36667	10	16.8	20.2333	35.3667	39.0667	46.7	50.1	52.3333	78.1	83.1
fly2 starts
fly2 stops
mosquito 12
tracking gap starts:
tracking gap stops:
groom3 starts	19.7	25.8333	31.8667	83.4333
groom3 stops	20.1667	26.6333	32.2	83.7
walk3 starts	4.16667	5.53333	10.5333	11.4
walk3 stops	5.3	6.8	11.1	11.7667
probe5 starts	4.8	12.2667	22
probe5 stops	11.7	12.5333	22.2333
fly2 starts
fly2 stops
mosquito 13
tracking gap starts:
tracking gap stops:
groom3 starts	-16.9333	78.3667	84.0667	85.6667	90.0667
groom3 stops	-16.2333	78.5667	85.4	86.7667	90.3667
walk3 starts	89.2333
walk3 stops	90.2
probe5 starts	-45.5667	-40.8	44.6333	54.9667	89.6333	95.2	96.3333	100.433	106.333
probe5 stops	-45.3667	-40.5	45	55.1667	91.2667	95.5333	96.6667	100.667	108.2
fly2 starts
fly2 stops
mosquito 14
tracking gap starts:
tracking gap stops:
groom3 starts	-60	-53.3667	-27.8333	-25.5667	-8.03333	-3.43333	11.5	13.3667	19.0333	22.8667	23.4333	38.7	40.3333	46.4	52.4667	55.3333	58.1	58.6333	67.8	70.0667	70.8333	73.3	76.0333	76.6667	78.5333	79.4667	81.2333	85.6333	89.4667	96.6667
groom3 stops	-53.9	-28.0667	-26.4333	-8.8	-3.86667	1.73333	12.6667	18.7333	19.3667	23.1667	37.2667	39.3	43.1333	51.5667	52.9333	57.3	58.3	63.7	68.6333	70.3667	72.4333	74.2667	76.4667	78	79.1667	80.0333	83.3667	86.3	96.4333	120.033
walk3 starts
walk3 stops
probe5 starts	0.5	2.26667
probe5 stops	0.8	4.7
fly2 starts
fly2 stops
mosquito 15
tracking gap starts:
tracking gap stops:
groom3 starts	75.1667	95.7333
groom3 stops	75.9	95.9667
walk3 starts	-60	-54.8667	-46.7667	-37.0667	-30.1333	-26.3	-20.9667	-16.2	59.5	75.9	84.3	86.9667	93.3667	95.5333	95.9333	97.7	98.2333	99.6667	110.933	111.533	113	113.567	114
walk3 stops	-56.0667	-53.2	-37.8333	-35.4667	-26.7	-23.3333	-20.3	-15.9333	59.6667	76.3333	85.0667	87.2667	94.9667	95.7	96.1	97.8667	98.6333	99.9	111.233	111.767	113.267	113.833	115
probe5 starts	-60	-59.3333	-58.3333	-28.6667	114.667
probe5 stops	-59.5667	-58.7	-57.9333	-28.3333	115
fly2 starts	-55.3667	-53.5667	-47.2667	-40.8667	-37.9667	-35.6333	-26.8667	-20.3333	111.733	111.9	111.967	112.367
fly2 stops	-55.2333	-53.3333	-47.1	-40.5333	-37.9333	-35.2667	-26.6	-20.0333	111.867	111.933	112	112.5
mosquito 16
tracking gap starts:
tracking gap stops:
groom3 starts
groom3 stops
walk3 starts	77.3667	83.7333	86.7	88.3	93.4333	101.9	103.067	105.133	106.5	117.3
walk3 stops	77.5667	84.8	87.2333	88.8667	93.8	102.433	103.267	105.667	109.033	119.6
probe5 starts	83.0333	117.967	118.867
probe5 stops	83.3	118.533	119.3
fly2 starts	75.1667	94.6667	107.6	107.667	107.833
fly2 stops	76.3667	95.6333	107.633	107.8	107.9
mosquito 17
tracking gap starts:
tracking gap stops:
groom3 starts
groom3 stops
walk3 starts
walk3 stops
probe5 starts	11.0333	14.2
probe5 stops	11.5333	14.5667
fly2 starts
fly2 stops
mosquito 18
tracking gap starts:
tracking gap stops:
groom3 starts	41.7	48
groom3 stops	42.0333	48.7
walk3 starts
walk3 stops
probe5 starts
probe5 stops
fly2 starts
fly2 stops
mosquito 19
tracking gap starts:
tracking gap stops:
groom3 starts	6	10.8	36.3667	67.4333	118.567
groom3 stops	6.6	11.2	36.7333	67.7	118.8
walk3 starts
walk3 stops
probe5 starts
probe5 stops
fly2 starts	5.86667	10.9	11
fly2 stops	6.56667	10.9667	11.0333
mosquito 20
tracking gap starts:
tracking gap stops:
groom3 starts	0.233333
groom3 stops	1.33333
walk3 starts	-9.53333	-6.56667
walk3 stops	-9.03333	-5.86667
probe5 starts
probe5 stops
fly2 starts
fly2 stops
mosquito 21
tracking gap starts:
tracking gap stops:
groom3 starts	-59.0333	-55.7	-53.9333	-51.6667	-48.3333	-47.1333	-45.3667	-43.1333	-41.4333	-40.0333	-37.6667	-37	-34.0667	-32.9667	-30.6333	-26.3	-24.6	-23.6667	-20.2	-19.3667	-16.7667	-10.8333	-9.9	-8.93333	-7.26667	-4.13333	-1.93333	-0.0333333	7.16667	9.93333	20	20.6	24	28.1333	29.7333	32.0667	33.6667	34.2667	35.1	35.8667	43.2	47.7	51.8	54.4	58.5333	59.9333	63	64.7	65.9333
groom3 stops	-56.0333	-54.2	-51.9667	-49.6333	-47.6667	-46.4333	-45.1	-42.8	-40.9667	-38	-37.2	-34.3667	-33.8	-32.1667	-30.0667	-24.9667	-24	-20.9333	-19.7	-17.6667	-11.1	-10.1	-9.3	-7.5	-4.7	-2.2	-0.3	5.96667	9.7	17.6	20.3667	22.6333	26.8667	28.9667	31.8	33.4667	34.0667	34.7	35.5	42.9667	47.1333	51.2	53.9333	55.9	58.9333	61.3	64.3	65.2333	68.2333
walk3 starts
walk3 stops
probe5 starts
probe5 stops
fly2 starts
fly2 stops
mosquito 22
tracking gap starts:
tracking gap stops:
groom3 starts	-60	-59.1	-58.5	-57.6	-52.5	-51.8	-50.8667	-49.5667	-44.3333	-42.5	-41.9333	-39.5333	-37.1333	-31	-15.8333	-8.6	9.23333	11.1667	13.8333	15.1667	16.0333	17.8667	25.9	30.4667	34.3333	37.0667	39.1	42.4667	44.9333	45.4	51.4	52.2333	56.7	64.3333	67	101.233	101.7	108.5	111.633	116	118.733
groom3 stops	-59.4	-58.7667	-58.1667	-55.9	-52.1	-51.3333	-49.8667	-44.7333	-43.2	-42.1667	-41.7333	-37.7	-31.4333	-16.2	-8.86667	-0.533333	9.86667	11.4333	14.9333	15.3667	16.5333	18.2	26.2667	31.4	35.2333	37.6667	39.6667	43.0333	45.1667	45.8	51.9	53.4	56.9667	64.7333	67.8333	101.467	108.133	110.8	115.733	117.633	120.033
walk3 starts	-14.7	-13.9333	-13.0667	-12.5	-2.3
walk3 stops	-14.5333	-13.5	-12.8333	-12.3333	-1.86667
probe5 starts
probe5 stops
fly2 starts
fly2 stops
mosquito 23
tracking gap starts:
tracking gap stops:
groom3 starts
groom3 stops
walk3 starts	-59.6667	-56.2667	-43.1667	-39.2
walk3 stops	-59.4667	-55.9667	-42.8333	-38.7
probe5 starts
probe5 stops
fly2 starts
fly2 stops
Wildtype (Liverpool) light
mosquito 1
tracking gap starts:
tracking gap stops:
groom3 starts	-60	-58.9	-54.8333	-47.5	-46.6	-45.0667	-44.2333	-42.7333	-13.4667	-10.3	-4.93333	-0.0666667	2.26667	4.96667	7.83333	12.1	14.8333	24.2	28.0667	33.7667	34.7	44.2667	49.5	52.6333	55.9333	57.9667	60.8	65.5	67.3667	69.5	71.4667	72.6	73.2333	75.9	80.1333	81.6333	83.4	89.3333	89.8333	93.9333	96.7	97.6	98.5333	100	110.933	117.9
groom3 stops	-59.1	-55.3	-48	-46.9667	-46	-44.5333	-43	-22.1	-13.1333	-9.76667	-4.1	0.433333	2.6	7.5	11.2667	13.2	23.8667	27.8333	28.4	34.3333	44.0333	47.8667	52.4333	53.4333	56.3333	59.7667	62.9	65.9	67.6333	70.7	71.7	72.8	75.6667	79.5	80.7	83.0333	88.0333	89.5333	93.4333	96.0333	97.2667	97.8333	99.7333	110.733	117.367	120.033
walk3 starts	-54.9	65.8667
walk3 stops	-54.5667	66.1333
probe5 starts	-18.9	-15.4	-14.9667	-13.1	-10.9333	-9.83333	-6.7	-4.26667	-1.56667	-0.933333	-0.2	3.93333	53.8667	55.9667
probe5 stops	-17.7333	-15.1667	-14.0333	-11.1333	-10.5	-7.83333	-4.9	-3.6	-1.36667	-0.7	1.1	4.33333	54.0667	56.5667
fly2 starts
fly2 stops
mosquito 2
tracking gap starts:
tracking gap stops:
groom3 starts	-60	-56.4667	-34.0667	-29.6333	-28.4333	-26.7667	-25.3	6.8	43.3333	90.1333	93.2333	94.1667	115.933
groom3 stops	-59.8667	-38.2667	-31.5	-28.9	-26.9667	-26.2333	5.66667	41.6667	87.3667	91.4333	93.5	110.067	120.033
walk3 starts	113.067
walk3 stops	113.233
probe5 starts	-35.6	-31.4333	-28.7	-27.8333	-26.4	-24.5667	-4.1	18.5333	87.1	93.9333	95.4667	101.367	114.7	117
probe5 stops	-33.8667	-29	-28.4	-27.4	-26.0667	-23.8333	-3.9	18.7333	88.0333	94.5	95.9667	101.733	115.167	117.5
fly2 starts
fly2 stops
mosquito 3
tracking gap starts:
tracking gap stops:
groom3 starts	-30.3	-18.6333	-16.0667	3.43333
groom3 stops	-30	-18.1333	-15.3667	3.93333
walk3 starts	-53.5667	-47.7	-43.7333	-39.1333	-37.7333	-13.1	-11.1333	-9.63333	-8.8	-3.5	-2.86667	3.76667	8.13333	12.8	13.3667	36.8	41.2667	41.9667	42.6	45.7333	49.4	49.9667	50.7667	57.8333	59.0333	64.4	76.1667	79.5667	81.9667	88.0333	94.6667	97.9	102.667	118.267
walk3 stops	-53.1	-43.9667	-42.4333	-37.9333	-36.5333	-12.8333	-9.83333	-9.33333	-8.56667	-3.33333	3.36667	5.2	8.76667	13.1333	15.2333	38.0333	41.6333	42.3	43.4333	46	49.5667	50.4333	51.0333	58.1333	59.2333	64.6333	76.5	80.3667	82.4333	88.3667	96.0333	98.2	102.867	118.467
probe5 starts	15.2	18.6333	21.3	23.7	25.9	30.7333	33.4667	77.8
probe5 stops	16.8333	20.5	22.2333	24.0667	26.2	32.1	33.8	79.1
fly2 starts	-51.6	-38.0667	-34.5667	-9.96667	3.4
fly2 stops	-50.4667	-37.9333	-33.4	-9.16667	3.6
mosquito 4
tracking gap starts:
tracking gap stops:
groom3 starts	-60	-50.6333	-48.4333	-45.2333	-40.4	-25.6333	-21.9667	-21.2	-19.6333	-17.9333	-11.9333	-9.2	-1.46667	19.6	43.3333	46.2	54.9333	89.7333	91.7333	99.3667	100.133	101.1	105.833	107.467	109.933	113.4	119.667
groom3 stops	-51.9	-48.7667	-45.4333	-40.9333	-26	-23.5	-21.5	-19.9	-19.2667	-12.5333	-11.6667	-2.03333	1.06667	43.0667	45.8333	54.7	59.5333	90	91.9667	99.8667	100.367	104.267	107.133	108.667	111.967	117.967	120.033
walk3 starts	2.5	6.03333	9.33333	53.1333	85.8667	89.1	91.4667	97.9	99.6	104.2
walk3 stops	3.3	8	13.5333	53.5333	86.9	89.3333	92.4333	98.1	101.367	104.8
probe5 starts	-57.9667	-56.8	-46.6667	-20.0333	-17.9333	2.03333	4.4	8.83333	59.8	60.8333	61.2667	72.9	77.8667	82.1
probe5 stops	-57.6667	-56.1333	-46.4667	-19.6667	-17.5	2.46667	4.9	9.1	60.0333	61.0667	61.6333	73.7333	78.2	82.4
fly2 starts
fly2 stops
mosquito 5
tracking gap starts:
tracking gap stops:
groom3 starts	27.1333	28.4333	30.8667	32.9333	36.3	37.5667	38.2	45	107.333
groom3 stops	28.1	28.6667	32.1667	35.1	36.8667	37.9333	38.4667	45.3	107.6
walk3 starts	45.5333	49.2333	53.7	54.3	58.4333	64.7	65.1333	66.4	77.0333	84	86.1667	87.7667	89.1667	91.4	105.933	111.067	119.733
walk3 stops	45.7667	49.4	53.9333	56.4667	64.3333	64.8667	65.3	69.5333	78	86	87.0333	88.4667	91.0667	95.2667	110.567	119.467	119.9
probe5 starts	54.2667	55.1	57.5667	88.8
probe5 stops	54.8333	57.2	58	89.4
fly2 starts	51.8
fly2 stops	52.0333
mosquito 6
tracking gap starts:
tracking gap stops:
groom3 starts	-60	-39.4667	-33.2667	-29.4333	-17.5	-16.0667	63.5667	67.1667	73.8333	84	85.3	96.1667	117.8	118.633	119.367
groom3 stops	-39.9333	-33.7	-30.2333	-17.8333	-17.0667	-13.9667	63.7667	72.6	83	84.4	95.9667	115.7	118	118.9	120.033
walk3 starts	0.333333	2.23333	9.56667	12.2	16.5667	22.8333	27.4667	28.4	33.9	34.9333	37.2333	37.7	46.3333	59.5667
walk3 stops	1.93333	2.6	10.9	13.7667	18.0333	27.3	27.8667	28.9667	34.5667	37.0667	37.5333	38.6667	48.7667	60.2333
probe5 starts	26.6667	38.3333	39.1	45.9333
probe5 stops	27	38.7333	39.5667	46.2667
fly2 starts	10.8333	11.5667	30.5333
fly2 stops	11.5333	11.6667	32.3
mosquito 7
tracking gap starts:
tracking gap stops:
groom3 starts	-60	-46.2333	-31.8	-27.3333	-9.26667	-3.83333	-3.4	1.23333	15.6	16.4333	17.0333	24.3667	46.5333	80.7333
groom3 stops	-47.6	-32.6667	-28.3333	-11	-4.4	-3.6	0.8	7.3	16.2333	16.7	18.5667	24.5667	46.7667	80.9667
walk3 starts	-19.8	-4.6	21.4	25.6333	26.6333
walk3 stops	-19.5333	-3.93333	21.8333	26.1	27.1
probe5 starts	28.0667
probe5 stops	28.6333
fly2 starts
fly2 stops
mosquito 8
tracking gap starts:
tracking gap stops:
groom3 starts	-60	-38.2333	-12.1333	10.2667	15.6	18.9667	22.5333	23.4	41.9	55.2333	57.8333	70.3333	73.0667	73.8333	80.4	82.9	86.0667	109.533	111.133	112.2
groom3 stops	-38.5333	-12.4333	4.66667	11.2333	16.7333	19.2	23.2	23.8667	42.8667	55.5	65.6	70.8667	73.4333	79.8333	80.8	84.8667	89.7	110.467	111.333	116.367
walk3 starts	-37.5667	-4.96667	97.3667
walk3 stops	-37.3	-4.53333	97.6333
probe5 starts	119.433
probe5 stops	119.767
fly2 starts
fly2 stops
mosquito 9
tracking gap starts:
tracking gap stops:
groom3 starts	-60	-56.7333	-54.8	-54.1	-52.7	-50.4667	-49.5333	-45.1333	-44.3667	-43.2	-42.7333	-40.2	-39.1667	-37.5667	-35.1333	-33.0333	-30.8333	-26.9	-25.3333	-23.3333	-17.9333	-16.1333	-15.5333	-13.1667	-8.83333	-7.36667	-4.9	-2.46667	-0.0333333	2.63333	4.5	8.8	10.5333	11.5333	11.9667	15.4333	16.3667	18.3	19.8333	24	27	29	31.2333	32.7667	33.6667	37.5667	40.5667	41.1	42.8333
groom3 stops	-59.4667	-55.5	-54.6	-53.2333	-50.8667	-50.0333	-45.5333	-44.8333	-44.1333	-42.9333	-42.3	-39.7667	-38.2333	-36.8667	-34.1333	-31.0333	-28.1	-26.1333	-23.7333	-20.5333	-16.9	-15.8667	-14	-11.9333	-8.16667	-5.13333	-4.5	-1.06667	0.733333	4.16667	6.36667	9.53333	11.3333	11.7333	14.9333	15.6667	18.0667	18.7667	20.3333	24.5	28.7333	30.4	31.4333	33.1667	37.0667	38.5	40.8667	42.5667	46.5
walk3 starts	3.06667	6.5
walk3 stops	3.23333	6.66667
probe5 starts	1.9
probe5 stops	2.1
fly2 starts
fly2 stops
mosquito 10
tracking gap starts:
tracking gap stops:
groom3 starts	5.5	7.83333	18.4
groom3 stops	6.66667	8.16667	18.6
walk3 starts
walk3 stops
probe5 starts
probe5 stops
fly2 starts
fly2 stops
mosquito 11
tracking gap starts:
tracking gap stops:
groom3 starts	-13.8	11.5	16.7	19.7667	20.8333	28.7
groom3 stops	-13.3667	11.7333	17.4	20.6333	22.1333	29.9667
walk3 starts	11.0333
walk3 stops	11.6333
probe5 starts
probe5 stops
fly2 starts
fly2 stops
mosquito 12
tracking gap starts:
tracking gap stops:
groom3 starts	-38.3	-37.3333	-19.5	-8.66667	-1.16667	14.9333	32.4333	41.6	52.3333	52.8333	53.6667	60.5	69.6333	81.5
groom3 stops	-37.9667	-36.8667	-18.7	-8.46667	-0.333333	15.9333	33.1	42.6333	52.6	53.1	54.3667	61.0667	69.8667	81.9
walk3 starts
walk3 stops
probe5 starts
probe5 stops
fly2 starts
fly2 stops
mosquito 13
tracking gap starts:
tracking gap stops:
groom3 starts	-56.7333
groom3 stops	-56.5333
walk3 starts
walk3 stops
probe5 starts
probe5 stops
fly2 starts
fly2 stops
mosquito 14
tracking gap starts:
tracking gap stops:
groom3 starts	-59.1333	-58.5667	-54.9667	-49.0333	-47.6667	-44.0667	-41.7667	-39.6333	-38.1	-37.6667	-24.4	-16.5	-14.9667	-11.4667	-10.0333	-4.23333	2.5	4.56667	5.7	26.8	35.9333	39.7	43.6333	50.6	69.6333	73.7667	76.9667	80.7333	81.5	83.7667	84.4667	86	87.6667	91.6333
groom3 stops	-58.8667	-57.3667	-53.6667	-48.7	-46.9333	-43.1667	-40.9667	-39.3	-37.8667	-37.4333	-23.7333	-15.4	-14.4	-11.1667	-8.4	-4.03333	2.83333	5.4	5.9	27.3667	37.6333	39.9667	44.6667	50.8333	69.8333	74.9667	77.4667	81.1333	83.3333	84.1667	85.6	87.0333	89.3	91.9333
walk3 starts
walk3 stops
probe5 starts
probe5 stops
fly2 starts
fly2 stops
mosquito 15
tracking gap starts:
tracking gap stops:
groom3 starts	-59.5333	-38.2	9.53333	22.1333	32.4	87.6333	104.133
groom3 stops	-40	6.86667	20.6667	31.9667	85.9333	103.833	120.033
walk3 starts	-56.7333	5.93333	12.6333	43.5	50.2667	50.8	59.5667	95.8	96.7333	114.333
walk3 stops	-56.4333	6.23333	12.9333	44	50.5	51.1	59.8333	96.3667	96.9	114.9
probe5 starts
probe5 stops
fly2 starts
fly2 stops
mosquito 16
tracking gap starts:
tracking gap stops:
groom3 starts	-60	-24.2333	-15.4667	-9.3	-8.73333	15.9333	42.3	43.5	44.3667	66.1667	84.6333	93.5333	102	105.167	106.567	107.4	110.9	111.367
groom3 stops	-24.8	-23.5333	-15.2667	-9.1	14.8667	36.5	43.3	44.0667	62.0333	84.4333	88.9	96.2667	103.9	105.533	107.167	109.2	111.167	120.033
walk3 starts	-24.4667	-5.63333	-0.9
walk3 stops	-24.2667	-5.46667	-0.366667
probe5 starts
probe5 stops
fly2 starts
fly2 stops
mosquito 17
tracking gap starts:
tracking gap stops:
groom3 starts	-60	-47.2667	-43.3667	-33.9333	-23.7667	-20.3	47.8	51.2333	114.533	117.333
groom3 stops	-47.7333	-44.4333	-34.2667	-24.7667	-20.5	47.6	49.6333	113.567	116.9	119.4
walk3 starts
walk3 stops
probe5 starts
probe5 stops
fly2 starts
fly2 stops
mosquito 18
tracking gap starts:
tracking gap stops:
groom3 starts	-60	-55.2333	-47.8	-45.8333	-40.9333	-40.2667	-34.0333	-31.7	-26.6333	2.43333	3.66667	8.03333	8.66667	12.5	19.2667	26.7	29.1333	33.2	41.5333	42.2333	43	43.4667	46.9333	54.4	56.2667	57.9333	61.6333	68.0667	68.8667	73.5	75.9667	80.2333	83.2667	83.8667	91.4333	93.4667	98.7667	100.333	108.533	112.167	112.8	115.5
groom3 stops	-58.4667	-54.3	-46.8667	-45.1667	-40.5	-39.4	-33.0333	-31.3	-25.9	2.66667	4.2	8.36667	9.03333	13.8	19.5	27.3	29.4667	33.4667	41.8667	42.7667	43.2	44.6333	48.2	55.6	56.8	58.2333	62.6667	68.6333	71	73.7333	76.3667	80.4667	83.5	85.2333	92.6333	94.9333	99.7	101.4	110.067	112.367	113.267	115.767
walk3 starts	37.7
walk3 stops	37.9
probe5 starts
probe5 stops
fly2 starts
fly2 stops
mosquito 19
tracking gap starts:
tracking gap stops:
groom3 starts	-60	-59.0667	-58.5333	-56.6333	-50.0333	-48.9333	-48.1667	-26.6333	-10.2333	3.46667	25.1	55.8	60.2333	62.2	63.2	65.5	67.2667
groom3 stops	-59.9667	-58.8667	-57.1333	-54.9	-49.6	-48.6	-26.8667	-10.9333	0.533333	24.5	55.5667	56.1	60.4333	62.8333	65.3	67.0333	120.033
walk3 starts	81.7333	82.5	108.867	109.767	113.667
walk3 stops	81.9333	82.7	109.067	110.233	114.033
probe5 starts
probe5 stops
fly2 starts
fly2 stops
mosquito 20
tracking gap starts:
tracking gap stops:
groom3 starts
groom3 stops
walk3 starts	55.6333
walk3 stops	55.9333
probe5 starts
probe5 stops
fly2 starts
fly2 stops
mosquito 21
tracking gap starts:
tracking gap stops:
groom3 starts
groom3 stops
walk3 starts
walk3 stops
probe5 starts
probe5 stops
fly2 starts
fly2 stops
mosquito 22
tracking gap starts:
tracking gap stops:
groom3 starts
groom3 stops
walk3 starts
walk3 stops
probe5 starts
probe5 stops
fly2 starts
fly2 stops
mosquito 23
tracking gap starts:
tracking gap stops:
groom3 starts
groom3 stops
walk3 starts
walk3 stops
probe5 starts
probe5 stops
fly2 starts
fly2 stops
Wildtype (Liverpool) heat + light
mosquito 1
tracking gap starts:
tracking gap stops:
groom3 starts	5.5	28.6667	29.3	87.4	88.7333
groom3 stops	5.9	29	29.7333	87.6667	89.1333
walk3 starts	10.0333	11.1667	35	35.8	36.7	38.0667	41.5333	42.0667	43.5333	46.4	47.0333	47.7	48.2333	48.5667	50	51.3333	56.3333	57.7667	59.2	62.0667	63.2	67.1
walk3 stops	10.7	11.8667	35.4333	35.9667	37.8667	39.5	41.7333	42.8333	44.4	46.5667	47.4333	47.9667	48.4	49.5	51	55.2667	57.1333	58.8	61.8	62.5333	65.1667	70.3333
probe5 starts	-11.6667	10.4667	10.9667	11.6667	12.9667	22.8667	29.6333	30.3	30.8667	51.9333	57.1	57.6667	58.8333	60.2667	61	69.4667	73.3333	83.2667	83.8667	96.5333	100.367	102.2	108.967	116.067	116.533
probe5 stops	-11.1333	10.6667	11.3333	12.6667	21.7333	29.4333	30.0333	30.5333	48.9	56.5333	57.3	57.9	59.0333	60.4667	61.7667	70.3667	74.7667	83.6667	84.8	98.1333	100.7	103.133	110.433	116.3	117.433
fly2 starts
fly2 stops
mosquito 2
tracking gap starts:
tracking gap stops:
groom3 starts	40.1	47.7
groom3 stops	40.3667	47.9333
walk3 starts	3	5.9	11.4	12.0333	13.7333	15.8667	21.9	23.5	26.9	29	31.2667	33.0667	38.5333	41.3	41.9667	46.4	67.5667	68.7	82.0667	94.2333	95.2667	96.0667	98.7333	99.9333	101.433	111.667
walk3 stops	3.16667	6.4	11.5667	13.1333	14.6	18.1	22.5	25.8	28.5333	29.2333	31.9667	33.3	39.4	41.6667	44.4333	52.1333	67.9667	70.8	82.2667	94.9667	95.5333	98.5	99.0333	100.133	102.4	114.4
probe5 starts	11.2	12.3	13.3667	15.0333	16.3667	19.8	27.9667	34.2333	39.4667	39.9667	43.7	47.7	50.8	51.4667	67.8333	96.6667	100.233	100.767	103.1	110.133	111.333	113.6	115.733	117.733	118.833
probe5 stops	11.6333	12.5	14.1333	16.0667	19.4333	27	33.3333	35.8	39.7333	42.1667	46.7667	49.7	51.2667	52.0667	68.1333	99.7	100.5	102.067	103.5	110.7	113.2	114.367	116.067	118.433	119.167
fly2 starts	10.6
fly2 stops	10.7333
mosquito 3
tracking gap starts:
tracking gap stops:
groom3 starts
groom3 stops
walk3 starts	9.9	13.7333	16.0333	17.7667	24.7	25.2333	31.1	32.6	34.7667	48.5333	53.6333	54.8667	56.2	63.9333	73.6333	78.0667	86.9	92.9	94.4667	100.133	109.5	114.433	117.833	118.367	119.1
walk3 stops	11.0667	14.4	16.9333	18.6667	24.8667	29.1	32.4333	34.5667	43.8667	49.5	53.8667	55.6	63.7667	71.1333	77.5333	86.3333	89.8333	93.2	99.5667	104.733	114.067	115.533	118.067	118.833	120.033
probe5 starts	8.36667	11.8333	13.9333	15.1667	25.3333	27.1333	31	32.7667	33.9333	39.3	52.9	54.3667	58.9	59.5	69.1	76.5667	79.7333
probe5 stops	10.6667	12.4333	14.8667	18.6	26.2333	29.6	31.3	33.7333	35.2	43.1667	54.1333	55.5667	59.1667	61.6	70.4667	79.3667	81.8667
fly2 starts	72.8333	91.2667	91.7333
fly2 stops	72.9333	91.4667	91.8667
mosquito 4
tracking gap starts:
tracking gap stops:
groom3 starts
groom3 stops
walk3 starts	12.4333	19.2333	22.9667	24.5	33.9667	66.4667	68.4333	78.2333	79.7333	86.4333	87.7
walk3 stops	16.3333	20.4333	24.0667	27	34.1667	67.9667	69.6	79.3333	80.3667	87.4333	89.2667
probe5 starts	14.5	31.1667	33.4	68	75.4	79.2667	81.4667	87.4667
probe5 stops	28.5667	32.9667	33.8333	70.4667	76.8667	79.5667	82.1667	88.2333
fly2 starts
fly2 stops
mosquito 5
tracking gap starts:
tracking gap stops:
groom3 starts	-60	-57	-2	9.93333	10.8333	23.7333	24.6667	31.7333	62.6333	64	74.3333	87.1333
groom3 stops	-57.3	-2.46667	-1.4	10.6333	11.1	24.1	24.9667	32.5333	62.8333	64.5	74.7333	88.1
walk3 starts	30.9333	33.5	34.1667	41.7667	43.8667
walk3 stops	31.5	33.8667	34.3667	42	44.1667
probe5 starts	6.2	8.16667	9.66667	10.1333	13.4667	18	18.7	25.7	26.3667	32.6667	34.9	35.5	39.1667	49.4667	89.9333	102.367	109.233	116.933
probe5 stops	7.26667	9.16667	9.9	10.4667	16.7667	18.3333	18.9667	26.1	29.1	33.9333	35.1	36.2333	44.8667	50.4667	90.2667	102.633	109.467	117.133
fly2 starts
fly2 stops
mosquito 6
tracking gap starts:
tracking gap stops:
groom3 starts	66.4
groom3 stops	68.0667
walk3 starts	1.16667	3.43333	4	6.76667	9.16667	9.96667	13.7333	18.1667	28.4333	30.1333	30.8333	51.2667
walk3 stops	1.8	3.76667	4.3	6.96667	9.33333	10.1333	16.5	28.1333	29.1	30.5333	31	51.7333
probe5 starts	3.86667	18.3
probe5 stops	17.0333	23
fly2 starts
fly2 stops
mosquito 7
tracking gap starts:
tracking gap stops:
groom3 starts	-57.0333	-55.8667	-54.9	-51.9667	-50.6	3.16667	4.1	20.8667	21.3333	34.6	39.5667	51.5	54.1667	73.3667	75.3
groom3 stops	-56.3	-55.4667	-54.5333	-51.6333	-50.0667	3.73333	4.66667	21.1333	22.4667	34.9333	40.2	52.5333	54.6667	74.2333	75.7
walk3 starts	2.56667	6.83333	16.7333	21.5	22.2	31.5667	35.7	37.5667	41.2667	41.8	46.8333	49.0333	53.9667	56.2667	67.6667	74.5333	80.8333	82.6	94.8333	100.633	101.367	107.8	113.4
walk3 stops	2.73333	16.5333	21.1333	21.8	23.3667	31.9667	36.4333	38.0667	41.5333	45.8667	48.7333	51.8	56.1	64.4	71.8333	77.9333	81.7333	90.7333	100.367	101.033	102.733	111.9	117.767
probe5 starts	6.4	8.16667	35.2	43.1	60.8	61.5333
probe5 stops	7.53333	21.4333	35.7667	43.4	61.3	61.9667
fly2 starts	2.43333	23.8333	34.4333	77.8	78.0667
fly2 stops	2.83333	24.4	34.7333	78.0333	78.4
mosquito 8
tracking gap starts:
tracking gap stops:
groom3 starts
groom3 stops
walk3 starts	2.8	4.73333	5.16667	22.7667	50.4	51.4667
walk3 stops	3.4	4.93333	5.6	22.9333	51.1667	52.1
probe5 starts	3.8	6.7	9.4	17.5	18.9
probe5 stops	4	7.3	17.2667	18.4667	22.6667
fly2 starts
fly2 stops
mosquito 9
tracking gap starts:
tracking gap stops:
groom3 starts	76.8667
groom3 stops	77.1
walk3 starts	-55.8	6.46667	15.8667	17.4	20.9	22.9667	24.9	28.1333	32.5	37.1333	47.4333	55.3667	61.8	66.8333	113.933
walk3 stops	-55.5	6.8	17.0333	18.4333	21.2667	23.3	25.6667	29.6	32.7333	37.8333	47.6667	56.0333	62.0333	67.0667	114.267
probe5 starts	6.56667	16.9333	37.4667	115.467	117.333	118.633	119.567
probe5 stops	14.2	17.3667	37.7667	117.133	118	118.9	120.033
fly2 starts
fly2 stops
mosquito 10
tracking gap starts:
tracking gap stops:
groom3 starts	-58.2	-42.5667	-36.8	-24.8667	-16.9333	-15.9667	-13.6667	-13.2333	-12.5667	-10.5333	-9.6	5	7.43333	8.9	10.2	21.2	27.4667	78.9333	86.1333	98.2	99
groom3 stops	-57	-42.3	-36.5667	-24.6333	-16.3	-15.7	-13.4333	-12.7667	-11.2333	-9.86667	-7.73333	6.33333	7.66667	9.2	11.1667	21.5667	28.1333	79.4333	86.5	98.8	99.5667
walk3 starts	-56.4667	-51.8	-22.7333	-10.7667	-3.8	1.43333	3.76667	5.7	6.33333	13.3667	16.8667	21.9667	23.2667	25.4667	28.2	33.6	34.7	40.3667	43.2	51.8333	52.4667	57.5667	65.9	72.6333	79	87.4667	97.5333	100.767	103.267
walk3 stops	-55.6667	-51.5	-22.2333	-10.5333	-3.5	2.13333	4.96667	6.03333	6.96667	13.7667	19	22.7667	23.9667	26	33.1	34.2	40.1333	42.9333	48.5	52.2667	56.5667	63.5333	72.4667	74.8333	80.4333	88.0333	98.1667	102.167	104.3
probe5 starts	-32.6333	29.7	37.4	45.5	56.4667	59.4667	68.0333	71.6	103.433	103.967	113.1
probe5 stops	-32.4	32.1	38.0333	46.8333	57.7667	59.9	68.8333	72.2333	103.7	104.4	113.433
fly2 starts	9	9.1
fly2 stops	9.06667	9.6
mosquito 11
tracking gap starts:
tracking gap stops:
groom3 starts
groom3 stops
walk3 starts	1.46667	9.16667	10.6	12.4333	13	14.3333	17.1667	19.8333	21.6	23.1	25.7667	27	28.5	39.0667	40	49.9667	54.4333	56.2333	58.2	59.0333	61.6333	64.2	91.9333	102.3	104.1
walk3 stops	1.66667	10.2667	10.7667	12.8333	14.0333	16.6667	18.5	21.3	21.8	23.8333	26.5667	28.1667	36.9333	39.4667	48.1	53.7	55.8667	57	58.5667	61.4	62.6	64.6667	93.5667	103.2	107.367
probe5 starts	16.6	20.1	28.4667	30.1	42.3667
probe5 stops	18.1	24.5333	29.0667	30.3333	42.8333
fly2 starts	4.3	14.7333	15.4333	94.2333	94.3
fly2 stops	5.96667	15.4	15.5333	94.2667	94.6667
mosquito 12
tracking gap starts:
tracking gap stops:
groom3 starts	-42.8
groom3 stops	-42.3667
walk3 starts	-25.0667	5.76667	7.16667	12.6667	17.0333	20	28.9	42.4667	46.2	55.4667	66.5667	75	77.6333	79.2667	86.3667	109.2
walk3 stops	-24.5667	6.43333	7.4	13.9333	17.3667	20.4	29.2667	43.4667	46.9667	56	67.1333	75.7333	78.1	79.6333	86.6	109.533
probe5 starts	6.46667	11.7667	13.7	33.6667	76.0667
probe5 stops	11.3333	12.3667	14.1667	33.8667	76.2667
fly2 starts
fly2 stops
mosquito 13
tracking gap starts:
tracking gap stops:
groom3 starts
groom3 stops
walk3 starts	0.6	47.0667	48.9667	53.5333
walk3 stops	7.23333	47.2333	53	54.7333
probe5 starts	54.1333	55.9333	57.7667	58.4333	61.7667	62.5	68.1333	75.2333	80.2333	80.7667	85.6333
probe5 stops	55.3	56.2667	58	59.0667	62.3	62.7	68.4	76.0333	80.5333	80.9667	85.9667
fly2 starts	7.13333
fly2 stops	7.53333
mosquito 14
tracking gap starts:
tracking gap stops:
groom3 starts	-60	-33.5	-29.4333	-26.2	-17.4	-15.8333	2.56667	4.06667	5.03333	18.7	27.2	50.7
groom3 stops	-33.8333	-29.6333	-29.2	-17.6333	-16.3	0.633333	3.86667	4.73333	5.76667	19.7667	27.6333	51
walk3 starts	7.66667	12.6333	13	13.8333	17.1333
walk3 stops	11	12.8	13.4	15.0667	17.5333
probe5 starts	12.9333	17.1667	21.8
probe5 stops	15.9667	18.2333	22.2333
fly2 starts
fly2 stops
mosquito 15
tracking gap starts:
tracking gap stops:
groom3 starts	15.1667	32.9
groom3 stops	16.6	33.1
walk3 starts	-33.1	-27.2	-15.6667	1.03333	1.43333
walk3 stops	-32.8	-26.8667	-15.4667	1.26667	1.8
probe5 starts	16
probe5 stops	19.5
fly2 starts	1.5
fly2 stops	1.9
mosquito 16
tracking gap starts:
tracking gap stops:
groom3 starts	15.6
groom3 stops	15.8333
walk3 starts	4.86667	13.8333	15.3667	19.7333	31.8	39.6333
walk3 stops	8.96667	14.0333	16.8	19.9	32.0667	40.0667
probe5 starts	7.73333	9.76667
probe5 stops	9.5	9.96667
fly2 starts
fly2 stops
mosquito 17
tracking gap starts:
tracking gap stops:
groom3 starts	20.6333	33.2	34.0333	50.5667	51.9
groom3 stops	21.1667	33.5	34.7	51.1333	52.2
walk3 starts	6.3
walk3 stops	6.73333
probe5 starts	9.63333	12.0667
probe5 stops	10.2333	12.4333
fly2 starts
fly2 stops
mosquito 18
tracking gap starts:
tracking gap stops:
groom3 starts	110.1
groom3 stops	110.633
walk3 starts	4.83333	15.7	34.8	36.8333	37.5333	47.2667	64.1	70.9333	75.0333	78.7333	82.5	92.1333	95.8667	97.6333	101.967	104.9	106	107.233	108.467	109.2	111.767	113.467	118.767
walk3 stops	5.46667	17.3333	36.1	37.1	37.8667	47.5333	64.3667	71.1333	76.3667	79.5	83.0667	92.4	96.9667	100.1	104.7	105.7	107	107.933	108.733	109.5	112.3	117.233	120.033
probe5 starts
probe5 stops
fly2 starts	19.6333	20.1667
fly2 stops	20.1333	20.2333
mosquito 19
tracking gap starts:
tracking gap stops:
groom3 starts	-17.4333	-12.5667
groom3 stops	-17.2333	-12.3
walk3 starts
walk3 stops
probe5 starts
probe5 stops
fly2 starts
fly2 stops
mosquito 20
tracking gap starts:
tracking gap stops:
groom3 starts	-49.9667	29.8	36.4667	37.2667	50.5333	65.6	67.2	73.6333	74.4667	81.7	83.2667	83.9333	99.3333	107.1	109.7
groom3 stops	-49.7	30.8667	36.8	37.7667	50.8333	65.9667	67.6667	74.2	74.7	82.4333	83.6667	84.3667	100.1	107.333	110.233
walk3 starts	-46.6667	-46.2667	-22.0667	9.13333	25.9667	67.2333	78.1333	83.8333	85.6667	109.967
walk3 stops	-46.4667	-46.0667	-21.7667	9.53333	26.4	67.6	78.6	84.3667	85.8667	110.533
probe5 starts
probe5 stops
fly2 starts
fly2 stops
mosquito 21
tracking gap starts:
tracking gap stops:
groom3 starts	-60	-40.8667	-37.9333	-34.9667	-34.2333	-24.4	-7.7	-0.566667
groom3 stops	-41.6333	-38.2667	-37.7333	-34.6667	-28.1	-8.9	-3.4	-0.1
walk3 starts
walk3 stops
probe5 starts
probe5 stops
fly2 starts
fly2 stops
mosquito 22
tracking gap starts:
tracking gap stops:
groom3 starts	-60	-56.5	-36.8333	-36.2	-7.8
groom3 stops	-56.7333	-37.1333	-36.4333	-10.6333	-0.9
walk3 starts	10.6
walk3 stops	10.7667
probe5 starts
probe5 stops
fly2 starts
fly2 stops
mosquito 23
tracking gap starts:
tracking gap stops:
groom3 starts
groom3 stops
walk3 starts
walk3 stops
probe5 starts
probe5 stops
fly2 starts
fly2 stops
Gr3 heat
mosquito 1
tracking gap starts:
tracking gap stops:
groom3 starts	0.9	10.7	73.4667	79.9333	81	82.4667	89.9667	90.9667	92.8333	95.9667	96.5667	98.0667	100.9	103.4	104.967	107.367	110.367	113.3	117.2	119.067	119.867
groom3 stops	1.7	11.3	75.8667	80.2333	81.8333	88.2333	90.7667	92.2	95.3333	96.2	97	100	101.733	104.133	105.667	107.9	110.733	114.467	118.733	119.567	120.033
walk3 starts	13.2667	14.4667	16.4333	17.5667	21.9	26.5667	30.2667	31.8	33.4667	40.8333	46.2667	49.1333	49.8	53.7	54.3667	57.6667	68.0667	69.3	71.6667	78.8667	84.9667	85.3667	94.4	112.4	113.933	114.667
walk3 stops	13.6	15.6333	17.4	19	26.3	28.5	31.0333	32.1667	34.6	41.0333	47	49.5	50	54.0333	54.6333	57.9333	68.2333	70.8333	72.0333	81	85.2	85.6333	94.8667	112.567	114.133	115.133
probe5 starts	5.83333	29.0333	33.5	40.9	51.5	57.4667	68.4
probe5 stops	28.1667	31.8667	33.8333	51.1667	54.5333	57.7667	68.8333
fly2 starts
fly2 stops
mosquito 2
tracking gap starts:
tracking gap stops:
groom3 starts	-56.6667	-55.6667	-54.4667	-52.8667	-49.2	-48.3	-40.0667	-38.6333	-33.8	-31.6	-30.3	-27.0333	-17.3667	-6.86667	-6.16667	2.66667	20.5667	28.4333	36.6	47.1667	48.0333	96.2
groom3 stops	-56.1333	-55.2667	-54.1	-50.5	-48.6667	-46.2	-39.2667	-34.0333	-33.0667	-31.1667	-29.4	-17.7667	-8.43333	-6.53333	-5.73333	3	20.8333	28.9333	37.3	47.4	48.2333	96.4667
walk3 starts	2.03333	11.3667	12.6667	18.4667	19.2667	20.1667	22.4	25.0333	27.5333	28.1333	34.3	49.6	62.4	99
walk3 stops	2.23333	12.1	12.9	18.8	19.6333	20.4	23.5	25.3	27.8333	29.3667	34.5333	50.4667	63.2333	99.6667
probe5 starts	0.666667	4.1	7.66667	10.4	25.6	27.1667	30.5	32.2667	51.5333	60	83.6	87.6	95.8	99.0333
probe5 stops	1.5	4.43333	9.23333	25.3333	26.7333	29.8333	31.0333	32.9	51.7333	60.4333	85.6333	88.9667	97.2	102.233
fly2 starts
fly2 stops
mosquito 3
tracking gap starts:
tracking gap stops:
groom3 starts	23.4333	67.2667	72.5667
groom3 stops	24.1667	67.8667	72.8
walk3 starts	2.2	9.2	11.9	14.4667	15.2333	20.6667	22.6667	25.7667	30.7	32.0333	37.2667	41.1667	49.9333	54.3	73.5	75.3333
walk3 stops	3.3	11.1333	12.7	14.6667	20.2333	21.6667	23.1333	26.0333	31	35.9	37.9	41.6667	53.5333	54.8	73.7667	75.8
probe5 starts	2.4	8.96667	50.4667	56.7667	64.9667	66.9333	71.0667	73.5
probe5 stops	8.53333	19	54.7333	57.2333	66.0667	67.1333	71.2667	74.5667
fly2 starts	23.6667
fly2 stops	24.0333
mosquito 4
tracking gap starts:
tracking gap stops:
groom3 starts	-60	-51.1667	-45.0667	-43.4667	-37.4667	-30.6333	-28.0667	-27.4667	-21.7	-20.2	-17.6667	0.9	4.43333	9.06667	10.7	14.4333	20.0333	25.3333	98.6333
groom3 stops	-52.2	-45.9667	-43.7	-37.9333	-30.8333	-28.4333	-27.7667	-23.2667	-20.7667	-17.9667	-4.2	1.1	4.73333	9.83333	11.5333	14.8	20.3	25.6667	98.9333
walk3 starts	-49.9333	-3.4	-2.9	-1.03333	2.96667	6.6	7.03333	10.3	11.3667	11.7333	13.8333	19	47.5667	54	54.4667	57.9333	61.1667	62.3	64.5	65.5667	93.0333	94.4333	99.6333	116.833
walk3 stops	-49.7667	-3.1	-2.66667	1.7	6.4	6.76667	10.1	10.6333	11.5667	12.9	14.9333	19.8333	53.7667	54.1667	57.1667	60.6333	61.3333	63.2	65.2333	66.6333	93.4	94.6	99.8667	118.967
probe5 starts	3.9	4.86667	5.56667	11.2	31.1	35.2333	48.8667	66.1333	115.333
probe5 stops	4.5	5.16667	6.83333	11.4333	31.4333	36	60.9333	66.8333	116.267
fly2 starts
fly2 stops
mosquito 5
tracking gap starts:
tracking gap stops:
groom3 starts
groom3 stops
walk3 starts	7.96667	8.6	11.2667	12.9	13.8667	15.9333	18.9333	23.2333	24.0667	28.6333	30.9	32.2	48.4	65.7	66.6667	68.8	70.7667	73.8	78.4333	79.8667	80.3	81.3	83.0333	84.9667	85.6667	94.4333	95.2667	96.2	97.1	97.5333	99.4333	101.033	103.367	103.733	104.167	105.767	108.467	112.2	113.533	118.3
walk3 stops	8.23333	9.4	12.6	13.4	15.6667	17.7	19.4333	23.4333	25.3	28.8667	31.9333	32.5667	49.0333	65.9667	67.7	69.6333	71.4333	75.1667	79.1	80.0667	81.1333	82.4333	83.4333	85.4	86.9667	95.1	95.6667	96.6	97.3333	97.7	99.6333	101.5	103.567	103.9	104.633	107.967	108.933	113.033	113.767	118.6
probe5 starts	6.7	20.7667	23.9667	31.4	74.2	81.4667	92.4
probe5 stops	18.9	21.5333	25.5	31.8667	75.2667	81.7333	92.6333
fly2 starts	6.66667	6.9
fly2 stops	6.86667	6.93333
mosquito 6
tracking gap starts:
tracking gap stops:
groom3 starts	-59.7667	-58.0667	-56.0333	-48.4	-46.8667	-45.5	-16.1	-15.5667	-14.9333	-0.466667	0.766667	15.1333	47	58.3	72.3	74.2
groom3 stops	-59.5333	-56.9	-54.5333	-47.2667	-46.3333	-18.0333	-15.8667	-15.2333	-0.966667	0.0333333	1.1	15.7333	47.7667	58.7333	72.5333	75.2333
walk3 starts	-54.6667	10.9	12.8333	15.2	18.0667
walk3 stops	-54.5	11.3333	15	15.9667	20.5
probe5 starts	-50.4	-45.8667	4.13333	14.1667	19.2667	32.7
probe5 stops	-49.9	-45.5667	13.3667	15.3333	20	33.9333
fly2 starts
fly2 stops
mosquito 7
tracking gap starts:
tracking gap stops:
groom3 starts	-60	-57.4667	-50.7667	16.2667	91.3667
groom3 stops	-58.1333	-51.8	-50.5	16.6333	91.8667
walk3 starts	-52.1
walk3 stops	-51.9333
probe5 starts	-1.43333	-0.933333	-0.0666667	2.76667	9.6	23.2667	28.5	34	52.4333	53.2	63.1333	80.6667	85.4333	86.2
probe5 stops	-1.23333	-0.433333	0.233333	5.56667	9.8	23.8	28.8667	34.8667	52.7667	53.4	63.3333	81.1	85.8333	86.4
fly2 starts
fly2 stops
mosquito 8
tracking gap starts:
tracking gap stops:
groom3 starts	-60	-49.9333	-45.8333	-38.3333	-33.5	-20.1333	-12.4667	-6.16667	3.76667	13.0333	16.3	17.1333	20.7333	21.8	29.6333	30.2667	31.9333	33.8	36.5333	38.6667	44	46.4333	48.4667	50.8	53.1333	56.9667	59.4667	61.5667	65.5667	69.1667	72.6333	74.6333	75.8	77.4333	78.8667	81.5333	83.8	86.8333	88	93.7667	96.2667	101.433	103.367	105.167	108.067	111.667	114.667	115.5	118.833
groom3 stops	-52.2	-49.5667	-43	-37.7667	-22.2667	-15.5	-6.96667	3.06667	4.1	14.8667	16.5333	20.4667	21.6	29.3	29.9667	31.4	33.3667	34.9	37.5	42.8667	46.1333	48.2667	50.3333	52.2	56.1667	58.6667	60.2333	63.5	66.0667	69.9333	73.3667	75.6	76.8	78.6	79.8333	83.3333	85.4333	87.8	93.3	95.3333	100.8	103.1	104.6	107.833	111.3	113.8	115.3	117.667	119.767
walk3 starts	14.2333	14.8667	15.8667	17.1667	17.8667	19.4	20.2667	24.0333	40.7667	44.3333	53.7	55.6333	64.7333	81.2	87.0333	91.2667	92.8333	107.367
walk3 stops	14.5	15.0333	16.6	17.3667	18.7333	19.7333	20.4667	25.3667	41.4667	44.7	54.3333	55.8	65.0667	82.2667	87.4333	91.6	93.1	107.733
probe5 starts	4.1	5.06667	11.1333	33.9	43.3667	56.5333	57.0667	63.3333	70.8333	72.9	83.5333	109.633	116.433	117.933
probe5 stops	4.33333	5.63333	12.2333	34.2	43.8	56.8333	57.3667	63.6333	71.1667	73.3667	83.9667	110.067	116.867	118.133
fly2 starts
fly2 stops
mosquito 9
tracking gap starts:
tracking gap stops:
groom3 starts	8.06667	23.9	26.2333	36.7333
groom3 stops	8.5	24.3	26.6667	37.0667
walk3 starts	7.73333	8.23333	10.2667	22.6333	95.1333	103.7	106.067	111.433
walk3 stops	8.06667	8.86667	10.6333	23.2	95.3667	104.133	106.333	112.133
probe5 starts	-17.9333	23.0333	31.1667	31.7333	36.2	39	39.4667	45.2667	61.0667	69.9333	102.9	118.267
probe5 stops	-17.7	23.3	31.4	31.9667	36.5667	39.2	40.2333	45.5667	61.7333	70.1667	103.167	119.067
fly2 starts
fly2 stops
mosquito 10
tracking gap starts:
tracking gap stops:
groom3 starts	-60	-56.2667	-29.8333	-22.3667	-18.5	-17.7333	-6.66667	13.7333	17.1333	23.7667	27.3333	30.4667	33.3667	38.5333	40	41	41.7333	46	51.2	56.8333	61.7333	64.3333	66	67.3333	73	75.0667	78.8667	79.5	80.9667	83.0667	90.2	92.1667	95.1333	96.7	99.0333	100.2	102.033	105.867	107.733	110.733	112.7	116.767	119.667
groom3 stops	-56.8333	-31.2667	-22.7	-18.7333	-18	-7.03333	5.96667	14.3	18.9	24.4333	27.6667	30.7667	35.2333	38.9333	40.2667	41.4	42.9333	46.5	51.7	57.9333	63.0667	64.5333	66.7	70.5667	73.2	76.6	79.1333	79.8	81.1667	87.5333	91.3667	92.9333	96.2667	97.2667	99.6	101.233	102.733	106.4	108.3	112.167	113.1	117.633	120.033
walk3 starts
walk3 stops
probe5 starts	-11.8	6.76667	20.9667	39.8667
probe5 stops	-11.0667	7.63333	22	40.3333
fly2 starts
fly2 stops
mosquito 11
tracking gap starts:
tracking gap stops:
groom3 starts	7.36667	8.93333	12.2	18.6	26.1	27.6667	61.6333	62.6	65.3	69.4333	71.6	75.6333	91.9	106.367
groom3 stops	7.8	11.8333	12.5667	18.8	26.4	28.0333	61.9667	64.3667	65.7	71.2667	71.9	76.9333	92.2	106.633
walk3 starts	14.9	19.7333
walk3 stops	15.5	20.0667
probe5 starts	8
probe5 stops	10.3667
fly2 starts
fly2 stops
mosquito 12
tracking gap starts:
tracking gap stops:
groom3 starts	-60	-46.0333	-39.6333	-13.0333	-3.56667	-2.56667	15.6333	20.1	26.8333	32.8667	33.8	35.1667	42.3667	42.9	43.6333	59.9	67.3333	71.1667	77.7667	86.7333	119.4
groom3 stops	-46.5	-43.1333	-29.2	-12.2333	-2.86667	-2.26667	15.8667	21.5	28.6	33.2	34.4	35.5	42.6	43.2	43.9	60.5667	67.9667	71.7333	78.1667	86.9667	119.6
walk3 starts
walk3 stops
probe5 starts	-37.5667	-24.5667	-20.9667	-16.1667
probe5 stops	-37.3333	-24.3667	-19.5333	-15.9667
fly2 starts
fly2 stops
mosquito 13
tracking gap starts:
tracking gap stops:
groom3 starts	-54	0.533333	13.8
groom3 stops	-0.266667	0.933333	14.1
walk3 starts
walk3 stops
probe5 starts	-58.7	-57.3333
probe5 stops	-58.1333	-56.5667
fly2 starts
fly2 stops
mosquito 14
tracking gap starts:
tracking gap stops:
groom3 starts	-52.6667	-49.5333	-41.2667	-38.7667	-31.8	-30.7333	-19.3333	-17.8	-8.26667	0.566667	4.16667	7.1	7.63333	19.5	23.1	24.1333	29.6667	36.2333	37.8	40.6333	41.2333	43	43.6333	47.1	51.9333	53.1667	58.1333	61.8333	65.5667	71.0667	73.7333	76.9333	78.5667	79.8	84.8667	89.7	94.2	103.633	107.267	111.467	114.567
groom3 stops	-52.2667	-48.9333	-41.0667	-38.5333	-31.1667	-30.5333	-18.8333	-17.2333	-7.36667	2.76667	4.83333	7.3	7.93333	21	23.3333	24.7667	29.8667	36.4667	38.3	41	41.6333	43.3667	43.9667	47.3	52.7	53.7667	58.3333	62.6333	65.8333	71.4	74.1333	77.1333	78.9667	80.0333	85.4333	89.9	94.5667	104.5	107.467	112.067	115.467
walk3 starts	62.0667
walk3 stops	62.6
probe5 starts	84.0333	96.2
probe5 stops	84.5333	96.4
fly2 starts
fly2 stops
mosquito 15
tracking gap starts:
tracking gap stops:
groom3 starts	-60	70.0667	75.7	79.5333	98.0667
groom3 stops	-0.8	70.4	75.9	97.6	98.6667
walk3 starts	-53.7667
walk3 stops	-53.5667
probe5 starts	69
probe5 stops	69.5667
fly2 starts
fly2 stops
mosquito 16
tracking gap starts:
tracking gap stops:
groom3 starts	-48.3333	23.8333	32.2667	49.1	52.0667	52.9	66.3667	82.9667	87.1667	88.5	89.1667	94.3	98.0333	100.833	101.567	102.333	110.7	112.6	114.733	115.967	117.3
groom3 stops	-48.0667	24.0667	32.8667	49.3	52.6333	55.6333	66.7667	83.2667	87.4333	88.7667	89.9	96.3333	99.3333	101.167	101.833	110.4	111.5	113.867	115.467	116.167	117.867
walk3 starts	98.7667	100.667	102.267
walk3 stops	99.2333	100.833	102.7
probe5 starts	52.6
probe5 stops	52.8667
fly2 starts
fly2 stops
mosquito 17
tracking gap starts:
tracking gap stops:
groom3 starts	90.0667	117.733
groom3 stops	91.5	118
walk3 starts
walk3 stops
probe5 starts
probe5 stops
fly2 starts
fly2 stops
mosquito 18
tracking gap starts:
tracking gap stops:
groom3 starts	4.46667
groom3 stops	4.96667
walk3 starts
walk3 stops
probe5 starts
probe5 stops
fly2 starts
fly2 stops
mosquito 19
tracking gap starts:
tracking gap stops:
groom3 starts	-8.13333
groom3 stops	-7.73333
walk3 starts
walk3 stops
probe5 starts
probe5 stops
fly2 starts
fly2 stops
mosquito 20
tracking gap starts:
tracking gap stops:
groom3 starts	-50.4	-47.4667	-42.5	8	8.76667	19.4333	25.0667	32.3	33.9333	36.3	37.6	43.5333	48.1667	79.5667	84.5667	96.3	98.1	99.5333	101.133	105	105.6	108.8	111.167	111.8	114.533	116.1	119.3
groom3 stops	-50.1	-46.9667	-42.1	8.3	11.3	23.1667	25.6667	33.4667	34.4	36.5667	38	44.1	48.4	82.2	85.7	96.9	98.7333	100.8	101.367	105.4	105.933	110.2	111.5	112.167	114.933	116.733	120
walk3 starts
walk3 stops
probe5 starts
probe5 stops
fly2 starts
fly2 stops
mosquito 21
tracking gap starts:
tracking gap stops:
groom3 starts	-58.8333	-54.6	-49.6	-49.1333	-47.6	-45.3667	-44.1	-40.3	-37.5333	-36.4333	-31.2333	-26.7333	-23.1667	-14.4333	-9.43333	-5.5	-4.26667	-0.666667	0.9	6.3	39	50.3	51.3333	53.4333	117.2
groom3 stops	-57.3	-50.4333	-49.3333	-48.4333	-45.6	-44.4333	-40.6	-37.9333	-37.3333	-33.2333	-27.1667	-23.6333	-15.0333	-10.1667	-5.73333	-4.7	-1.7	0.466667	1.13333	6.5	39.5333	50.7667	51.9	53.8333	117.467
walk3 starts
walk3 stops
probe5 starts
probe5 stops
fly2 starts
fly2 stops
mosquito 22
tracking gap starts:
tracking gap stops:
groom3 starts	-60	-58.7333	-56.3	-55.7667	-53.0333	-50	-48.2333	-43.9333	-43.3333	-41.3667	-40.6333	-40.2	-38.8667	-37.3667	-31.1667	-27.2667	-22.1667	-19.2	-17.3	-16.8333	-16.2667	-14.9	-7.16667	-6.63333	-6.1	-5.23333	-3.86667	-2.56667	-0.466667	1.06667	2.93333	4.9	6.2	9.03333	14.4333	17	17.5333	22.6	33.2667	57.5333	58.6333	71.1	86.7	94.8	96.2667	98.8667	107.1	112.7	113.867
groom3 stops	-59.5	-57.9333	-56.1	-53.8667	-52.8	-49.8	-46.3	-43.7333	-42.3667	-40.8667	-40.4333	-40	-38.6667	-36.1667	-30.7	-26.9667	-21.9333	-18.3	-17.0333	-16.4667	-15.2667	-11.0333	-6.96667	-6.36667	-5.9	-4.9	-2.9	-2.36667	0.5	1.7	3.6	5.96667	8.13333	10.8667	16.3667	17.2	18.4667	22.8	33.6	57.8	59.0667	71.3	87.1	95.0333	96.6333	101.233	111.733	113.2	114.767
walk3 starts
walk3 stops
probe5 starts
probe5 stops
fly2 starts
fly2 stops
mosquito 23
tracking gap starts:
tracking gap stops:
groom3 starts
groom3 stops
walk3 starts
walk3 stops
probe5 starts
probe5 stops
fly2 starts
fly2 stops
Gr3 light
mosquito 1
tracking gap starts:
tracking gap stops:
groom3 starts	-60	-48.2	-43.5667	-26.5333	-5.43333	-4.13333	12.3	12.8	38.6333	40.5667	69.4	79.8	81.2667	82.2	84.2	85.2667	94.2667	98.1	100.7	104.133	106.7
groom3 stops	-49.2667	-44.5333	-26.9333	-5.9	-4.4	12.0667	12.5667	35.7	39.0333	69.1333	78.6333	80.1333	81.5667	83.2333	84.9667	92.1333	95.6333	99.3667	102.467	106.5	120.033
walk3 starts	-41.6667	46.6333	69.6333	70.0333
walk3 stops	-41.0667	46.9	69.8333	70.2
probe5 starts	-56.8	-56.2333	-55.4	-47.5333	-45.9667	-43.3667	-41.1	-40.3667	-38.7667	-36.2667	-35.6	-31.1667	-29	-26.7333	-25.6333	-22.9333	-20.2	-18.5	-16.5667	-12.1667	-7.86667	-6.53333	-2.83333	-1.8	0.6	7.23333	8.9	9.66667	13.2	14.8	15.3333	16.4333	19.4	20.7	22.2	23.4667	24.9667	26.9	28.4667	29.7	32.9333	37.6	40.7667	46.8667	91.1333	92.5333	99.8667	103.633
probe5 stops	-56.6	-55.8	-53.8333	-46.3667	-45.3667	-41.3333	-40.7667	-39.3	-38.2667	-36	-35.4	-29.6	-27.2333	-26.3667	-25.4	-21.9333	-19.8667	-17	-15.8333	-11.9333	-7.5	-3.9	-2.46667	-1.43333	2.1	7.7	9.3	9.96667	14.2	15	16.1667	16.8	19.7333	20.9333	22.4	23.9333	25.6667	28.1333	29.4	29.9333	33.5	40.1667	40.9667	47.0667	92.2333	93.4	100.533	103.833
fly2 starts
fly2 stops
mosquito 2
tracking gap starts:
tracking gap stops:
groom3 starts	-57.1667	-56.3667	-55.1333	-52.3	-51	-31	5.1	8.13333	14.0667	15.5333	17.1667	18.8	21.9667	24.3	26.2667	27.2667	27.7	30.6667	32.2	35.1	36.1333	39.5667	40.2333	43	44.1	45.2	52.6	57.5	62.9333	74.9667	85.6333	86.7333	88.9	93.3	95.5	98.0333	98.7667	99.8667	101.133	103.733	105.633	106.433	107.167	108.6	111.067	113.2	116.533
groom3 stops	-56.8333	-56.1667	-54.9333	-51.6667	-50.8	-30.6333	5.36667	13.1	15.2667	16.7	17.5333	19.6333	23.0667	25.1333	26.8333	27.5	29.3	31.1667	33.0667	35.7333	38.0667	39.8667	42.1	43.5333	44.3333	51	57.0667	62.3	72.8333	75.6667	86.2	87	89.7333	94.6333	97.0333	98.3667	99.5	100.733	101.433	104.9	106.167	106.633	107.667	109.767	112.267	115.033	116.767
walk3 starts	1.33333	5.2	13.3333	13.8	22.6	24.9333	37.8	73.2333	76.6333	85.4333	87.2667	87.8667
walk3 stops	1.6	8.16667	13.5	14.1	24.7667	25.9	38.3	74.6667	78.0333	86.4667	87.7	88.3
probe5 starts	-60	-58.5333	-57.4667	-46.1667	-42.3667	-40.5333	-39.7333	-36.2	-35.0333	-32.2667	-29.1333	-26.7333	-23.4667	-22.6667	-19.4667	-17.4	-14.2333	-1.5	13.4	14	17.4333	19.1333	22.7	25.9333	26.6667	27.0667	34.1667	61.0333	70.6667
probe5 stops	-59.7	-58.0667	-57.2667	-45.5333	-41.2667	-40.1333	-39.4667	-35.8	-34.7333	-32	-28.6	-26.1333	-23.0333	-22.2333	-18.6667	-16.5333	-13.6	-1.26667	13.7667	14.6	18	19.4	23	26.4	26.8667	27.2667	34.7	61.3	71.9
fly2 starts
fly2 stops
mosquito 3
tracking gap starts:
tracking gap stops:
groom3 starts	-60	-47.7	-33.8667	-32.0667	-30.8667	-26.6	-24.1333	-18.8667	-15.4333	-14.8	-8.46667	-3.9	1.16667	4.66667	6.06667	11.0667	11.8	13.0333	13.7667	16.2	19.3333	30.9	35.7	36.8333	46.4667	47.9	54.0333	60.3	66.9667	73.9	81.2667	106.467	110.267	110.767
groom3 stops	-49.1667	-35.5333	-32.3	-31.1333	-27.0333	-24.8333	-19.3667	-15.9333	-15.0333	-8.7	-4.6	0.633333	2.2	5.06667	7.1	11.4667	12.6333	13.2333	14.8333	19.0667	21.3	32	35.9333	37.7333	46.6667	50.0667	55.3	61.5667	68.1667	74.8333	81.7	106.667	110.567	111.067
walk3 starts	-58.3667	-47.0333	-39.1667	-37.0333	-35.2	-26	34.3333
walk3 stops	-58.1667	-46.8	-38.5333	-36.6	-35.0333	-25.7333	34.6667
probe5 starts	16.6667	18.2333	22.1667	33.4	34.4	40.2	45.9667	52.6667	63.9333	72.8667	79.2667	83.1	90.8333	97.4333	101.267	102.533	104.9	106.967	110.233	113.2
probe5 stops	17	18.5	22.4667	33.8333	34.6667	40.4	46.8	53.0333	64.3667	73.3667	80.1	83.7333	91.2667	97.8333	101.467	102.8	105.233	107.2	111.167	113.433
fly2 starts
fly2 stops
mosquito 4
tracking gap starts:
tracking gap stops:
groom3 starts	-52.6	-45.5667	-40.6667	-40.0667	-36.3333	-29.9333	-15.3667	1.6	4.8	9.96667	12.4	13.1333	14.1	18.2333	29.9	30.5333	36.9333	40.7667	42.8	48.1	50.4667	64.5667	85.1	101.9	118.533
groom3 stops	-51.2667	-45.3	-40.3	-39.7667	-36.1	-29.2333	-14.9333	4.5	5.4	10.8	12.9	13.5	18	23.5667	30.3333	32.8667	37.6	41.6667	44.6667	48.7667	50.7	84.5	101.667	118.233	120.033
walk3 starts	1.63333	3.76667	10.1333	11.5	18.5	32.3667	33.8	37	53.4667	60.7333	64.6667	65	84.8333	86.5333	88.4667	93.7	94.3667	95.1	97.4333	98.6333	99.3	101.633	104.9	106.833	108.4	109.4	112.567	114.067	119.567
walk3 stops	2.13333	6.33333	11.1667	11.9333	19.0667	32.9	34.0667	38.2333	53.6667	62.0667	64.8333	65.1667	85.5333	88.0333	89.0333	93.9667	94.8333	96.2	98	98.9333	99.5333	102.533	105.5	107.367	108.633	109.733	113.067	114.533	120.033
probe5 starts	-45.5	-43.9333	-41.6667	1.33333	5.2	7.33333	14.4333	17.9667	19.1667	19.8667	21.4333	23.3667	33.2667	36.2333
probe5 stops	-45.2333	-43.5	-41.4667	1.7	5.66667	8.76667	15.1	18.2	19.6667	20.0667	22.2	23.9333	33.7	36.4667
fly2 starts	7.33333
fly2 stops	8.03333
mosquito 5
tracking gap starts:
tracking gap stops:
groom3 starts	-59.7	-56.6	-46.1	-44.2333	-40	-36.0667	-34.2667	-32.6667	-31.5667	-30.0667	-26.0667	-22.2667	-21.7667	-21	-14.4333	-13.5333	-6.46667	-1.26667	3.23333	7.33333	10.6667	14.3333	17.7333	36.3333	39.4333	43.2	50.5333	52.6667	59.2	67.8	72.0667	75.7	83.6667	86.4667	87.5	91.1667	93.1667	93.6333	95.8	98.4667	107.167	115.667
groom3 stops	-58.6667	-46.3667	-44.8667	-40.9	-37.1333	-34.4667	-33.8667	-31.8333	-30.2667	-26.6667	-25.7333	-21.9667	-21.5667	-14.7	-13.8	-6.9	-2.16667	0.766667	3.53333	8.36667	10.9667	14.9667	25.6333	36.7667	40	43.8333	51.0333	53.2333	59.6	68.1	72.5	82.6	83.9667	86.8333	88.6667	92.1	93.4333	93.9	97.8333	102.733	115.133	120.033
walk3 starts	-55.0333	-53.5333	-53.2	-52.3667	-50.7667	-48.1667	-37.0333	-27.9667	-26.6667	-25.7667	-24.8667	-21.7667	-20.6667	-20.0333	-16.8	-16.3667	-2.63333	-0.2	4.4	4.83333	7.26667	11.6	23.7333	24.5333	27.6	38.3667	54.9333	57.1	57.5333	61.1333	62.3	66.6	70.1	71.9	72.9667	75.6333	82.5333	84.4667	92	93.6333	98	100.567	104.967	107.233	110.4	110.8	113.633	114.333	116.267
walk3 stops	-54.7	-53.3667	-52.8	-51.0333	-49.3667	-47.9	-36.4333	-27.5667	-25.9333	-25.0333	-22.2667	-21.4333	-20.4	-16.9667	-16.6333	-13.4333	-0.7	0.666667	4.56667	5.76667	7.43333	12.0333	24.1333	25.7333	28.7333	38.8	55.5333	57.3333	58.8	61.7333	62.7	66.8	71	72.6667	73.4667	76.0667	83.4333	84.6333	92.6	94.1667	98.2667	101.2	105.233	107.5	110.633	111.567	113.933	114.533	116.933
probe5 starts	-19.8667	49	49.9667	50.6667	51.7667	53.2333	55.8	58.1	92.0333	105.1
probe5 stops	-19.6333	49.3	50.1667	50.9333	52.5667	54	56	58.4	92.6333	105.933
fly2 starts
fly2 stops
mosquito 6
tracking gap starts:
tracking gap stops:
groom3 starts	-32.1667	-31.3	-30.1667	-24.5	-15.3667	2.1	7.96667	8.93333	10.8667	11.6333	15.3667	19.7	25.1333	30.3333	34.3	43.5333	46.8333	48.2333	51.1667	54.4667	61.5	63.3	64.9333	65.7667	69.7667	71.8333	77.4	79.9333	81.8	92.3	92.8	107.5	116.333
groom3 stops	-31.9333	-30.3667	-29.7333	-23.8333	-14.2667	2.7	8.23333	10.5333	11.0667	11.8667	16.2667	20.9	25.5333	31.8	36.5333	43.8	47.0333	50.9	51.6	56.7333	62.6	64.2333	65.3333	66.2333	70.1	72.7667	77.6333	81.3667	82.0667	92.5	94.1333	108.6	116.833
walk3 starts	13.2333
walk3 stops	13.5667
probe5 starts	8.73333	14.3667	33.4333	52.2333	53.5667	83.4333	86.6333
probe5 stops	9.26667	14.6	33.6333	52.8	54.2667	83.6333	87.5667
fly2 starts	8.03333	8.1
fly2 stops	8.06667	9.3
mosquito 7
tracking gap starts:
tracking gap stops:
groom3 starts	-17.4333	-16.0333	-11.7667	18.2333	19.3667	22.2	22.7	24.9	25.6	54.7	67.4667	73.6	74.5	117.967
groom3 stops	-16.4	-13.3667	-8.76667	19.1	20.5667	22.5	22.9333	25.3	43.7667	54.9333	67.8333	74.1333	116	118.167
walk3 starts	-53.7	-48	-44.8333	-26.5	-21.4667	-18.8333	-12.2667
walk3 stops	-53.0667	-47.7	-44.0667	-26.3	-21	-18.6667	-12
probe5 starts	-22.2	-2.6	2.03333
probe5 stops	-21.7667	-2.13333	2.23333
fly2 starts
fly2 stops
mosquito 8
tracking gap starts:
tracking gap stops:
groom3 starts	-60	-40.6333	-35.1	-32.5333	-32	4.96667	9.8	10.9333	12.1	19.6667	28.7	31.3667	38.8667	40.1	43.5333	45.5333	47.3	47.9	49.2667	51.9667	60	89.6333	91.2	92.2	94.9667	102.8	105
groom3 stops	-41.1333	-35.5667	-32.9333	-32.3	4.4	9.56667	10.4	11.4333	12.5	21.4	29.1	32.2667	39.8333	40.4333	43.7333	45.7333	47.6333	48.2333	51.5333	52.6667	60.9333	89.8333	91.4333	94.7667	99.2333	103.1	105.567
walk3 starts	-60	-57.8333	-56.1667	-41.8333	8.3	10.7667	13.8	22	51.5667	58.7	99	100.067	100.567	113.3	115.4	116.7	118.4	119.667
walk3 stops	-59.8667	-57.5	-55.9667	-41.5333	8.66667	13.6333	15.2	23.2333	52.2333	59.8667	99.7667	100.3	100.8	115.067	115.733	116.967	119.033	119.833
probe5 starts	11.3333	119.533
probe5 stops	11.6667	119.767
fly2 starts
fly2 stops
mosquito 9
tracking gap starts:
tracking gap stops:
groom3 starts	-60	-25.5667	-24.4	-22.5	-20.1	24.3333	25.7667	28.7333	61.1	115.467
groom3 stops	-31.2	-25.0333	-24.1667	-22	24.1333	24.8667	26.9	56.9667	115.033	120.033
walk3 starts
walk3 stops
probe5 starts	26.6667	67.4333
probe5 stops	27	67.6333
fly2 starts
fly2 stops
mosquito 10
tracking gap starts:
tracking gap stops:
groom3 starts	-60	-41.2	-39.7	-7.56667	-5.9	12.4333	30.2667	32.0333	34.6333	50.2667	68.9333	83.2333	110.567
groom3 stops	-50.5667	-40.7	-9.13333	-6.9	11.7667	28.7667	30.5667	33.6333	49.5333	68.3333	82.5333	109.567	120.033
walk3 starts	73.0333
walk3 stops	73.3
probe5 starts	-40.0333
probe5 stops	-39.8
fly2 starts
fly2 stops
mosquito 11
tracking gap starts:
tracking gap stops:
groom3 starts	16.4667	18.1667	26.0667	31.3667	37.1667	39.6667	42.6333	46.3333	48.6	49.2333	51.1	52.9333	55.4333	90.1	92.4	95.0667	95.8	106.333	107.533	109.4	110.1	111.067	119.433
groom3 stops	17.6333	18.8333	27.6667	32.2333	38.9333	42.2333	44.8333	48.4	49	50	52.3333	53.2667	55.8667	90.3	93	95.4	96	106.767	107.733	109.8	110.333	111.533	119.633
walk3 starts
walk3 stops
probe5 starts	-39.9
probe5 stops	-39.7
fly2 starts
fly2 stops
mosquito 12
tracking gap starts:
tracking gap stops:
groom3 starts	29	36.8	38	38.8	39.4333	41.1333	42.9	43.9333	46.5333	48.6667	50.5667	54.7333	58.7333	62.5667	65.3667	66.7333	67.7333	69.6333	71.1333	74.4	75.7	77.4333	78.3333	88.8333	89.2333	92.1	93.5667	97.8667	99.4333	101.967	102.533	107.833	111.2	115.233	119.733
groom3 stops	35.6667	37.7	38.5333	39.1667	39.7667	42.6667	43.5	45.8333	48.4	49.8667	53.8333	58.1333	61.5333	65.1	66.0667	67.3333	68	69.9667	71.7	75.1	76.8333	77.7	87.7	89.0333	91.3667	93.3	97.5667	99.1	101	102.167	105.533	109.367	114.933	117.433	120.033
walk3 starts	24.6333
walk3 stops	25.2333
probe5 starts
probe5 stops
fly2 starts
fly2 stops
mosquito 13
tracking gap starts:
tracking gap stops:
groom3 starts	3.96667	4.4
groom3 stops	4.2	4.96667
walk3 starts
walk3 stops
probe5 starts
probe5 stops
fly2 starts
fly2 stops
mosquito 14
tracking gap starts:
tracking gap stops:
groom3 starts	2.26667
groom3 stops	3.43333
walk3 starts
walk3 stops
probe5 starts
probe5 stops
fly2 starts
fly2 stops
mosquito 15
tracking gap starts:
tracking gap stops:
groom3 starts	-53.7	-50.7667	-47.3	-41.4333	-40	-39.1333	-38.2	-22.3333	-18.9333	-14.1	-13.2333	-7.6	-4.6	-3.46667	-1.3	7.76667	9.96667	14.5333	16.1	20.5333	22.6	23.6667	27.3	28.6	33.3667	36.7	37.3333	43.9333	45.7	46.9	52.8333	53.5667	59.3667	65	65.4667	66.1333	66.8333	71.1333	72.3667	79.3667	82.1	84.4	85.1	85.9333	86.6667	87.3333	88	89.6333	91.1333
groom3 stops	-53.2	-50.5333	-45.2	-40.8	-39.8	-38.4667	-37.9667	-22.1333	-18.2333	-13.5667	-12.2	-5.63333	-4.16667	-2.13333	0.7	8.4	10.1667	14.7667	16.4667	21.0333	23.4667	24.1	27.5667	29.5667	33.6667	37	37.8667	44.1667	46.6	47.1667	53.1333	55	59.5667	65.2333	65.9333	66.3667	68.2667	71.4667	72.6	81.2	82.6333	84.8667	85.4667	86.2333	87	87.7333	88.9667	90.8333	92.5
walk3 starts
walk3 stops
probe5 starts
probe5 stops
fly2 starts
fly2 stops
mosquito 16
tracking gap starts:
tracking gap stops:
groom3 starts	-55.4667	-54.3667	-51.1667	-50.6	-46.6333	-40.0667	-29.9333	-25.1667	38.6333
groom3 stops	-55.2333	-54.1667	-50.9667	-50.3667	-46.4	-39.7667	-28.8333	-23.8333	38.8333
walk3 starts
walk3 stops
probe5 starts
probe5 stops
fly2 starts
fly2 stops
mosquito 17
tracking gap starts:
tracking gap stops:
groom3 starts	-59	-39.1667	-26.2333	-12.7667	2.46667	8.73333	9.9	25.3667	26.3333	27.0333	33.7667	47.6333	75.6667	100.8	101.967	105.7
groom3 stops	-58.7667	-38.9667	-25.9667	-12.5667	4.7	8.96667	10.2333	26.1333	26.6	28.3333	34.0667	47.8333	76.4	101	102.167	106.467
walk3 starts
walk3 stops
probe5 starts
probe5 stops
fly2 starts
fly2 stops
mosquito 18
tracking gap starts:
tracking gap stops:
groom3 starts	-60	-59.2	-56.3	-51.2	-48.0333	-39.4	-37	-35.5	-33.9333	-29.1333	-27.9333	-23.7	-22.9667	-13.3333	-4.8	3.26667	7.86667	8.83333	10.8	14.3667	15.0667	16.3	18.3333	20.4667	25.4	27.2	29.2	32.1	34.7667	37.9	38.6667	42.7667	45.1667	46.1	47.0667	48.7333	49.6	51.4667	52	52.7667	55.4	58.5667	59.6	61.7	63.4667	76.2333	77.4	78.6667	79.5333
groom3 stops	-59.6	-59	-56.0667	-50.4333	-46.8	-38.2667	-36.7	-34.4667	-33.2667	-28.2	-27.5	-23.3667	-22.6333	-12.6333	-4.56667	3.73333	8.23333	9.06667	11.2667	14.7667	15.2667	16.5333	19.3667	23.2333	26.8667	27.5	30	33	36.7	38.1667	40.5667	43.4	45.5	46.3	47.2667	48.9667	50.7333	51.8	52.5667	53.1667	56.3333	59.2333	59.9333	62.7333	63.7	77.1667	77.6667	78.9	80.4
walk3 starts
walk3 stops
probe5 starts
probe5 stops
fly2 starts
fly2 stops
mosquito 19
tracking gap starts:
tracking gap stops:
groom3 starts
groom3 stops
walk3 starts	-2.23333
walk3 stops	-1.96667
probe5 starts
probe5 stops
fly2 starts
fly2 stops
mosquito 20
tracking gap starts:
tracking gap stops:
groom3 starts
groom3 stops
walk3 starts
walk3 stops
probe5 starts
probe5 stops
fly2 starts
fly2 stops
mosquito 21
tracking gap starts:
tracking gap stops:
groom3 starts
groom3 stops
walk3 starts
walk3 stops
probe5 starts
probe5 stops
fly2 starts
fly2 stops
mosquito 22
tracking gap starts:
tracking gap stops:
groom3 starts
groom3 stops
walk3 starts
walk3 stops
probe5 starts
probe5 stops
fly2 starts
fly2 stops
mosquito 23
tracking gap starts:
tracking gap stops:
groom3 starts
groom3 stops
walk3 starts
walk3 stops
probe5 starts
probe5 stops
fly2 starts
fly2 stops
Gr3 heat + light
mosquito 1
tracking gap starts:
tracking gap stops:
groom3 starts	12.9667	24.1667	68.1333	74.0333
groom3 stops	13.3667	24.4333	68.3667	74.5
walk3 starts	6.53333	8.86667	12.5	14.6667	21.5	31.1	40.3	42.0333	46.0667	61.8	66.0667	67.0667	67.6333	72.0333	73.1333	73.6	74.1333	75.3333	80.5667	88.5	94.5	108.633	114.533
walk3 stops	7.73333	11.5	14	20.9333	29.6	39.8333	41.4667	45.0333	50.5	65.3333	66.8333	67.2333	71.7333	72.8	73.3	73.9	74.6333	79.2667	83.4333	93.0667	103.7	113.767	120.033
probe5 starts	2.9	7.03333	10.3333	21.6	30.8667	34.0667	36.6667	39.1	44.6333	48.5333	72.2333	78.2667	79.6	82.6	89.1	98.8667	109.2	110.033	110.933	111.4
probe5 stops	3.63333	9.73333	21.4	25.4667	31.9667	35.2667	37.5333	42.4	45.6333	49.7	72.8	79.1333	81.1333	83.3333	90.0667	99.4	109.733	110.667	111.2	112.2
fly2 starts	2.9	3.63333
fly2 stops	3.6	3.7
mosquito 2
tracking gap starts:
tracking gap stops:
groom3 starts	-60	-58.8667	-55.0667	-54.1667	-53.3667	-50.3	-48.7	-41	-26.1667	-23.0333	-21.4333	-19.8333	-8.7	12.6333	28.5333	31.6667	59.8	73.7	75.5	77.5667	79.8	83.4	84.7	87.8333	89.5667	98.7	99.7	100.467	102	107.3	114.267
groom3 stops	-59.9	-56.0333	-54.5	-53.8	-52.3333	-49.7667	-42.1667	-28.1333	-25.9	-21.8333	-21.1	-12.9	-0.166667	12.9	28.9333	31.9333	60.7333	74.1	75.7667	78.4667	81.1333	84.4333	85.3667	88.1	90.3	99.3333	100.233	100.967	107.067	113.7	120.033
walk3 starts	5.33333	6.06667	6.5	7.96667	27.2	45.1333	49.1
walk3 stops	5.86667	6.26667	7.73333	8.2	27.4667	45.3	49.3667
probe5 starts	-56.2333	-27.2333	-11.4667	4.4	7.73333	22.8667	38.4667	43.8	46.8667	51.1333	68.7667	74.0667	87.5667	88.3	95.2667
probe5 stops	-56.0333	-26.5333	-10.9	5.76667	21.6667	29.3667	41.5	44.1333	47.0667	52.5667	69.3667	74.5667	87.9	88.6	95.6667
fly2 starts
fly2 stops
mosquito 3
tracking gap starts:
tracking gap stops:
groom3 starts
groom3 stops
walk3 starts	4.93333	7.83333	10	10.9667	12.8333	14.8	15.6667	16.5	20.0333	20.9667	32.7667	33.5667	54.6667	70.8	80.2333	84
walk3 stops	5.1	9.06667	10.7667	12.6333	13.9667	15.4667	16.3333	19.8333	20.2333	27.6667	33.3333	36.9667	55.1667	71.4333	81.8	92.3
probe5 starts	6.2	24.4333	32.3667	35	54.6	87.8667	89.8
probe5 stops	23.0667	28.6667	34.7333	35.5	56	88.2667	90.3667
fly2 starts
fly2 stops
mosquito 4
tracking gap starts:
tracking gap stops:
groom3 starts	-7	0.733333
groom3 stops	-6.66667	1.43333
walk3 starts	46.2	46.8	60.8667	69.7333	77	89.6667	97.3667	99.8333	109.967	111.633
walk3 stops	46.5667	59.5	69	76.3333	88.5	90.3667	98.7	109.767	111.3	112
probe5 starts	5.53333	9.73333	36.1667	44.4667	50.6667	54.1	66.1667	68	71.4	74.9	76.3667	79.9333	80.8667	86.5667	101.933	103.8
probe5 stops	9.46667	14.2333	36.4	45.8333	52.8667	57.1	66.5	68.3667	74.5	75.1	77.3333	80.4333	81.2667	86.8	102.133	104.7
fly2 starts	42.7	115.367
fly2 stops	43.2667	118.733
mosquito 5
tracking gap starts:
tracking gap stops:
groom3 starts	4.63333	40.6333	69.8	70.7667	75.7333	76.4667	96.5	102	111.933
groom3 stops	5.8	40.9	70.5	71.0333	76.1333	77.2667	96.9667	102.3	112.2
walk3 starts	4.26667	11.1667	15.5667	20.8667	26.0667	32.9667	86.7
walk3 stops	5.33333	15.2	17.2	25.6	32.7	34.6667	86.9333
probe5 starts	-53.9333	-21.2	-19.5333	-16.6333	-3.4	3.7	4.33333	5	6.7	7.53333	10.9333	13.9333	15.9667	17.1333	23.8333	25.2667	28.7333	29.4333	31.2	36.5	43.5667	83.8333	84.8	87.4667	88.3667	92.3333
probe5 stops	-53.6667	-20.8667	-18.9667	-16.2667	-3.2	3.96667	4.6	6.33333	6.93333	10.4	12.6333	14.3	16.3	17.4	24.1	26.3	29.1	29.8667	32	37.3	44.2	84.5333	85.9333	87.9	89.0333	93.4667
fly2 starts
fly2 stops
mosquito 6
tracking gap starts:
tracking gap stops:
groom3 starts	-60	-49.2667	-19.7333	-15.1667	-13.5333	-7.33333	7.8	10.3	21.4333	58.9667	60.3667	61.4	78.6	85.6333
groom3 stops	-50.1333	-19.9667	-19.4333	-13.8	-8.53333	-2.4	9.23333	10.8	22.2333	60.1333	61.2	61.8	78.8333	85.9
walk3 starts	0.7	2.86667	3.6	12.6333	14.4	41.0667	52.8667	54.0667	58.5	76.0333	78.5667	91.8333	93	98.9667	111.067	113.3	115.633
walk3 stops	2.63333	3.03333	5.16667	13.6333	19.1667	43.5667	53.9	57.2	59.0333	76.8	84.9	92.0333	98.4667	104.767	112.633	114.8	116.2
probe5 starts	14	43.2	49.0667	50.6	52.0333	52.8333	84.0667	86.8	89.4	114	115.033	117.833
probe5 stops	15.0333	46.1667	50.1	51.3	52.6	54.4	84.7667	87.7667	92.0333	114.233	116.567	120.033
fly2 starts	21.3	23.2333
fly2 stops	22.9	23.7333
mosquito 7
tracking gap starts:
tracking gap stops:
groom3 starts	-60	-37.8667	-37.3667	-26.1	-21.6	-20.2667	-15.6333	-15.0667	-0.3	1.83333	48.1667
groom3 stops	-44.8	-37.5667	-37.1667	-25.9	-21.3333	-16.5333	-15.4333	-0.5	0.833333	2.06667	48.8
walk3 starts	8	9.23333	21.1333	22.0333	36.0667	37.5333	39.0333	39.9667	49.1667	57.8333	88.7333	89.2667	90.3	96	97.4	103.6	104.7	112.367	115.5	117.133	119.567
walk3 stops	8.23333	14.4333	21.8333	22.2667	37	38.3667	39.7	40.5333	51.7333	59.2	88.9	89.5	91.1333	96.6333	100.167	103.867	107.067	113.9	116.033	119.1	119.8
probe5 starts	0.766667	1.36667	32.4667	57.9667	58.7	85.7	118.5
probe5 stops	0.966667	10	32.9667	58.4333	59.7333	86.5667	118.9
fly2 starts
fly2 stops
mosquito 8
tracking gap starts:
tracking gap stops:
groom3 starts	-60	-58.2	-37.4	-36.7	-32.3333	-21.3	0.866667	3.8	6.46667	8.3	9.76667	10.8333	13.0333	16.3667	20.9	35.5	36.4	43.4667	50.8667	52	53.6667	55.1	66.3667	70.8667	72.3667	73.2	74.5667	86.1667	89.3667	91.0333	92.3	96.0333	96.7333	97.6333	105.967	107.4
groom3 stops	-59.3	-37.9667	-37.0667	-35.5667	-22.1	0.266667	1.7	5.83333	7.93333	8.86667	10.3	11.0333	13.9333	20.7	24.8	35.8333	36.7333	43.8	51.2	52.3333	54.8667	55.5667	67.4667	71.4333	72.9667	73.6	81.7333	87.8333	90.0667	91.3667	93.5	96.2333	97.2	101.4	107.167	120.033
walk3 starts	-25.2667
walk3 stops	-24.8
probe5 starts	-33	5.13333	15.8333	26.0333	29.1333	31.4667	32.3	37.1667	39.1667	41.8333	44.3333	48.0667	51.1	54.9333	73.6333	88.3	96.2
probe5 stops	-32.4	5.36667	16.5	27.2	29.4	31.7	33.2333	37.7667	41.0333	42.1667	44.6	48.4667	51.6667	55.5333	73.8667	88.7333	96.5667
fly2 starts
fly2 stops
mosquito 9
tracking gap starts:
tracking gap stops:
groom3 starts	11.1333	49.7667	50.2333	53.8	59.7667	61.9333	65.5	68.2667	73	76.3	77.4	80.0333	86.6	92.6333	95.2667	97.8	99.1333	102.367	103.733	115.867	118.933
groom3 stops	11.3667	50.0333	52.8333	58.4	60.8333	64.9333	66.2333	70.6333	74.3	77.1333	77.7	80.6333	91.2333	92.8333	95.9667	98.1667	101.833	102.567	110.233	116.2	120.033
walk3 starts	7.9	19.8	24.5	41.2667	105.233
walk3 stops	9.06667	19.9667	24.8	42.1333	105.5
probe5 starts	6.6	10.1333	11.2333	13.3667	18.0667
probe5 stops	9.2	10.5	12.8333	16.4667	19.2667
fly2 starts	2.33333
fly2 stops	3.06667
mosquito 10
tracking gap starts:
tracking gap stops:
groom3 starts	7.96667	10.8	12.6	28.2667	41.8333	62.6	64.6	65.7	66.3	66.7333	79.9667	81.5667	82.0667	96.5333	97.7667
groom3 stops	8.23333	11.8667	27.6333	41.3667	62.1667	64.4	65.4333	66.0667	66.5	79.0667	80.8333	81.8667	96.2667	97.1333	120.033
walk3 starts	7.76667	11.7
walk3 stops	9.06667	12.2333
probe5 starts	8.5	30.2
probe5 stops	14.7	30.4667
fly2 starts
fly2 stops
mosquito 11
tracking gap starts:
tracking gap stops:
groom3 starts	-54.5	-52	-44.2333	-36.8333	-35.7667	-35.1667	-33.5333	-29.5667	-20.3	-16.6	-15.2667	-13.7	-6.36667	-3.03333	19.7667	32.7	46.9333	54.4333	70.6333	71.3667	71.9333	84.9	98.5	99.4667	106.533	108.533	110.133	113.067
groom3 stops	-54.2667	-44.5	-41.3667	-36.6	-35.4333	-34.5	-32.9	-23.3333	-18.2333	-16.2	-14.5333	-13.1667	-3.83333	1.63333	31.9667	46.7333	54.1667	60.7	70.9333	71.7	83.7667	98.1333	98.8667	99.7	106.867	109.8	111.067	120.033
walk3 starts	-10.6333	-7.83333	2.63333	9.93333	10.6	14.5	17.1333
walk3 stops	-10.2	-7.13333	2.86667	10.3333	12.6333	16.3	17.6333
probe5 starts	5.4
probe5 stops	10.2333
fly2 starts
fly2 stops
mosquito 12
tracking gap starts:
tracking gap stops:
groom3 starts	-60	-58.8	-56.9	-37.6667	-31.1333
groom3 stops	-59.7667	-58.2333	-43.4	-37.3333	-29.6
walk3 starts	-15.6333	2.5	42.1667	45.0667	84.9333
walk3 stops	-15.2667	5.7	42.5	45.2333	85.3
probe5 starts	-16.8	-15.2	4.4	7.93333
probe5 stops	-16.2333	-14.9333	6.93333	8.26667
fly2 starts
fly2 stops
mosquito 13
tracking gap starts:
tracking gap stops:
groom3 starts	7.46667	14.8	15.8667	18.9	29.7333	50.4	53.7	55.2333	62.8333	71.4667	79.8333	106.667	118.833
groom3 stops	9.3	15	16.7	19.8	30.9667	50.7667	54	56.1	63.3333	71.9333	81.2	106.867	119.267
walk3 starts	12.1667
walk3 stops	12.8
probe5 starts	7.33333	12.5667
probe5 stops	8.1	14.1667
fly2 starts	7.16667	7.23333
fly2 stops	7.2	8.43333
mosquito 14
tracking gap starts:
tracking gap stops:
groom3 starts	-58.8	-54.7	-52.7333	-46.9333	-31.8667	10.9	11.3333	12.6	13.8667	15.3	16.1333	24.8333	26.4	26.9667	28.2	30.7667	73.4333	80.4333	100.967
groom3 stops	-58	-53.1333	-50.7	-32.4	3.26667	11.1333	11.5667	13.5	14.9667	15.5333	17.4333	25.9333	26.7333	27.9	28.6667	72.9333	79.9667	95.1667	120.033
walk3 starts	-52	-24.8333	-10.1333
walk3 stops	-51.2333	-24.5333	-9.86667
probe5 starts	-46.6667	10.3
probe5 stops	-46.4667	11.1
fly2 starts
fly2 stops
mosquito 15
tracking gap starts:
tracking gap stops:
groom3 starts	-59.5667	-58.7333	-53.1	-52.3	-51.3667	-49.0667	-47.7333	-6.06667	-5.13333	43.8333	106.367
groom3 stops	-59	-53.3	-52.8667	-51.5667	-50.3667	-48.1	-8.33333	-5.83333	-4.4	44.3667	106.8
walk3 starts	12.4667
walk3 stops	25.7
probe5 starts	-4.06667
probe5 stops	-3.36667
fly2 starts
fly2 stops
mosquito 16
tracking gap starts:
tracking gap stops:
groom3 starts	4.8	8	9.3	12.6	13.5333	14.5	76.0667	82.5	86.3	86.9667	90.6	91.6	98.4667
groom3 stops	6.66667	8.63333	11.2	13.0333	14	15	76.2667	83	86.7	87.1667	91.2333	92.5667	99.7667
walk3 starts	1.63333	6.7	118.1
walk3 stops	3.36667	7.43333	118.5
probe5 starts	9.73333
probe5 stops	10.0333
fly2 starts
fly2 stops
mosquito 17
tracking gap starts:
tracking gap stops:
groom3 starts	118.967
groom3 stops	119.433
walk3 starts
walk3 stops
probe5 starts
probe5 stops
fly2 starts
fly2 stops
mosquito 18
tracking gap starts:
tracking gap stops:
groom3 starts	-17.2	36.7667
groom3 stops	-16.3667	37.0333
walk3 starts
walk3 stops
probe5 starts
probe5 stops
fly2 starts
fly2 stops
mosquito 19
tracking gap starts:
tracking gap stops:
groom3 starts	-36.2333	-34.5333	-29.3333	24.9333
groom3 stops	-35.6667	-34.1	-29.1333	25.1333
walk3 starts	-48.2	-36.2	-35.5333	-24.8	-22.3333	9	10.4333	11.3333	12.6	15.9333	20.3	21.0667	23.6	28.6	30.7	33.6667	35.4333	40.6667	41.7667	42.1667	44.0333	48.6	54.3	58.9667	59.5	60.4	76.5	79.7333	88.3667	94.1	96.6667	99.0667	99.4667	110.967	111.767	117.067
walk3 stops	-47.2333	-36.0333	-35.3667	-24.5333	-22.0333	9.36667	10.9667	11.7667	14.0333	17	20.5667	21.5	24	28.9667	32.7	34.3333	35.6667	41.3	41.9333	42.7333	44.2	48.8333	54.4667	59.2333	60.1667	60.9667	78.3333	79.9333	88.7667	94.3667	97	99.2667	100.9	111.533	113.267	117.4
probe5 starts
probe5 stops
fly2 starts
fly2 stops
mosquito 20
tracking gap starts:
tracking gap stops:
groom3 starts	-59.6667	-55.5	-30.1333	-27.2	-17.4333	-16.3667	-6.53333	-4.6	18.7667	20.0667	21.2667	44.0667	53.7	56.1667	101.633	119.067
groom3 stops	-56.0667	-32.4333	-27.5667	-17.6333	-17.0667	-8.2	-5.6	0.6	19.8667	20.3333	21.5333	45.0333	54.2333	56.6667	101.9	119.433
walk3 starts	-23.5333	-22.3	4.76667	13.6	15.2	41.9667	84.2333	92.4	112.833	119.433
walk3 stops	-23.3333	-21.9667	9.03333	13.9667	15.5	43.0333	92.1333	93.4333	115.833	120.033
probe5 starts
probe5 stops
fly2 starts	3.86667	39.4667	39.9
fly2 stops	4.26667	39.6333	40.0667
mosquito 21
tracking gap starts:
tracking gap stops:
groom3 starts
groom3 stops
walk3 starts	15.7667
walk3 stops	16.1667
probe5 starts
probe5 stops
fly2 starts	5.66667
fly2 stops	5.86667
mosquito 22
tracking gap starts:
tracking gap stops:
groom3 starts
groom3 stops
walk3 starts
walk3 stops
probe5 starts
probe5 stops
fly2 starts
fly2 stops
mosquito 23
tracking gap starts:
tracking gap stops:
groom3 starts
groom3 stops
walk3 starts
walk3 stops
probe5 starts
probe5 stops
fly2 starts
fly2 stops
CsChrimson heat
mosquito 1
tracking gap starts:
tracking gap stops:
groom3 starts	1.66667	8.56667
groom3 stops	2.36667	9.03333
walk3 starts	-60	-58.3667	-57.6	-55.6333	-53.6667	-49.1667	-46.2333	-45.8333	-38.1	-32.0333	-25	-18.7	-11.4	-11.0333	-9.33333	-8.3	-7	1.6	2.7	6.93333	16.7333	17.2333	18.8	20.2667	22.7	31.9667	50.9	63.3333	69.3333	76.1667	87.4	91.4333	97.8667	98.9	101.333	107.233
walk3 stops	-58.9667	-57.8333	-56.9667	-54.4667	-50.6	-46.7333	-46.0333	-38.2667	-36.2333	-31.7667	-22.9667	-11.9667	-11.2	-10.6333	-8.63333	-7.93333	-0.6	2.06667	5.7	8.8	16.9333	17.9	19.0667	22.3667	30.4667	42.7667	59.4667	66.8	74.9667	81.3	90.7333	92.2	98.4	99.9333	106.933	108.767
probe5 starts	-60	-55.7667	-54.9	-51.4333	-49.9333	5.93333	9.53333	10.5667	21.8667	38.4	40.4333	56.9667	64.0333	69.5667	88.2333
probe5 stops	-58.8333	-55.5333	-52.6333	-50.1333	-46	6.13333	10.0667	21	38.0333	39.4	42.3667	57.9667	64.2667	72.3333	88.7
fly2 starts	-57.0333	-56.4667	-22.5	-15.7333	-15.4667	-9	76.7333	88.1	88.3
fly2 stops	-56.6	-56.3333	-22.0333	-15.6	-15.4	-8	77.0333	88.2667	88.5333
mosquito 2
tracking gap starts:
tracking gap stops:
groom3 starts	-60	-56.5667	-51.6333	-43.9	-41.1	-32.9667	-25.0667	-17.5	-7.03333	-5.6
groom3 stops	-57.3	-52.3333	-45.5	-42	-34.8	-27.8667	-17.7667	-7.36667	-5.93333	-0.666667
walk3 starts	-24.2333	7.83333	10.7667	13.6667	14.5	15.0667	19.2667	20.5	28.2	28.6	30.5333	47.4	49.7667	60.1667	61.7	68.5333
walk3 stops	-23.8667	8.06667	11.4	14.1333	14.6667	18.0667	19.9333	22.3667	28.4333	28.7667	30.8333	48.2333	50	60.3667	61.9333	70.1
probe5 starts	0.266667	5.1	6.36667	8.13333	15.8667	16.7	18.5333	20.2667	24.6333	30.1667	31.2667	36.0333	39.7	44.5	67.9
probe5 stops	3.76667	5.43333	7.93333	13.2667	16.2	17.1667	20.0333	22.8	29.7333	31.0333	35.0333	39.2667	43.1	44.9667	68.4667
fly2 starts
fly2 stops
mosquito 3
tracking gap starts:
tracking gap stops:
groom3 starts	-60	-34.2333	3.36667	7.6	8.86667	23.5333	24.1333	25.4333	28.0333	53.1667
groom3 stops	-53.6667	-34.0333	7.16667	7.9	9.56667	23.8333	24.3333	25.6667	28.2667	54.0333
walk3 starts	-36.1	-32.5667	-29.0667	-24.3	14.2667	23.2333	27.9333	34.8333	42.1667	42.9333	45.5667	49.2	53.8667	62.8	69.5333	71.3	73.2333	75.5333	76.5	78.6	82.4	83.5333	85.2667	86.0333	95.7333	105.167	106.667	109.667	113.633
walk3 stops	-35.1333	-29.8	-28.7	-21.6	14.7333	27.6667	34.2	41.8667	42.7667	44.9667	48.0333	53.6	62.1667	63.2333	71	72.4667	75.0333	76.1667	77.9667	82	83.1667	84.2	85.8333	88.1667	97.2667	106.3	108.4	110.3	114.467
probe5 starts	-53.4	-50.4667	-49.1667	-46.3	-44.1333	-27.2333	14.4333	21.0667	23.2333	32.7667	33.7667	38.1333	47.5333	51.6333	80.7667
probe5 stops	-50.9333	-49.3667	-46.7667	-44.9667	-43.2	-27.0333	14.8667	21.2667	31.8333	33.0667	36.3667	42.6667	47.9667	52.8667	81
fly2 starts	-42.4333	-34.5333	62.9333	89.2
fly2 stops	-41.8667	-33.9667	63.7	90.2667
mosquito 4
tracking gap starts:
tracking gap stops:
groom3 starts	78.9333	95.3333
groom3 stops	79.1667	95.9667
walk3 starts	-57.4333	-50.6333	-44.1	-38.0333	-37.4667	-0.633333	0.5	4.06667	7.2	13.3	16.3667	24.4667	29.1667	30.4333	31.8667	32.4667	34.9333	36.0667	39.4333	43.9	45.3333	52.7	56.9333	58.5333	60.5333	61.7	64	79.6667	87.9	92.0667	93.0333	96.8333	98.3333	104.567
walk3 stops	-57	-49.8333	-43.9	-37.7333	-36.6667	0.2	1.86667	5.1	7.43333	14.1333	17.6333	27.9	29.4333	30.7	32.1	33.3667	35.4333	39	39.6333	44.8667	52.4667	56	57.2333	60.3667	60.7	62.8667	73.8	84.0667	88.2667	92.2333	94.5667	97.9333	103.933	108.267
probe5 starts	0.8	4.33333	6.26667	7.1	10.9	20.9333	21.4333	21.9	22.9667	25.1667	26.4	29.8333	31	33.8667	35.2333	38.5	44.2333	45.3667	54.9333	66.5667	78.4333
probe5 stops	3.66667	5.96667	6.83333	7.63333	17.7667	21.1667	21.6333	22.5	23.1667	25.8667	27.8333	30.7	31.3	34.9	36.0333	39	44.6	45.9667	56.6667	66.8	78.9667
fly2 starts	44.5	73.6667	77.4333	77.5667	84.5333	90.8333
fly2 stops	45.1	74.3667	77.5333	79.0333	85.2667	91.8
mosquito 5
tracking gap starts:
tracking gap stops:
groom3 starts	5.6
groom3 stops	6.46667
walk3 starts	-0.4	2.9	5.26667	6.53333	10.2	15
walk3 stops	2.16667	3.36667	6.1	6.76667	11.0333	16.1667
probe5 starts	4.13333	7.93333	12.5	15.8	21	24.8	32.2333	38.7333	47.7	59.1333
probe5 stops	4.4	12.3	14.8667	17.8333	24.5	27.6333	32.4333	39.1667	50.2333	59.4667
fly2 starts
fly2 stops
mosquito 6
tracking gap starts:
tracking gap stops:
groom3 starts	113.867
groom3 stops	114.2
walk3 starts	6.1	8.53333	19.4667
walk3 stops	6.63333	9.6	20
probe5 starts	5	23.9667	24.8333	25.3667	31.4333
probe5 stops	20.5	24.3	25.1667	25.6667	31.8333
fly2 starts
fly2 stops
mosquito 7
tracking gap starts:
tracking gap stops:
groom3 starts	-48.4	-4.83333	-3.83333
groom3 stops	-7.16667	-4.46667	-0.7
walk3 starts	-0.266667	2.4	5.4	7.96667	10.5333	11.9667	12.5667	17.0333	17.9	22.9667
walk3 stops	0.766667	3.43333	6.5	8.46667	11.5667	12.1667	12.9333	17.6667	22.1333	24.8333
probe5 starts	0.0666667	7.56667	9.86667	18.2667	23.4667	32.6667	36.9	91.4333	92.5667	93.2333
probe5 stops	3	9.03333	12	21.5333	24.7333	33.6667	39.8	91.7	92.8333	93.5
fly2 starts
fly2 stops
mosquito 8
tracking gap starts:
tracking gap stops:
groom3 starts	13.4667
groom3 stops	13.6667
walk3 starts	-29.7333	-27.0333	-13.2333	-3.16667	5.2	11.4	12	14.7	16.7	17.4	20.6333	22.4333	27	27.6	28.2667	30.1333	30.6333	33.6667	36.5667	37.4	39.9333	40.4667	40.8667	48.4	49.0667	107.433	108.133	113.067
walk3 stops	-29.3333	-26.8	-13.0667	-2.86667	10.7667	11.7	13.8667	16.1	17.2333	18.4	21.7333	23.6	27.1667	27.9	29.9333	30.4333	30.9667	36.1	36.7667	38.2333	40.1667	40.7	41.6667	48.7667	49.2333	107.6	109.867	114
probe5 starts	7.7	20.4333	108.3
probe5 stops	18.3	22.5667	108.633
fly2 starts
fly2 stops
mosquito 9
tracking gap starts:
tracking gap stops:
groom3 starts	-28.2	-22.8333	-20.1667	-12.9	-11.2	15.0667	24.5333	28.3	33.4333	38.2333
groom3 stops	-27.8	-20.5667	-19.8	-12.2333	-10.5333	15.6667	25	28.6	33.9667	38.8333
walk3 starts	-34.3333	-28.5	-27	-21.4333	9.06667	16.7	18.8333	23.2333	59.7	88.4333	91.3333	92.3333
walk3 stops	-33.7333	-27.4	-23.8333	-21.2333	9.56667	16.9667	23.0667	24	60.0333	89.0667	91.7667	93.1333
probe5 starts	19.3333	23.1	24.4333	25.5	30.6333	32.4333	59.1667	88.5
probe5 stops	22.7	23.3667	25.1333	29.2	32.2333	34.6667	59.4333	88.7333
fly2 starts	-26.8	-26.6	-20.9667	-13.1667
fly2 stops	-26.6333	-26.5667	-20.4667	-12.8667
mosquito 10
tracking gap starts:
tracking gap stops:
groom3 starts	-60	-50.3667	-40.2333	-38.2	-36.1333	-29.6333	-19.7667	-19.0667	-15.8333	-1.23333	1.26667	3.03333	5.2	23.6	43.5333	45.5	48.6667	49.1	52.3667	56.7333	62.9667	80.7667	81.3667	92.6	93.8667	96.8667	105.9	108.733
groom3 stops	-50.8333	-43.2	-38.5667	-37.9333	-34.9333	-29.2	-19.4333	-18.6	-1.66667	-0.466667	1.83333	3.26667	5.5	24.0667	44.0667	48.0667	48.8667	49.4667	54.7	61.3	63.9667	81.1333	90.9333	93.6	96.6333	105.667	106.6	120.033
walk3 starts	33.9333	78.8333
walk3 stops	34.1333	79.2
probe5 starts	-31.0333	3.13333	27.2	35.3	36.3333	44.5	55.3667	64.8667	69.6667	72.0667	78.8	80.7333
probe5 stops	-30.8333	5.8	28.1667	35.5	37.1667	44.7	56.0333	65.9	70.0333	74.9	79.3333	81.2333
fly2 starts
fly2 stops
mosquito 11
tracking gap starts:
tracking gap stops:
groom3 starts	-60	-53.5	-52.1333	-50.2333	-46.2333	-44.3	-43.8	-37.2	-24.8	-21.7333	-19.8667	-13.1	-3.2	-1.5	8.26667	14.3333	34.3333	36.1333	41.4333	43.3333	49.6667	56.1333	56.5667	62.4333	79.4	85.4667	88.1333	93.1667	97	104.1	108.133	109.633	110.8
groom3 stops	-54.3667	-52.6667	-51.3667	-49.4667	-44.5	-44.0667	-39	-25.9	-21.9333	-20.2667	-13.3333	-3.8	-1.86667	-1.06667	8.46667	14.5333	35.7	37.2	42.9667	45.4667	51.4333	56.3333	56.7667	67.5333	84.4667	87.7333	92.9333	96.7333	102.5	107.767	109.3	109.867	120.033
walk3 starts	-1.3	2.03333	6.73333	10	14.7667	16.0667	17.6667	21.3667	24.3667	26.9	30.2667	31.0333	54.6667	55.3667	68.4	70.4667	72.2	74.5333
walk3 stops	-0.366667	4.06667	6.93333	14.4667	15.6333	16.6667	18.0333	23.5667	25.5667	27.3	30.4667	33.2667	55.0333	55.5667	68.6	70.7667	73.4	74.7333
probe5 starts	-51.8333	0.0666667	3.6	5.23333	27.4	53.5	55.3333	62.5	68.1667
probe5 stops	-51.3667	0.266667	4.8	9.3	27.7333	54.7333	55.6333	62.7667	69.7333
fly2 starts
fly2 stops
mosquito 12
tracking gap starts:
tracking gap stops:
groom3 starts	-50.2667	-49.6	-31.9667	68.1333	70.6333	77.9	93.9	95.5333	101.1	114.833	115.767	116.833
groom3 stops	-49.8333	-49.4	-31.4333	69.0333	73.3333	87.1667	94.3667	95.7667	114.6	115.1	115.967	120.033
walk3 starts	0.533333	4.96667	7.13333	11.4	57.0667	87.1667	115.367
walk3 stops	4.73333	5.6	7.43333	12.3333	57.8	87.7333	115.833
probe5 starts	5.56667	9.3	13	58.5
probe5 stops	8.33333	10.5667	13.6333	58.9333
fly2 starts
fly2 stops
mosquito 13
tracking gap starts:
tracking gap stops:
groom3 starts	-60	-59	-54.8667	-50.0333	-44.9667	-42.2	-36.9	-34.6333	-32.3	-8.1	-2.56667	0.4	2.23333	3.8
groom3 stops	-59.4333	-55.1	-51.6333	-49.3333	-42.5	-38.0333	-34.8667	-33.9667	-31.5	-7.83333	-2.2	0.633333	2.76667	4.2
walk3 starts	-50.1667	-43.2	-39.4	-32.1667	-2.5
walk3 stops	-50	-42.4667	-38.9	-31.4	1.93333
probe5 starts	0.666667
probe5 stops	2.6
fly2 starts
fly2 stops
mosquito 14
tracking gap starts:
tracking gap stops:
groom3 starts	18.4333	29.7667	30.6333	42.4333	44.6333	47.9667	52.2	57.4667	59.0667	68.2667	78.2333	100.3	109.867	112.167	113.267	117.933
groom3 stops	18.7	30.4	30.8333	42.7	45	48.2	52.4667	58.7	59.3	68.5333	78.4333	101.967	110.8	112.367	114.5	118.267
walk3 starts	-0.3	4.1	12.0333	17.5667	24.9
walk3 stops	0.466667	5	15.1667	17.8667	25.6667
probe5 starts	15.5667
probe5 stops	15.9
fly2 starts
fly2 stops
mosquito 15
tracking gap starts:
tracking gap stops:
groom3 starts	41	63.4333	74.2667
groom3 stops	41.2	64.0333	74.4667
walk3 starts
walk3 stops
probe5 starts
probe5 stops
fly2 starts
fly2 stops
mosquito 16
tracking gap starts:
tracking gap stops:
groom3 starts	9.86667
groom3 stops	10.3
walk3 starts
walk3 stops
probe5 starts
probe5 stops
fly2 starts
fly2 stops
mosquito 17
tracking gap starts:
tracking gap stops:
groom3 starts	5.1	7.1	11.2667	14.3333	17.9333
groom3 stops	5.63333	9.46667	13.1667	14.6333	18.5333
walk3 starts	9.03333	14.3667
walk3 stops	9.76667	15.1333
probe5 starts
probe5 stops
fly2 starts	7.26667	7.36667	8.7	8.8	9.13333	14.2667
fly2 stops	7.3	8.63333	8.76667	9	9.33333	14.4667
mosquito 18
tracking gap starts:
tracking gap stops:
groom3 starts	-10.1333	-0.133333	0.433333	3.63333	5.36667	8.96667	9.83333	11.1333	12	28.7333	29.8333	30.4	31.8	32.4333	39.6	56.2333	71.7333	75.0667	108.533
groom3 stops	-9.8	0.133333	2.2	3.96667	5.73333	9.3	10.6667	11.5333	13.4	29.0667	30.1333	31.2667	32	33.2333	41.5667	56.4333	72.5333	75.5667	108.733
walk3 starts
walk3 stops
probe5 starts
probe5 stops
fly2 starts
fly2 stops
mosquito 19
tracking gap starts:
tracking gap stops:
groom3 starts	-43.5	-30.3333	-5.33333	9.13333	26.0333	37.5	91.5667	102.833
groom3 stops	-43	-29.8	-5.06667	9.76667	26.2333	37.9333	91.8667	103.567
walk3 starts
walk3 stops
probe5 starts
probe5 stops
fly2 starts
fly2 stops
mosquito 20
tracking gap starts:
tracking gap stops:
groom3 starts	-57.9333	-56.8333	-56.4	-54.4333	-48.2	-47.0667	-37.6333	-22.2333	-18.6	-15.1333	-13.8667	-10.4667	-8.3	-7.36667	1.9	4.7	8.36667	10	10.5	13.5333	15.8667	20.3333	21.2667	23.3667	25.8	28.6333	30.4	31.0667	32.2667	34.2	37.4	43.6667	53.3667	61.3	69.5333	88.1667	91.3	96.7667
groom3 stops	-57.6	-56.6333	-55.7667	-53.8	-47.8667	-46.6667	-36.5	-21.9667	-18.0667	-14.2	-12.5333	-10.2333	-7.96667	-6.63333	2.96667	5.7	8.96667	10.2667	11.4333	13.8	16.4333	21.0333	22.1667	25.3333	26.2333	29.0333	30.6333	31.5	33.5667	35.1	37.8667	44.3333	53.5667	61.7667	69.7667	88.7667	91.8333	97.8
walk3 starts
walk3 stops
probe5 starts
probe5 stops
fly2 starts
fly2 stops
mosquito 21
tracking gap starts:
tracking gap stops:
groom3 starts	-60	-54.3667	-53.2333	-52.3667	-51.0667	-45.5	-25.5	-16.3333	-1.26667	1.83333	6.36667	13.2333	48.7667	111.533	115.333
groom3 stops	-54.7	-53.9333	-52.6	-51.7	-45.9333	-27.1	-24.7667	-1.56667	-1.06667	2.26667	7	13.9	49.0333	112.667	118.833
walk3 starts	4.1	5.46667
walk3 stops	5.3	5.83333
probe5 starts
probe5 stops
fly2 starts
fly2 stops
mosquito 22
tracking gap starts:
tracking gap stops:
groom3 starts
groom3 stops
walk3 starts
walk3 stops
probe5 starts
probe5 stops
fly2 starts
fly2 stops
CsChrimson light
mosquito 1
tracking gap starts:
tracking gap stops:
groom3 starts	-60	-57.8333	-45.3	-42.7667	-42.2333	-41	-36.9333	-36.1	-34.5	-27.0333	-25.7	-21.2667	-20.4667	-17.2667	-14.4	-11.9333	-10.2333	-8.23333	-7.46667	-3.13333	-0.733333	3.1	17.5333	19.7667	24.9333	26.1333	27	40.6333	64.5667	65.4333	68	70.7667	77.3333	81.5667
groom3 stops	-58.7667	-57	-43.3	-42.5667	-42	-37.8667	-36.6667	-35.6333	-27.9333	-26.0333	-22.3667	-20.7667	-17.8333	-14.9667	-13.6667	-11.2	-9.96667	-7.93333	-4.86667	-1.1	2.53333	3.46667	17.7333	20.2667	25.3667	26.7333	27.9333	41.3	64.8667	67.7667	68.3333	71.0333	77.6667	81.8333
walk3 starts	-56.9667	-56.1	-54.2333	8.63333	9.16667	11.0333	12.4333	14	21.7	22.1	25.0667	41.3	61.5667	64.8667	65.3333	67.4667	68.0667	70.9333	72.3333	80.5	83.1	86.2333	87.4667	89.6667	98.4333	101.8	103.333	108	108.333	111.167
walk3 stops	-56.6333	-55.9	-48.8	8.9	10.8667	12.0333	12.8333	15.0333	21.9333	24.8667	25.2667	42.4	63.6667	65.0333	65.5	67.6667	69.9	72.1333	75.5667	80.7667	83.4	86.4	87.8	98.0333	100.433	103	103.633	108.167	109.267	111.933
probe5 starts	-55.5667	-51.7	-49.3667	-17.9	-13.2333	-7.36667	0.9	9.03333	26.3333	61.8	64	69.4	72.7333	83.4333	89.9333	91	94.3667	96	100.8
probe5 stops	-54	-51.4667	-46.5667	-17.4	-12.7333	-7.1	1.26667	11.4333	26.9	63.5	64.4333	72.3667	73.1667	83.8	90.2333	92.3	94.6667	96.4	101.233
fly2 starts	21	26.3667	79	83.3333	83.4	100.367
fly2 stops	21.9	28.8	79.7333	83.3667	84.7667	100.833
mosquito 2
tracking gap starts:
tracking gap stops:
groom3 starts	-60	39.3667	51.2	52	52.6667	56.9333	61.6333	64.8	76.4667	79	80.9667	84.5333	92.8333	96.1	99.1	106.633	107.533	112.833	115.2	117.2
groom3 stops	-59.6333	40.7333	51.7667	52.3667	54.9333	61.3333	62.8667	76.2667	78.5667	79.2333	84.3	91.5667	95.6333	97.6	105.4	107.033	110.967	114.9	115.433	120.033
walk3 starts	89.5667
walk3 stops	89.9333
probe5 starts	-60	-57.1	-55.8	-44.8333	-40.2
probe5 stops	-59.7667	-56.1333	-54.4	-40.8333	-39.8
fly2 starts
fly2 stops
mosquito 3
tracking gap starts:
tracking gap stops:
groom3 starts	-60	2.4	3.66667	6.1	7.56667	13.8	18.0667	18.6667	62.6
groom3 stops	1.8	3.3	3.86667	7.2	8.16667	14.5667	18.3	19.1	62.9
walk3 starts
walk3 stops
probe5 starts	1.7	3	5
probe5 stops	2.1	4.76667	5.7
fly2 starts
fly2 stops
mosquito 4
tracking gap starts:
tracking gap stops:
groom3 starts	-12.8667	-12.4333	-9.2	-1.86667	-1.03333	0.966667	1.76667	3.73333	8.63333	9.73333	53.1667	54.7667
groom3 stops	-12.6333	-12.2333	-8.9	-1.6	0.533333	1.36667	3.36667	8.4	8.86667	10.0667	53.4	55
walk3 starts	29.2	30.6	32.3	40.3333	47.7667	53.4667	77.6333	78.7	92.0333	93.6	96.2	99	101.7
walk3 stops	30.3667	30.9	38.4333	46.7	48.1	53.6333	78	80.2667	92.7333	94.8667	97.7	100.067	103.433
probe5 starts	31.5667	45.8333
probe5 stops	31.9667	47.2333
fly2 starts	11.3
fly2 stops	12.2
mosquito 5
tracking gap starts:
tracking gap stops:
groom3 starts	-59.7333	-53.6	-42.7667	-41.5667	-36.5	-28.6333	-16.3667	-8.23333	-6.83333	3	32.1	65.6667
groom3 stops	-54.2333	-42.9667	-41.8333	-37.0667	-29.1667	-19.4333	-8.6	-7.36667	2.03333	5.36667	32.3333	65.9
walk3 starts
walk3 stops
probe5 starts	12.3667
probe5 stops	13.3
fly2 starts
fly2 stops
mosquito 6
tracking gap starts:
tracking gap stops:
groom3 starts	-60	-56.0667	-54.7333	-52.5333	-51.9	-50.5	-41.4667	-36.8333	-33.3667
groom3 stops	-57.3333	-54.9333	-52.9	-52.2333	-51.1333	-48.2333	-37.8333	-33.9667	78.8667
walk3 starts
walk3 stops
probe5 starts	-43.9333
probe5 stops	-43.5667
fly2 starts
fly2 stops
mosquito 7
tracking gap starts:
tracking gap stops:
groom3 starts	-60	-33.2333	-19.9333	-18.7	-17.5	12.3333	16.5	81.1333	116.367
groom3 stops	-34.1667	-20.5667	-19.6	-18.3	10.9	16.2	79.5333	116.067	120.033
walk3 starts
walk3 stops
probe5 starts	-35.5667
probe5 stops	-35.3667
fly2 starts
fly2 stops
mosquito 8
tracking gap starts:
tracking gap stops:
groom3 starts	94.6667	109.767	112.867
groom3 stops	95.2	110.067	113.267
walk3 starts
walk3 stops
probe5 starts
probe5 stops
fly2 starts
fly2 stops
mosquito 9
tracking gap starts:
tracking gap stops:
groom3 starts	9.4	110.333	114.733	117.233
groom3 stops	9.76667	110.6	115.3	117.9
walk3 starts	112.567	117.767	118.3
walk3 stops	117.333	117.933	120.033
probe5 starts
probe5 stops
fly2 starts	109.867
fly2 stops	110.8
mosquito 10
tracking gap starts:
tracking gap stops:
groom3 starts	6.4	17.2	86.1
groom3 stops	6.63333	17.9	86.3667
walk3 starts
walk3 stops
probe5 starts
probe5 stops
fly2 starts
fly2 stops
mosquito 11
tracking gap starts:
tracking gap stops:
groom3 starts	-19.8667	-15.7	10.3667	27.9	32.6667
groom3 stops	-19.2	-15.2667	10.8333	28.4	33.2333
walk3 starts
walk3 stops
probe5 starts
probe5 stops
fly2 starts
fly2 stops
mosquito 12
tracking gap starts:
tracking gap stops:
groom3 starts	-34.5667	23.7333	42.6667	51.3667	102.233
groom3 stops	-34.3667	24.2333	43.1333	51.7	102.533
walk3 starts	30.2667
walk3 stops	30.5667
probe5 starts
probe5 stops
fly2 starts
fly2 stops
mosquito 13
tracking gap starts:
tracking gap stops:
groom3 starts	-49.6333	-46.1667	-18.4667
groom3 stops	-49.3667	-45.8	-18.1667
walk3 starts
walk3 stops
probe5 starts
probe5 stops
fly2 starts
fly2 stops
mosquito 14
tracking gap starts:
tracking gap stops:
groom3 starts	-59.4667	-58.8333	-55.8	-52.9333	-51.4	-48.3667	-45.2333	-38.7667	-37.5333	-33.9333	-33.1333	-25.1333	-23.2667	-16.3	-13.4	-12.5667	-11.0667	-8.03333	-7.4	-5.9	-4.8	-0.833333	2.96667	7.06667	12.7	17.4667	23.7333	25.0667
groom3 stops	-59.0333	-56.8333	-53.3	-52.5333	-49.7333	-47.8333	-44.1333	-37.8	-36.3	-33.4333	-32.5667	-24.5	-22.6	-15.1667	-12.8667	-12.3	-10.6667	-7.76667	-6.46667	-5.36667	-4.06667	-0.166667	3.7	7.26667	13.1	17.6667	24	25.3667
walk3 starts
walk3 stops
probe5 starts
probe5 stops
fly2 starts
fly2 stops
mosquito 15
tracking gap starts:
tracking gap stops:
groom3 starts	-60	-33.7	-16.5667	-6.06667	1.83333	3.33333	8.4
groom3 stops	-34.9333	-17.1333	-9.53333	1.4	3.1	5.23333	8.66667
walk3 starts	-15.6333
walk3 stops	-15.4333
probe5 starts
probe5 stops
fly2 starts
fly2 stops
mosquito 16
tracking gap starts:
tracking gap stops:
groom3 starts	-60	-54.1333	-53.0333	-43.9333	-21.5333	13.7	32.5333	34.6	40.1	43.8333	77.9667	90.1	91.8	94.0667	105.5	110.433	111.333	114.833	115.8
groom3 stops	-54.4333	-53.7	-47.6667	-21.8	4.56667	31.0333	32.9333	34.9	41.3333	44.1667	78.2333	90.4333	92.1667	94.2667	105.833	111	111.767	115.067	116.033
walk3 starts
walk3 stops
probe5 starts
probe5 stops
fly2 starts
fly2 stops
mosquito 17
tracking gap starts:
tracking gap stops:
groom3 starts
groom3 stops
walk3 starts	62.1333	77.4	94.9667	110.867
walk3 stops	62.4667	77.7667	95.2333	111.133
probe5 starts
probe5 stops
fly2 starts
fly2 stops
mosquito 18
tracking gap starts:
tracking gap stops:
groom3 starts
groom3 stops
walk3 starts	-46.2667	-41.9333	-37.6333	10.3	79.9333
walk3 stops	-46.1	-41.7667	-37.1667	10.4667	80.2333
probe5 starts
probe5 stops
fly2 starts
fly2 stops
mosquito 19
tracking gap starts:
tracking gap stops:
groom3 starts
groom3 stops
walk3 starts
walk3 stops
probe5 starts
probe5 stops
fly2 starts
fly2 stops
mosquito 20
tracking gap starts:
tracking gap stops:
groom3 starts
groom3 stops
walk3 starts
walk3 stops
probe5 starts
probe5 stops
fly2 starts
fly2 stops
mosquito 21
tracking gap starts:
tracking gap stops:
groom3 starts
groom3 stops
walk3 starts
walk3 stops
probe5 starts
probe5 stops
fly2 starts
fly2 stops
[truncated: 1,038 more rows]
[truncated: 28 more columns]

## Sheet: Figure 2F
Figure 2F
behavior_prop	stimulus		behavior_prop	stimulus		behavior_prop	stimulus
0	LVP_heat		0.0203333	LVP_light		0.432444	LVP_comb
0	Gr3_heat		0	Gr3_light		0	Gr3_comb
0.00244444	CsC_heat		0.0767778	CsC_light		0	CsC_comb
0	DP_heat		0.00377778	DP_light		0.287444	DP_comb
0.184556	LVP_heat		0.002	LVP_light		0.000666667	LVP_comb
0.0618889	Gr3_heat		0.00511111	Gr3_light		0.00866667	Gr3_comb
0.0842222	CsC_heat		0	CsC_light		0	CsC_comb
0.00566667	DP_heat		0.373778	DP_light		0.394556	DP_comb
0	LVP_heat		0.0134444	LVP_light		0	LVP_comb
0.017	Gr3_heat		0	Gr3_light		0.0735556	Gr3_comb
0.0637778	CsC_heat		0	CsC_light		0	CsC_comb
0.0293333	DP_heat		0.0205556	DP_light		0.000777778	DP_comb
0.143444	LVP_heat		0	LVP_light		0.159111	LVP_comb
0.0161111	Gr3_heat		0.0546667	Gr3_light		0.0225556	Gr3_comb
0.00644444	CsC_heat		0	CsC_light		0.594222	CsC_comb
0	DP_heat		0.0642222	DP_light		0.0731111	DP_comb
0.0656667	LVP_heat		0	LVP_light		0.00444444	LVP_comb
0.105667	Gr3_heat		0.0333333	Gr3_light		0.0142222	Gr3_comb
0.0165556	CsC_heat		0.0403333	CsC_light		0.00311111	CsC_comb
0.0104444	DP_heat		0.359	DP_light		0.541222	DP_comb
0.0498889	LVP_heat		0	LVP_light		0.0151111	LVP_comb
0	Gr3_heat		0.158111	Gr3_light		0	Gr3_comb
0	CsC_heat		0	CsC_light		0.00955556	CsC_comb
0.0384444	DP_heat		0.447667	DP_light		0.215889	DP_comb
0	LVP_heat		0	LVP_light		0.0374444	LVP_comb
0.00644444	Gr3_heat		0.0217778	Gr3_light		0.0206667	Gr3_comb
0.0463333	CsC_heat		0	CsC_light		0.0118889	CsC_comb
0.00111111	DP_heat		0.877889	DP_light		0	DP_comb
0	LVP_heat		0	LVP_light		0.321333	LVP_comb
0.138778	Gr3_heat		0.00111111	Gr3_light		0.00211111	Gr3_comb
0	CsC_heat		0.0316667	CsC_light		0.215556	CsC_comb
0.00144444	DP_heat		0	DP_light		0.0505556	DP_comb
0.284	LVP_heat		0.00233333	LVP_light		0.0535556	LVP_comb
0.00488889	Gr3_heat		0.222556	Gr3_light		0.0782222	Gr3_comb
0.0537778	CsC_heat		0	CsC_light		0.365444	CsC_comb
0.0133333	DP_heat		0.564889	DP_light		0.489556	DP_comb
0.000777778	LVP_heat		0.0165556	LVP_light		0.0536667	LVP_comb
0	Gr3_heat		0.00111111	Gr3_light		0	Gr3_comb
0	CsC_heat		0	CsC_light		0.0792222	CsC_comb
0.042	DP_heat		0.34	DP_light		0.161556	DP_comb
0.0263333	LVP_heat		0.0167778	LVP_light		0.251444	LVP_comb
0.00222222	Gr3_heat		0.0402222	Gr3_light		0.0977778	Gr3_comb
0.526333	CsC_heat		0	CsC_light		0.504889	CsC_comb
0	DP_heat		0.615222	DP_light		0.344667	DP_comb
0.0435556	LVP_heat		0.0767778	LVP_light		0.0636667	LVP_comb
0	Gr3_heat		0.0788889	Gr3_light		0.147667	Gr3_comb
0	CsC_heat		0.0163333	CsC_light		0.00344444	CsC_comb
0.144778	DP_heat		0.0417778	DP_light		0.00866667	DP_comb
0.00511111	LVP_heat		0.00488889	LVP_light		0	LVP_comb
0.0118889	Gr3_heat		0	Gr3_light		0	Gr3_comb
0	CsC_heat		0.366222	CsC_light		0.0502222	CsC_comb
0.0644444	DP_heat		0	DP_light		0.292	DP_comb
0.00433333	LVP_heat		0.0497778	LVP_light		0.0184444	LVP_comb
0.0735556	Gr3_heat		0	Gr3_light		0	Gr3_comb
0	CsC_heat		0	CsC_light		0.00888889	CsC_comb
0.00444444	DP_heat		0.388444	DP_light		0.538	DP_comb
0	LVP_heat		0.00944444	LVP_light		0	LVP_comb
0.00555556	Gr3_heat		0	Gr3_light		0.00277778	Gr3_comb
0	CsC_heat		0	CsC_light		0	CsC_comb
0	DP_heat		0.371222	DP_light		0	DP_comb
0.033	LVP_heat		0.00211111	LVP_light		0.0191111	LVP_comb
0.00311111	Gr3_heat		0.0157778	Gr3_light		0.00955556	Gr3_comb
0.0721111	CsC_heat		0	CsC_light		0.00822222	CsC_comb
0.0627778	DP_heat		0.140444	DP_light		0	DP_comb
0	LVP_heat		0.001	LVP_light		0	LVP_comb
0	Gr3_heat		0.00211111	Gr3_light		0	Gr3_comb
0	CsC_heat		0.00144444	CsC_light		0.0276667	CsC_comb
0.0523333	DP_heat		0.0551111	DP_light		0.0361111	DP_comb
0	LVP_heat		0	LVP_light		0.23	LVP_comb
0	Gr3_heat		0	Gr3_light		0.00255556	Gr3_comb
0.00866667	CsC_heat		0.121111	CsC_light		0.280889	CsC_comb
0	DP_heat		0.406889	DP_light		0.0122222	DP_comb
0.299889	LVP_heat		0.00455556	LVP_light		0.241556	LVP_comb
0.164889	Gr3_heat		0	Gr3_light		0.025	Gr3_comb
0.0251111	CsC_heat		0	CsC_light		0.0944444	CsC_comb
0.00122222	DP_heat		0.0573333	DP_light		0.492333	DP_comb
0.354556	LVP_heat		0	LVP_light		0.0152222	LVP_comb
0.114444	Gr3_heat		0.00711111	Gr3_light		0	Gr3_comb
0.261667	CsC_heat		0	CsC_light		0.409111	CsC_comb
0.199778	DP_heat		0.671333	DP_light		0	DP_comb
0.00322222	LVP_heat		0.246444	LVP_light		0.148444	LVP_comb
0.0343333	Gr3_heat		0	Gr3_light		0.397556	Gr3_comb
0	CsC_heat		0	CsC_light		0.00111111	CsC_comb
0.00822222	DP_heat		0.447444	DP_light		0.0121111	DP_comb
0	LVP_heat		0	LVP_light		0	LVP_comb
0.00255556	Gr3_heat		0.0154444	Gr3_light		0.211222	Gr3_comb
0.036	CsC_heat		0	CsC_light		0.375333	CsC_comb
0.0161111	DP_heat		0	DP_light		0.492556	DP_comb
0	LVP_heat		0	LVP_light		0.24	LVP_comb
0	Gr3_heat		0	Gr3_light		0.136444	Gr3_comb
0.149	CsC_heat		0	CsC_light		0.0101111	CsC_comb
0.0103333	DP_heat		0.201	DP_light		0.368111	DP_comb
0	LVP_heat		0	LVP_light		0.0211111	LVP_comb
0	Gr3_heat		0.0213333	Gr3_light		0	Gr3_comb
0.0198889	CsC_heat		0	CsC_light		0.0436667	CsC_comb
0.00477778	DP_heat		0.450444	DP_light		0.180778	DP_comb
0	LVP_heat		0	LVP_light		0.158	LVP_comb
0.00222222	Gr3_heat		0.00211111	Gr3_light		0.0252222	Gr3_comb
0.226222	CsC_heat		0	CsC_light		0.129889	CsC_comb
0.0905556	DP_heat		0.211889	DP_light		0	DP_comb
0.00322222	LVP_heat		0	LVP_light		0	LVP_comb
0.0111111	Gr3_heat		0	Gr3_light		0.0893333	Gr3_comb
0.0611111	CsC_heat		0.0693333	CsC_light		0	CsC_comb
0.0614444	DP_heat		0	DP_light		0.283889	DP_comb
0	LVP_heat		0.120667	LVP_light		0.122889	LVP_comb
0.0871111	Gr3_heat		0.0168889	Gr3_light		0	Gr3_comb
0.00855556	CsC_heat		0.215667	CsC_light		0.0112222	CsC_comb
0.00311111	DP_heat		0.011	DP_light		0.0423333	DP_comb
0.00911111	LVP_heat		0.00644444	LVP_light		0.00988889	LVP_comb
0.01	Gr3_heat		0	Gr3_light		0.0165556	Gr3_comb
0.00477778	CsC_heat		0	CsC_light		0.0197778	CsC_comb
0.000666667	DP_heat		0.618667	DP_light		0.000666667	DP_comb
0	LVP_heat		0.00377778	LVP_light		0.017	LVP_comb
0	Gr3_heat		0.0436667	Gr3_light		0.00833333	Gr3_comb
0	CsC_heat		0.341778	CsC_light		0.0283333	CsC_comb
0.00644444	DP_heat		0	DP_light		0.292333	DP_comb
0.171667	LVP_heat		0.0253333	LVP_light		0.00111111	LVP_comb
0.075	Gr3_heat		0.00611111	Gr3_light		0	Gr3_comb
0.434222	CsC_heat		0.00511111	CsC_light		0.0136667	CsC_comb
0.427111	DP_heat		0.117778	DP_light		0	DP_comb
0.00688889	LVP_heat		0	LVP_light		0.445222	LVP_comb
0.000555556	Gr3_heat		0	Gr3_light		0	Gr3_comb
0.285667	CsC_heat		0	CsC_light		0.0805556	CsC_comb
0	DP_heat		0.0992222	DP_light		0.372667	DP_comb
0.0675556	LVP_heat		0	LVP_light		0.300556	LVP_comb
0.0173333	Gr3_heat		0	Gr3_light		0.187444	Gr3_comb
0.0248889	CsC_heat		0	CsC_light		0.234778	CsC_comb
0.0372222	DP_heat		0.0141111	DP_light		0.144	DP_comb
0.0138889	LVP_heat		0	LVP_light		0.0978889	LVP_comb
0.00833333	Gr3_heat		0.0104444	Gr3_light		0.0333333	Gr3_comb
0.173111	CsC_heat		0.000555556	CsC_light		0.334	CsC_comb
0.0107778	DP_heat		0.154778	DP_light		0.380667	DP_comb
0	LVP_heat		0.0181111	LVP_light		0.0228889	LVP_comb
0.0234444	Gr3_heat		0.008	Gr3_light		0.00688889	Gr3_comb
0.18	CsC_heat		0	CsC_light		0.0897778	CsC_comb
0.384	DP_heat		0.159667	DP_light		0.178444	DP_comb
0	LVP_heat		0.00355556	LVP_light		0	LVP_comb
0	Gr3_heat		0	Gr3_light		0.0144444	Gr3_comb
0.00577778	CsC_heat		0	CsC_light		0.489889	CsC_comb
0.0304444	DP_heat		0.0202222	DP_light		0.173444	DP_comb
0.271333	LVP_heat		0.000888889	LVP_light		0	LVP_comb
0.206333	Gr3_heat		0	Gr3_light		0.0121111	Gr3_comb
0	CsC_heat		0.000777778	CsC_light		0.345111	CsC_comb
0.000555556	DP_heat		0.356778	DP_light		0.000666667	DP_comb
0.327556	LVP_heat		0.003	LVP_light		0.502222	LVP_comb
0.0233333	Gr3_heat		0	Gr3_light		0.0208889	Gr3_comb
0.322444	CsC_heat		0.0807778	CsC_light		0.00477778	CsC_comb
0.000888889	DP_heat		0	DP_light		0.395	DP_comb
0.000555556	LVP_heat		0.000666667	LVP_light		0.00222222	LVP_comb
0.00355556	Gr3_heat		0	Gr3_light		0.009	Gr3_comb
0.128111	CsC_heat		0.008	CsC_light		0.359111	CsC_comb
0	DP_heat		0.779889	DP_light		0	DP_comb
0	LVP_heat		0.00322222	LVP_light		0.00255556	LVP_comb
0.00388889	Gr3_heat		0	Gr3_light		0	Gr3_comb
0.00111111	CsC_heat		0.0228889	CsC_light		0.438556	CsC_comb
0	DP_heat		0.549667	DP_light		0.248889	DP_comb
0.08	LVP_heat		0	LVP_light		0.00144444	LVP_comb
0	Gr3_heat		0.00822222	Gr3_light		0	Gr3_comb
0.137333	CsC_heat		0.00222222	CsC_light		0.545111	CsC_comb
0.0106667	DP_heat		0.03	DP_light		0.00477778	DP_comb
0.0226667	LVP_heat		0	LVP_light		0.354889	LVP_comb
0	Gr3_heat		0.00411111	Gr3_light		0.0667778	Gr3_comb
0.00911111	CsC_heat		0	CsC_light		0.0155556	CsC_comb
0	DP_heat		0	DP_light		0.241778	DP_comb
0	LVP_heat		0.00155556	LVP_light		0.119222	LVP_comb
0	Gr3_heat		0	Gr3_light		0	Gr3_comb
0	CsC_heat		0	CsC_light		0.0153333	CsC_comb
0.0288889	DP_heat		0.410556	DP_light		0.466333	DP_comb
0.0117778	LVP_heat		0.0115556	LVP_light		0.0638889	LVP_comb
0.00744444	Gr3_heat		0	Gr3_light		0.0174444	Gr3_comb
0	CsC_heat		0.0431111	CsC_light		0.0677778	CsC_comb
0.0106667	DP_heat		0.012	DP_light		0.310222	DP_comb
0.103889	LVP_heat		0.000777778	LVP_light		0.299	LVP_comb
0.0641111	Gr3_heat		0	Gr3_light		0.464222	Gr3_comb
0.0185556	CsC_heat		0.117444	CsC_light		0.215222	CsC_comb
0.131444	DP_heat		0.158556	DP_light		0.222889	DP_comb
0.365889	LVP_heat		0.0313333	LVP_light		0.0168889	LVP_comb
0.000888889	Gr3_heat		0.0113333	Gr3_light		0	Gr3_comb
0.00344444	CsC_heat		0	CsC_light		0.244556	CsC_comb
0.0225556	DP_heat		0.180222	DP_light		0.554778	DP_comb
0.181444	LVP_heat		0.00888889	LVP_light		0.169222	LVP_comb
0.00177778	Gr3_heat		0	Gr3_light		0.0892222	Gr3_comb
0.183111	CsC_heat		0.008	CsC_light		0.254444	CsC_comb
0	DP_heat		0.415556	DP_light		0	DP_comb
0.012	LVP_heat		0.0664444	LVP_light		0.0348889	LVP_comb
0.0382222	Gr3_heat		0	Gr3_light		0.0592222	Gr3_comb
0.0523333	CsC_heat		0.000888889	CsC_light		0.0178889	CsC_comb
0.0595556	DP_heat		0.376889	DP_light		0.493	DP_comb
0.129556	LVP_heat		0	LVP_light		0.0325556	LVP_comb
0.00344444	Gr3_heat		0.0127778	Gr3_light		0	Gr3_comb
0.002	CsC_heat		0.0927778	CsC_light		0.182444	CsC_comb
0	DP_heat		0.417889	DP_light		0.428444	DP_comb
0.447444	LVP_heat		0	LVP_light		0.0401111	LVP_comb
0	Gr3_heat		0	Gr3_light		0	Gr3_comb
0.0227778	CsC_heat		0	CsC_light		0	CsC_comb
0.0234444	DP_heat		0.001	DP_light		0.0903333	DP_comb
0.187556	LVP_heat		0	LVP_light		0.217889	LVP_comb
0.0316667	Gr3_heat		0	Gr3_light		0.0243333	Gr3_comb
0.00322222	CsC_heat		0	CsC_light		0.0328889	CsC_comb
0.0238889	DP_heat		0.560444	DP_light		0.222333	DP_comb
0.0991111	LVP_heat		0	LVP_light		0.100778	LVP_comb
0.111444	Gr3_heat		0	Gr3_light		0.0298889	Gr3_comb
0.231667	CsC_heat		0	CsC_light		0.322667	CsC_comb
0.027	DP_heat		0.248111	DP_light		0	DP_comb
0.0822222	LVP_heat		0.0353333	LVP_light		0.00255556	LVP_comb
0.0193333	Gr3_heat		0	Gr3_light		0.0336667	Gr3_comb
0.206333	CsC_heat		0.183	CsC_light		0.00255556	CsC_comb
0	DP_heat		0.046	DP_light		0	DP_comb
0.156222	LVP_heat		0.00455556	LVP_light		0.190333	LVP_comb
0.235111	Gr3_heat		0.00733333	Gr3_light		0.0434444	Gr3_comb
0.085	CsC_heat		0	CsC_light		0.003	CsC_comb
0.0122222	DP_heat		0.430444	DP_light		0.214333	DP_comb
0.063	LVP_heat		0.0555556	LVP_light		0	LVP_comb
0	Gr3_heat		0	Gr3_light		0.017	Gr3_comb
0.005	CsC_heat		0	CsC_light		0.0936667	CsC_comb
0.005	DP_heat		0.547778	DP_light		0.388444	DP_comb
0.00888889	LVP_heat		0	LVP_light		0.00311111	LVP_comb
0	Gr3_heat		0	Gr3_light		0.0124444	Gr3_comb
0	CsC_heat		0.00666667	CsC_light		0.0108889	CsC_comb
0.0382222	DP_heat		0.132778	DP_light		0.233222	DP_comb
0.0105556	LVP_heat		0	LVP_light		0.101667	LVP_comb
0	Gr3_heat		0.002	Gr3_light		0.000666667	Gr3_comb
0.0494444	CsC_heat		0	CsC_light		0.0443333	CsC_comb
0.0103333	DP_heat		0.00988889	DP_light		0.633111	DP_comb
0.000555556	LVP_heat		0	LVP_light		0	LVP_comb
0.0616667	Gr3_heat		0.036	Gr3_light		0.129444	Gr3_comb
0.150667	CsC_heat		0	CsC_light		0.0132222	CsC_comb
0.0114444	DP_heat		0.220111	DP_light		0.127	DP_comb
0.322333	LVP_heat		0.257889	LVP_light		0.0575556	LVP_comb
0.0203333	Gr3_heat		0.000777778	Gr3_light		0.0877778	Gr3_comb
0	CsC_heat		0	CsC_light		0.190556	CsC_comb
0	DP_heat		0.116333	DP_light		0.343667	DP_comb
0	LVP_heat		0.001	LVP_light		0.297889	LVP_comb
0.006	Gr3_heat		0	Gr3_light		0.0821111	Gr3_comb
0	CsC_heat		0.119556	CsC_light		0.00611111	CsC_comb
0.0417778	DP_heat		0.395444	DP_light		0.249556	DP_comb
0.0237778	LVP_heat		0.005	LVP_light		0.0294444	LVP_comb
0.015	Gr3_heat		0	Gr3_light		0	Gr3_comb
0.0276667	CsC_heat		0	CsC_light		0.00866667	CsC_comb
0	DP_heat		0.247222	DP_light		0.291111	DP_comb
0	LVP_heat		0	LVP_light		0.239556	LVP_comb
0.105222	Gr3_heat		0	Gr3_light		0.199222	Gr3_comb
0.001	CsC_heat		0.0157778	CsC_light		0.294	CsC_comb
0.0866667	DP_heat		0.378667	DP_light		0.433222	DP_comb
0.00155556	LVP_heat		0.00311111	LVP_light		0.0456667	LVP_comb
0	Gr3_heat		0	Gr3_light		0.181889	Gr3_comb
0.00522222	CsC_heat		0.002	CsC_light		0.0363333	CsC_comb
0.138889	DP_heat		0.728	DP_light		0	DP_comb
0	LVP_heat		0.00411111	LVP_light		0.0575556	LVP_comb
0	Gr3_heat		0	Gr3_light		0.0992222	Gr3_comb
0.00488889	CsC_heat		0.00133333	CsC_light		0.178333	CsC_comb
0.417889	DP_heat		0.635111	DP_light		0.110889	DP_comb
0.139111	LVP_heat		0.0118889	LVP_light		0.334444	LVP_comb
0.229556	Gr3_heat		0	Gr3_light		0.00133333	Gr3_comb
0.0391111	CsC_heat		0.00155556	CsC_light		0.181889	CsC_comb
0.00311111	DP_heat		0.313556	DP_light		0.246556	DP_comb
0	LVP_heat		0	LVP_light		0.099	LVP_comb
0.000666667	Gr3_heat		0.000555556	Gr3_light		0.00111111	Gr3_comb
0.226556	CsC_heat		0	CsC_light		0	CsC_comb
0	DP_heat		0.341444	DP_light		0.332444	DP_comb
0.165444	LVP_heat		0.0636667	LVP_light		0.0187778	LVP_comb
0	Gr3_heat		0	Gr3_light		0.688778	Gr3_comb
0	CsC_heat		0.0101111	CsC_light		0.125	CsC_comb
0.0245556	DP_heat		0.356	DP_light		0.285	DP_comb
0.0533333	LVP_heat		0.0114444	LVP_light		0.0656667	LVP_comb
0.101667	Gr3_heat		0	Gr3_light		0.150222	Gr3_comb
0	CsC_heat		0.001	CsC_light		0.288111	CsC_comb
0.0901111	DP_heat		0.343444	DP_light		0.529333	DP_comb
0	LVP_heat		0.00722222	LVP_light		0.124333	LVP_comb
0.0231111	Gr3_heat		0.019	Gr3_light		0.00922222	Gr3_comb
0.203444	CsC_heat		0	CsC_light		0.0837778	CsC_comb
0.034	DP_heat		0.337222	DP_light		0.310889	DP_comb
0.0123333	LVP_heat		0.00566667	LVP_light		0.297444	LVP_comb
0	Gr3_heat		0	Gr3_light		0.00144444	Gr3_comb
0.0236667	DP_heat		0.00122222	CsC_light		0.0347778	CsC_comb
0.0226667	LVP_heat		0.0462222	DP_light		0.0486667	DP_comb
0	Gr3_heat		0.00277778	LVP_light		0.312111	LVP_comb
0.251667	DP_heat		0.415222	DP_light		0.230778	Gr3_comb
						0.0121111	CsC_comb
						0.000888889	DP_comb

## Sheet: Figure 2G
Figure 2G
behavior_prop	stimulus		behavior_prop	stimulus		behavior_prop	stimulus
0	LVP_heat		0	LVP_light		0.332778	LVP_comb
0.012	Gr3_heat		0.00211111	Gr3_light		0	Gr3_comb
0.0573333	CsC_heat		0.09	CsC_light		0.00111111	CsC_comb
0.0684444	DP_heat		0.0251111	DP_light		0.185444	DP_comb
0.00888889	LVP_heat		0	LVP_light		0.00088889	LVP_comb
0	Gr3_heat		0.197222	Gr3_light		0.026	Gr3_comb
0.0435556	CsC_heat		0	CsC_light		0	CsC_comb
0	DP_heat		0.0721111	DP_light		0.0903333	DP_comb
0.0288889	LVP_heat		0.0132222	LVP_light		0	LVP_comb
0	Gr3_heat		0	Gr3_light		0	Gr3_comb
0.0892222	CsC_heat		0.00422222	CsC_light		0.00344444	CsC_comb
0.0324444	DP_heat		0.0754444	DP_light		0.001	DP_comb
0.0715556	LVP_heat		0	LVP_light		0.113667	LVP_comb
0.0921111	Gr3_heat		0.00177778	Gr3_light		0.0416667	Gr3_comb
0.00644444	CsC_heat		0	CsC_light		0.105222	CsC_comb
0	DP_heat		0.0186667	DP_light		0.0665556	DP_comb
0.0588889	LVP_heat		0	LVP_light		0	LVP_comb
0.0251111	Gr3_heat		0.241444	Gr3_light		0.113889	Gr3_comb
0.0553333	CsC_heat		0.00633333	CsC_light		0	CsC_comb
0.083	DP_heat		0.053	DP_light		0.162222	DP_comb
0.0374444	LVP_heat		0.00077778	LVP_light		0	LVP_comb
0	Gr3_heat		0.109222	Gr3_light		0.0331111	Gr3_comb
0	CsC_heat		0	CsC_light		0.0256667	CsC_comb
0.00911111	DP_heat		0.163444	DP_light		0.0912222	DP_comb
0	LVP_heat		0	LVP_light		0.014	LVP_comb
0.00311111	Gr3_heat		0.0881111	Gr3_light		0.173	Gr3_comb
0.0744444	CsC_heat		0	CsC_light		0.0331111	CsC_comb
0.026	DP_heat		0.337444	DP_light		0.001	DP_comb
0	LVP_heat		0.00066667	LVP_light		0.0867778	LVP_comb
0.0554444	Gr3_heat		0.029	Gr3_light		0.00877778	Gr3_comb
0	CsC_heat		0	CsC_light		0.0511111	CsC_comb
0.0551111	DP_heat		0	DP_light		0.148778	DP_comb
0.103889	LVP_heat		0.00133333	LVP_light		0	LVP_comb
0.00211111	Gr3_heat		0.0195556	Gr3_light		0.0984444	Gr3_comb
0.0895556	CsC_heat		0	CsC_light		0.119333	CsC_comb
0	DP_heat		0.174556	DP_light		0.186556	DP_comb
0.0145556	LVP_heat		0.100222	LVP_light		0.03	LVP_comb
0	Gr3_heat		0.0695556	Gr3_light		0.0502222	Gr3_comb
0	CsC_heat		0.001	CsC_light		0.0168889	CsC_comb
0.0964444	DP_heat		0.118333	DP_light		0.0762222	DP_comb
0.0244444	LVP_heat		0.00533333	LVP_light		0.025	LVP_comb
0.0676667	Gr3_heat		0.0368889	Gr3_light		0.105111	Gr3_comb
0.0743333	CsC_heat		0	CsC_light		0.137111	CsC_comb
0	DP_heat		0.0246667	DP_light		0.165222	DP_comb
0.0197778	LVP_heat		0.00155556	LVP_light		0.0105556	LVP_comb
0.0178889	Gr3_heat		0.00733333	Gr3_light		0.0923333	Gr3_comb
0	CsC_heat		0.00311111	CsC_light		0.002	CsC_comb
0.0765556	DP_heat		0.00988889	DP_light		0.00222222	DP_comb
0	LVP_heat		0.00188889	LVP_light		0	LVP_comb
0.00311111	Gr3_heat		0.0925556	Gr3_light		0.00666667	Gr3_comb
0.0377778	CsC_heat		0.163444	CsC_light		0.0203333	CsC_comb
0.102556	DP_heat		0.00611111	DP_light		0.127556	DP_comb
0	LVP_heat		0.0176667	LVP_light		0.016	LVP_comb
0.126778	Gr3_heat		0.0223333	Gr3_light		0.00111111	Gr3_comb
0.0143333	CsC_heat		0.00177778	CsC_light		0.0213333	CsC_comb
0.0135556	DP_heat		0.102778	DP_light		0.123444	DP_comb
0.000666667	LVP_heat		0	LVP_light		0	LVP_comb
0.07	Gr3_heat		0.00577778	Gr3_light		0.0167778	Gr3_comb
0	CsC_heat		0	CsC_light		0	CsC_comb
0.0128889	DP_heat		0.0157778	DP_light		0	DP_comb
0.0158889	LVP_heat		0	LVP_light		0.0204444	LVP_comb
0.00788889	Gr3_heat		0.00633333	Gr3_light		0.001	Gr3_comb
0	CsC_heat		0.00066667	CsC_light		0.107444	CsC_comb
0.0115556	DP_heat		0.188667	DP_light		0.00822222	DP_comb
0	LVP_heat		0	LVP_light		0.0282222	LVP_comb
0	Gr3_heat		0.0896667	Gr3_light		0.00366667	Gr3_comb
0	CsC_heat		0	CsC_light		0.0227778	CsC_comb
0.219111	DP_heat		0.0266667	DP_light		0.128222	DP_comb
0.0178889	LVP_heat		0	LVP_light		0.0547778	LVP_comb
0	Gr3_heat		0	Gr3_light		0	Gr3_comb
0.0414444	CsC_heat		0.0268889	CsC_light		0.129111	CsC_comb
0.0862222	DP_heat		0.0294444	DP_light		0.157778	DP_comb
0.174333	LVP_heat		0.0187778	LVP_light		0.0948889	LVP_comb
0.057	Gr3_heat		0	Gr3_light		0.00266667	Gr3_comb
0.0346667	CsC_heat		0	CsC_light		0.140778	CsC_comb
0.00333333	DP_heat		0.0326667	DP_light		0.185667	DP_comb
0.1	LVP_heat		0.00266667	LVP_light		0.0776667	LVP_comb
0.129667	Gr3_heat		0.0998889	Gr3_light		0.00544444	Gr3_comb
0.174444	CsC_heat		0	CsC_light		0.100444	CsC_comb
0.182778	DP_heat		0.0773333	DP_light		0.00077778	DP_comb
0.004	LVP_heat		0.0214444	LVP_light		0.102667	LVP_comb
0.0398889	Gr3_heat		0	Gr3_light		0.0984444	Gr3_comb
0.000888889	CsC_heat		0	CsC_light		0.05	CsC_comb
0.0495556	DP_heat		0.0355556	DP_light		0.0328889	DP_comb
0	LVP_heat		0	LVP_light		0	LVP_comb
0	Gr3_heat		0	Gr3_light		0.086	Gr3_comb
0.119111	CsC_heat		0	CsC_light		0.178667	CsC_comb
0.175333	DP_heat		0	DP_light		0.131556	DP_comb
0.00288889	LVP_heat		0	LVP_light		0.0117778	LVP_comb
0	Gr3_heat		0	Gr3_light		0.0896667	Gr3_comb
0.135111	CsC_heat		0	CsC_light		0	CsC_comb
0.00288889	DP_heat		0.0228889	DP_light		0.310333	DP_comb
0.0256667	LVP_heat		0	LVP_light		0.0227778	LVP_comb
0	Gr3_heat		0.0248889	Gr3_light		0	Gr3_comb
0.0628889	CsC_heat		0	CsC_light		0.075	CsC_comb
0.183	DP_heat		0.0227778	DP_light		0.177778	DP_comb
0	LVP_heat		0.00266667	LVP_light		0.195222	LVP_comb
0.00144444	Gr3_heat		0.00133333	Gr3_light		0.0814444	Gr3_comb
0.0527778	CsC_heat		0	CsC_light		0.148444	CsC_comb
0.106667	DP_heat		0.0591111	DP_light		0	DP_comb
0	LVP_heat		0	LVP_light		0	LVP_comb
0.049	Gr3_heat		0	Gr3_light		0	Gr3_comb
0.0441111	CsC_heat		0.004	CsC_light		0.00811111	CsC_comb
0.0136667	DP_heat		0	DP_light		0.198667	DP_comb
0	LVP_heat		0.018	LVP_light		0.007	LVP_comb
0.0342222	Gr3_heat		0.00066667	Gr3_light		0	Gr3_comb
0.0322222	CsC_heat		0.0152222	CsC_light		0.0303333	CsC_comb
0.0267778	DP_heat		0.0928889	DP_light		0.160444	DP_comb
0.108111	LVP_heat		0.0137778	LVP_light		0.0446667	LVP_comb
0.0105556	Gr3_heat		0	Gr3_light		0.0161111	Gr3_comb
0.000666667	CsC_heat		0	CsC_light		0.0526667	CsC_comb
0.0113333	DP_heat		0.115778	DP_light		0.0101111	DP_comb
0	LVP_heat		0.00355556	LVP_light		0.0333333	LVP_comb
0	Gr3_heat		0.00088889	Gr3_light		0	Gr3_comb
0	CsC_heat		0.104444	CsC_light		0.0396667	CsC_comb
0.124556	DP_heat		0.00077778	DP_light		0.194889	DP_comb
0.0157778	LVP_heat		0	LVP_light		0.00077778	LVP_comb
0.0996667	Gr3_heat		0.00433333	Gr3_light		0	Gr3_comb
0.128111	CsC_heat		0.0208889	CsC_light		0.00211111	CsC_comb
0.110778	DP_heat		0.00844444	DP_light		0	DP_comb
0.0285556	LVP_heat		0	LVP_light		0.153111	LVP_comb
0	Gr3_heat		0.00177778	Gr3_light		0	Gr3_comb
0.281	CsC_heat		0	CsC_light		0.153	CsC_comb
0.0684444	DP_heat		0.0484444	DP_light		0.198667	DP_comb
0.126667	LVP_heat		0.00155556	LVP_light		0.0298889	LVP_comb
0.0915556	Gr3_heat		0	Gr3_light		0.208556	Gr3_comb
0	CsC_heat		0	CsC_light		0.108	CsC_comb
0.0316667	DP_heat		0.00188889	DP_light		0.118667	DP_comb
0.0527778	LVP_heat		0	LVP_light		0.078	LVP_comb
0.001	Gr3_heat		0.00133333	Gr3_light		0.0253333	Gr3_comb
0.107556	CsC_heat		0	CsC_light		0.145556	CsC_comb
0.00777778	DP_heat		0.0268889	DP_light		0.204667	DP_comb
0.0276667	LVP_heat		0.00088889	LVP_light		0.0476667	LVP_comb
0.0107778	Gr3_heat		0.0114444	Gr3_light		0	Gr3_comb
0.0672222	CsC_heat		0	CsC_light		0.033	CsC_comb
0.112889	DP_heat		0.104111	DP_light		0.0808889	DP_comb
0.00188889	LVP_heat		0.005	LVP_light		0	LVP_comb
0.0416667	Gr3_heat		0.0186667	Gr3_light		0.260667	Gr3_comb
0	CsC_heat		0.00955556	CsC_light		0.188556	CsC_comb
0.0326667	DP_heat		0.0503333	DP_light		0.161556	DP_comb
0.176111	LVP_heat		0.0501111	LVP_light		0	LVP_comb
0.190111	Gr3_heat		0	Gr3_light		0.0296667	Gr3_comb
0	CsC_heat		0	CsC_light		0.0302222	CsC_comb
0	DP_heat		0.0776667	DP_light		0	DP_comb
0.118444	LVP_heat		0	LVP_light		0.304333	LVP_comb
0	Gr3_heat		0	Gr3_light		0.00466667	Gr3_comb
0.118333	CsC_heat		0.006	CsC_light		0.00633333	CsC_comb
0	DP_heat		0.0136667	DP_light		0.0991111	DP_comb
0.000888889	LVP_heat		0	LVP_light		0.0344444	LVP_comb
0.000888889	Gr3_heat		0.00277778	Gr3_light		0.0143333	Gr3_comb
0.00333333	CsC_heat		0.00155556	CsC_light		0.163444	CsC_comb
0	DP_heat		0.0924444	DP_light		0.00311111	DP_comb
0	LVP_heat		0	LVP_light		0	LVP_comb
0	Gr3_heat		0	Gr3_light		0	Gr3_comb
0	CsC_heat		0.004	CsC_light		0.279111	CsC_comb
0	DP_heat		0.247333	DP_light		0.110444	DP_comb
0.0526667	LVP_heat		0.0467778	LVP_light		0.00322222	LVP_comb
0	Gr3_heat		0.0264444	Gr3_light		0	Gr3_comb
0.0611111	CsC_heat		0.00144444	CsC_light		0.0623333	CsC_comb
0	DP_heat		0.0116667	DP_light		0.041	DP_comb
0.0435556	LVP_heat		0	LVP_light		0.0797778	LVP_comb
0.00922222	Gr3_heat		0	Gr3_light		0.0585556	Gr3_comb
0.0481111	CsC_heat		0	CsC_light		0.00077778	CsC_comb
0.000888889	DP_heat		0	DP_light		0.074	DP_comb
0.0113333	LVP_heat		0.0662222	LVP_light		0.0568889	LVP_comb
0	Gr3_heat		0	Gr3_light		0.00366667	Gr3_comb
0.00377778	CsC_heat		0	CsC_light		0.00066667	CsC_comb
0	DP_heat		0.260222	DP_light		0.0432222	DP_comb
0.00111111	LVP_heat		0.00155556	LVP_light		0.0234444	LVP_comb
0.0125556	Gr3_heat		0	Gr3_light		0	Gr3_comb
0	CsC_heat		0.0667778	CsC_light		0.0122222	CsC_comb
0.00133333	DP_heat		0.224333	DP_light		0.251444	DP_comb
0.0365556	LVP_heat		0	LVP_light		0.198556	LVP_comb
0.0258889	Gr3_heat		0	Gr3_light		0.187778	Gr3_comb
0.00477778	CsC_heat		0	CsC_light		0.0386667	CsC_comb
0.0183333	DP_heat		0.0781111	DP_light		0.181444	DP_comb
0.270667	LVP_heat		0.0162222	LVP_light		0.0714444	LVP_comb
0.00511111	Gr3_heat		0.0196667	Gr3_light		0.0311111	Gr3_comb
0.0867778	CsC_heat		0	CsC_light		0.00188889	CsC_comb
0	DP_heat		0.0841111	DP_light		0.304333	DP_comb
0.179556	LVP_heat		0	LVP_light		0.0285556	LVP_comb
0.003	Gr3_heat		0	Gr3_light		0.0802222	Gr3_comb
0.078	CsC_heat		0	CsC_light		0.0401111	CsC_comb
0	DP_heat		0.460222	DP_light		0	DP_comb
0.0256667	LVP_heat		0.00911111	LVP_light		0.0408889	LVP_comb
0.0188889	Gr3_heat		0	Gr3_light		0.001	Gr3_comb
0.0332222	CsC_heat		0	CsC_light		0.0446667	CsC_comb
0	DP_heat		0.341222	DP_light		0.169556	DP_comb
0.037	LVP_heat		0	LVP_light		0.00655556	LVP_comb
0.0194444	Gr3_heat		0.00188889	Gr3_light		0	Gr3_comb
0.0292222	CsC_heat		0	CsC_light		0.223778	CsC_comb
0	DP_heat		0.274111	DP_light		0.116556	DP_comb
0.0416667	LVP_heat		0	LVP_light		0.0166667	LVP_comb
0	Gr3_heat		0	Gr3_light		0	Gr3_comb
0	CsC_heat		0.00077778	CsC_light		0.0408889	CsC_comb
0.0623333	DP_heat		0	DP_light		0.125667	DP_comb
0.0116667	LVP_heat		0.00111111	LVP_light		0.00222222	LVP_comb
0.0256667	Gr3_heat		0	Gr3_light		0.0172222	Gr3_comb
0	CsC_heat		0.00088889	CsC_light		0.00288889	CsC_comb
0.118556	DP_heat		0.313667	DP_light		0.133333	DP_comb
0.00911111	LVP_heat		0	LVP_light		0.0132222	LVP_comb
0.0573333	Gr3_heat		0	Gr3_light		0	Gr3_comb
0.11	CsC_heat		0	CsC_light		0.0932222	CsC_comb
0.003	DP_heat		0.0315556	DP_light		0	DP_comb
0.0466667	LVP_heat		0.0164444	LVP_light		0.0128889	LVP_comb
0.0423333	Gr3_heat		0	Gr3_light		0.0315556	Gr3_comb
0.0653333	CsC_heat		0	CsC_light		0.0167778	CsC_comb
0.00555556	DP_heat		0.013	DP_light		0	DP_comb
0.00177778	LVP_heat		0.00188889	LVP_light		0.145778	LVP_comb
0.0643333	Gr3_heat		0	Gr3_light		0.0562222	Gr3_comb
0.0371111	CsC_heat		0	CsC_light		0	CsC_comb
0.00355556	DP_heat		0.111222	DP_light		0.119111	DP_comb
0.124556	LVP_heat		0.027	LVP_light		0	LVP_comb
0.00677778	Gr3_heat		0	Gr3_light		0.00955556	Gr3_comb
0	CsC_heat		0	CsC_light		0.0493333	CsC_comb
0.0383333	DP_heat		0.0673333	DP_light		0.104556	DP_comb
0.0376667	LVP_heat		0	LVP_light		0	LVP_comb
0.00133333	Gr3_heat		0	Gr3_light		0.015	Gr3_comb
0	CsC_heat		0	CsC_light		0.032	CsC_comb
0.0148889	DP_heat		0.0827778	DP_light		0.151889	DP_comb
0.0217778	LVP_heat		0.00911111	LVP_light		0.0553333	LVP_comb
0	Gr3_heat		0	Gr3_light		0.00066667	Gr3_comb
0.0533333	CsC_heat		0	CsC_light		0.0121111	CsC_comb
0.0102222	DP_heat		0.0304444	DP_light		0.209667	DP_comb
0.00277778	LVP_heat		0	LVP_light		0	LVP_comb
0.0753333	Gr3_heat		0.00566667	Gr3_light		0.0564444	Gr3_comb
0.00511111	CsC_heat		0	CsC_light		0.0467778	CsC_comb
0.0726667	DP_heat		0.182556	DP_light		0.0535556	DP_comb
0.0665556	LVP_heat		0.0513333	LVP_light		0.0595556	LVP_comb
0.128222	Gr3_heat		0	Gr3_light		0.0224444	Gr3_comb
0.00133333	CsC_heat		0	CsC_light		0.0218889	CsC_comb
0	DP_heat		0.0261111	DP_light		0.15	DP_comb
0	LVP_heat		0	LVP_light		0.0705556	LVP_comb
0.00155556	Gr3_heat		0	Gr3_light		0.395889	Gr3_comb
0	CsC_heat		0.00066667	CsC_light		0.00366667	CsC_comb
0.0222222	DP_heat		0.265222	DP_light		0.0376667	DP_comb
0.190889	LVP_heat		0.00266667	LVP_light		0.0466667	LVP_comb
0.00944444	Gr3_heat		0.0174444	Gr3_light		0	Gr3_comb
0.0194444	CsC_heat		0	CsC_light		0.00866667	CsC_comb
0	DP_heat		0.0784444	DP_light		0.0811111	DP_comb
0	LVP_heat		0	LVP_light		0.270667	LVP_comb
0.202778	Gr3_heat		0	Gr3_light		0.0833333	Gr3_comb
0.0584444	CsC_heat		0	CsC_light		0.117111	CsC_comb
0.105444	DP_heat		0.097	DP_light		0.163222	DP_comb
0.0417778	LVP_heat		0	LVP_light		0.022	LVP_comb
0	Gr3_heat		0	Gr3_light		0.0898889	Gr3_comb
0	CsC_heat		0.00722222	CsC_light		0.0365556	CsC_comb
0.084	DP_heat		0.162222	DP_light		0.00555556	DP_comb
0.000666667	LVP_heat		0.00522222	LVP_light		0.0206667	LVP_comb
0	Gr3_heat		0.003	Gr3_light		0.0552222	Gr3_comb
0	CsC_heat		0	CsC_light		0.0981111	CsC_comb
0.0257778	DP_heat		0.275111	DP_light		0.122444	DP_comb
0	LVP_heat		0.00622222	LVP_light		0.169778	LVP_comb
0.0721111	Gr3_heat		0.00088889	Gr3_light		0	Gr3_comb
0.0525556	CsC_heat		0	CsC_light		0.006	CsC_comb
0.0747778	DP_heat		0.0945556	DP_light		0.141667	DP_comb
0.195889	LVP_heat		0	LVP_light		0.0333333	LVP_comb
0	Gr3_heat		0	Gr3_light		0	Gr3_comb
0.087	CsC_heat		0	CsC_light		0	CsC_comb
0.00555556	DP_heat		0.0142222	DP_light		0.0968889	DP_comb
0.111556	LVP_heat		0.00366667	LVP_light		0.0161111	LVP_comb
0.0225556	Gr3_heat		0	Gr3_light		0.193222	Gr3_comb
0	CsC_heat		0.00266667	CsC_light		0.013	CsC_comb
0	DP_heat		0.199	DP_light		0.113556	DP_comb
0.0612222	LVP_heat		0.00333333	LVP_light		0.0845556	LVP_comb
0.148	Gr3_heat		0	Gr3_light		0.0384444	Gr3_comb
0	CsC_heat		0.00066667	CsC_light		0.117556	CsC_comb
0.125	DP_heat		0.108889	DP_light		0.241889	DP_comb
0	LVP_heat		0.0211111	LVP_light		0.0134444	LVP_comb
0.005	Gr3_heat		0.00466667	Gr3_light		0.0355556	Gr3_comb
0.076	CsC_heat		0	CsC_light		0.016	CsC_comb
0.0282222	DP_heat		0.133889	DP_light		0.0954444	DP_comb
0.176667	LVP_heat		0	LVP_light		0.0224444	LVP_comb
0.00677778	Gr3_heat		0	Gr3_light		0	Gr3_comb
0.0207778	DP_heat		0	CsC_light		0.0368889	CsC_comb
0.291333	LVP_heat		0.015	DP_light		0.045	DP_comb
0.00277778	Gr3_heat		0.0378889	LVP_light		0.124333	LVP_comb
0.00766667	DP_heat		0.179778	DP_light		0.0572222	Gr3_comb
						0	CsC_comb
						0.00611111	DP_comb

## Sheet: Figure 2H
Figure 2H
Heat
time	-120	-114.975	-109.951	-104.926	-99.9015	-94.8768	-89.8522	-84.8276	-79.803	-74.7783	-69.7537	-64.7291	-59.7044	-54.6798	-49.6552	-44.6305	-39.6059	-34.5813	-29.5567	-24.532	-19.5074	-14.4828	-9.45813	-4.4335	0.591133	5.61576	10.6404	15.665	20.6897	25.7143	30.7389	35.7635	40.7882	45.8128	50.8374	55.8621	60.8867	65.9113	70.936	75.9606	80.9852	86.0099	91.0345	96.0591	101.084	106.108	111.133	116.158	121.182
groom3	0.305238	0.315714	0.278762	0.297714	0.304095	0.275714	0.278571	0.265619	0.260571	0.279048	0.257429	0.266762	0.27181	0.263238	0.254	0.221429	0.210095	0.240762	0.244857	0.254	0.216762	0.229619	0.204	0.178571	0.0910476	0.0799048	0.117714	0.0929524	0.0755238	0.0817143	0.0828571	0.103048	0.0781905	0.100952	0.0885714	0.0714286	0.0906667	0.0915238	0.0801905	0.0578095	0.0811429	0.0478095	0.0709524	0.0811429	0.0847619	0.0951429	0.102	0.0648571	0.0913333
walk3	0.0269524	0.0227619	0.0350476	0.0218095	0.0162857	0.0372381	0.0206667	0.0126667	0.0191429	0.0287619	0.03	0.0226667	0.0226667	0.00742857	0.0118095	0.000666667	0.0328571	0.0262857	0.0305714	0.0230476	0.0185714	0.0392381	0.018381	0.030381	0.0893333	0.106381	0.158571	0.0950476	0.0724762	0.0494286	0.0693333	0.0686667	0.0480952	0.0465714	0.0641905	0.0561905	0.0582857	0.0421905	0.0458095	0.0579048	0.0449524	0.0174286	0.0521905	0.067619	0.0586667	0.0541905	0.0351429	0.0313333	0.0571429
probe5	0.01	0	0.00361905	0.00314286	0	0.0109524	0.00247619	0.008	0.00514286	0.00552381	0.00752381	0.0110476	0.00457143	0.00790476	0.00190476	0.00733333	0.0213333	0.0125714	0.0149524	0.026	0.0133333	0.0155238	0.0145714	0.00933333	0.106381	0.308667	0.290286	0.218381	0.114381	0.0977143	0.0606667	0.066381	0.0374286	0.0337143	0.031619	0.0328571	0.0359048	0.0474286	0.0373333	0.0244762	0.023619	0.0297143	0.0379048	0.0347619	0.0525714	0.0341905	0.0342857	0.0255238	0.0370476
fly2	0	0	0	0	0.00209524	0	0.00161905	0	0	0	0	0	0	0	0	0.00352381	0	0.00285714	0	0.00295238	0	0	0.000380952	0	0.0122857	0.000666667	0.00485714	0.000285714	9.52381e-05	0.00228571	0.000571429	0	0	0	0.000571429	0.00571429	0	0.000571429	0.0027619	0.000666667	0.00342857	0.00228571	0	0	0	0	0	0.00438095	0
Light
time	-120	-114.975	-109.951	-104.926	-99.9015	-94.8768	-89.8522	-84.8276	-79.803	-74.7783	-69.7537	-64.7291	-59.7044	-54.6798	-49.6552	-44.6305	-39.6059	-34.5813	-29.5567	-24.532	-19.5074	-14.4828	-9.45813	-4.4335	0.591133	5.61576	10.6404	15.665	20.6897	25.7143	30.7389	35.7635	40.7882	45.8128	50.8374	55.8621	60.8867	65.9113	70.936	75.9606	80.9852	86.0099	91.0345	96.0591	101.084	106.108	111.133	116.158	121.182
groom3	0.203238	0.21981	0.186381	0.178571	0.177238	0.212	0.201905	0.172381	0.154762	0.159143	0.170762	0.165333	0.174667	0.161524	0.163619	0.17219	0.16	0.133048	0.148095	0.131524	0.120762	0.135429	0.147905	0.139524	0.0492381	0.0267619	0.0317143	0.0582857	0.0412381	0.0209524	0.0450476	0.036	0.0284762	0.031619	0.0544762	0.0564762	0.0601905	0.0550476	0.0544762	0.0564762	0.0595238	0.0484762	0.0555238	0.079619	0.0693333	0.0720952	0.0673333	0.0822857	0.0738095
walk3	0.0189524	0.0190476	0.0152381	0.0155238	0.0178095	0.0177143	0.0159048	0.016	0.0142857	0.0150476	0.0149524	0.0130476	0.013619	0.0154286	0.0142857	0.00542857	0.0125714	0.0135238	0.0131429	0.0167619	0.0230476	0.0265714	0.0186667	0.0285714	0.087619	0.368381	0.359714	0.28019	0.225238	0.234476	0.179524	0.184095	0.255143	0.270476	0.276286	0.314667	0.279048	0.30219	0.346762	0.36619	0.296667	0.265238	0.260095	0.291429	0.322952	0.340667	0.282095	0.252286	0.261333
probe5	0.0122857	0.00219048	0.00771429	0.00961905	0.00980952	0.0107619	0.0012381	0.0138095	0.00580952	0.00447619	0.00247619	0.00904762	0.0228571	0.0155238	0.0114286	0.0222857	0.0141905	0.027619	0.0199048	0.00971429	0.0114286	0.0369524	0.0259048	0.0258095	0.0277143	0.111905	0.127333	0.138952	0.0939048	0.118571	0.0726667	0.0831429	0.127048	0.152476	0.110667	0.13819	0.133143	0.142857	0.155619	0.147048	0.11981	0.081619	0.104	0.116952	0.0990476	0.103333	0.0891429	0.0921905	0.0981905
fly2	0	0	0	0	0	0	0	0	0	0	0	0	0	0	0	0	0	0	0	0	0	0	0	0	0.18581	0.0244762	0.0120952	0.0124762	0.00752381	0.012	0.00790476	0.002	0.00714286	0.00466667	0.00752381	0.00590476	0.0145714	0.00542857	0.00419048	0.00171429	0.0219048	0.0092381	0.00771429	0.00714286	0.0114286	0.00333333	0.0149524	0.00409524	0.00619048
Heat + Light
time	-120	-114.975	-109.951	-104.926	-99.9015	-94.8768	-89.8522	-84.8276	-79.803	-74.7783	-69.7537	-64.7291	-59.7044	-54.6798	-49.6552	-44.6305	-39.6059	-34.5813	-29.5567	-24.532	-19.5074	-14.4828	-9.45813	-4.4335	0.591133	5.61576	10.6404	15.665	20.6897	25.7143	30.7389	35.7635	40.7882	45.8128	50.8374	55.8621	60.8867	65.9113	70.936	75.9606	80.9852	86.0099	91.0345	96.0591	101.084	106.108	111.133	116.158	121.182
groom3	0.334667	0.352667	0.310476	0.301429	0.291905	0.298762	0.321048	0.297905	0.284667	0.296286	0.278857	0.247619	0.251429	0.249905	0.239619	0.212857	0.211429	0.201429	0.234095	0.227238	0.251619	0.222952	0.212571	0.228095	0.0686667	0.096	0.095619	0.0702857	0.068381	0.058	0.056	0.0406667	0.0667619	0.0802857	0.0680952	0.0659048	0.0765714	0.0615238	0.066381	0.0599048	0.0594286	0.0879048	0.0846667	0.0874286	0.0742857	0.096381	0.0822857	0.0957143	0.102476
walk3	0.0113333	0.012	0.0135238	0.00419048	0.00247619	0.0107619	0.00133333	0.00609524	0.00428571	0.0107619	0.0087619	0.018381	0.0154286	0.00495238	0.00228571	0.002	0.00247619	0.0146667	0.0287619	0.00704762	0.006	0.0118095	0.000952381	0.00295238	0.0547619	0.234667	0.349048	0.379429	0.350286	0.386857	0.379048	0.32819	0.330571	0.307429	0.298857	0.325619	0.263238	0.276381	0.302667	0.267333	0.33381	0.298762	0.230667	0.255905	0.291905	0.297619	0.290476	0.251429	0.220286
probe5	0.0241905	0.0129524	0.00628571	0.00542857	0.0106667	0.00742857	0.004	0.00285714	0.00190476	0.00685714	0	0.0144762	0.0253333	0.0234286	0.0160952	0.00733333	0.004	0.00914286	0.0119048	0.00504762	0.00419048	0.00304762	0.00771429	0.0128571	0.0540952	0.360286	0.523333	0.509333	0.432667	0.37581	0.30619	0.235143	0.196	0.143143	0.120952	0.106952	0.103619	0.0970476	0.0953333	0.107238	0.114667	0.111905	0.0809524	0.0869524	0.0997143	0.0985714	0.116667	0.0655238	0.0520952
fly2	0	0	0	0	0	0	0	0	0.000190476	0	0.000666667	0	0	0	0	0	0	0	0	0	0	0	0	0	0.0582857	0.0152381	0.00466667	0.0072381	0.00485714	0.00742857	0.00638095	0.0101905	0.00495238	0.00257143	0.00847619	0.00180952	0.00285714	0.00361905	0.00047619	0.0067619	0.00228571	0.0032381	0.00638095	0.00447619	0.00885714	0.00438095	0.00352381	0.00666667	0.00333333
[truncated: 155 more columns]

## Sheet: Figure 2I
Figure 2I
Heat
time	-60	-58.9944	-57.9888	-56.9832	-55.9777	-54.9721	-53.9665	-52.9609	-51.9553	-50.9497	-49.9441	-48.9385	-47.933	-46.9274	-45.9218	-44.9162	-43.9106	-42.905	-41.8994	-40.8939	-39.8883	-38.8827	-37.8771	-36.8715	-35.8659	-34.8603	-33.8547	-32.8492	-31.8436	-30.838	-29.8324	-28.8268	-27.8212	-26.8156	-25.8101	-24.8045	-23.7989	-22.7933	-21.7877	-20.7821	-19.7765	-18.7709	-17.7654	-16.7598	-15.7542	-14.7486	-13.743	-12.7374	-11.7318
groom3	0.0277778	0.0226984	0.0212698	0.0264286	0.0307143	0.0273016	0.0245238	0.0262698	0.0257937	0.0219048	0.0211111	0.0216667	0.0205556	0.0237302	0.0269841	0.0221429	0.0249206	0.0226984	0.0293651	0.0205556	0.0199206	0.0207937	0.0248413	0.0277778	0.0240476	0.0261111	0.0212698	0.0229365	0.0203175	0.0263492	0.0257937	0.0257937	0.0225397	0.027619	0.0288095	0.03	0.0228571	0.0236508	0.0233333	0.020873	0.0219841	0.0234921	0.0275397	0.0277778	0.0253968	0.022381	0.0233333	0.0294444	0.0253175
walk3	0.0284127	0.0219048	0.0236508	0.0219048	0.0233333	0.0179365	0.0203175	0.0193651	0.0239683	0.0261905	0.029127	0.0257143	0.0296825	0.031746	0.0334921	0.0399206	0.0407143	0.0352381	0.0361111	0.0339683	0.0228571	0.030873	0.0315873	0.0401587	0.0269841	0.0303175	0.0300794	0.0307937	0.0248413	0.0316667	0.0278571	0.0288095	0.0285714	0.0216667	0.0173016	0.0199206	0.0180952	0.0234921	0.0265873	0.0366667	0.0354762	0.0253175	0.0307143	0.0320635	0.0325397	0.0322222	0.0342857	0.0366667	0.0337302
probe5	0.00674603	0.00968254	0.00753968	0.00404762	0.00309524	0.00142857	0.00619048	0.00579365	0.0113492	0.00642857	0.00563492	0.00515873	0.00674603	0.00801587	0.00912698	0.005	0.00388889	0.00722222	0.00880952	0.0101587	0.00785714	0.00333333	0.00761905	0.00238095	0.00650794	0.00198413	0.00468254	0.00928571	0.00944444	0.0104762	0.0138889	0.00825397	0.00936508	0.00833333	0.00896825	0.00722222	0.00936508	0.0166667	0.0123016	0.0084127	0.00452381	0.00634921	0.00730159	0.00912698	0.00698413	0.00468254	0.00539683	0.00349206	0.00468254
fly2	0	0	0	0	0	0.00031746	7.93651e-05	0.000238095	0.00650794	0.00174603	0.00103175	0	0	0	0	0.00222222	7.93651e-05	0	0.000793651	0.00206349	0.00214286	0.00174603	0	0.00111111	0.00150794	0.00142857	0	0.000634921	0.00015873	0	0.00206349	0.000634921	0	0	0	0	0	0.00134921	0.000873016	0.00222222	0.00380952	0.00047619	0	0	0.000396825	0.000952381	0	0.00015873	7.93651e-05
Light
time	-60	-58.9944	-57.9888	-56.9832	-55.9777	-54.9721	-53.9665	-52.9609	-51.9553	-50.9497	-49.9441	-48.9385	-47.933	-46.9274	-45.9218	-44.9162	-43.9106	-42.905	-41.8994	-40.8939	-39.8883	-38.8827	-37.8771	-36.8715	-35.8659	-34.8603	-33.8547	-32.8492	-31.8436	-30.838	-29.8324	-28.8268	-27.8212	-26.8156	-25.8101	-24.8045	-23.7989	-22.7933	-21.7877	-20.7821	-19.7765	-18.7709	-17.7654	-16.7598	-15.7542	-14.7486	-13.743	-12.7374	-11.7318
groom3	0.0206349	0.0196032	0.0162698	0.0195238	0.0201587	0.0196825	0.0175397	0.0178571	0.0236508	0.0215079	0.0201587	0.0185714	0.0164286	0.0180952	0.0353968	0.0319841	0.0226191	0.0227778	0.0201587	0.0161905	0.0230159	0.0265079	0.0257143	0.0246032	0.0288095	0.0226984	0.0222222	0.0250794	0.0215079	0.0246032	0.0278571	0.0226984	0.0274603	0.0292063	0.0238095	0.0231746	0.0239682	0.0203175	0.0221429	0.0246825	0.0242064	0.0216667	0.0265873	0.0246032	0.0201587	0.0212698	0.0234921	0.0270635	0.0212698
walk3	0.0324603	0.0387302	0.0405556	0.0428571	0.049127	0.0478571	0.0438095	0.0415873	0.0430159	0.0334127	0.0280952	0.031746	0.0327778	0.04	0.0424603	0.0430952	0.0423016	0.0371429	0.0378571	0.0403175	0.0379365	0.0329365	0.0325397	0.0275397	0.024127	0.0246032	0.0277778	0.0231746	0.0283333	0.04	0.0277778	0.0304762	0.0273016	0.0329365	0.0226984	0.0290476	0.027381	0.0263492	0.0210317	0.0265079	0.0347619	0.0313492	0.0319048	0.0312698	0.0303968	0.0306349	0.0269841	0.0319048	0.0363492
probe5	0.00746032	0.00880952	0.00555556	0.00849206	0.00936508	0.00722222	0.00373016	0.00198413	0.00222222	0.00261905	0.00087302	0.0047619	0.00357143	0.00619048	0.00769841	0.00738095	0.00642857	0.00277778	0.00246032	0.00515873	0.00309524	0.00809524	0.00690476	0.00722222	0.0031746	0.00174603	0.00269841	0.00261905	0.00055556	0.00444444	0.00301587	0.0018254	0.00261905	0.00984127	0.0111905	0.00777778	0.00539683	0.00888889	0.0109524	0.00547619	0.00190476	0.00444444	0.00698413	0.00603175	0.0031746	0.00888889	0.00412698	0.00063492	0.00333333
fly2	0.00063492	0	0	0	0.00079365	0.00039683	0	0.00095238	0.00190476	7.94e-05	7.94e-05	0	0.00087302	0.00047619	0.00087302	0	0	0	0.00079365	0	0.00055556	0.00380952	0.00238095	0.00047619	0.00119048	0.00087302	0.00031746	0.00039683	7.94e-05	0.00079365	0.00166667	0.00214286	0	0.00111111	0.00174603	0.0031746	0.00603175	0.0002381	0.00238095	0.00071429	0.00015873	0.00055556	0	0	0.00071429	0.00246032	0.00214286	0	0
Heat + Light
time	-60	-58.9944	-57.9888	-56.9832	-55.9777	-54.9721	-53.9665	-52.9609	-51.9553	-50.9497	-49.9441	-48.9385	-47.933	-46.9274	-45.9218	-44.9162	-43.9106	-42.905	-41.8994	-40.8939	-39.8883	-38.8827	-37.8771	-36.8715	-35.8659	-34.8603	-33.8547	-32.8492	-31.8436	-30.838	-29.8324	-28.8268	-27.8212	-26.8156	-25.8101	-24.8045	-23.7989	-22.7933	-21.7877	-20.7821	-19.7765	-18.7709	-17.7654	-16.7598	-15.7542	-14.7486	-13.743	-12.7374	-11.7318
groom3	0.0214286	0.03	0.0230159	0.0304762	0.0343651	0.0298413	0.0346032	0.027619	0.0253968	0.0280952	0.0289683	0.0215873	0.0268254	0.027381	0.0271429	0.0283333	0.0309524	0.0253968	0.0234921	0.0237302	0.0238095	0.0222222	0.0269841	0.0309524	0.0298413	0.036746	0.0313492	0.031746	0.0360317	0.0398413	0.0363492	0.0315873	0.032381	0.0345238	0.0316667	0.03	0.0313492	0.0351587	0.026746	0.0280952	0.0324603	0.0272222	0.0285714	0.0345238	0.0307143	0.0296032	0.034127	0.0349206	0.0306349
walk3	0.0496032	0.053254	0.0535714	0.0518254	0.0463492	0.0450794	0.0471429	0.0456349	0.0455556	0.0409524	0.0393651	0.0381746	0.0326984	0.0292857	0.030873	0.0311111	0.0345238	0.025873	0.0333333	0.0268254	0.0281746	0.0215079	0.0236508	0.0248413	0.0245238	0.0253968	0.0310317	0.0311111	0.0346032	0.0368254	0.0305556	0.0333333	0.0329365	0.0357143	0.026746	0.0327778	0.0304762	0.0288095	0.0265873	0.0262698	0.0272222	0.0330952	0.0398413	0.0401587	0.042619	0.0318254	0.0292857	0.0297619	0.0325397
probe5	0.00825397	0.0103968	0.00595238	0.00246032	0.00642857	0.0103968	0.00595238	0.00515873	0.00444444	0.00650794	0.0034127	0.00277778	0.00230159	0.00309524	0.00253968	0.00460317	0.0034127	0.00253968	0.00261905	0.00380952	0.00238095	0.00428571	0.00285714	0.00690476	0.00404762	0.00293651	0.00190476	0.0031746	0.00547619	0.00333333	0.00166667	0.00142857	0.00047619	0.00103175	0.00285714	0.00126984	0.00198413	0.00388889	0.00484127	0.00285714	0.00674603	0.00785714	0.00785714	0.0081746	0.00865079	0.00611111	0.00309524	0.00246032	0.00357143
fly2	0	0	0	0	0.000555556	0.00230159	0.000873016	0.000396825	0	0	0	0	0	0	0.00047619	0.00214286	0.0031746	0.00126984	0.0015873	0	0	0	0	0	0	0.000952381	0.00333333	0	0.00134921	0	0.00126984	0.00333333	0.00119048	0.000555556	0	0	0.00238095	0.00166667	0.00253968	0.00253968	0	0	0.00222222	0.00301587	0	0	0	0	0
[truncated: 131 more columns]

## Sheet: Figure 2J
Figure 2J
Heat
time	-120	-114.975	-109.951	-104.926	-99.9015	-94.8768	-89.8522	-84.8276	-79.803	-74.7783	-69.7537	-64.7291	-59.7044	-54.6798	-49.6552	-44.6305	-39.6059	-34.5813	-29.5567	-24.532	-19.5074	-14.4828	-9.45813	-4.4335	0.591133	5.61576	10.6404	15.665	20.6897	25.7143	30.7389	35.7635	40.7882	45.8128	50.8374	55.8621	60.8867	65.9113	70.936	75.9606	80.9852	86.0099	91.0345	96.0591	101.084	106.108	111.133	116.158	121.182
groom3	0.0560387	0.0509501	0.0502416	0.0557166	0.0547826	0.0556522	0.0584219	0.0504026	0.0534299	0.0567472	0.048277	0.0528502	0.0530757	0.0573913	0.0563607	0.0590982	0.0526892	0.0476006	0.0552657	0.0625121	0.0625121	0.056876	0.0475684	0.044219	0.0327858	0.0402254	0.0343961	0.0323349	0.0313365	0.0208696	0.0188084	0.0217069	0.0285024	0.0229952	0.0236393	0.0230596	0.02438	0.0197423	0.0180998	0.0194847	0.0308535	0.0232206	0.0259259	0.0250564	0.0280837	0.0296618	0.0295008	0.0275362	0.0291143
walk3	0.0094686	0.010467	0.011723	0.00547504	0.0134944	0.0166828	0.0133011	0.00721417	0.00814815	0.00950081	0.0144283	0.0151369	0.0126248	0.0103704	0.0126892	0.0110467	0.0127536	0.0134299	0.00714976	0.00405797	0.00927536	0.010789	0.0127214	0.0207407	0.12	0.128889	0.132399	0.10657	0.090628	0.0835105	0.0736876	0.0846055	0.0883414	0.0724638	0.0615459	0.0665056	0.0512399	0.049533	0.0686956	0.0698873	0.0767472	0.0552979	0.0587118	0.0472142	0.0456361	0.0544283	0.0469565	0.0551691	0.0549758
probe5	0.00605475	0.00563607	0.0117874	0.0109823	0.00708535	0.0105958	0.0120773	0.00917874	0.00824477	0.00299517	0.00441224	0.00798712	0.00293076	0.00747182	0.0116586	0.00818035	0.00499195	0.00995169	0.00618357	0.00357488	0.00328502	0.00312399	0.00276973	0.00441224	0.142899	0.263382	0.170725	0.0889211	0.0700483	0.0494686	0.0500805	0.0577778	0.0613849	0.0467633	0.0362641	0.0509501	0.0483736	0.0434783	0.0431884	0.0286312	0.0409018	0.0388728	0.0375845	0.0351047	0.0313044	0.0266345	0.021868	0.0327858	0.0349436
fly2	0	0	0.00019324	0	0	0.00109501	0.00115942	0	0	0.00070853	0	0.00022544	0.00061192	0.00128824	0.00028986	0	3.22e-05	0	0.00083736	0.0005153	0	0	0	0.0005153	0.0143317	0.00328502	0.00753623	0.00286634	0.00222222	0.0015781	0.00621578	0.00228663	0.00012882	0.00183575	0.00099839	0.00096618	0.00170692	0.00086957	0.00392915	0.00247987	0.00038647	0.00180354	0.00180354	0.00276973	0.00064412	0	0.00186795	0.00115942	0.0010306
Light
time	-120	-114.975	-109.951	-104.926	-99.9015	-94.8768	-89.8522	-84.8276	-79.803	-74.7783	-69.7537	-64.7291	-59.7044	-54.6798	-49.6552	-44.6305	-39.6059	-34.5813	-29.5567	-24.532	-19.5074	-14.4828	-9.45813	-4.4335	0.591133	5.61576	10.6404	15.665	20.6897	25.7143	30.7389	35.7635	40.7882	45.8128	50.8374	55.8621	60.8867	65.9113	70.936	75.9606	80.9852	86.0099	91.0345	96.0591	101.084	106.108	111.133	116.158	121.182
groom3	0.039066	0.0393559	0.0474396	0.0547182	0.0440902	0.0428341	0.0358454	0.0460547	0.0405797	0.0566184	0.0508213	0.0525926	0.0589694	0.0448309	0.0513688	0.0476651	0.0450241	0.046248	0.0566828	0.0567472	0.0638969	0.0592915	0.053591	0.0557488	0.0285668	0.0326892	0.0251852	0.0279871	0.0250564	0.0247665	0.0261192	0.0334622	0.023124	0.0308857	0.0281803	0.0196135	0.0157488	0.0199034	0.0130113	0.0152013	0.0150081	0.0175845	0.0295008	0.0239936	0.0219646	0.0193559	0.0224799	0.0276973	0.0139775
walk3	0.00866345	0.0089533	0.00782609	0.0125282	0.00879227	0.00779388	0.00644122	0.0103704	0.00937198	0.0138164	0.0115298	0.0134299	0.0134622	0.0134944	0.0180032	0.0174235	0.0159098	0.0126892	0.0102416	0.0102093	0.00708535	0.0100483	0.0140419	0.0142351	0.0163929	0.0257327	0.033752	0.0587118	0.0381965	0.0386473	0.0544606	0.060934	0.075781	0.0766184	0.0892432	0.0843478	0.0781965	0.0854428	0.0772947	0.08438	0.0983575	0.0828341	0.077971	0.073591	0.0523027	0.0690821	0.058905	0.0639936	0.0635105
probe5	0.0068277	0.0036715	0.00457327	0.00312399	0.0102416	0.00492754	0.00566828	0.00611916	0.0105314	0.00943639	0.00859903	0.00863124	0.00486312	0.00547504	0.00592593	0.00289855	0.00721417	0.00982287	0.00866345	0.0112399	0.00911433	0.00724638	0.0118841	0.0103382	0.053752	0.0647987	0.110531	0.110982	0.107665	0.114332	0.11343	0.115427	0.114944	0.116522	0.129436	0.122383	0.106377	0.133688	0.110692	0.1038	0.0948792	0.0736232	0.0600966	0.0555878	0.0349759	0.0522705	0.0583897	0.0537842	0.039227
fly2	0	0.00057971	0.00025765	0	0.00064412	0.00045089	0.00022544	0.00038647	0	0	0.00041868	0.00028986	0	0.00032206	0.00109501	0	0	0	0.00196457	0.00161031	0	0	0	0.00041868	0.0841868	0.00077295	0.00409018	0.00132045	0.00112721	0.0026409	0.00354267	0.0104026	0.00673108	0.00689211	0.0020934	0.00231884	0.0037037	0.00383253	0.00351047	0.00505636	0.00608696	0.00112721	0.00360709	0.00109501	0.00244767	0.00199678	0.00338164	0.00415459	0.00183575
Heat + Light
time	-120	-114.975	-109.951	-104.926	-99.9015	-94.8768	-89.8522	-84.8276	-79.803	-74.7783	-69.7537	-64.7291	-59.7044	-54.6798	-49.6552	-44.6305	-39.6059	-34.5813	-29.5567	-24.532	-19.5074	-14.4828	-9.45813	-4.4335	0.591133	5.61576	10.6404	15.665	20.6897	25.7143	30.7389	35.7635	40.7882	45.8128	50.8374	55.8621	60.8867	65.9113	70.936	75.9606	80.9852	86.0099	91.0345	96.0591	101.084	106.108	111.133	116.158	121.182
groom3	0.0503382	0.0526892	0.0428019	0.0533655	0.0395169	0.0386473	0.0397746	0.0374235	0.0321417	0.0356522	0.0524638	0.0476006	0.0428986	0.0476006	0.0490821	0.052657	0.0490821	0.0459903	0.0455717	0.0455717	0.0448631	0.049211	0.0539453	0.0401288	0.0435749	0.0319163	0.0299839	0.029533	0.0333011	0.0340419	0.0275684	0.0239613	0.023446	0.0203221	0.0236071	0.0319807	0.0303704	0.0235427	0.0241224	0.0335266	0.0305636	0.0297584	0.0208052	0.0228986	0.0221256	0.0224155	0.0198068	0.0204509	0.0172625
walk3	0.00602254	0.00602254	0.00351047	0.00676329	0.0118519	0.00663446	0.00325282	0.0078905	0.0103382	0.00927536	0.00782609	0.00624799	0.00692432	0.00444444	0.00801932	0.0106924	0.0078905	0.00908213	0.00624799	0.00499195	0.00161031	0.00679549	0.0126892	0.00982287	0.0180032	0.0856361	0.116006	0.102287	0.0769404	0.0793237	0.108567	0.125475	0.107343	0.104831	0.108986	0.107536	0.118422	0.135137	0.143961	0.131755	0.129308	0.100805	0.107665	0.123897	0.113559	0.103961	0.103414	0.10628	0.110403
probe5	0.00611916	0.00357488	0.0041868	0.0094686	0.00985507	0.0116264	0.00950081	0.00605475	0.00714976	0.00750403	0.00553945	0.00637681	0.00563607	0.00589372	0.00228663	0.00289855	0.00882448	0.00859903	0.0089211	0.00660225	0.00644122	0.00376812	0.00309179	0.00502415	0.0557166	0.0506924	0.0904026	0.103446	0.0939775	0.0908535	0.0839291	0.115105	0.0859903	0.10628	0.103961	0.0891787	0.099227	0.0866023	0.0967472	0.0947182	0.0941385	0.101868	0.0908535	0.0788406	0.0633494	0.0665701	0.0765539	0.0770692	0.0695652
fly2	0.00016103	0.00135266	0	0.00267311	0	0	0	0.00028986	0.00032206	0	0.00154589	0.00086957	0	0	9.66e-05	0	0.00016103	0.0010628	0	0	0	0	0.00025765	0.0010306	0.103478	0.00624799	0.00747182	0.0052818	0.00466989	0.00608696	0.00486312	0.00035427	0.0015781	0.00328502	0.00444444	0.00019324	0.00563607	0.00354267	0.00325282	0.00225443	0.00521739	0.0041868	0.00357488	0.00154589	0.00132045	0.00122383	0.00219002	0.00061192	0.00431562
[truncated: 155 more columns]

## Sheet: Figure 2K
Figure 2K
Walking	mosquito	behavior_prop	stimulus		Probing	mosquito	behavior_prop	stimulus
	0	0	heatonly			0	0	heatonly
	0	0.124	greenlightonly			0	0.0391481	greenlightonly
	0	0.00640741	simultaneous			0	0.00888889	simultaneous
	1	0.0168148	heatonly			1	0.00774074	heatonly
	1	0.0127778	greenlightonly			1	0.00133333	greenlightonly
	1	0.0228519	simultaneous			1	0.001	simultaneous
	2	0.157815	heatonly			2	0.0205926	heatonly
	2	0.00959259	greenlightonly			2	0.00514815	greenlightonly
	2	0.045963	simultaneous			2	0.0211852	simultaneous
	3	0.00266667	heatonly			3	0.000259259	heatonly
	3	0.0797037	greenlightonly			3	0.022037	greenlightonly
	3	0.0605185	simultaneous			3	0.0574074	simultaneous
	4	0.0998148	heatonly			4	0.0260741	heatonly
	4	0.00192593	greenlightonly			4	0	greenlightonly
	4	0.00992593	simultaneous			4	0	simultaneous
	5	0.10463	heatonly			5	0.0143704	heatonly
	5	0.0124444	greenlightonly			5	0.0364444	greenlightonly
	5	0.021963	simultaneous			5	0.0328148	simultaneous
	6	0.000740741	heatonly			6	0	heatonly
	6	0.00037037	greenlightonly			6	0.00140741	greenlightonly
	6	0.0239259	simultaneous			6	0.0104444	simultaneous
	7	0.00892593	heatonly			7	0.000296296	heatonly
	7	0.00748148	greenlightonly			7	0.000703704	greenlightonly
	7	0.00114815	simultaneous			7	0.00122222	simultaneous
	8	0.0175926	heatonly			8	0	heatonly
	8	0.0573704	greenlightonly			8	0.00159259	greenlightonly
	8	0.00514815	simultaneous			8	0	simultaneous
	9	0.003	heatonly			9	0.00518519	heatonly
	9	0.00181481	greenlightonly			9	0.00659259	greenlightonly
	9	0	simultaneous			9	0	simultaneous
	10	0.00607407	heatonly			10	0.00277778	heatonly
	10	0	greenlightonly			10	0	greenlightonly
	10	0.0113333	simultaneous			10	0.000777778	simultaneous
	11	0.0295185	heatonly			11	0.00433333	heatonly
	11	0.00177778	greenlightonly			11	0	greenlightonly
	11	0.0201111	simultaneous			11	0	simultaneous
	12	0.00855556	heatonly			12	0.00577778	heatonly
	12	0.0741481	greenlightonly			12	0.00544444	greenlightonly
	12	0.00192593	simultaneous			12	0.00988889	simultaneous
	13	0.0167407	heatonly			13	0.00314815	heatonly
	13	0.00288889	greenlightonly			13	0.000444444	greenlightonly
	13	0.0384444	simultaneous			13	0.000925926	simultaneous
	14	0.0072963	heatonly			14	0.0316296	heatonly
	14	0.123593	greenlightonly			14	0.0285185	greenlightonly
	14	0.0911852	simultaneous			14	0.0193333	simultaneous
	15	0.0177407	heatonly			15	0.00707407	heatonly
	15	0.239037	greenlightonly			15	0.0100741	greenlightonly
	15	0.138926	simultaneous			15	0.0486667	simultaneous
	16	0.0823333	heatonly			16	0.0113704	heatonly
	16	0.0415185	greenlightonly			16	0.0384815	greenlightonly
	16	0.0202593	simultaneous			16	0.0218519	simultaneous
	17	0.0475556	heatonly			17	0.00318519	heatonly
	17	0.122222	greenlightonly			17	0.0269259	greenlightonly
	17	0.146407	simultaneous			17	0.0381852	simultaneous
	18	0.110444	heatonly			18	0.0373333	heatonly
	18	0.224593	greenlightonly			18	0.0203704	greenlightonly
	18	0.0914444	simultaneous			18	0.00462963	simultaneous
	19	0.0421481	heatonly			19	0.0211852	heatonly
	19	0.0971481	greenlightonly			19	0.0157407	greenlightonly
	19	0.125	simultaneous			19	0.0115185	simultaneous
	20	0.049963	heatonly			20	0.00381481	heatonly
	20	0.151778	greenlightonly			20	0.0152222	greenlightonly
	20	0.17663	simultaneous			20	0.00862963	simultaneous
	21	0.198815	heatonly			21	0.0720741	heatonly
	21	0.026	greenlightonly			21	0.000777778	greenlightonly
	21	0.24837	simultaneous			21	0.038037	simultaneous
	22	0.0362963	heatonly			22	0.0114444	heatonly
	22	0.0708148	greenlightonly			22	0.00540741	greenlightonly
	22	0.0533333	simultaneous			22	0.0104815	simultaneous
	23	0.139407	heatonly			23	0.0148148	heatonly
	23	0.155222	greenlightonly			23	0.0365556	greenlightonly
	23	0.0900741	simultaneous			23	0.0121481	simultaneous
	24	0.147481	heatonly			24	0.0532593	heatonly
	24	0.004	greenlightonly			24	0	greenlightonly
	24	0.0508519	simultaneous			24	0.0164444	simultaneous
	25	0.103778	heatonly			25	0.0121852	heatonly
	25	0.0971852	greenlightonly			25	0.00866667	greenlightonly
	25	0.0772963	simultaneous			25	0.021	simultaneous
	26	0.151556	heatonly			26	0.0348148	heatonly
	26	0.252815	greenlightonly			26	0.0602593	greenlightonly
	26	0.0895556	simultaneous			26	0.00540741	simultaneous
	27	0.266593	heatonly			27	0.0217037	heatonly
	27	0.140296	greenlightonly			27	0.0251481	greenlightonly
	27	0.0965185	simultaneous			27	0.0307037	simultaneous
	28	0.0277037	heatonly			28	0.152444	heatonly
	28	0.0131111	greenlightonly			28	0.00425926	greenlightonly
	28	0.0262963	simultaneous			28	0.01	simultaneous
	29	0.00959259	heatonly			29	0	heatonly
	29	0.025037	greenlightonly			29	0.000222222	greenlightonly
	29	0.0194815	simultaneous			29	0	simultaneous
	30	0	heatonly			30	0	heatonly
	30	0	greenlightonly			30	0	greenlightonly
	30	0.00166667	simultaneous			30	0.000407407	simultaneous
	31	0.00422222	heatonly			31	0.00425926	heatonly
	31	0.0466667	greenlightonly			31	0.00925926	greenlightonly
	31	0.0557778	simultaneous			31	0.012963	simultaneous
	32	0.0388148	heatonly			32	0.0185185	heatonly
	32	0.0423704	greenlightonly			32	0.000814815	greenlightonly
	32	0.0483704	simultaneous			32	0.00833333	simultaneous
	33	0.000703704	heatonly			33	0.00192593	heatonly
	33	0.00251852	greenlightonly			33	0.00255556	greenlightonly
	33	0.032037	simultaneous			33	0.00492593	simultaneous
	34	0.00940741	heatonly			34	0	heatonly
	34	0.0348519	greenlightonly			34	0.0067037	greenlightonly
	34	0.0621111	simultaneous			34	0.00781481	simultaneous
	35	0.0232963	heatonly			35	0.00155556	heatonly
	35	0.141815	greenlightonly			35	0.00514815	greenlightonly
	35	0.021	simultaneous			35	0	simultaneous
	36	0.003	heatonly			36	0	heatonly
	36	0	greenlightonly			36	0	greenlightonly
	36	0.00462963	simultaneous			36	0	simultaneous
	37	0.00414815	heatonly			37	0.000444444	heatonly
	37	0.0072963	greenlightonly			37	0	greenlightonly
	37	0.0103333	simultaneous			37	0.00288889	simultaneous
	38	0.083	heatonly			38	0.0228148	heatonly
	38	0.218444	greenlightonly			38	0.0217407	greenlightonly
	38	0.0834815	simultaneous			38	0.00788889	simultaneous
	39	0.0124815	heatonly			39	0	heatonly
	39	0.0388148	greenlightonly			39	0.00133333	greenlightonly
	39	0.0936296	simultaneous			39	0.00488889	simultaneous
	40	0.0572593	heatonly			40	0.00507407	heatonly
	40	0.035	greenlightonly			40	0.00281481	greenlightonly
	40	0.0533704	simultaneous			40	0.00581481	simultaneous
	41	0	heatonly			41	0	heatonly
	41	0.00244444	greenlightonly			41	0.00125926	greenlightonly
	41	0	simultaneous			41	0	simultaneous
	42	0.276889	heatonly			42	0.0844074	heatonly
	42	0.329185	greenlightonly			42	0.0696667	greenlightonly
	42	0.165556	simultaneous			42	0.031037	simultaneous
	43	0.08	heatonly			43	0.0118148	heatonly
	43	0.150741	greenlightonly			43	0.0283704	greenlightonly
	43	0.0480741	simultaneous			43	0.00366667	simultaneous
	44	0.0115926	heatonly			44	0	heatonly
	44	0.0635556	greenlightonly			44	0.0128519	greenlightonly
	44	0.000777778	simultaneous			44	0.00237037	simultaneous
	45	0.0182963	heatonly			45	0	heatonly
	45	0.0226667	greenlightonly			45	0.0115926	greenlightonly
	45	0.0435556	simultaneous			45	0.00685185	simultaneous
	46	0.188593	heatonly			46	0.0788519	heatonly
	46	0.442593	greenlightonly			46	0.105741	greenlightonly
	46	0.413593	simultaneous			46	0.117593	simultaneous
	47	0.0526296	heatonly			47	0.00133333	heatonly
	47	0.0715185	greenlightonly			47	0.0282963	greenlightonly
	47	0.0775185	simultaneous			47	0.0161111	simultaneous
	48	0.00707407	heatonly			48	0.00522222	heatonly
	48	0.252852	greenlightonly			48	0.0658889	greenlightonly
	48	0.015963	simultaneous			48	0.00111111	simultaneous
	49	0.113481	heatonly			49	0.0367037	heatonly
	49	0.128037	greenlightonly			49	0.0678519	greenlightonly
	49	0.136259	simultaneous			49	0.0811481	simultaneous
	50	0	heatonly			50	0	heatonly
	50	0.00648148	greenlightonly			50	0.000962963	greenlightonly
	50	0.000296296	simultaneous			50	0.000296296	simultaneous
	51	0.00922222	heatonly			51	0.000925926	heatonly
	51	0.111481	greenlightonly			51	0.0141481	greenlightonly
	51	0.0132963	simultaneous			51	0.000518519	simultaneous
	52	0.00985185	heatonly			52	0	heatonly
	52	0.0351111	greenlightonly			52	0.002	greenlightonly
	52	0.186704	simultaneous			52	0.0037037	simultaneous
	53	0.233481	heatonly			53	0.0315556	heatonly
	53	0.316593	greenlightonly			53	0.0346296	greenlightonly
	53	0.0531852	simultaneous			53	0.00488889	simultaneous
	54	0.162407	heatonly			54	0.0465926	heatonly
	54	0.127741	greenlightonly			54	0.0431111	greenlightonly
	54	0.211407	simultaneous			54	0.0341481	simultaneous
	55	0.0574815	heatonly			55	0.00711111	heatonly
	55	0.0542593	greenlightonly			55	0.00118519	greenlightonly
	55	0.0357778	simultaneous			55	0.000851852	simultaneous
	56	0	heatonly			56	0.00596296	heatonly
	56	0.0124074	greenlightonly			56	0.0142222	greenlightonly
	56	0.003	simultaneous			56	0.000777778	simultaneous
	57	0.00988889	heatonly			57	0.00577778	heatonly
	57	0.161481	greenlightonly			57	0.00240741	greenlightonly
	57	0.0118519	simultaneous			57	0.00281481	simultaneous
	58	0.01	heatonly			58	0	heatonly
	58	0.147519	greenlightonly			58	0.00533333	greenlightonly
	58	0.0148519	simultaneous			58	0.00133333	simultaneous
	59	0.007	heatonly			59	0.00159259	heatonly
	59	0.0012963	greenlightonly			59	0	greenlightonly
	59	0.0104444	simultaneous			59	0.00488889	simultaneous
	60	0.0673704	heatonly			60	0.0144074	heatonly
	60	0.0160741	greenlightonly			60	0.00137037	greenlightonly
	60	0.0318519	simultaneous			60	0.00881481	simultaneous
	61	0.0368519	heatonly			61	0.0145926	heatonly
	61	0.0222222	greenlightonly			61	0.00266667	greenlightonly
	61	0.0258148	simultaneous			61	0.00411111	simultaneous
	62	0	heatonly			62	0.00137037	heatonly
	62	0.0901481	greenlightonly			62	0.0214074	greenlightonly
	62	0.000444444	simultaneous			62	0.00540741	simultaneous
	63	0.0896667	heatonly			63	0.00940741	heatonly
	63	0.020037	greenlightonly			63	0.000592593	greenlightonly
	63	0.00744444	simultaneous			63	0.00107407	simultaneous
	64	0.0157037	heatonly			64	0	heatonly
	64	0	greenlightonly			64	0	greenlightonly
	64	0.0578148	simultaneous			64	0.00659259	simultaneous
	65	0.0134815	heatonly			65	0	heatonly
	65	0.00755556	greenlightonly			65	0.000296296	greenlightonly
	65	0.00803704	simultaneous			65	0.00181481	simultaneous
	66	0.00755556	heatonly			66	0.000222222	heatonly
	66	0.0107407	greenlightonly			66	0.00303704	greenlightonly
	66	0.0057037	simultaneous			66	0.00114815	simultaneous
	67	0.00733333	heatonly			67	0.00140741	heatonly
	67	0.00407407	greenlightonly			67	0	greenlightonly
	67	0.0204074	simultaneous			67	0.00685185	simultaneous
	68	0	heatonly			68	0	heatonly
	68	0	greenlightonly			68	0.00125926	greenlightonly
	68	0.0219259	simultaneous			68	0.00585185	simultaneous
	69	0.00174074	heatonly			69	0.00625926	heatonly
	69	0	greenlightonly			69	0.000259259	greenlightonly
	69	0	simultaneous			69	0	simultaneous
	70	0.0698889	heatonly			70	0.0112222	heatonly
	70	0.0112963	greenlightonly			70	0.00237037	greenlightonly
	70	0.000185185	simultaneous			70	0	simultaneous
	71	0.167111	heatonly			71	0.021963	heatonly
	71	0.0437778	greenlightonly			71	0.00362963	greenlightonly
	71	0.094963	simultaneous			71	0.0122593	simultaneous
	72	0	heatonly			72	0	heatonly
	72	0.0315926	greenlightonly			72	0.000259259	greenlightonly
	72	0.139296	simultaneous			72	0.0174444	simultaneous
	73	0.0012963	heatonly			73	0.000703704	heatonly
	73	0.00466667	greenlightonly			73	0.00107407	greenlightonly
	73	0.0953333	simultaneous			73	0.0032963	simultaneous
	74	0.0904444	heatonly			74	0.0132222	heatonly
	74	0.0217037	greenlightonly			74	0.00674074	greenlightonly
	74	0.0685926	simultaneous			74	0.0106667	simultaneous
	75	0.0222963	heatonly			75	0.0155185	heatonly
	75	0.00351852	greenlightonly			75	0.00162963	greenlightonly
	75	0.0107778	simultaneous			75	0.00885185	simultaneous
	76	0.0370741	heatonly			76	0.072	heatonly
	76	0.0708519	greenlightonly			76	0.00777778	greenlightonly
	76	0.0821852	simultaneous			76	0.0072963	simultaneous
	77	0.0196296	heatonly			77	0.00366667	heatonly
	77	0.00837037	greenlightonly			77	0.00159259	greenlightonly
	77	0.0548148	simultaneous			77	0.00222222	simultaneous
	78	0.115333	heatonly			78	0.00466667	heatonly
	78	0.0124074	greenlightonly			78	0.000333333	greenlightonly
	78	0.0800741	simultaneous			78	0.00285185	simultaneous
	79	0.00485185	heatonly			79	0.00274074	heatonly
	79	0.181	greenlightonly			79	0.00677778	greenlightonly
	79	0.171259	simultaneous			79	0.0087037	simultaneous
	80	0.011	heatonly			80	0	heatonly
	80	0.0341481	greenlightonly			80	0.0057037	greenlightonly
	80	0.00388889	simultaneous			80	0.000222222	simultaneous
	81	0.0765556	heatonly			81	0.007	heatonly
	81	0.171074	greenlightonly			81	0.0142963	greenlightonly
	81	0.438333	simultaneous			81	0.0335556	simultaneous
	82	0.0585926	heatonly			82	0.00318519	heatonly
	82	0	greenlightonly			82	0.0121481	greenlightonly
	82	0.0617037	simultaneous			82	0.0202222	simultaneous
	83	0.00037037	heatonly			83	0	heatonly
	83	0.0206667	greenlightonly			83	0.00666667	greenlightonly
	83	0.0231111	simultaneous			83	0.000888889	simultaneous
	84	0.0147778	heatonly			84	0	heatonly
	84	0.0430741	greenlightonly			84	0.000333333	greenlightonly
	84	0.0454815	simultaneous			84	0	simultaneous
	85	0.109148	heatonly			85	0.00885185	heatonly
	85	0.135444	greenlightonly			85	0.0138519	greenlightonly
	85	0.0965926	simultaneous			85	0.0135926	simultaneous
	86	0.0145556	heatonly			86	0.00240741	heatonly
	86	0.0451481	greenlightonly			86	0.0202222	greenlightonly
	86	0.0219259	simultaneous			86	0.00207407	simultaneous
	87	0.0412963	heatonly			87	0.000555556	heatonly
	87	0.147111	greenlightonly			87	0.00740741	greenlightonly
	87	0.166444	simultaneous			87	0.0125185	simultaneous
	88	0.0168889	heatonly			88	0.0201852	heatonly
	88	0.124222	greenlightonly			88	0.0241111	greenlightonly
	88	0.0352963	simultaneous			88	0.000925926	simultaneous
	89	0.110889	heatonly			89	0.006	heatonly
	89	0.0445185	greenlightonly			89	0.000888889	greenlightonly
	89	0.00607407	simultaneous			89	0.00166667	simultaneous
	90	0	heatonly			90	0	heatonly
	90	0	greenlightonly			90	0	greenlightonly
	90	0.00351852	simultaneous			90	0	simultaneous
	91	0.0172963	heatonly			91	0.00507407	heatonly
	91	0.0735185	greenlightonly			91	0.00733333	greenlightonly
	91	0.00433333	simultaneous			91	0.000407407	simultaneous
	92	0.0267778	heatonly			92	0.00514815	heatonly
	92	0.004	greenlightonly			92	0.00374074	greenlightonly
	92	0.0793704	simultaneous			92	0.00177778	simultaneous
	93	0.0027037	heatonly			93	0.00174074	heatonly
	93	0.116741	greenlightonly			93	0.0135185	greenlightonly
	93	0.00292593	simultaneous			93	0.0196667	simultaneous
	94	0.00703704	heatonly			94	0	heatonly
	94	0.0142593	greenlightonly			94	0.00062963	greenlightonly
	94	0.0122222	simultaneous			94	0	simultaneous
	95	0.0554444	heatonly			95	0.0132593	heatonly
	95	0.0261852	greenlightonly			95	0.00277778	greenlightonly
	95	0.115111	simultaneous			95	0.00922222	simultaneous
	96	0	heatonly			96	0.000925926	heatonly
	96	0	greenlightonly			96	0	greenlightonly
	96	0.00451852	simultaneous			96	0	simultaneous
	97	0.00166667	heatonly			97	0	heatonly
	97	0.0101481	greenlightonly			97	0	greenlightonly
	97	0.0159259	simultaneous			97	0	simultaneous
	98	0.12637	heatonly			98	0.0538148	heatonly
	98	0.0225185	greenlightonly			98	0.00237037	greenlightonly
	98	0.0360741	simultaneous			98	0.00614815	simultaneous
	99	0.0591852	heatonly			99	0.0177407	heatonly
	99	0.177296	greenlightonly			99	0.0436296	greenlightonly
	99	0.127963	simultaneous			99	0.0415926	simultaneous
	100	0.0177407	heatonly			100	0.000222222	heatonly
	100	0.0432963	greenlightonly			100	0.00155556	greenlightonly
	100	0.0975556	simultaneous			100	0.00181481	simultaneous
	101	0.0880741	heatonly			101	0.0118148	heatonly
	101	0.0417407	greenlightonly			101	0.0105926	greenlightonly
	101	0.085	simultaneous			101	0.0203704	simultaneous
	102	0.00155556	heatonly			102	0.001	heatonly
	102	0	greenlightonly			102	0.000888889	greenlightonly
	102	0.00785185	simultaneous			102	0	simultaneous
	103	0.0217407	heatonly			103	0.00377778	heatonly
	103	0.121852	greenlightonly			103	0.0222222	greenlightonly
	103	0.00955556	simultaneous			103	0.000259259	simultaneous
	104	0	heatonly			104	0	heatonly
	104	0.0644444	greenlightonly			104	0.0022963	greenlightonly
	104	0.0574074	simultaneous			104	0.00325926	simultaneous
	105	0.00314815	heatonly			105	0.0153333	heatonly
	105	0.108889	greenlightonly			105	0.0286667	greenlightonly
	105	0.152148	simultaneous			105	0.0234444	simultaneous
	106	0.0125556	heatonly			106	0.00162963	heatonly
	106	0.111593	greenlightonly			106	0.004	greenlightonly
	106	0	simultaneous			106	0	simultaneous
	107	0.0571481	heatonly			107	0.00911111	heatonly
	107	0.0368148	greenlightonly			107	0.00151852	greenlightonly
	107	0.0123704	simultaneous			107	0.00433333	simultaneous
	108	0.039037	heatonly			108	0.000481481	heatonly
	108	0.174556	greenlightonly			108	0.00548148	greenlightonly
	108	0.180074	simultaneous			108	0.00825926	simultaneous
	109	0.247815	heatonly			109	0.0206667	heatonly
	109	0.258593	greenlightonly			109	0.0303704	greenlightonly
	109	0.222815	simultaneous			109	0.0327407	simultaneous
	110	0.179444	heatonly			110	0.0199259	heatonly
	110	0.15737	greenlightonly			110	0.0140741	greenlightonly
	110	0.188593	simultaneous			110	0.0037037	simultaneous
	111	0.0141481	heatonly			111	0.0117407	heatonly
	111	0.0211111	greenlightonly			111	0.00140741	greenlightonly
	111	0.0288889	simultaneous			111	0	simultaneous
	112	0.0464074	heatonly			112	0.00337037	heatonly
	112	0.14237	greenlightonly			112	0.0137037	greenlightonly
	112	0.201074	simultaneous			112	0.0140741	simultaneous
	113	0.0351852	heatonly			113	0	heatonly
	113	0.00681481	greenlightonly			113	0.00203704	greenlightonly
	113	0.0205556	simultaneous			113	0.000518519	simultaneous
	114	0	heatonly			114	0	heatonly
	114	0	greenlightonly			114	0	greenlightonly
	114	0	simultaneous			114	0	simultaneous
	115	0.0112222	heatonly			115	0	heatonly
	115	0.0225926	greenlightonly			115	0.000777778	greenlightonly
	115	0.0118889	simultaneous			115	0.00266667	simultaneous
	116	0.001	heatonly			116	0	heatonly
	116	0.0624074	greenlightonly			116	0.00296296	greenlightonly
	116	0.0704815	simultaneous			116	0.00037037	simultaneous
	117	0.0538519	heatonly			117	0.000851852	heatonly
	117	0.0253704	greenlightonly			117	0	greenlightonly
	117	0.0423704	simultaneous			117	0.00281481	simultaneous
	118	0.0149259	heatonly			118	0.000222222	heatonly
	118	0.0187778	greenlightonly			118	0.00392593	greenlightonly
	118	0.0594815	simultaneous			118	0.00822222	simultaneous
	119	0.039	heatonly			119	0.000777778	heatonly
	119	0.0315185	greenlightonly			119	0.00144444	greenlightonly
	119	0.0171481	simultaneous			119	0.000222222	simultaneous
	120	0.00196296	heatonly			120	0.00481481	heatonly
	120	0	greenlightonly			120	0	greenlightonly
	120	0	simultaneous			120	0	simultaneous
	121	0.0475556	heatonly			121	0.00181481	heatonly
	121	0.0101852	greenlightonly			121	0.00262963	greenlightonly
	121	0.0298519	simultaneous			121	0.00392593	simultaneous
	122	0.00344444	heatonly			122	0.00037037	heatonly
	122	0.00537037	greenlightonly			122	0	greenlightonly
	122	0.000518519	simultaneous			122	0.000666667	simultaneous
	123	0.174037	heatonly			123	0.0042963	heatonly
	123	0.129926	greenlightonly			123	0.00188889	greenlightonly
	123	0.00288889	simultaneous			123	0	simultaneous
	124	0.025963	heatonly			124	0.0142222	heatonly
	124	0.0105556	greenlightonly			124	0.00388889	greenlightonly
	124	0.0624074	simultaneous			124	0.00137037	simultaneous
	125	0.00274074	heatonly			125	0	heatonly
	125	0.00459259	greenlightonly			125	0.000222222	greenlightonly
	125	0.0295556	simultaneous			125	0.000333333	simultaneous
	126	0.107222	heatonly			126	0.00585185	heatonly
	126	0.0144815	greenlightonly			126	0	greenlightonly
	126	0.0342593	simultaneous			126	0.00062963	simultaneous
	127	0.0355926	heatonly			127	0.0147037	heatonly
	127	0.0343333	greenlightonly			127	0.00207407	greenlightonly
	127	0.0432593	simultaneous			127	0.00374074	simultaneous
	128	0.198519	heatonly			128	0.0253704	heatonly
	128	0.128296	greenlightonly			128	0.0172963	greenlightonly
	128	0.21863	simultaneous			128	0.0479259	simultaneous
	129	0.0913333	heatonly			129	0.00403704	heatonly
	129	0.00159259	greenlightonly			129	0.00062963	greenlightonly
	129	0.0247037	simultaneous			129	0.00174074	simultaneous
	130	0.0580741	heatonly			130	0.00325926	heatonly
	130	0.141963	greenlightonly			130	0.0308519	greenlightonly
	130	0.0642222	simultaneous			130	0.0152593	simultaneous
	131	0.0542593	heatonly			131	0.00103704	heatonly
	131	0.042037	greenlightonly			131	0.00248148	greenlightonly
	131	0.0498519	simultaneous			131	0.00918519	simultaneous
	132	0	heatonly			132	0	heatonly
	132	0.0251852	greenlightonly			132	0.000814815	greenlightonly
	132	0.0578889	simultaneous			132	0.0032963	simultaneous
	133	0.165	heatonly			133	0.0092963	heatonly
	133	0.0605926	greenlightonly			133	0.0104815	greenlightonly
	133	0.0337037	simultaneous			133	0.00481481	simultaneous
	134	0.00062963	heatonly			134	0.00214815	heatonly
	134	0.0207778	greenlightonly			134	0.00322222	greenlightonly
	134	0.0309259	simultaneous			134	0	simultaneous
	135	0.152148	heatonly			135	0.00385185	heatonly
	135	0.342296	greenlightonly			135	0.0477778	greenlightonly
	135	0.051963	simultaneous			135	0.00744444	simultaneous
	136	0.00633333	heatonly			136	0.000259259	heatonly
	136	0.025	greenlightonly			136	0	greenlightonly
	136	0.166259	simultaneous			136	0.00581481	simultaneous
	137	0.00974074	heatonly			137	0.00711111	heatonly
	137	0.0027037	greenlightonly			137	0.00151852	greenlightonly
	137	0.0176667	simultaneous			137	0.0101111	simultaneous
	138	0.0247037	heatonly			138	0.00111111	heatonly
	138	0.0318519	greenlightonly			138	0.00822222	greenlightonly
	138	0.121556	simultaneous			138	0.0037037	simultaneous
	139	0.048	heatonly			139	0.00751852	heatonly
	139	0.110333	greenlightonly			139	0.0383333	greenlightonly
	139	0.0465556	simultaneous			139	0.016037	simultaneous

## Sheet: Figure 2L
Figure 2L
Walking	mosquito	behavior_prop	stimulus		Probing	mosquito	behavior_prop	stimulus
	0	0.099	heat			0	0.030963	heat
	0	0.0402222	light			0	0.014037	light
	0	0.100185	simultaneous			0	0.067963	simultaneous
	1	0.0695926	heat			1	0.0323704	heat
	1	0.169741	light			1	0.0472222	light
	1	0.0867407	simultaneous			1	0.0134815	simultaneous
	2	0.0152593	heat			2	0.00107407	heat
	2	0.00355556	light			2	0.0144074	light
	2	0.0504074	simultaneous			2	0.00455556	simultaneous
	3	0.00133333	heat			3	0.0154815	heat
	3	0.150407	light			3	0.022037	light
	3	0.0793333	simultaneous			3	0.0124815	simultaneous
	4	0.0127037	heat			4	0.00633333	heat
	4	0.00662963	light			4	0.0265185	light
	4	0.0291852	simultaneous			4	0.0416296	simultaneous
	5	0.0881852	heat			5	0	heat
	5	0.0169259	light			5	0.029	light
	5	0.0153333	simultaneous			5	0.010963	simultaneous
	6	0.0269259	heat			6	0.0153333	heat
	6	0.0850741	light			6	0.0101111	light
	6	0.039037	simultaneous			6	0.012	simultaneous
	7	0	heat			7	0.0112222	heat
	7	0.0134815	light			7	0.022	light
	7	0.0166296	simultaneous			7	0.0181852	simultaneous
	8	0.0214074	heat			8	0.0220741	heat
	8	0.0655185	light			8	0.0535926	light
	8	0.0601481	simultaneous			8	0.0377778	simultaneous
	9	0.0128148	heat			9	0.00385185	heat
	9	0.0718519	light			9	0.124852	light
	9	0.0554074	simultaneous			9	0.0134444	simultaneous
	10	0.311037	heat			10	0.0819259	heat
	10	0.0307037	light			10	0.0113333	light
	10	0.0870741	simultaneous			10	0.00925926	simultaneous
	11	0	heat			11	0.002	heat
	11	0.0345926	light			11	0.00192593	light
	11	0.0211481	simultaneous			11	0.00455556	simultaneous
	12	0.00937037	heat			12	0.0121852	heat
	12	0.0261481	light			12	0.0082963	light
	12	0.021037	simultaneous			12	0.00881481	simultaneous
	13	0	heat			13	0.00122222	heat
	13	0.0101481	light			13	0.0042963	light
	13	0.0476667	simultaneous			13	0.00866667	simultaneous
	14	0.0758519	heat			14	0.0677037	heat
	14	0.104333	light			14	0.148148	light
	14	0.0873704	simultaneous			14	0.0970741	simultaneous
	15	0.0267407	heat			15	0.0183333	heat
	15	0.0437037	light			15	0.0113333	light
	15	0.0790741	simultaneous			15	0.0937037	simultaneous
	16	0.0127407	heat			16	0.0386296	heat
	16	0.036963	light			16	0.0400741	light
	16	0.0128519	simultaneous			16	0.0217407	simultaneous
	17	0.0878519	heat			17	0.0408519	heat
	17	0.115667	light			17	0.165185	light
	17	0.279259	simultaneous			17	0.271407	simultaneous
	18	0.221037	heat			18	0.128222	heat
	18	0.00348148	light			18	0.012	light
	18	0.177963	simultaneous			18	0.119444	simultaneous
	19	0	heat			19	0	heat
	19	0.0163333	light			19	0.0161482	light
	19	0.0581481	simultaneous			19	0.0836667	simultaneous
	20	0.110333	heat			20	0.014037	heat
	20	0.0537778	light			20	0.0235185	light
	20	0.0887778	simultaneous			20	0.00566667	simultaneous
	21	0.261148	heat			21	0.120481	heat
	21	0.116111	light			21	0.144148	light
	21	0.562704	simultaneous			21	0.205481	simultaneous
	22	0.000444444	heat			22	0.0131111	heat
	22	0.0974074	light			22	0.0421111	light
	22	0.015037	simultaneous			22	0.0275926	simultaneous
	23	0.00037037	heat			23	0.0691852	heat
	23	0.0123704	light			23	0.0581852	light
	23	0	simultaneous			23	0.00166667	simultaneous
	24	0.0568519	heat			24	0.0171482	heat
	24	0.0195926	light			24	0.102444	light
	24	0.0712222	simultaneous			24	0.0704815	simultaneous
	25	0.0754444	heat			25	0.042	heat
	25	0.111852	light			25	0.0427407	light
	25	0.013037	simultaneous			25	0.0188518	simultaneous
	26	0.0258519	heat			26	0.00348148	heat
	26	0.0115926	light			26	0.0465185	light
	26	0.079037	simultaneous			26	0.0997407	simultaneous
	27	0.0711111	heat			27	0.0148148	heat
	27	0.118222	light			27	0.030963	light
	27	0.0646667	simultaneous			27	0.0223704	simultaneous
	28	0.00251852	heat			28	0.00085185	heat
	28	0.0102963	light			28	0.0103704	light
	28	0.0164815	simultaneous			28	0.0027037	simultaneous
	29	0.165593	heat			29	0.0535926	heat
	29	0.0077037	light			29	0.00022222	light
	29	0.0526296	simultaneous			29	0.00685185	simultaneous
	30	0.0108148	heat			30	0.027	heat
	30	0.0373704	light			30	0.00211111	light
	30	0.019037	simultaneous			30	0.0266296	simultaneous
	31	0.0372963	heat			31	0.0550741	heat
	31	0.0167778	light			31	0.0121481	light
	31	0.0271852	simultaneous			31	0.0524815	simultaneous
	32	0.00503704	heat			32	0.00092593	heat
	32	0.0102963	light			32	0.00281481	light
	32	0.189889	simultaneous			32	0.0895926	simultaneous
	33	0.192074	heat			33	0.0593704	heat
	33	0.104148	light			33	0.0148518	light
	33	0.117778	simultaneous			33	0.0386296	simultaneous
	34	0.00314815	heat			34	0.00044444	heat
	34	0.0228148	light			34	0.00203704	light
	34	0.0371481	simultaneous			34	0.00214815	simultaneous
	35	0.0313333	heat			35	0.00359259	heat
	35	0.000444444	light			35	0.00133333	light
	35	0.0017037	simultaneous			35	0.00318519	simultaneous
	36	0.0304815	heat			36	0.0176667	heat
	36	0.117407	light			36	0.144111	light
	36	0.245556	simultaneous			36	0.22637	simultaneous
	37	0.00862963	heat			37	0.0228148	heat
	37	0.0191852	light			37	0.0324444	light
	37	0.10737	simultaneous			37	0.0318889	simultaneous
	38	0	heat			38	0.00185185	heat
	38	0.0238148	light			38	0.00377778	light
	38	0.0836667	simultaneous			38	0.0303704	simultaneous
	39	0.00711111	heat			39	0.0157407	heat
	39	0.0621852	light			39	0.0690741	light
	39	0.116519	simultaneous			39	0.0467778	simultaneous
	40	0	heat			40	0.00255556	heat
	40	0.240741	light			40	0.0494444	light
	40	0.161	simultaneous			40	0.0595185	simultaneous
	41	0.00392593	heat			41	0	heat
	41	0.0685185	light			41	0.010963	light
	41	0.0921481	simultaneous			41	0.0145556	simultaneous
	42	0.076	heat			42	0.0877407	heat
	42	0.0227778	light			42	0.00603704	light
	42	0.0424815	simultaneous			42	0.0914815	simultaneous
	43	0.0105556	heat			43	0.00118519	heat
	43	0.0771111	light			43	0.119	light
	43	0.133556	simultaneous			43	0.052	simultaneous
	44	0.090037	heat			44	0.0176667	heat
	44	0.040963	light			44	0.053037	light
	44	0.0736667	simultaneous			44	0.046	simultaneous
	45	0.000444444	heat			45	0.00037037	heat
	45	0.0118519	light			45	0.0373333	light
	45	0.0206667	simultaneous			45	0.0427778	simultaneous
	46	0.275	heat			46	0.167481	heat
	46	0.105889	light			46	0.27663	light
	46	0.227407	simultaneous			46	0.206852	simultaneous
	47	0	heat			47	0.00274074	heat
	47	0.00577778	light			47	0.0509259	light
	47	0.0305556	simultaneous			47	0.014	simultaneous
	48	0.00285185	heat			48	0.00251852	heat
	48	0.0526667	light			48	0.0161111	light
	48	0.229778	simultaneous			48	0.183481	simultaneous
	49	0.144222	heat			49	0.106074	heat
	49	0.145519	light			49	0.0824815	light
	49	0.124481	simultaneous			49	0.0862963	simultaneous
	50	0.0121481	heat			50	0.0332593	heat
	50	0.0189259	light			50	0.0358889	light
	50	0.218704	simultaneous			50	0.0774074	simultaneous
	51	0.0575926	heat			51	0.00625926	heat
	51	0.0528519	light			51	0.0732963	light
	51	0.025963	simultaneous			51	0.0101111	simultaneous
	52	0.00377778	heat			52	0.023	heat
	52	0.058037	light			52	0.123259	light
	52	0.0295926	simultaneous			52	0.00588889	simultaneous
	53	0.0328889	heat			53	0.0351852	heat
	53	0.0249259	light			53	0.0945185	light
	53	0.0492963	simultaneous			53	0.0544074	simultaneous
	54	0.0130741	heat			54	0.00966667	heat
	54	0.0761111	light			54	0.143519	light
	54	0.102037	simultaneous			54	0.058963	simultaneous
	55	0.213185	heat			55	0.18637	heat
	55	0.15537	light			55	0.207222	light
	55	0.180778	simultaneous			55	0.220111	simultaneous
	56	0.00388889	heat			56	0.0554815	heat
	56	0.0100741	light			56	0.0155556	light
	56	0.0107407	simultaneous			56	0.0377778	simultaneous
	57	0.0963333	heat			57	0.0901852	heat
	57	0.0368519	light			57	0.0627778	light
	57	0.148889	simultaneous			57	0.10763	simultaneous
	58	0.0427778	heat			58	0.00762963	heat
	58	0.0458889	light			58	0.0788148	light
	58	0.0311852	simultaneous			58	0.0126296	simultaneous
	59	0.0757407	heat			59	0.0206296	heat
	59	0.00285185	light			59	0.0133333	light
	59	0.0253704	simultaneous			59	0.0655185	simultaneous
	60	0.170815	heat			60	0.35263	heat
	60	0.0498889	light			60	0.141926	light
	60	0.0643704	simultaneous			60	0.191704	simultaneous
	61	0.0552222	heat			61	0.069037	heat
	61	0.0335926	light			61	0.177111	light
	61	0.0485185	simultaneous			61	0.147556	simultaneous
	62	0.0205185	heat			62	0.026963	heat
	62	0.000407407	light			62	0.0712593	light
	62	0.0385926	simultaneous			62	0.0711481	simultaneous
	63	0.00148148	heat			63	0.0255926	heat
	63	0.0587407	light			63	0.0325556	light
	63	0.00551852	simultaneous			63	0.0142963	simultaneous
	64	0.0232963	heat			64	0.0256296	heat
	64	0.005	light			64	0.00718519	light
	64	0.0113333	simultaneous			64	0.00122222	simultaneous
	65	0.087	heat			65	0.0648148	heat
	65	0.00822222	light			65	0.188926	light
	65	0.0646296	simultaneous			65	0.131519	simultaneous
	66	0.0122222	heat			66	0.0221481	heat
	66	0.101852	light			66	0.0949259	light
	66	0.113667	simultaneous			66	0.0745185	simultaneous
	67	0.028	heat			67	0.0112963	heat
	67	0.000333333	light			67	0.00381481	light
	67	0.0501111	simultaneous			67	0.0479259	simultaneous
	68	0	heat			68	0	heat
	68	0.0258148	light			68	0.005	light
	68	0	simultaneous			68	0.00085185	simultaneous

## Sheet: Figure 2M
Figure 2M
	fly2	walk3	probe5
STI	0	40.7407	106.622
GLA	0	48.6091	9.85527
Gr4	83.6717	23.3322	9.92449

[truncated: 6 more sheets: Figure 2 FS1B, Figure 2 FS1D, Figure 2 FS2D, Figure 2 FS2E, Figure 2 FS2F, Statistics]
