# Supplementary material for: A persistent behavioral state enables sustained predation of humans by mosquitoes
Source: eLife. 2022 May 12;11:e76663. doi: 10.7554/eLife.76663 (PMC9154740; doi:10.7554/eLife.76663)
Supplement: Figure 3—source data 1. [file elife-76663-fig3-data1.xlsx]

## Sheet: Figure 3A
Figure 3A
Heat
time	-120	-114.975	-109.951	-104.926	-99.9015	-94.8768	-89.8522	-84.8276	-79.803	-74.7783	-69.7537	-64.7291	-59.7044	-54.6798	-49.6552	-44.6305	-39.6059	-34.5813	-29.5567	-24.532	-19.5074	-14.4828	-9.45813	-4.4335	0.591133	5.61576	10.6404	15.665	20.6897	25.7143	30.7389	35.7635	40.7882	45.8128	50.8374	55.8621	60.8867	65.9113	70.936	75.9606	80.9852	86.0099	91.0345	96.0591	101.084	106.108	111.133	116.158	121.182
walk3	0.0227891	0.0302494	0.0178458	0.025034	0.0212245	0.0141043	0.0140816	0.017619	0.0153741	0.0152381	0.0165079	0.0127438	0.00804989	0.0130385	0.0193424	0.0160544	0.0191156	0.0164626	0.0121995	0.024195	0.0183447	0.0221995	0.0200454	0.0449887	0.204036	0.214671	0.239615	0.23966	0.194898	0.187574	0.187959	0.201451	0.166327	0.169887	0.161746	0.196576	0.176236	0.157256	0.154331	0.134898	0.123878	0.142676	0.153764	0.13263	0.129002	0.150998	0.152812	0.123107	0.138027
probe5	0.0189569	0.0167347	0.0185941	0.0153288	0.0134467	0.0131519	0.0131293	0.0158277	0.0114966	0.0109977	0.0109751	0.0191383	0.0184354	0.0173016	0.0135147	0.0145805	0.022585	0.0225397	0.0157596	0.0143764	0.0190249	0.0244444	0.0234467	0.0282766	0.227256	0.324989	0.208912	0.154014	0.11737	0.118594	0.108186	0.104059	0.0803855	0.0721995	0.0773016	0.0811338	0.085805	0.0700454	0.0628798	0.0470748	0.0435828	0.0599773	0.0585488	0.0531293	0.0474376	0.0594558	0.0529705	0.0533107	0.0519501
fly2	0.00269841	0.000113379	0.000385488	0.000136054	0.00138322	0.00142857	0	0	0.000544218	0	0.000657596	4.53515e-05	0.000204082	0.00206349	0.000226757	0.000975057	0.000453515	0.001678	0.000793651	0.000204082	0.000839002	0	0.000748299	0.00106576	0.0134694	0.0124943	0.00732426	0.00362812	0.00238095	0.0075737	0.00390023	0.00399093	0.00303855	0.00326531	0.00546485	0.00294785	0.00743764	0.00492063	0.00451247	0.00451247	0.00303855	0.00376417	0.00129252	0.0045805	0.00687075	0.00555556	0.00331066	0.00287982	0.0039229
Light
time	-120	-114.975	-109.951	-104.926	-99.9015	-94.8768	-89.8522	-84.8276	-79.803	-74.7783	-69.7537	-64.7291	-59.7044	-54.6798	-49.6552	-44.6305	-39.6059	-34.5813	-29.5567	-24.532	-19.5074	-14.4828	-9.45813	-4.4335	0.591133	5.61576	10.6404	15.665	20.6897	25.7143	30.7389	35.7635	40.7882	45.8128	50.8374	55.8621	60.8867	65.9113	70.936	75.9606	80.9852	86.0099	91.0345	96.0591	101.084	106.108	111.133	116.158	121.182
walk3	0.0180045	0.0136735	0.0194331	0.0236961	0.0127211	0.0130839	0.0103855	0.0114059	0.0134467	0.0157596	0.0126757	0.0114286	0.00707483	0.0148299	0.00827664	0.00437642	0.0145125	0.00997732	0.0131746	0.0154875	0.0127438	0.0110658	0.0115193	0.0149887	0.0978005	0.191837	0.20966	0.191995	0.194694	0.229297	0.241905	0.224059	0.23619	0.243991	0.2461	0.271224	0.270227	0.281474	0.266893	0.303061	0.304354	0.305215	0.290522	0.319252	0.291088	0.286961	0.276032	0.294195	0.276621
probe5	0.0137415	0.0108617	0.0184127	0.0225624	0.0172109	0.0141043	0.0156236	0.0122449	0.0133787	0.0201361	0.0126984	0.0124943	0.00947846	0.0179592	0.0192063	0.015034	0.0132653	0.0147846	0.0130612	0.014966	0.0113379	0.0155782	0.0143991	0.0209524	0.0504535	0.104762	0.128503	0.124444	0.12068	0.1439	0.134399	0.135918	0.130612	0.131111	0.134626	0.138594	0.132653	0.146032	0.118231	0.151247	0.141497	0.135737	0.135964	0.127166	0.128594	0.124036	0.125578	0.133628	0.141406
fly2	0.000634921	0.00192744	0	0.00147392	0.00133787	0.000204082	0.00229025	6.80272e-05	2.26757e-05	0.00188209	0.00260771	0.000861678	0.000975057	0.000249433	0	0.000612245	0.000521542	0.000884354	0.000725624	0.000136054	0.000272109	0.000566893	0.000589569	0.000362812	0.106213	0.0159864	0.013356	0.0141043	0.0061678	0.0104308	0.00979592	0.00929705	0.00689342	0.0127211	0.0119728	0.00975057	0.0122902	0.00800454	0.00662132	0.0121769	0.0069161	0.00952381	0.00836735	0.0099093	0.00839002	0.0129025	0.00902494	0.0101361	0.0110658
Heat + Light
time	-120	-114.975	-109.951	-104.926	-99.9015	-94.8768	-89.8522	-84.8276	-79.803	-74.7783	-69.7537	-64.7291	-59.7044	-54.6798	-49.6552	-44.6305	-39.6059	-34.5813	-29.5567	-24.532	-19.5074	-14.4828	-9.45813	-4.4335	0.591133	5.61576	10.6404	15.665	20.6897	25.7143	30.7389	35.7635	40.7882	45.8128	50.8374	55.8621	60.8867	65.9113	70.936	75.9606	80.9852	86.0099	91.0345	96.0591	101.084	106.108	111.133	116.158	121.182
walk3	0.0263492	0.0212698	0.0203855	0.0209297	0.0239909	0.0233107	0.020068	0.0215193	0.0252381	0.0243537	0.0288435	0.0318141	0.0292971	0.0332426	0.0213832	0.0198413	0.0179592	0.00668934	0.00498866	0.0143311	0.0143311	0.0148073	0.012449	0.0284807	0.196236	0.3139	0.413424	0.431565	0.390658	0.388186	0.376054	0.363764	0.365465	0.351043	0.350045	0.358934	0.365306	0.373469	0.36263	0.324535	0.354444	0.345329	0.358889	0.336644	0.353469	0.368458	0.347778	0.317143	0.318027
probe5	0.0164399	0.0231519	0.0219501	0.0176417	0.0240816	0.0310658	0.0257596	0.0185261	0.0197052	0.0205669	0.0267347	0.0261678	0.0220181	0.0191383	0.0197959	0.0205442	0.0195918	0.023356	0.0163946	0.0147619	0.0154195	0.0161905	0.0129932	0.0181406	0.181406	0.369093	0.26161	0.21449	0.192517	0.180249	0.148776	0.132608	0.128753	0.127664	0.117755	0.126667	0.127007	0.1361	0.12322	0.124444	0.111973	0.115782	0.116984	0.119002	0.127392	0.122812	0.121338	0.114694	0.113152
fly2	0.000997732	0.000385488	0.000748299	0.000816327	0.00444444	0.00283447	0	0.00170068	0.00115646	9.07029e-05	6.80272e-05	0	0.000430839	0.000793651	0.000226757	0.000816327	0.000249433	0.000204082	0.00115646	0.00111111	0.000498866	0.000793651	0.00208617	0.00267574	0.0417234	0.0114739	0.023424	0.0160091	0.014263	0.00693878	0.00734694	0.0125624	0.00977324	0.0102494	0.0121542	0.00739229	0.0123583	0.00975057	0.00671202	0.0115193	0.0119955	0.0109524	0.0141723	0.00963719	0.0109297	0.0154195	0.0126984	0.009161	0.0121315
[truncated: 155 more columns]

## Sheet: Figure 3B
Figure 3B
Heat
time	-120	-114.975	-109.951	-104.926	-99.9015	-94.8768	-89.8522	-84.8276	-79.803	-74.7783	-69.7537	-64.7291	-59.7044	-54.6798	-49.6552	-44.6305	-39.6059	-34.5813	-29.5567	-24.532	-19.5074	-14.4828	-9.45813	-4.4335	0.591133	5.61576	10.6404	15.665	20.6897	25.7143	30.7389	35.7635	40.7882	45.8128	50.8374	55.8621	60.8867	65.9113	70.936	75.9606	80.9852	86.0099	91.0345	96.0591	101.084	106.108	111.133	116.158	121.182
walk3	0.020907	0.0185941	0.0247392	0.0204535	0.0171882	0.0164399	0.0178231	0.0156009	0.0161224	0.0236735	0.0295692	0.029932	0.0353968	0.0227438	0.0270295	0.0221542	0.0164853	0.0122676	0.0153968	0.0212698	0.024966	0.0204082	0.0188662	0.0365533	0.120181	0.0762812	0.0482993	0.0417234	0.0341043	0.0324263	0.0328798	0.0349206	0.0411338	0.024966	0.0222449	0.0321088	0.0296599	0.0226304	0.0237868	0.0251927	0.024966	0.0243991	0.0218141	0.0153741	0.0160544	0.030068	0.034195	0.0302948	0.0251474
probe5	0.0115873	0.0127891	0.0158957	0.0188889	0.0186395	0.0138322	0.0160771	0.0190249	0.0146259	0.0188209	0.0126077	0.0257143	0.0128345	0.010771	0.00911565	0.00981859	0.00619048	0.00761905	0.0160544	0.00888889	0.00975057	0.0127664	0.0110658	0.0190703	0.0875057	0.0626984	0.0239002	0.0188889	0.0109524	0.0143084	0.0130159	0.0152154	0.0131973	0.0130839	0.00786848	0.0101587	0.00993197	0.00884354	0.00947846	0.0107256	0.00875283	0.00995465	0.00854875	0.00675737	0.0037415	0.0109977	0.00866213	0.0209524	0.0171429
fly2	0.00108844	0.000544218	0.00324263	0.00163265	0.00179138	0.00163265	0.00446712	0.00154195	0.000408163	0.00371882	0.00031746	0.00278912	0.00204082	0.00460317	0	0.00249433	0.00489796	0.00031746	0.00190476	0.000884354	0.0023356	0.000907029	0.00183673	0.00739229	0.0200907	0.00605442	0.00292517	0.00102041	0.000680272	0.00321995	0.00591837	0.0046712	0.00376417	0.00115646	0.00147392	0.000839002	0.00575964	0.00306122	0.00160998	0.00333333	0.00369615	0.00276644	0.00349206	0.00190476	0.00247166	0.00290249	0.00376417	0.00197279	0.00181406
Light
time	-120	-114.975	-109.951	-104.926	-99.9015	-94.8768	-89.8522	-84.8276	-79.803	-74.7783	-69.7537	-64.7291	-59.7044	-54.6798	-49.6552	-44.6305	-39.6059	-34.5813	-29.5567	-24.532	-19.5074	-14.4828	-9.45813	-4.4335	0.591133	5.61576	10.6404	15.665	20.6897	25.7143	30.7389	35.7635	40.7882	45.8128	50.8374	55.8621	60.8867	65.9113	70.936	75.9606	80.9852	86.0099	91.0345	96.0591	101.084	106.108	111.133	116.158	121.182
walk3	0.0188889	0.0154649	0.0204308	0.0226531	0.0272109	0.0280045	0.0204308	0.0189116	0.0231519	0.020907	0.0120181	0.00959184	0.0148753	0.0176191	0.0148526	0.0230159	0.0250567	0.0162358	0.0211791	0.0163719	0.0168254	0.0160544	0.0240136	0.0220408	0.0323129	0.0402041	0.0425624	0.0402721	0.0334921	0.0284127	0.029229	0.040839	0.0447846	0.0428571	0.0457143	0.0419728	0.0368481	0.0318367	0.0393197	0.0378912	0.0324717	0.0262812	0.036644	0.0445352	0.0460544	0.0520408	0.0449887	0.0456236	0.0373469
probe5	0.0144898	0.0144671	0.0141043	0.0157596	0.0133107	0.0172562	0.0092517	0.0153515	0.0174376	0.0164626	0.0104082	0.0166893	0.0165533	0.0144898	0.0154422	0.0146032	0.015737	0.0130159	0.00922902	0.00888889	0.0131293	0.0053288	0.0148073	0.0148299	0.0204082	0.023288	0.035805	0.0272109	0.0254195	0.0202041	0.0245578	0.0295918	0.0343084	0.0361225	0.022517	0.0230612	0.0247392	0.0209977	0.0200453	0.0139909	0.0119728	0.015941	0.0221088	0.020771	0.0154422	0.0243991	0.0199773	0.0268707	0.0246259
fly2	0.00077098	0.0029932	0.00260771	0.00469388	0.00058957	0.00353741	0.00278912	0.00124717	0.00251701	0.001678	0.00272109	0.00022676	0.00156463	0.00108844	0.00306122	0.0022449	0.00045351	0.00238095	0.00133787	0.0014966	0.00208617	0.00056689	0.00174603	0.00369615	0.0270748	0.00854875	0.00349206	0.00015873	0.00274376	0.00356009	0.00324263	0.00154195	0.0014059	0.00086168	0.00521542	0.00181406	0.00424036	0.00408163	0.00328798	0.0021542	0.00260771	0.00310658	0.00170068	0.00274376	0.00106576	0.00090703	0.00378685	0.00229025	0.00326531
Heat + Light
time	-120	-114.975	-109.951	-104.926	-99.9015	-94.8768	-89.8522	-84.8276	-79.803	-74.7783	-69.7537	-64.7291	-59.7044	-54.6798	-49.6552	-44.6305	-39.6059	-34.5813	-29.5567	-24.532	-19.5074	-14.4828	-9.45813	-4.4335	0.591133	5.61576	10.6404	15.665	20.6897	25.7143	30.7389	35.7635	40.7882	45.8128	50.8374	55.8621	60.8867	65.9113	70.936	75.9606	80.9852	86.0099	91.0345	96.0591	101.084	106.108	111.133	116.158	121.182
walk3	0.0247166	0.0230159	0.0247166	0.0241723	0.0172336	0.0225397	0.0231066	0.0305669	0.0317234	0.0302041	0.0336508	0.0294785	0.0209977	0.0199093	0.0248753	0.0253515	0.0173016	0.0146939	0.0159637	0.019093	0.0257596	0.0225397	0.0273696	0.0460317	0.0804082	0.0917234	0.0759637	0.0707937	0.044195	0.0551701	0.0544218	0.0519274	0.0437415	0.0519274	0.0506349	0.0510658	0.0471655	0.0436054	0.0472789	0.0487528	0.0354422	0.046576	0.0486621	0.0433107	0.0537415	0.0534467	0.0445125	0.0495011	0.0427438
probe5	0.0069161	0.0201361	0.0175057	0.0169161	0.0111338	0.0153288	0.0175737	0.0166893	0.0171655	0.017483	0.0103855	0.0119274	0.0143084	0.0185261	0.0152608	0.0143991	0.0104535	0.0112245	0.010771	0.0138095	0.0187528	0.0217687	0.0139683	0.0161905	0.0662585	0.0719274	0.0348299	0.024059	0.0189569	0.0128345	0.0211111	0.0122902	0.015941	0.0186848	0.0231066	0.0189116	0.0187075	0.0197506	0.0154649	0.0188435	0.0211565	0.016644	0.0178912	0.0133787	0.0100454	0.0183673	0.0163946	0.0180726	0.0161678
fly2	0.00165533	0.00111111	0.00290249	6.80272e-05	0.00292517	0.0015873	0.00145125	0.00201814	0.00410431	0.00208617	0.00120181	0.00269841	0.000997732	0.00444444	0.00179138	0.0055102	0.0024263	0.00297052	0.00412698	0.00503401	0.00290249	0.00342404	0.00115646	0.00582766	0.0330159	0.0183447	0.009161	0.00507937	0.0113379	0.00349206	0.00575964	0.00505669	0.00394558	0.00895692	0.00380952	0.00122449	0.00510204	0.00256236	0.00612245	0.00482993	0.00718821	0.00684807	0.00818594	0.00623583	0.00548753	0.00471655	0.00659864	0.00489796	0.00802721
[truncated: 155 more columns]

## Sheet: Figure 3C
Figure 3C
Heat
time	-120	-114.975	-109.951	-104.926	-99.9015	-94.8768	-89.8522	-84.8276	-79.803	-74.7783	-69.7537	-64.7291	-59.7044	-54.6798	-49.6552	-44.6305	-39.6059	-34.5813	-29.5567	-24.532	-19.5074	-14.4828	-9.45813	-4.4335	0.591133	5.61576	10.6404	15.665	20.6897	25.7143	30.7389	35.7635	40.7882	45.8128	50.8374	55.8621	60.8867	65.9113	70.936	75.9606	80.9852	86.0099	91.0345	96.0591	101.084	106.108	111.133	116.158	121.182
walk3	0.00566893	0.00519274	0.00634921	0.00678005	0.00557823	0.00390023	0.00287982	0.00421769	0.00526077	0.00739229	0.00582766	0.00562358	0.0078458	0.00739229	0.00655329	0.00575964	0.00444444	0.00485261	0.00727891	0.00632653	0.00646259	0.00562358	0.00664399	0.0124943	0.0554422	0.0627438	0.0434694	0.0320408	0.0230159	0.0175057	0.0189342	0.0134467	0.014195	0.01161	0.0152381	0.0204308	0.0214739	0.0209751	0.0092517	0.00328798	0.00453515	0.0031746	0.00993197	0.00684807	0.00514739	0.00684807	0.00446712	0.00365079	0.00519274
probemale	0.009161	0.0126077	0.00891156	0.00802721	0.0120181	0.00653061	0.00970522	0.00791383	0.00897959	0.0112925	0.00854875	0.0093424	0.0130385	0.0124263	0.00845805	0.00959184	0.00594104	0.00612245	0.010907	0.00621315	0.00941043	0.00721088	0.0069161	0.00988662	0.0267347	0.0472562	0.0249206	0.0190023	0.0131066	0.0145578	0.0126531	0.0119048	0.0127891	0.00891156	0.0155102	0.0203628	0.013424	0.0166213	0.0119274	0.00503401	0.00655329	0.0052381	0.0119955	0.00811791	0.0124717	0.00791383	0.00705215	0.00823129	0.0075737
fly2	0	0	0	0	0	0	0	0.000997732	0.00145125	0	0.000861678	2.26757e-05	0.000204082	2.26757e-05	0.00015873	0.000136054	0.000362812	0.000226757	0.000408163	0.00106576	0.000204082	0	0	0.000839002	0.00630385	0.00371882	0.00315193	0.000907029	0.000181406	0.000430839	0.00015873	0	0	0.00047619	0.000181406	0	0	0	0.000249433	0.000113379	0.000453515	4.53515e-05	0.000566893	0	0	0.000181406	6.80272e-05	0.000226757	0.000136054
Light
time	-120	-114.975	-109.951	-104.926	-99.9015	-94.8768	-89.8522	-84.8276	-79.803	-74.7783	-69.7537	-64.7291	-59.7044	-54.6798	-49.6552	-44.6305	-39.6059	-34.5813	-29.5567	-24.532	-19.5074	-14.4828	-9.45813	-4.4335	0.591133	5.61576	10.6404	15.665	20.6897	25.7143	30.7389	35.7635	40.7882	45.8128	50.8374	55.8621	60.8867	65.9113	70.936	75.9606	80.9852	86.0099	91.0345	96.0591	101.084	106.108	111.133	116.158	121.182
walk3	0.00514739	0.00736961	0.00995465	0.00823129	0.0053288	0.0112698	0.00750567	0.00247166	0.00630385	0.01	0.00759637	0.00530612	0.00659864	0.00759637	0.0135374	0.00492063	0.0069161	0.00852608	0.0105215	0.0107256	0.00680272	0.00578231	0.00587302	0.0102948	0.0454875	0.181293	0.158571	0.0946712	0.0677778	0.0713152	0.0564399	0.0596599	0.054195	0.0551701	0.0513379	0.0447166	0.0467347	0.0412018	0.0421995	0.0481859	0.0391156	0.0327438	0.0363039	0.03161	0.035941	0.0305669	0.0245125	0.0334014	0.0310431
probemale	0.00446712	0.00666667	0.0104762	0.00650794	0.00528345	0.00750567	0.0047619	0.00424036	0.00600907	0.00424036	0.00829932	0.00623583	0.00462585	0.00714286	0.00716553	0.0039229	0.00727891	0.00349206	0.00825397	0.00480726	0.00294785	0.00494331	0.00712018	0.00589569	0.0136961	0.0769388	0.0804082	0.0583673	0.0324943	0.0353968	0.0352608	0.0295238	0.0247846	0.0229705	0.0268254	0.0228798	0.0202948	0.0268027	0.0231519	0.0294104	0.023424	0.0288435	0.0129932	0.00943311	0.017551	0.014966	0.0172562	0.0174603	0.0124717
fly2	0.000249433	0.000589569	0.0015873	0.000725624	0.000136054	0	0	0	0.000997732	0	0.000113379	0.000249433	0.001678	0.000544218	0.000498866	0.000113379	0	0.000113379	0.000929705	6.80272e-05	0.000136054	0	0.00188209	0.000113379	0.152971	0.0347392	0.0030839	0.00353741	0.00344671	0.0031746	0.00276644	0.00276644	0.00333333	0.00260771	0.00274376	0.00106576	0.00319728	0.00287982	0.0061678	0.00145125	0.000453515	0.00360544	0	0.00126984	0.00111111	0.000725624	0.000385488	0.00206349	0.00151927
Heat + Light
time	-120	-114.975	-109.951	-104.926	-99.9015	-94.8768	-89.8522	-84.8276	-79.803	-74.7783	-69.7537	-64.7291	-59.7044	-54.6798	-49.6552	-44.6305	-39.6059	-34.5813	-29.5567	-24.532	-19.5074	-14.4828	-9.45813	-4.4335	0.591133	5.61576	10.6404	15.665	20.6897	25.7143	30.7389	35.7635	40.7882	45.8128	50.8374	55.8621	60.8867	65.9113	70.936	75.9606	80.9852	86.0099	91.0345	96.0591	101.084	106.108	111.133	116.158	121.182
walk3	0.00256236	0.00793651	0.00365079	0.00165533	0.00213152	0.0015873	0.00306122	0.00115646	0.00213152	0.00433107	0.00362812	0.00283447	0.00349206	0.00208617	0.00106576	0.00421769	0.00151927	0.00628118	0.0130612	0.00875283	0.00984127	0.0111338	0.00825397	0.00482993	0.0357823	0.165692	0.138231	0.073424	0.0731066	0.0741723	0.0590476	0.0553288	0.0412018	0.044898	0.0447166	0.0460317	0.0472562	0.0363719	0.0277098	0.0228118	0.0283447	0.0305896	0.032517	0.0346939	0.0310884	0.0248526	0.0212925	0.0238095	0.0294104
probemale	0.0047619	0.00643991	0.00378685	0.00419501	0.00439909	0.00444444	0.00326531	0.00172336	0.00678005	0.00498866	0.00378685	0.00197279	0.0047619	0.00548753	0.00539683	0.00412698	0.00666667	0.00759637	0.00761905	0.00630385	0.00911565	0.00643991	0.00696145	0.00650794	0.0123583	0.0696825	0.0584127	0.030771	0.037551	0.032381	0.0331066	0.0297506	0.026644	0.0236054	0.0211565	0.0186621	0.0185714	0.016644	0.0181406	0.00941043	0.00952381	0.0168481	0.0173243	0.0139002	0.0173696	0.010771	0.0112245	0.014966	0.0132653
fly2	0.00136054	0.000136054	0	0	0	0	0.000544218	0.00176871	0.000181406	0	0	0	0.00047619	0	0	0	0.00160998	0.000521542	0.000113379	0.000113379	0.000793651	0.00015873	0	0.000453515	0.120522	0.0339229	0.00464853	0.00464853	0.00437642	0.00489796	0.000113379	0.00401361	0.0030839	0.0047619	0.0030839	0.000340136	0.00399093	0.0030839	0.000907029	0.00102041	0	0.000952381	0.00376417	4.53515e-05	0.00185941	0.000861678	0.00399093	0.00426304	6.80272e-05
[truncated: 155 more columns]

## Sheet: Figure 3D
Figure 3D
Heat	behavior_prop	stimulus		Light	behavior_prop	stimulus		Heat + Light	behavior_prop	stimulus
	0.0185556	heat_SF			0.105407	light_SF			0.104889	comb_SF
	0	heat_G			0	light_G			0	comb_G
	0.00140741	heat_M			0.0575926	light_M			0.0353704	comb_M
	0.019037	heat_SF			0.350333	light_SF			0.511852	comb_SF
	0.00737037	heat_G			0	light_G			0.000185185	comb_G
	0	heat_M			0.0464074	light_M			0.00396296	comb_M
	0.00685185	heat_SF			0.277741	light_SF			0.274296	comb_SF
	0.000888889	heat_G			0	light_G			0.00144444	comb_G
	0.000259259	heat_M			0.0145926	light_M			0.00814815	comb_M
	0.138444	heat_SF			0.146444	light_SF			0.0507037	comb_SF
	0.0378519	heat_G			0.0766667	light_G			0.0206667	comb_G
	0.000185185	heat_M			0.278444	light_M			0.0380741	comb_M
	0.131963	heat_SF			0.341	light_SF			0.198111	comb_SF
	0	heat_G			0.106889	light_G			0.094963	comb_G
	0.00781481	heat_M			0.284815	light_M			0.113333	comb_M
	0.005	heat_SF			0.193852	light_SF			0.404593	comb_SF
	0.0194815	heat_G			0.00533333	light_G			0	comb_G
	0.0650741	heat_M			0.0484815	light_M			0.0644444	comb_M
	0.00751852	heat_SF			0.278778	light_SF			0.155259	comb_SF
	0.00162963	heat_G			0.0189259	light_G			0.101889	comb_G
	0.0242593	heat_M			0.130333	light_M			0.0518889	comb_M
	0.00818519	heat_SF			0	light_SF			0.0492593	comb_SF
	0	heat_G			0.000666667	light_G			0	comb_G
	0.00722222	heat_M			0.0781481	light_M			0.0467037	comb_M
	0.122926	heat_SF			0.369444	light_SF			0.279444	comb_SF
	0	heat_G			0	light_G			0	comb_G
	0.0483333	heat_M			0.103889	light_M			0.114333	comb_M
	0.0115185	heat_SF			0.432926	light_SF			0.322296	comb_SF
	0.0148519	heat_G			0.008	light_G			0.17163	comb_G
	0.0265926	heat_M			0.096	light_M			0.0411111	comb_M
	0.0721481	heat_SF			0.498667	light_SF			0.422185	comb_SF
	0.00859259	heat_G			0.00122222	light_G			0.0571852	comb_G
	0.00451852	heat_M			0.0656667	light_M			0.0691111	comb_M
	0.00362963	heat_SF			0.209259	light_SF			0.0417037	comb_SF
	0.010037	heat_G			0.00440741	light_G			0.00651852	comb_G
	0	heat_M			0.055037	light_M			0.063037	comb_M
	0.0631111	heat_SF			0.0575926	light_SF			0.0855556	comb_SF
	0.000925926	heat_G			0.000185185	light_G			0	comb_G
	0	heat_M			0.00759259	light_M			0.00133333	comb_M
	0.00325926	heat_SF			0.130704	light_SF			0.0825185	comb_SF
	0.0258148	heat_G			0.00722222	light_G			0.0535556	comb_G
	0.00125926	heat_M			0.0308519	light_M			0.0270741	comb_M
	0.127037	heat_SF			0.22463	light_SF			0.137444	comb_SF
	0.0627407	heat_G			0	light_G			0.0576667	comb_G
	0	heat_M			0.00388889	light_M			0.00474074	comb_M
	0.217	heat_SF			0.302593	light_SF			0.400148	comb_SF
	0.00911111	heat_G			0	light_G			0.0193704	comb_G
	0.000222222	heat_M			0.0114444	light_M			0	comb_M
	0.0342593	heat_SF			0.170889	light_SF			0.219296	comb_SF
	0.0174444	heat_G			0.034037	light_G			0.0167407	comb_G
	0.00762963	heat_M			0.0117778	light_M			0	comb_M
	0.190963	heat_SF			0.371296	light_SF			0.434778	comb_SF
	0.000481481	heat_G			0.00444444	light_G			0.00333333	comb_G
	0	heat_M			0.006	light_M			0.0126667	comb_M
	0.206407	heat_SF			0.288667	light_SF			0.383889	comb_SF
	0.0413333	heat_G			0.0791111	light_G			0.114185	comb_G
	0.00192593	heat_M			0.0108889	light_M			0.00518519	comb_M
	0.118704	heat_SF			0.347111	light_SF			0.272741	comb_SF
	0.0092963	heat_G			0.078963	light_G			0.0682963	comb_G
	0.0142222	heat_M			0.0134815	light_M			0.0524074	comb_M
	0.0984074	heat_SF			0.233593	light_SF			0.0333704	comb_SF
	0.25937	heat_G			0.0154444	light_G			0.0042963	comb_G
	0	heat_M			0.00166667	light_M			0.0201111	comb_M
	0.145333	heat_SF			0.401111	light_SF			0.251704	comb_SF
	0.0587778	heat_G			0.00251852	light_G			0.0615556	comb_G
	0.00140741	heat_M			0.011963	light_M			0.0645926	comb_M
	0.0291111	heat_SF			0.20237	light_SF			0.285593	comb_SF
	0.00566667	heat_G			0.0574074	light_G			0.104704	comb_G
	0.0202222	heat_M			0.00640741	light_M			0.0100741	comb_M
	0.233444	heat_SF			0.0454074	light_SF			0.412704	comb_SF
	0.0148519	heat_G			0.0768519	light_G			0.0528889	comb_G
	0	heat_M			0.0131111	light_M			0.00255556	comb_M
	0.330296	heat_SF			0.193222	light_SF			0.217074	comb_SF
	0	heat_G			0	light_G			0	comb_G
	0.00166667	heat_M			0.017037	light_M			0.0245556	comb_M
	0.0938148	heat_SF			0.31663	light_SF			0.368926	comb_SF
	0.0251852	heat_G			0.00566667	light_G			0.0368148	comb_G
	0.00062963	heat_M			0.0366667	light_M			0.00722222	comb_M
	0.155741	heat_SF			0.150148	light_SF			0.324815	comb_SF
	0	heat_G			0.015037	light_G			0.090037	comb_G
	0.00362963	heat_M			0.108889	light_M			0.0281481	comb_M
	0.273704	heat_SF			0.278704	light_SF			0.246667	comb_SF
	0.0303704	heat_G			0.00151852	light_G			0.00840741	comb_G
	0.00503704	heat_M			0.012037	light_M			0.024	comb_M
	0.16463	heat_SF			0.354556	light_SF			0.409148	comb_SF
	0.0550741	heat_G			0.0196296	light_G			0.0427037	comb_G
	0.0137037	heat_M			0.0202593	light_M			0.0602963	comb_M
	0.0352593	heat_SF			0.270407	light_SF			0.282407	comb_SF
	0.00114815	heat_G			0.000777778	light_G			0	comb_G
	0	heat_M			0	light_M			0.0146296	comb_M
	0.168481	heat_SF			0.317185	light_SF			0.249148	comb_SF
	0.00718519	heat_G			0.0812222	light_G			0.0077037	comb_G
	0.00111111	heat_M			0	light_M			0.0317037	comb_M
	0	heat_SF			0.117296	light_SF			0.143667	comb_SF
	0	heat_G			0.005	light_G			0	comb_G
	0.00181481	heat_M			0.00181481	light_M			0	comb_M
	0.222667	heat_SF			0.468	light_SF			0.606704	comb_SF
	0.00203704	heat_G			0.00885185	light_G			0.0155185	comb_G
	0.0155926	heat_M			0.0235926	light_M			0.0678889	comb_M
	0.0337407	heat_SF			0.115778	light_SF			0.0683333	comb_SF
	0	heat_G			0	light_G			0.019963	comb_G
	0	heat_M			0.00822222	light_M			0.00985185	comb_M
	0.0168519	heat_SF			0.296111	light_SF			0.495778	comb_SF
	0	heat_G			0.0092963	light_G			0	comb_G
	0.00818519	heat_M			0.0700741	light_M			0.0948519	comb_M
	0.290333	heat_SF			0.638926	light_SF			0.650444	comb_SF
	0.0105926	heat_G			0.100889	light_G			0.00618519	comb_G
	0.0286296	heat_M			0.0323704	light_M			0.0256667	comb_M
	0.134481	heat_SF			0.440926	light_SF			0.734185	comb_SF
	0.012037	heat_G			0.067	light_G			0.0802593	comb_G
	0.00966667	heat_M			0.0268148	light_M			0.0187037	comb_M
	0.316556	heat_SF			0.125481	light_SF			0.301407	comb_SF
	0.00811111	heat_G			0.005	light_G			0.0707407	comb_G
	0.00548148	heat_M			0.0363704	light_M			0.096963	comb_M
	0.0658889	heat_SF			0.00792593	light_SF			0.0109259	comb_SF
	0	heat_G			0	light_G			0	comb_G
	0.00918519	heat_M			0.0247037	light_M			0.0347037	comb_M
	0.0715185	heat_SF			0.126037	light_SF			0.164111	comb_SF
	0.000962963	heat_G			0.000222222	light_G			0	comb_G
	0.00144444	heat_M			0.0104444	light_M			0.0394444	comb_M
	0.127222	heat_SF			0.240481	light_SF			0.517222	comb_SF
	0.00118519	heat_G			0.00648148	light_G			0.0224815	comb_G
	0.0294815	heat_M			0.104037	light_M			0.0490741	comb_M
	0.257963	heat_SF			0.279519	light_SF			0.433741	comb_SF
	0	heat_G			0.0258519	light_G			0.032	comb_G
	0.00533333	heat_M			0.00533333	light_M			0.0125926	comb_M
	0.179815	heat_SF			0.236	light_SF			0.49163	comb_SF
	0.0447778	heat_G			0.000185185	light_G			0.158296	comb_G
	0	heat_M			0.018963	light_M			0.00192593	comb_M
	0.0693333	heat_SF			0.136852	light_SF			0.172519	comb_SF
	0.075	heat_G			0.0348889	light_G			0.052037	comb_G
	0.00111111	heat_M			0.00751852	light_M			0.0017037	comb_M
	0.0017037	heat_SF			0.036	light_SF			0.25337	comb_SF
	0.0211481	heat_G			0.0273333	light_G			0.109704	comb_G
	0	heat_M			0.0268519	light_M			0.0172963	comb_M
	0.00974074	heat_SF			0.127037	light_SF			0.0737037	comb_SF
	0.00762963	heat_G			0.0784074	light_G			0.049963	comb_G
	0.016	heat_M			0.013	light_M			0.0124815	comb_M
	0.00611111	heat_SF			0.0368519	light_SF			0.140815	comb_SF
	0.00877778	heat_G			0.0442222	light_G			0.101963	comb_G
	0.00362963	heat_M			0.0363704	light_M			0.0285185	comb_M
	0.00285185	heat_SF			0.085	light_SF			0.0755926	comb_SF
	0.023	heat_G			0.00462963	light_G			0.0915556	comb_G
	0.0296667	heat_M			0.0355926	light_M			0.0580741	comb_M
	0.145222	heat_SF			0.221667	light_SF			0.205852	comb_SF
	0.00818519	heat_G			0.0626296	light_G			0.0534074	comb_G
	0.000592593	heat_M			0.00577778	light_M			0	comb_M
	0.166963	heat_SF			0.208889	light_SF			0.342	comb_SF
	0.0113333	heat_G			0.0388148	light_G			0.00992593	comb_G
	0.00551852	heat_M			0	light_M			0.0163333	comb_M
	0.158963	heat_SF			0.198259	light_SF			0.386148	comb_SF
	0.0882593	heat_G			0	light_G			0.00374074	comb_G
	0.000925926	heat_M			0.0236296	light_M			0.000333333	comb_M
	0.00396296	heat_SF			0.16437	light_SF			0.218556	comb_SF
	0.0185185	heat_G			0.0197778	light_G			0.0232593	comb_G
	0.00485185	heat_M			0.00244444	light_M			0	comb_M
	0.203333	heat_SF			0.293667	light_SF			0.432407	comb_SF
	0.103222	heat_G			0.467148	light_G			0.475444	comb_G
	0.000185185	heat_M			0.0136296	light_M			0.0166296	comb_M
	0.0576667	heat_SF			0.208481	light_SF			0.213111	comb_SF
	0	heat_G			0.0376667	light_G			0.021037	comb_G
	0.0395556	heat_M			0.0742593	light_M			0.0175556	comb_M
	0.0355926	heat_SF			0.0298519	light_SF			0.212778	comb_SF
	0.0801481	heat_G			0.140963	light_G			0.0873333	comb_G
	0	heat_M			0	light_M			0.0181852	comb_M
	0.165333	heat_SF			0.253222	light_SF			0.282111	comb_SF
	0.00111111	heat_G			0.0201481	light_G			0.00166667	comb_G
	0	heat_M			0.0340741	light_M			0.00522222	comb_M
	0.184963	heat_SF			0.375963	light_SF			0.320296	comb_SF
	0.0753333	heat_G			0.00240741	light_G			0.000222222	comb_G
	0	heat_M			0.0157778	light_M			0.0504444	comb_M
	0.139259	heat_SF			0.244333	light_SF			0.440259	comb_SF
	0.0104815	heat_G			0	light_G			0	comb_G
	0.000740741	heat_M			0.0172593	light_M			0.00940741	comb_M
	0.00148148	heat_SF			0.288222	light_SF			0.278111	comb_SF
	0.106037	heat_G			0.0133704	light_G			0	comb_G
	0.00933333	heat_M			0	light_M			0.00655556	comb_M
	0.117852	heat_SF			0.185222	light_SF			0.45337	comb_SF
	0.000555556	heat_G			0.0367037	light_G			0.0804444	comb_G
	0.00555556	heat_M			0	light_M			0.000296296	comb_M
	0.159704	heat_SF			0.342296	light_SF			0.481407	comb_SF
	0.0187037	heat_G			0.0380741	light_G			0.0504815	comb_G
	0	heat_M			0.0263333	light_M			0.0172963	comb_M
	0.0374815	heat_SF			0.137593	light_SF			0.191889	comb_SF
	0.00240741	heat_G			0.0712222	light_G			0.00144444	comb_G
	0.000222222	heat_M			0.000814815	light_M			0.000962963	comb_M
	0.350593	heat_SF			0.347852	light_SF			0.666667	comb_SF
	0.0724074	heat_G			0.0225556	light_G			0.0261111	comb_G
	0.008	heat_M			0.0448519	light_M			0.0858519	comb_M
	0.225333	heat_SF			0.383481	light_SF			0.472111	comb_SF
	0.000444444	heat_G			0.0311852	light_G			0.0436667	comb_G
	0.00114815	heat_M			0.000296296	light_M			0.0174815	comb_M
	0.219704	heat_SF			0.201481	light_SF			0.275296	comb_SF
	0.112556	heat_G			0.0949259	light_G			0.00907407	comb_G
	0.00137037	heat_M			0.0223333	light_M			0.0209259	comb_M
	0.27663	heat_SF			0.181333	light_SF			0.282667	comb_SF
	0.0137037	heat_G			0.0621111	light_G			0.0202963	comb_G
	0.00207407	heat_M			0.0101111	light_M			0.012037	comb_M
	0.295815	heat_SF			0.454259	light_SF			0.605704	comb_SF
	0.0252963	heat_G			0.0205926	light_G			0.0575185	comb_G
	0.00403704	heat_M			0.0151852	light_M			0.0230741	comb_M
	0.197	heat_SF			0.38237	light_SF			0.580926	comb_SF
	0.00407407	heat_G			0.0247037	light_G			0.0264815	comb_G
	0.0151111	heat_M			0.0235556	light_M			0.0118148	comb_M
	0.222519	heat_SF			0.455037	light_SF			0.256519	comb_SF
	0	heat_G			0.00133333	light_G			0	comb_G
	0	heat_M			0	light_M			0.0209259	comb_M
	0.153926	heat_SF			0.498444	light_SF			0.438741	comb_SF
	0.0672963	heat_G			0.0368519	light_G			0.00655556	comb_G
	0.00111111	heat_M			0.00925926	light_M			0	comb_M
	0.213296	heat_SF			0.156333	light_SF			0.166519	comb_SF
	0	heat_G			0.000888889	light_G			0.00462963	comb_G
	0	heat_M			0.00585185	light_M			0.0214074	comb_M
	0.183481	heat_SF			0.167444	light_SF			0.225037	comb_SF
	0.0212963	heat_G			0	light_G			0.00111111	comb_G
	0.00374074	heat_M			0.0350741	light_M			0.0504074	comb_M
	0.0874444	heat_SF			0.233111	light_SF			0.383	comb_SF
	0	heat_G			0.00111111	light_G			0.00414815	comb_G
	0.00255556	heat_M			0	light_M			0.0421481	comb_M
	0.0532222	heat_SF			0.229407	light_SF			0.352519	comb_SF
	0.0268148	heat_G			0.0102593	light_G			0.00285185	comb_G
	0.076	heat_M			0.0447407	light_M			0.0225926	comb_M
	0.0355926	heat_SF			0.238185	light_SF			0.167111	comb_SF
	0.0945185	heat_G			0.000333333	light_G			0.00448148	comb_G
	0.0107778	heat_M			0	light_M			0.0383704	comb_M
	0.216741	heat_SF			0.160667	light_SF			0.204407	comb_SF
	0.000259259	heat_G			0.000185185	light_G			0.00211111	comb_G
	0.0297407	heat_M			0.0311481	light_M			0.0237037	comb_M
	0.304	heat_SF			0.51237	light_SF			0.652704	comb_SF
	0.0165926	heat_G			0.0438148	light_G			0.00288889	comb_G
	0.00492593	heat_M			0	light_M			0.0595185	comb_M
	0.254037	heat_SF			0.264148	light_SF			0.442148	comb_SF
	0.000259259	heat_G			0	light_G			0	comb_G
	0.0404815	heat_M			0.0567778	light_M			0.0563704	comb_M
	0.0314815	heat_SF			0.349889	light_SF			0.316815	comb_SF
	0.00403704	heat_G			0	light_G			0.00103704	comb_G
	0.000222222	heat_M			0.0119259	light_M			0.0152593	comb_M
	0.218111	heat_SF			0.390556	light_SF			0.38763	comb_SF
	0.00659259	heat_G			0.00237037	light_G			0.00744444	comb_G
	0.0121481	heat_M			0.00144444	light_M			0.0116296	comb_M
	0.388148	heat_SF			0.421037	light_SF			0.661148	comb_SF
	0.00951852	heat_G			0.0032963	light_G			0.0151481	comb_G
	0.034037	heat_M			0.0904815	light_M			0.0308519	comb_M
	0.263259	heat_SF			0.466481	light_SF			0.751	comb_SF
	0	heat_G			0.0181852	light_G			0	comb_G
	0.203889	heat_M			0.196704	light_M			0.0732963	comb_M
	0.530556	heat_SF			0.550926	light_SF			0.31163	comb_SF
	0.234815	heat_G			0.103667	light_G			0.258259	comb_G
	0.000259259	heat_M			0.0107037	light_M			0	comb_M
	0	heat_SF			0.218	light_SF			0.461481	comb_SF
	0	heat_G			0	light_G			0	comb_G
	0.00959259	heat_M			0.021037	light_M			0.0198148	comb_M
	0.0221111	heat_SF			0.014037	light_SF			0.030037	comb_SF
	0.236259	heat_G			0.369778	light_G			0.438889	comb_G
	0.0473333	heat_M			0.00725926	light_M			0.0113704	comb_M
	0.018963	heat_SF			0.0820741	light_SF			0.0504815	comb_SF
	0.118259	heat_G			0.149778	light_G			0.271333	comb_G
	0.000481481	heat_M			0.013963	light_M			0.0156667	comb_M
	0.00174074	heat_SF			0.0768519	light_SF			0.113593	comb_SF
	0.00937037	heat_G			0.0644074	light_G			0.0946667	comb_G
	0.013963	heat_M			0.0240741	light_M			0.0103333	comb_M
	0.0481852	heat_SF			0	light_SF			0.0542593	comb_SF
	0.0711111	heat_G			0.0540741	light_G			0.126481	comb_G
	0.0194815	heat_M			0.00903704	light_M			0.0384444	comb_M
	0.0357037	heat_SF			0.248852	light_SF			0.186519	comb_SF
	0.0572593	heat_G			0.0758148	light_G			0.0758148	comb_G
	0.0155185	heat_M			0.0383333	light_M			0.0742963	comb_M
	0.025963	heat_SF			0.0777037	light_SF			0.0671481	comb_SF
	0.0377037	heat_G			0.0442593	light_G			0.0940741	comb_G
	0.0115185	heat_M			0.035963	light_M			0.0178889	comb_M
	0.105074	heat_SF			0.167296	light_SF			0.226481	comb_SF
	0.0202222	heat_G			0.00792593	light_G			0.0634074	comb_G
	0.000703704	heat_M			0.0101111	light_M			0.0505556	comb_M
	0.404963	heat_SF			0.605333	light_SF			0.58537	comb_SF
	0.123148	heat_G			0.0495926	light_G			0.136519	comb_G
	0.0334444	heat_M			0	light_M			0	comb_M
	0.176963	heat_SF			0.186	light_SF			0.270111	comb_SF
	0.0496667	heat_G			0.132889	light_G			0.0830741	comb_G
	0.00703704	heat_M			0.0117407	light_M			0.0409259	comb_M
	0.105852	heat_SF			0.221259	light_SF			0.307852	comb_SF
	0.023963	heat_G			0.075037	light_G			0.0643333	comb_G
	0.00196296	heat_M			0.0072963	light_M			0.00288889	comb_M
	0.0979259	heat_SF			0.486296	light_SF			0.455741	comb_SF
	0.093037	heat_G			0.0365926	light_G			0.0238889	comb_G
	0.00614815	heat_M			0.0655926	light_M			0.0563333	comb_M
	0.006	heat_SF			0.0454815	light_SF			0.085963	comb_SF
	0.0598519	heat_G			0	light_G			0.0133333	comb_G
	0.00466667	heat_M			0.000666667	light_M			0.000481481	comb_M
	0.0361481	heat_SF			0.0192963	light_SF			0.138185	comb_SF
	0.014037	heat_G			0.203704	light_G			0.257481	comb_G
	0.0012963	heat_M			0.00244444	light_M			0.0115556	comb_M
	0.101704	heat_SF			0.169963	light_SF			0.384889	comb_SF
	0.0611852	heat_G			0.119222	light_G			0.176407	comb_G
	0.00125926	heat_M			0.000592593	light_M			0.0185556	comb_M

## Sheet: Figure 3E
Figure 3E
Heat	behavior_prop	stimulus		Light	behavior_prop	stimulus		Heat + Light	behavior_prop	stimulus
	0.00911111	heat_SF			0.0548148	light_SF			0.0414815	comb_SF
	0	heat_G			0	light_G			0.0002963	comb_G
	0.00533333	heat_M			0.0237407	light_M			0.0198889	comb_M
	0.00359259	heat_SF			0.108444	light_SF			0.173333	comb_SF
	0.00692593	heat_G			0.0278148	light_G			0.00203704	comb_G
	0	heat_M			0.0182593	light_M			0	comb_M
	0.00951852	heat_SF			0.0827407	light_SF			0.0843704	comb_SF
	0.0263333	heat_G			0.0002963	light_G			0.00888889	comb_G
	0.00103704	heat_M			0.00685185	light_M			0.0047037	comb_M
	0.0545185	heat_SF			0.0215185	light_SF			0.0267778	comb_SF
	0.0286296	heat_G			0.0442963	light_G			0.008	comb_G
	0.00877778	heat_M			0.161519	light_M			0.0437778	comb_M
	0.202074	heat_SF			0.20237	light_SF			0.102815	comb_SF
	0	heat_G			0.00374074	light_G			0.00966667	comb_G
	0.0032963	heat_M			0.173407	light_M			0.0711852	comb_M
	0.0261481	heat_SF			0.102778	light_SF			0.203	comb_SF
	0	heat_G			0.00644444	light_G			0	comb_G
	0.0487037	heat_M			0.0144444	light_M			0.0346667	comb_M
	0.0111111	heat_SF			0.0443333	light_SF			0.0223704	comb_SF
	0.00311111	heat_G			0.0111111	light_G			0.044963	comb_G
	0.0128889	heat_M			0.0965556	light_M			0.0516667	comb_M
	0.0494815	heat_SF			0.00411111	light_SF			0.0235926	comb_SF
	0	heat_G			0	light_G			0	comb_G
	0.00666667	heat_M			0.0534815	light_M			0.0376667	comb_M
	0.0391111	heat_SF			0.188556	light_SF			0.0927778	comb_SF
	0.00092593	heat_G			0.002	light_G			0.00103704	comb_G
	0.0153333	heat_M			0.0306667	light_M			0.0341852	comb_M
	0.00825926	heat_SF			0.120296	light_SF			0.107778	comb_SF
	0.0212222	heat_G			0.00133333	light_G			0.0364074	comb_G
	0.019	heat_M			0.0244815	light_M			0.0156667	comb_M
	0.0291482	heat_SF			0.137519	light_SF			0.0704444	comb_SF
	0.00077778	heat_G			0.00037037	light_G			0.00511111	comb_G
	0.00096296	heat_M			0.0373333	light_M			0.0601111	comb_M
	0.0536296	heat_SF			0.148259	light_SF			0.0216296	comb_SF
	0.0376296	heat_G			0.0195556	light_G			0.028037	comb_G
	0	heat_M			0.012	light_M			0.00466667	comb_M
	0.0385556	heat_SF			0.0142963	light_SF			0.0383333	comb_SF
	0.0388889	heat_G			0.0185926	light_G			0	comb_G
	0.0224444	heat_M			0.00848148	light_M			0.00874074	comb_M
	0.00874074	heat_SF			0.0763333	light_SF			0.0335185	comb_SF
	0.00781481	heat_G			0.00885185	light_G			0.00914815	comb_G
	0.0368518	heat_M			0.011037	light_M			0.0564444	comb_M
	0.0288518	heat_SF			0.0740741	light_SF			0.0302593	comb_SF
	0.0106296	heat_G			0.0113333	light_G			0.0218889	comb_G
	0.00077778	heat_M			0	light_M			0.0007037	comb_M
	0.154741	heat_SF			0.133667	light_SF			0.18563	comb_SF
	0.0147037	heat_G			0.00825926	light_G			0.0276296	comb_G
	0.00092593	heat_M			0.00281481	light_M			0	comb_M
	0.0222963	heat_SF			0.0322963	light_SF			0.0258889	comb_SF
	0.0111111	heat_G			0.00381481	light_G			0.00792593	comb_G
	0.00262963	heat_M			0.0194444	light_M			0	comb_M
	0.0401482	heat_SF			0.188444	light_SF			0.185667	comb_SF
	0.00262963	heat_G			0.00037037	light_G			0.00874074	comb_G
	0.094963	heat_M			0.00792593	light_M			0.0104074	comb_M
	0.168148	heat_SF			0.23163	light_SF			0.210815	comb_SF
	0.00722222	heat_G			0.0162593	light_G			0.0176296	comb_G
	0.0926667	heat_M			0.0208519	light_M			0.0171482	comb_M
	0.0458518	heat_SF			0.0761111	light_SF			0.0886667	comb_SF
	0.00385185	heat_G			0.05	light_G			0.00977778	comb_G
	0.00155556	heat_M			0.00392593	light_M			0.0100741	comb_M
	0.128259	heat_SF			0.0545185	light_SF			0.0216296	comb_SF
	0.0212222	heat_G			0.00237037	light_G			0.004	comb_G
	0	heat_M			0	light_M			0.00725926	comb_M
	0.0534444	heat_SF			0.0349259	light_SF			0.0376296	comb_SF
	0.0104074	heat_G			0.00059259	light_G			0.0362593	comb_G
	0.0072963	heat_M			0.0200741	light_M			0.0372593	comb_M
	0.0130741	heat_SF			0.0191111	light_SF			0.0186296	comb_SF
	0.013963	heat_G			0.0908518	light_G			0.0749259	comb_G
	0.0105185	heat_M			0.00151852	light_M			0	comb_M
	0.077963	heat_SF			0.024037	light_SF			0.148333	comb_SF
	0.0158148	heat_G			0.0605926	light_G			0.00348148	comb_G
	0	heat_M			0.00118519	light_M			0	comb_M
	0.241926	heat_SF			0.128444	light_SF			0.117704	comb_SF
	0	heat_G			0	light_G			0	comb_G
	0.00237037	heat_M			0.00177778	light_M			0.00140741	comb_M
	0.0594074	heat_SF			0.234444	light_SF			0.187852	comb_SF
	0	heat_G			0	light_G			0.00288889	comb_G
	0.00303704	heat_M			0.0202963	light_M			0.0221111	comb_M
	0.0642222	heat_SF			0.0576667	light_SF			0.0736667	comb_SF
	0	heat_G			0	light_G			0.0125556	comb_G
	0.00037037	heat_M			0.0205185	light_M			0.0202963	comb_M
	0.19263	heat_SF			0.178519	light_SF			0.140185	comb_SF
	0.0732222	heat_G			0.0103704	light_G			0.00885185	comb_G
	0.0287037	heat_M			0.011	light_M			0.00225926	comb_M
	0.0618148	heat_SF			0.125296	light_SF			0.104185	comb_SF
	0.00814815	heat_G			0.00148148	light_G			0.0182222	comb_G
	0.00455556	heat_M			0.00474074	light_M			0.0128518	comb_M
	0.00925926	heat_SF			0.0327037	light_SF			0.0507037	comb_SF
	0.0087037	heat_G			0.0037037	light_G			0	comb_G
	0	heat_M			0	light_M			0.00211111	comb_M
	0.073	heat_SF			0.143333	light_SF			0.0957407	comb_SF
	0.0455556	heat_G			0.0138519	light_G			0.0175926	comb_G
	0.00025926	heat_M			0.00074074	light_M			0.0201111	comb_M
	0	heat_SF			0.0785556	light_SF			0.0699259	comb_SF
	0	heat_G			0.00722222	light_G			0.00566667	comb_G
	0.00022222	heat_M			0	light_M			0	comb_M
	0.0178889	heat_SF			0.0894074	light_SF			0.085037	comb_SF
	0	heat_G			0.00414815	light_G			0.016963	comb_G
	0.016	heat_M			0.0148148	light_M			0.0389259	comb_M
	0.0318148	heat_SF			0.0631852	light_SF			0.0209259	comb_SF
	0	heat_G			0	light_G			0.0022963	comb_G
	0	heat_M			0.00566667	light_M			0.00585185	comb_M
	0.0052963	heat_SF			0.108741	light_SF			0.137185	comb_SF
	0.00181481	heat_G			0.0198889	light_G			0.00262963	comb_G
	0.0032963	heat_M			0.0147407	light_M			0.0124074	comb_M
	0.16263	heat_SF			0.38437	light_SF			0.316704	comb_SF
	0.111259	heat_G			0.100111	light_G			0.0253704	comb_G
	0.0101852	heat_M			0.019963	light_M			0.0362222	comb_M
	0.0646296	heat_SF			0.106259	light_SF			0.101111	comb_SF
	0.0145926	heat_G			0.0415556	light_G			0.0477407	comb_G
	0.0143704	heat_M			0.0211111	light_M			0.0062963	comb_M
	0.179	heat_SF			0.0837037	light_SF			0.359481	comb_SF
	0.0167778	heat_G			0.00451852	light_G			0.011037	comb_G
	0.00744444	heat_M			0.0261481	light_M			0.0408148	comb_M
	0.0512222	heat_SF			0.00225926	light_SF			0.0138889	comb_SF
	0.003	heat_G			0.00133333	light_G			0.00151852	comb_G
	0.0229259	heat_M			0.0270741	light_M			0.0121852	comb_M
	0.107556	heat_SF			0.0634074	light_SF			0.0926667	comb_SF
	0.151185	heat_G			0.021963	light_G			0.0815556	comb_G
	0	heat_M			0.00592593	light_M			0.0115926	comb_M
	0.0279259	heat_SF			0.0526296	light_SF			0.180741	comb_SF
	0.00574074	heat_G			0.0152222	light_G			0.0534074	comb_G
	0.00018519	heat_M			0.034	light_M			0.0202593	comb_M
	0.173667	heat_SF			0.188185	light_SF			0.291037	comb_SF
	0.00037037	heat_G			0	light_G			0	comb_G
	0.00222222	heat_M			0.00037037	light_M			0.00396296	comb_M
	0.120111	heat_SF			0.129444	light_SF			0.261	comb_SF
	0.0172222	heat_G			0.00025926	light_G			0.0238148	comb_G
	0.0007037	heat_M			0.00266667	light_M			0	comb_M
	0.0175556	heat_SF			0.187444	light_SF			0.129037	comb_SF
	0.0206667	heat_G			0.00407407	light_G			0.00633333	comb_G
	0.00074074	heat_M			0	light_M			0	comb_M
	0.0002963	heat_SF			0.0255185	light_SF			0.197963	comb_SF
	0.0149259	heat_G			0.00466667	light_G			0.0500741	comb_G
	0.00025926	heat_M			0.013	light_M			0.0154074	comb_M
	0.00025926	heat_SF			0.120296	light_SF			0.0574815	comb_SF
	0.00677778	heat_G			0.0542222	light_G			0.00685185	comb_G
	0.00555556	heat_M			0.00737037	light_M			0.00814815	comb_M
	0.00118519	heat_SF			0.0082963	light_SF			0.0483333	comb_SF
	0	heat_G			0.0344444	light_G			0.0206667	comb_G
	0.00477778	heat_M			0.0218518	light_M			0.0221852	comb_M
	0.00896296	heat_SF			0.071037	light_SF			0.0685926	comb_SF
	0.00777778	heat_G			0.00240741	light_G			0.0132593	comb_G
	0.0189259	heat_M			0.0320741	light_M			0.0467037	comb_M
	0.0335185	heat_SF			0.0664074	light_SF			0.0545185	comb_SF
	0.00188889	heat_G			0.00511111	light_G			0.0145556	comb_G
	0	heat_M			0.0007037	light_M			0	comb_M
	0.0686296	heat_SF			0.12437	light_SF			0.136481	comb_SF
	0.0022963	heat_G			0.00640741	light_G			0.00274074	comb_G
	0.00125926	heat_M			0	light_M			0.00944444	comb_M
	0.0541852	heat_SF			0.0941481	light_SF			0.109111	comb_SF
	0.0111482	heat_G			0	light_G			0.00922222	comb_G
	0.0286667	heat_M			0.0384074	light_M			0.0233333	comb_M
	0.0232593	heat_SF			0.251815	light_SF			0.114407	comb_SF
	0.0002963	heat_G			0.018037	light_G			0.0414074	comb_G
	0.00162963	heat_M			0	light_M			0.00025926	comb_M
	0.175815	heat_SF			0.263074	light_SF			0.201963	comb_SF
	0.108556	heat_G			0.337148	light_G			0.253926	comb_G
	0	heat_M			0.00951852	light_M			0.00333333	comb_M
	0.0245556	heat_SF			0.018037	light_SF			0.0136296	comb_SF
	0	heat_G			0.0116296	light_G			0.0190741	comb_G
	0.0114815	heat_M			0.00159259	light_M			0.0281482	comb_M
	0.0108148	heat_SF			0.0437037	light_SF			0.0574815	comb_SF
	0.0267037	heat_G			0.0851852	light_G			0.0255556	comb_G
	0	heat_M			0	light_M			0.00411111	comb_M
	0.119704	heat_SF			0.172259	light_SF			0.168741	comb_SF
	0.00722222	heat_G			0.00837037	light_G			0.00311111	comb_G
	0	heat_M			0.00151852	light_M			0.00040741	comb_M
	0.0517407	heat_SF			0.106259	light_SF			0.099	comb_SF
	0.0796667	heat_G			0	light_G			0	comb_G
	0.0032963	heat_M			0.0227407	light_M			0.0225556	comb_M
	0.0621111	heat_SF			0.144	light_SF			0.206148	comb_SF
	0.0522593	heat_G			0.015963	light_G			0.0227407	comb_G
	0	heat_M			0.00155556	light_M			0	comb_M
	0.0201482	heat_SF			0.133444	light_SF			0.0568519	comb_SF
	0.0884074	heat_G			0.00033333	light_G			0.00881481	comb_G
	0.00148148	heat_M			0	light_M			0.00148148	comb_M
	0.0700741	heat_SF			0.0457407	light_SF			0.129	comb_SF
	0.00092593	heat_G			0.00888889	light_G			0.0154074	comb_G
	0.0375185	heat_M			0.00140741	light_M			0.00025926	comb_M
	0.0953704	heat_SF			0.0551852	light_SF			0.13863	comb_SF
	0.0141852	heat_G			0.0404074	light_G			0.0317778	comb_G
	0	heat_M			0.0183333	light_M			0.0282963	comb_M
	0.0314444	heat_SF			0.0383704	light_SF			0.0447407	comb_SF
	0.00751852	heat_G			0.057963	light_G			0.0215556	comb_G
	0.00092593	heat_M			0.00033333	light_M			0.00018519	comb_M
	0.135556	heat_SF			0.0896296	light_SF			0.239407	comb_SF
	0.0184444	heat_G			0.00611111	light_G			0.0155556	comb_G
	0.00703704	heat_M			0.035	light_M			0.0623704	comb_M
	0.102815	heat_SF			0.175667	light_SF			0.132519	comb_SF
	0.0332963	heat_G			0.0223704	light_G			0.0352963	comb_G
	0.00611111	heat_M			0.00451852	light_M			0.0154815	comb_M
	0.0904444	heat_SF			0.120741	light_SF			0.0645185	comb_SF
	0.021037	heat_G			0.0612963	light_G			0.005	comb_G
	0.00033333	heat_M			0.004	light_M			0.00785185	comb_M
	0.0659259	heat_SF			0.12937	light_SF			0.0792593	comb_SF
	0.00174074	heat_G			0.0107778	light_G			0.021	comb_G
	0.00040741	heat_M			0.00951852	light_M			0.0207407	comb_M
	0.18237	heat_SF			0.199	light_SF			0.372556	comb_SF
	0.00414815	heat_G			0	light_G			0.102185	comb_G
	0.00651852	heat_M			0.00266667	light_M			0.0186296	comb_M
	0.0965185	heat_SF			0.263889	light_SF			0.347963	comb_SF
	0.00196296	heat_G			0.0177037	light_G			0.0109259	comb_G
	0.00044444	heat_M			0.0451481	light_M			0.00944444	comb_M
	0.235074	heat_SF			0.382704	light_SF			0.230296	comb_SF
	0	heat_G			0.00618519	light_G			0.00211111	comb_G
	0	heat_M			0	light_M			0.0115185	comb_M
	0.0282222	heat_SF			0.0278148	light_SF			0.0291852	comb_SF
	0.025037	heat_G			0.00755556	light_G			0.00266667	comb_G
	0.00155556	heat_M			0.00103704	light_M			0	comb_M
	0.0542593	heat_SF			0.0597037	light_SF			0.058	comb_SF
	0.00103704	heat_G			0.00340741	light_G			0	comb_G
	0.00181481	heat_M			0.00403704	light_M			0.0128148	comb_M
	0.126333	heat_SF			0.0904074	light_SF			0.113852	comb_SF
	0.00033333	heat_G			0.00048148	light_G			0	comb_G
	0	heat_M			0.0127778	light_M			0.009	comb_M
	0.0438518	heat_SF			0.149074	light_SF			0.162259	comb_SF
	0	heat_G			0	light_G			0.00755556	comb_G
	0.00062963	heat_M			0	light_M			0.00625926	comb_M
	0.00807407	heat_SF			0.0784815	light_SF			0.12563	comb_SF
	0.00118519	heat_G			0.00022222	light_G			0.00251852	comb_G
	0.0663333	heat_M			0.0531852	light_M			0.0175556	comb_M
	0.0291852	heat_SF			0.0976667	light_SF			0.106074	comb_SF
	0.00944444	heat_G			0.00174074	light_G			0.00040741	comb_G
	0.0103333	heat_M			0.00255556	light_M			0.0158519	comb_M
	0.0306296	heat_SF			0.0118889	light_SF			0.0308519	comb_SF
	0.00181481	heat_G			0	light_G			0.00118519	comb_G
	0.00281481	heat_M			0.0119259	light_M			0.00474074	comb_M
	0.142111	heat_SF			0.263333	light_SF			0.387593	comb_SF
	0.00333333	heat_G			0.00414815	light_G			0.00340741	comb_G
	0.00314815	heat_M			0	light_M			0.0268148	comb_M
	0.0560741	heat_SF			0.0803333	light_SF			0.0758148	comb_SF
	0	heat_G			0	light_G			0	comb_G
	0.0206667	heat_M			0.0410741	light_M			0.0322593	comb_M
	0.0298148	heat_SF			0.131926	light_SF			0.146963	comb_SF
	0.00503704	heat_G			0.00122222	light_G			0.0538518	comb_G
	0	heat_M			0.00359259	light_M			0.00718519	comb_M
	0.152963	heat_SF			0.327111	light_SF			0.256074	comb_SF
	0.00033333	heat_G			0.00022222	light_G			0.00181481	comb_G
	0.00018519	heat_M			0	light_M			0.00348148	comb_M
	0.0863704	heat_SF			0.0844815	light_SF			0.141222	comb_SF
	0.0157407	heat_G			0.02	light_G			0.00796296	comb_G
	0.013	heat_M			0.0352222	light_M			0.0193333	comb_M
	0.0975185	heat_SF			0.160407	light_SF			0.349	comb_SF
	0	heat_G			0.00077778	light_G			0	comb_G
	0.035037	heat_M			0.0490741	light_M			0.015037	comb_M
	0.247148	heat_SF			0.345	light_SF			0.169222	comb_SF
	0.0321482	heat_G			0.0126667	light_G			0.044963	comb_G
	0	heat_M			0.00140741	light_M			0	comb_M
	0	heat_SF			0.0825926	light_SF			0.206519	comb_SF
	0	heat_G			0.00022222	light_G			0.00066667	comb_G
	0.00481481	heat_M			0.00674074	light_M			0.0136667	comb_M
	0.0303704	heat_SF			0.0057037	light_SF			0.0107037	comb_SF
	0.0886296	heat_G			0.116778	light_G			0.0907037	comb_G
	0	heat_M			0	light_M			0	comb_M
	0.0267037	heat_SF			0.0709259	light_SF			0.0497407	comb_SF
	0.0107037	heat_G			0.0153704	light_G			0.0284444	comb_G
	0.00066667	heat_M			0.00277778	light_M			0.00488889	comb_M
	0	heat_SF			0.0294074	light_SF			0.0367037	comb_SF
	0.00044444	heat_G			0.00948148	light_G			0.0255556	comb_G
	0.00740741	heat_M			0.00607407	light_M			0.00692593	comb_M
	0.0257037	heat_SF			0	light_SF			0.0221852	comb_SF
	0.0102963	heat_G			0.0141111	light_G			0.0147778	comb_G
	0.00344444	heat_M			0.00833333	light_M			0.0212222	comb_M
	0.0243333	heat_SF			0.0474074	light_SF			0.0382963	comb_SF
	0.0538889	heat_G			0.00566667	light_G			0.00477778	comb_G
	0.00292593	heat_M			0.0205185	light_M			0.0445556	comb_M
	0.0777407	heat_SF			0.071963	light_SF			0.0987778	comb_SF
	0.0316296	heat_G			0.0171852	light_G			0.0342963	comb_G
	0.0203333	heat_M			0.0172222	light_M			0.00374074	comb_M
	0.019	heat_SF			0.0692593	light_SF			0.0758518	comb_SF
	0.0133704	heat_G			0.0138148	light_G			0.0203704	comb_G
	0	heat_M			0.00522222	light_M			0.0124815	comb_M
	0.0907037	heat_SF			0.0995556	light_SF			0.0798889	comb_SF
	0.0113333	heat_G			0.00481481	light_G			0.008	comb_G
	0.0283704	heat_M			0.00151852	light_M			0.00385185	comb_M
	0.112889	heat_SF			0.0451481	light_SF			0.051037	comb_SF
	0.00862963	heat_G			0.0208148	light_G			0.0274444	comb_G
	0.00451852	heat_M			0.0288889	light_M			0.0535556	comb_M
	0.0508518	heat_SF			0.147259	light_SF			0.150259	comb_SF
	0.0111111	heat_G			0.00288889	light_G			0.0173333	comb_G
	0	heat_M			0.00044444	light_M			0.00137037	comb_M
	0.0348518	heat_SF			0.443963	light_SF			0.290074	comb_SF
	0.0146667	heat_G			0.00322222	light_G			0.00292593	comb_G
	0.00677778	heat_M			0.0182593	light_M			0.0158148	comb_M
	0.0628148	heat_SF			0.072037	light_SF			0.101074	comb_SF
	0.0177037	heat_G			0.0562593	light_G			0.0162222	comb_G
	0.00088889	heat_M			0	light_M			0.00066667	comb_M
	0.0577037	heat_SF			0.00362963	light_SF			0.0806296	comb_SF
	0.00314815	heat_G			0.0307778	light_G			0.0409259	comb_G
	0	heat_M			0	light_M			0.00503704	comb_M
	0.0435556	heat_SF			0.0717037	light_SF			0.193778	comb_SF
	0.0122222	heat_G			0.0221111	light_G			0.0317407	comb_G
	0.0238889	heat_M			0.0298889	light_M			0.0245926	comb_M

## Sheet: Figure 3F
Figure 3F
Heat
time	-120	-114.975	-109.951	-104.926	-99.9015	-94.8768	-89.8522	-84.8276	-79.803	-74.7783	-69.7537	-64.7291	-59.7044	-54.6798	-49.6552	-44.6305	-39.6059	-34.5813	-29.5567	-24.532	-19.5074	-14.4828	-9.45813	-4.4335	0.591133	5.61576	10.6404	15.665	20.6897	25.7143	30.7389	35.7635	40.7882	45.8128	50.8374	55.8621	60.8867	65.9113	70.936	75.9606	80.9852	86.0099	91.0345	96.0591	101.084	106.108	111.133	116.158	121.182
walk3	0.0186395	0.0062585	0.0129932	0.00897959	0.012517	0.0172789	0.0228571	0.0233333	0.00965986	0.0077551	0.0077551	0.00544218	0.00782313	0.0189116	0.0111565	0.0205442	0.012517	0.012517	0.0192517	0.0258503	0.020068	0.0139456	0.0102041	0.0321769	0.192993	0.092449	0.0464626	0.0357823	0.0146258	0.00891156	0.00646259	0.00333333	0.00673469	0.01	0.017483	0.0197279	0.022449	0.0134694	0.00319728	0.0158503	0.0176191	0.0104762	0.00952381	0.00863946	0.0109524	0.00244898	0.00653061	0.00823129	0.00585034
probemale	0.0145578	0.0085034	0.0163946	0.00455782	0.0123809	0.0114286	0.0131293	0.017415	0.00387755	0.00612245	0.00952381	0.00244898	0.00612245	0.010068	0.00353741	0.0141497	0.00741497	0.00482993	0.00646259	0.0121088	0.00653061	0.00612245	0.00945578	0.0220408	0.123333	0.0562585	0.0217687	0.0217007	0.0217007	0.0037415	0.0047619	0.00952381	0.00687075	0.0197279	0.0228571	0.0123129	0.0153741	0.0155102	0.01	0.00571429	0.0134014	0.00965986	0.0113605	0.00904762	0.0142857	0.0106803	0.0130612	0.00428571	0.0070068
fly2	0.00068027	0	0.0007483	0.00285714	0	0.00115646	0.00034014	0	0	0	0.00034014	0.00068027	0.00081633	0.00285714	0	0	0.00034014	0	0	0.00088435	0	0.00020408	0	0.00142857	0.00680272	0.00176871	0.00557823	0.00034014	0.00102041	0	0.00170068	0.00088435	0.00047619	0	0	0	0	0.00142857	0	0	0	0	0	0.00136054	0	0.00020408	0.00068027	0.00142857	0
Light
time	-120	-114.975	-109.951	-104.926	-99.9015	-94.8768	-89.8522	-84.8276	-79.803	-74.7783	-69.7537	-64.7291	-59.7044	-54.6798	-49.6552	-44.6305	-39.6059	-34.5813	-29.5567	-24.532	-19.5074	-14.4828	-9.45813	-4.4335	0.591133	5.61576	10.6404	15.665	20.6897	25.7143	30.7389	35.7635	40.7882	45.8128	50.8374	55.8621	60.8867	65.9113	70.936	75.9606	80.9852	86.0099	91.0345	96.0591	101.084	106.108	111.133	116.158	121.182
walk3	0.00210884	0.00319728	0.0273469	0.035102	0.0237415	0.0177551	0.0127891	0.0133333	0.0112925	0.0007483	0.0085034	0.014966	0.00687075	0.0132653	0.00687075	0.0121769	0.0152381	0.0155782	0.00632653	0.00612245	0.0114966	0.0142857	0.0106122	0.00088435	0.017551	0.0237415	0.0205442	0.0136054	0.0286395	0.0171429	0.00571429	0.0261905	0.0231973	0.0196599	0.014966	0.00884354	0.00537415	0.00210884	0.00278912	0.00435374	0.00285714	0.0151701	0.00612245	0.00612245	0.0120408	0.010068	0.0029932	0.00680272	0.00782313
probemale	0.00401361	0.00312925	0.0180272	0.0204762	0.0208163	0.00863946	0.00530612	0.00244898	0.00265306	0.00231293	0.00537415	0.00707483	0.00455782	0.014898	0.00040816	0.00367347	0.00877551	0.0112245	0.00653061	0.00673469	0.00435374	0.00836735	0.0165986	0.00292517	0.0144218	0.0289796	0.0194558	0.0107483	0.0106803	0.0213605	0.00619048	0.0142177	0.0139456	0.00884354	0.00897959	0.00442177	0.00482993	0.00605442	0.00918367	0.0052381	0.00761905	0.00285714	0.0111565	0.00619048	0.00639456	0.00857143	0.0062585	0.0110884	0.00510204
fly2	0	0	0.00312925	0.00102041	0	0	0	0	0	0	0	0	0.00244898	0	0.00231293	0	0.00428571	0.00333333	0	0	0.00013605	0.00115646	0.00210884	0	0.00204082	0.00095238	0	0.00408163	0	0	0	0	0.0014966	0	0	0.00061224	0	0	0.00115646	0	0.00034014	0	0.00020408	0	0	0	0.00163265	0	0.00013605
Heat + Light
time	-120	-114.975	-109.951	-104.926	-99.9015	-94.8768	-89.8522	-84.8276	-79.803	-74.7783	-69.7537	-64.7291	-59.7044	-54.6798	-49.6552	-44.6305	-39.6059	-34.5813	-29.5567	-24.532	-19.5074	-14.4828	-9.45813	-4.4335	0.591133	5.61576	10.6404	15.665	20.6897	25.7143	30.7389	35.7635	40.7882	45.8128	50.8374	55.8621	60.8867	65.9113	70.936	75.9606	80.9852	86.0099	91.0345	96.0591	101.084	106.108	111.133	116.158	121.182
walk3	0.00312925	0.0047619	0.00931973	0.00768707	0.0131973	0.0212245	0.0127211	0.014898	0.0092517	0.0118367	0.0104082	0.019932	0.0178912	0.00469388	0.00034014	0.00387755	0.00496599	0.0029932	0.0047619	0.00646259	0.0134694	0.0047619	0.00394558	0.0288435	0.176667	0.108503	0.0707483	0.0451701	0.0315646	0.0281633	0.0214966	0.0265986	0.0368027	0.0169388	0.00789116	0.022517	0.022381	0.0195238	0.0205442	0.0137415	0.0197959	0.0462585	0.0387755	0.035102	0.0297959	0.0468027	0.04	0.0244218	0.0142177
probemale	0.00816327	0.00877551	0.0044898	0.00557823	0.0140816	0.0136054	0.00231293	0.0188435	0.00721088	0.00680272	0.00857143	0.0131973	0.00965986	0.00394558	0.00421769	0.00789116	0.00380952	0.00884354	0.00591837	0.00727891	0.00619048	0.00340136	0.0103401	0.0221088	0.101497	0.0677551	0.0378231	0.0232653	0.0251701	0.0181633	0.00816327	0.0183674	0.0134694	0.0231293	0.0108843	0.017551	0.0202041	0.0104082	0.0101361	0.0117687	0.0107483	0.0136735	0.0235374	0.0215646	0.0142177	0.027483	0.0229252	0.0168027	0.00673469
fly2	0.00183673	0	0.00013605	0.00013605	0.00204082	6.8e-05	0.0007483	0.00102041	0.00129252	0.00421769	6.8e-05	0	0	0	6.8e-05	0.00129252	0.00027211	6.8e-05	6.8e-05	0	0	0.00088435	0	0	0.0178231	0.00306122	0.00204082	0.00020408	0.00489796	0.00197279	0.00272109	0	0.00013605	0	0.00190476	0.0022449	0.00319728	0.00095238	0.00122449	6.8e-05	0.0044898	0	0.00068027	0.00319728	0.00278912	0.00020408	0.00081633	0.00292517	0
[truncated: 155 more columns]

## Sheet: Figure 3G
Figure 3G
Heat
time	-120	-114.975	-109.951	-104.926	-99.9015	-94.8768	-89.8522	-84.8276	-79.803	-74.7783	-69.7537	-64.7291	-59.7044	-54.6798	-49.6552	-44.6305	-39.6059	-34.5813	-29.5567	-24.532	-19.5074	-14.4828	-9.45813	-4.4335	0.591133	5.61576	10.6404	15.665	20.6897	25.7143	30.7389	35.7635	40.7882	45.8128	50.8374	55.8621	60.8867	65.9113	70.936	75.9606	80.9852	86.0099	91.0345	96.0591	101.084	106.108	111.133	116.158	121.182
walk3	0.00501718	0.0019244	0.00316151	0.00453608	0.00164948	0.00219931	0.0033677	0.0033677	0.00453608	0.0147079	0.0183505	0.0149141	0.00941581	0.0147766	0.0149828	0.00701031	0.00872852	0.0101718	0.00185567	0.00089347	0.00769759	0.00989691	0.00542955	0.00453608	0.0474227	0.0766323	0.0512027	0.0361512	0.0330584	0.0323024	0.0134708	0.0157388	0.0140894	0.0244673	0.0219931	0.0142268	0.0140894	0.0246048	0.0191065	0.0216495	0.0309278	0.0156014	0.00872852	0.0247423	0.0139519	0.0162199	0.018488	0.0296907	0.035945
probemale	0.00659794	0.00907216	0.00652921	0.00666667	0.00487973	0.0112715	0.0038488	0.00948454	0.00797251	0.013677	0.0204124	0.0153952	0.0128522	0.00865979	0.0134021	0.004811	0.00591065	0.0125773	0.0019244	0.00295533	0.00659794	0.012165	0.004811	0.0052921	0.0263917	0.0309966	0.0322337	0.0213746	0.0175258	0.0147766	0.015189	0.02	0.0194502	0.0146392	0.015945	0.0118213	0.0120962	0.0166323	0.00611684	0.00900344	0.0239863	0.00213058	0.00865979	0.00756014	0.00797251	0.00838488	0.0134708	0.016701	0.0246048
fly2	0.00941581	0.00378007	0.00041237	0.00151203	0	0.0028866	0	0.0028866	0.00749141	0.0019244	0.00680412	0.00068729	0	0	0	0	0	0	0.00281787	0	0	0.00859107	0.00549828	0	0.0279038	0.00707904	0.00549828	0	0	0	0.00728522	0.00378007	0.00013746	0.00034364	0.0009622	0.00309278	0.00082474	0.00041237	0.00103093	0	0	0	0.00487973	0	0	0	0.00329897	0.00020619	0.00041237
Light
time	-120	-114.975	-109.951	-104.926	-99.9015	-94.8768	-89.8522	-84.8276	-79.803	-74.7783	-69.7537	-64.7291	-59.7044	-54.6798	-49.6552	-44.6305	-39.6059	-34.5813	-29.5567	-24.532	-19.5074	-14.4828	-9.45813	-4.4335	0.591133	5.61576	10.6404	15.665	20.6897	25.7143	30.7389	35.7635	40.7882	45.8128	50.8374	55.8621	60.8867	65.9113	70.936	75.9606	80.9852	86.0099	91.0345	96.0591	101.084	106.108	111.133	116.158	121.182
walk3	0.0145705	0.00845361	0.00666667	0.0052921	0.00206186	0.0169072	0.00989691	0.00989691	0.0033677	0.00082474	0.0106529	0.00728522	0.00103093	0.00137457	0.0028866	0.00061856	0.00034364	0	0.00068729	0	0.00068729	0.00103093	0.00776632	0	0.0290034	0.131409	0.138213	0.122955	0.0634364	0.0476289	0.0582131	0.0671478	0.0471478	0.0423368	0.0495533	0.0653608	0.0643986	0.0677663	0.0545704	0.0319588	0.0273539	0.0241924	0.0553265	0.0461856	0.0421993	0.0328522	0.0244673	0.0253608	0.0195876
probemale	0.00618557	0.00728522	0.00790378	0.0113402	0.00247423	0.00804124	0.00680412	0.0114777	0.0142268	0.00405498	0.0153952	0.00975945	0.00460481	0.00426117	0.00426117	0.00927835	0.00659794	0.00742268	0.0112715	0.00398625	0.0067354	0.0138144	0.00666667	0.0133333	0.0109966	0.0376632	0.0554639	0.0745017	0.0316151	0.0335395	0.0249485	0.0345017	0.0319588	0.0330584	0.0277663	0.0363574	0.0294158	0.0347766	0.0233677	0.0275601	0.00439863	0.0286598	0.0383505	0.0194502	0.0164948	0.0133333	0.0140206	0.0224742	0.021512
fly2	0.00350515	0.00219931	0.00116838	0	0	0.00158076	0.00075601	0	0.00116838	0.0043299	0	0	0	0	0	0.0004811	0	0	0	0	0	0	0	0	0.154089	0.0444674	0.0100344	0.00453608	0.00343643	0.0116151	0.0206186	0.00439863	0.00762887	0.00274914	0.00199313	0.00508591	0	0.00742268	0.00845361	0.00659794	0.00295533	0	0.00364261	0.00639175	0.00474227	0.010378	0.00041237	0	0.00714777
Heat + Light
time	-120	-114.975	-109.951	-104.926	-99.9015	-94.8768	-89.8522	-84.8276	-79.803	-74.7783	-69.7537	-64.7291	-59.7044	-54.6798	-49.6552	-44.6305	-39.6059	-34.5813	-29.5567	-24.532	-19.5074	-14.4828	-9.45813	-4.4335	0.591133	5.61576	10.6404	15.665	20.6897	25.7143	30.7389	35.7635	40.7882	45.8128	50.8374	55.8621	60.8867	65.9113	70.936	75.9606	80.9852	86.0099	91.0345	96.0591	101.084	106.108	111.133	116.158	121.182
walk3	0.00213058	0.00185567	0.00103093	0.00178694	0.00116838	0.00068729	0.00137457	0.0004811	0	0	0	0.00082474	0.0014433	0.00316151	0	0.00130584	0.00274914	0.0038488	0	0	0	0	0.00158076	0.00082474	0.036976	0.180619	0.180137	0.0942955	0.0682474	0.0591065	0.0434364	0.0527148	0.0767698	0.0664605	0.0809622	0.105636	0.0860481	0.0304467	0.0242612	0.0304467	0.0504467	0.0290034	0.0262543	0.0235739	0.0251546	0.0127835	0.0143643	0.0279725	0.0164261
probemale	0.00742268	0.00460481	0.0033677	0.0052921	0.00701031	0.0043299	0.00295533	0.00151203	0.00130584	0.00254296	0.00281787	0.00082474	0.00872852	0.00446735	0.0033677	0.00103093	0.00116838	0.00068729	0.00762887	0.0038488	0.00158076	0.00501718	0.00378007	0.00652921	0.0169072	0.0637801	0.0450172	0.0432302	0.0213058	0.0197938	0.0151203	0.0228866	0.0338144	0.0261168	0.0224055	0.0420619	0.0215808	0.015945	0.0105155	0.00694158	0.0286598	0.014433	0.0120962	0.0120962	0.0138832	0.0118213	0.0195876	0.0145017	0.00597938
fly2	0	0.0009622	0	0	0	0	0	0	0	0	0	0	0	0	0	0	0	0	0	0	0	0	0	0	0.144055	0.045567	0.0134708	0.00054983	0.0014433	0.0133333	0.00886598	0.0147766	0.00728522	0.013677	0.00103093	0.00233677	0.0108591	0.0014433	0.0103093	0.00068729	0.00632302	0.00116838	0.00075601	0.0119588	0.00281787	0.00082474	0.00075601	0.00103093	0.00178694
[truncated: 155 more columns]

## Sheet: Figure 3H
Figure 3H
Heat
time	-120	-114.975	-109.951	-104.926	-99.9015	-94.8768	-89.8522	-84.8276	-79.803	-74.7783	-69.7537	-64.7291	-59.7044	-54.6798	-49.6552	-44.6305	-39.6059	-34.5813	-29.5567	-24.532	-19.5074	-14.4828	-9.45813	-4.4335	0.591133	5.61576	10.6404	15.665	20.6897	25.7143	30.7389	35.7635	40.7882	45.8128	50.8374	55.8621	60.8867	65.9113	70.936	75.9606	80.9852	86.0099	91.0345	96.0591	101.084	106.108	111.133	116.158	121.182
walk3	0.00446735	0.00274914	0.00810997	0.0028866	0.00130584	0.00178694	0.00542955	0.0118213	0.00872852	0.00680412	0.00281787	0.00357388	0.00879725	0.0106529	0.00233677	0.0123711	0.0106529	0.0109278	0.00680412	0.0120275	0.0195189	0.0142955	0.0160825	0.0163574	0.194158	0.175326	0.139863	0.141581	0.101856	0.0892784	0.08811	0.0697595	0.0887972	0.0894158	0.082543	0.101787	0.0760825	0.0760825	0.0473539	0.0564261	0.0459794	0.062543	0.0604811	0.0535395	0.0520275	0.06	0.0500344	0.0608247	0.0654296
probemale	0.0057732	0.0140206	0.0107904	0.0127835	0.00714777	0.00467354	0.0182131	0.00934708	0.00398625	0.0028866	0.00226804	0	0.00041237	0.0033677	0.00309278	0.00295533	0.00865979	0.00618557	6.87e-05	0.0009622	0.00721649	0.010378	0.00597938	0.0149141	0.118213	0.0901031	0.0650172	0.0725773	0.0591065	0.0551203	0.0382131	0.0349141	0.043299	0.0419244	0.0389691	0.0615808	0.0435051	0.0371134	0.0331959	0.0427491	0.0261856	0.0281787	0.0314089	0.0273539	0.0423368	0.03189	0.0252921	0.0322337	0.0496907
fly2	0	0	0.004811	0	0	0	0	0	0.00020619	0.00061856	0	0	0	0	0.0014433	0	0	0	0	0	0	0	0.00020619	0.00247423	0.0180756	0.00749141	6.87e-05	0.00199313	0	0	0.00054983	0.00089347	0.00398625	0	0	0.00474227	0.00343643	0.00412371	0.00343643	0	0.00151203	0.0019244	0.00474227	0	0.00034364	0	0.00164948	0.00075601	0
Light
time	-120	-114.975	-109.951	-104.926	-99.9015	-94.8768	-89.8522	-84.8276	-79.803	-74.7783	-69.7537	-64.7291	-59.7044	-54.6798	-49.6552	-44.6305	-39.6059	-34.5813	-29.5567	-24.532	-19.5074	-14.4828	-9.45813	-4.4335	0.591133	5.61576	10.6404	15.665	20.6897	25.7143	30.7389	35.7635	40.7882	45.8128	50.8374	55.8621	60.8867	65.9113	70.936	75.9606	80.9852	86.0099	91.0345	96.0591	101.084	106.108	111.133	116.158	121.182
walk3	0.00975945	0.00419244	0.00948454	0.0193814	0.0156701	0.0193814	0.0171134	0.0224742	0.0142955	0.00756014	0.00391753	0.0191753	0.0138832	0.0168385	0.0142268	0.0131272	0.0181443	0.0175945	0.00542955	0.004811	0.00109966	0.0009622	0.00920962	0.0160138	0.10921	0.26866	0.308179	0.325361	0.331203	0.357045	0.380137	0.350722	0.363368	0.283024	0.307423	0.325636	0.327973	0.343299	0.302268	0.357663	0.286804	0.289553	0.262749	0.256426	0.197869	0.191821	0.25299	0.227079	0.250172
probemale	0.00611684	0.012165	0.00762887	0.014433	0.00618557	0.0120962	0.01189	0.0103093	0.00591065	0.00508591	0.00467354	0.0113402	0.00439863	0.00783505	0.00886598	0.00927835	0.015945	0.0211684	0.0100344	0.0116839	0.0120275	0.0106529	0.0136083	0.0166323	0.0412371	0.102199	0.138694	0.163505	0.148385	0.162887	0.175464	0.192096	0.156907	0.129691	0.163986	0.138351	0.15622	0.159381	0.124399	0.164605	0.146667	0.159313	0.108729	0.114021	0.0765636	0.0763574	0.130447	0.138213	0.0960137
fly2	0	0.00206186	0	0	0.00412371	0	0.0038488	0	0.00357388	0.00068729	0	0.00020619	0	0.00323024	0.00020619	0.00109966	0.00879725	0	0	0	0	0.00020619	0.00261168	0	0.113402	0.0262543	0.0143643	0.0181443	0.0105155	0.00542955	0.00213058	0.00646048	0.0107216	0.0175945	0.00494845	0.00522337	0.00591065	0.00756014	0.00405498	0.00838488	0.015189	0.00398625	0.00309278	0.0105155	0.013677	0.0156701	0.00604811	0.0178007	0.00701031
Heat + Light
time	-120	-114.975	-109.951	-104.926	-99.9015	-94.8768	-89.8522	-84.8276	-79.803	-74.7783	-69.7537	-64.7291	-59.7044	-54.6798	-49.6552	-44.6305	-39.6059	-34.5813	-29.5567	-24.532	-19.5074	-14.4828	-9.45813	-4.4335	0.591133	5.61576	10.6404	15.665	20.6897	25.7143	30.7389	35.7635	40.7882	45.8128	50.8374	55.8621	60.8867	65.9113	70.936	75.9606	80.9852	86.0099	91.0345	96.0591	101.084	106.108	111.133	116.158	121.182
walk3	0.00597938	0.0206873	0.0309966	0.0128522	0.015189	0.017732	0.0184192	0.0180069	0.0140206	0.017457	0.0200687	0.0206186	0.012165	0.0125773	0.00982818	0.0183505	0.00281787	0.00171821	0.0028866	0.0183505	0.0160825	0.00859107	0.00103093	0.0183505	0.193608	0.414502	0.429485	0.431065	0.413746	0.404742	0.411271	0.393333	0.39677	0.381581	0.347766	0.353952	0.347423	0.312921	0.305086	0.265361	0.254158	0.28646	0.2811	0.280962	0.29299	0.278625	0.243918	0.227698	0.237113
probemale	0.0062543	0.0158076	0.0140206	0.0120962	0.0186254	0.0180069	0.0113402	0.0189003	0.00646048	0.0147079	0.0171134	0.0157388	0.00446735	0.00707904	0.0158076	0.0135395	0.00907216	0.0138832	0.00219931	0.0107904	0.0169072	0.00556701	0.00268041	0.0125086	0.0953265	0.177869	0.172646	0.193127	0.196976	0.217388	0.209828	0.176976	0.198144	0.195464	0.173814	0.193814	0.177594	0.145979	0.117595	0.125911	0.129553	0.142955	0.16323	0.145292	0.155601	0.150309	0.138557	0.128522	0.12323
fly2	0	0	0.00453608	0.00364261	0.00137457	0.00295533	0.00247423	0.0014433	0.00061856	0	0	0	0.00611684	0.00178694	0	0	0.00439863	0	0.00158076	0.00268041	0.0024055	0.00206186	0.0033677	0	0.0819931	0.026323	0.0236426	0.024055	0.00542955	0.0112027	0.0128522	0.00962199	0.00487973	0.0145705	0.00859107	0.0156014	0.00515464	0.0122337	0.0107216	0.0172509	0.00618557	0.00570447	0.00164948	0.00549828	0.00776632	0.00920962	0.00721649	0.00597938	0.00501718
[truncated: 155 more columns]

## Sheet: Figure 3I
Figure 3I
Heat	behavior_prop	stimulus		Light	behavior_prop	stimulus		Heat + Light	behavior_prop	stimulus
	0	FruDel_heat			0	FruDel_light			0	FruDel_comb
	0	FruHet_Gr3>CsC_heat			0.0546667	FruHet_Gr3>CsC_light			0.0668889	FruHet_Gr3>CsC_comb
	0.00855556	FruDel_Gr3>CsC_heat			0.228	FruDel_Gr3>CsC_light			0.139	FruDel_Gr3>CsC_comb
	0.0112222	FruDel_heat			0	FruDel_light			0.263	FruDel_comb
	0	FruHet_Gr3>CsC_heat			0	FruHet_Gr3>CsC_light			0	FruHet_Gr3>CsC_comb
	0	FruDel_Gr3>CsC_heat			0.0547778	FruDel_Gr3>CsC_light			0.00166667	FruDel_Gr3>CsC_comb
	0.0556667	FruDel_heat			0	FruDel_light			0	FruDel_comb
	0.00144444	FruHet_Gr3>CsC_heat			0.0231111	FruHet_Gr3>CsC_light			0.0161111	FruHet_Gr3>CsC_comb
	0.0351111	FruDel_Gr3>CsC_heat			0.184556	FruDel_Gr3>CsC_light			0.0423333	FruDel_Gr3>CsC_comb
	0	FruDel_heat			0	FruDel_light			0.00222222	FruDel_comb
	0.00333333	FruHet_Gr3>CsC_heat			0	FruHet_Gr3>CsC_light			0	FruHet_Gr3>CsC_comb
	0.031	FruDel_Gr3>CsC_heat			0.0321111	FruDel_Gr3>CsC_light			0.0393333	FruDel_Gr3>CsC_comb
	0	FruDel_heat			0	FruDel_light			0.121556	FruDel_comb
	0	FruHet_Gr3>CsC_heat			0.0374444	FruHet_Gr3>CsC_light			0.140667	FruHet_Gr3>CsC_comb
	0.0132222	FruDel_Gr3>CsC_heat			0.133111	FruDel_Gr3>CsC_light			0.182	FruDel_Gr3>CsC_comb
	0	FruDel_heat			0	FruDel_light			0.0138889	FruDel_comb
	0	FruHet_Gr3>CsC_heat			0.0161111	FruHet_Gr3>CsC_light			0.00666667	FruHet_Gr3>CsC_comb
	0.00133333	FruDel_Gr3>CsC_heat			0	FruDel_Gr3>CsC_light			0.0141111	FruDel_Gr3>CsC_comb
	0.00933333	FruDel_heat			0.00533333	FruDel_light			0.0121111	FruDel_comb
	0	FruHet_Gr3>CsC_heat			0	FruHet_Gr3>CsC_light			0.00566667	FruHet_Gr3>CsC_comb
	0.0914444	FruDel_Gr3>CsC_heat			0	FruDel_Gr3>CsC_light			0.0121111	FruDel_Gr3>CsC_comb
	0	FruDel_heat			0.00511111	FruDel_light			0.00144444	FruDel_comb
	0.00866667	FruHet_Gr3>CsC_heat			0.143333	FruHet_Gr3>CsC_light			0.00488889	FruHet_Gr3>CsC_comb
	0	FruDel_Gr3>CsC_heat			0.599778	FruDel_Gr3>CsC_light			0.477444	FruDel_Gr3>CsC_comb
	0.0158889	FruDel_heat			0	FruDel_light			0.0173333	FruDel_comb
	0	FruHet_Gr3>CsC_heat			0.116889	FruHet_Gr3>CsC_light			0.0734444	FruHet_Gr3>CsC_comb
	0.0611111	FruDel_Gr3>CsC_heat			0.0126667	FruDel_Gr3>CsC_light			0.141	FruDel_Gr3>CsC_comb
	0.005	FruDel_heat			0.0113333	FruDel_light			0.00144444	FruDel_comb
	0.0166667	FruHet_Gr3>CsC_heat			0.00077778	FruHet_Gr3>CsC_light			0	FruHet_Gr3>CsC_comb
	0.0101111	FruDel_Gr3>CsC_heat			0.00433333	FruDel_Gr3>CsC_light			0.0443333	FruDel_Gr3>CsC_comb
	0.00844444	FruDel_heat			0	FruDel_light			0.00544444	FruDel_comb
	0.015	FruHet_Gr3>CsC_heat			0.05	FruHet_Gr3>CsC_light			0	FruHet_Gr3>CsC_comb
	0.0857778	FruDel_Gr3>CsC_heat			0	FruDel_Gr3>CsC_light			0	FruDel_Gr3>CsC_comb
	0	FruDel_heat			0	FruDel_light			0.127889	FruDel_comb
	0.00277778	FruHet_Gr3>CsC_heat			0.156333	FruHet_Gr3>CsC_light			0.00588889	FruHet_Gr3>CsC_comb
	0.108222	FruDel_Gr3>CsC_heat			0.346	FruDel_Gr3>CsC_light			0.188333	FruDel_Gr3>CsC_comb
	0.044	FruDel_heat			0.0106667	FruDel_light			0.0323333	FruDel_comb
	0.011	FruHet_Gr3>CsC_heat			0.115222	FruHet_Gr3>CsC_light			0.00622222	FruHet_Gr3>CsC_comb
	0.0212222	FruDel_Gr3>CsC_heat			0.00922222	FruDel_Gr3>CsC_light			0.0165556	FruDel_Gr3>CsC_comb
	0	FruDel_heat			0	FruDel_light			0	FruDel_comb
	0.0168889	FruHet_Gr3>CsC_heat			0.0574444	FruHet_Gr3>CsC_light			0.00511111	FruHet_Gr3>CsC_comb
	0.000666667	FruDel_Gr3>CsC_heat			0.136667	FruDel_Gr3>CsC_light			0	FruDel_Gr3>CsC_comb
	0	FruDel_heat			0.128111	FruDel_light			0	FruDel_comb
	0	FruHet_Gr3>CsC_heat			0.0657778	FruHet_Gr3>CsC_light			0.00966667	FruHet_Gr3>CsC_comb
	0	FruDel_Gr3>CsC_heat			0.445556	FruDel_Gr3>CsC_light			0.341667	FruDel_Gr3>CsC_comb
	0.014	FruDel_heat			0	FruDel_light			0.0407778	FruDel_comb
	0	FruHet_Gr3>CsC_heat			0.0752222	FruHet_Gr3>CsC_light			0.0448889	FruHet_Gr3>CsC_comb
	0.0378889	FruDel_Gr3>CsC_heat			0	FruDel_Gr3>CsC_light			0	FruDel_Gr3>CsC_comb
	0.00766667	FruDel_heat			0.002	FruDel_light			0.00533333	FruDel_comb
	0.00833333	FruHet_Gr3>CsC_heat			0.00622222	FruHet_Gr3>CsC_light			0	FruHet_Gr3>CsC_comb
	0.0213333	FruDel_Gr3>CsC_heat			0.015	FruDel_Gr3>CsC_light			0	FruDel_Gr3>CsC_comb
	0	FruDel_heat			0	FruDel_light			0.00644444	FruDel_comb
	0	FruHet_Gr3>CsC_heat			0.06	FruHet_Gr3>CsC_light			0	FruHet_Gr3>CsC_comb
	0.00844444	FruDel_Gr3>CsC_heat			0.00777778	FruDel_Gr3>CsC_light			0	FruDel_Gr3>CsC_comb
	0.016	FruDel_heat			0.00166667	FruDel_light			0.00122222	FruDel_comb
	0	FruHet_Gr3>CsC_heat			0.0154444	FruHet_Gr3>CsC_light			0	FruHet_Gr3>CsC_comb
	0.0163333	FruDel_Gr3>CsC_heat			0.0206667	FruDel_Gr3>CsC_light			0.00477778	FruDel_Gr3>CsC_comb
	0.00577778	FruDel_heat			0.00833333	FruDel_light			0.0288889	FruDel_comb
	0.00544444	FruHet_Gr3>CsC_heat			0.0332222	FruHet_Gr3>CsC_light			0.0266667	FruHet_Gr3>CsC_comb
	0	FruDel_Gr3>CsC_heat			0.0243333	FruDel_Gr3>CsC_light			0.014	FruDel_Gr3>CsC_comb
	0	FruDel_heat			0	FruDel_light			0	FruDel_comb
	0.00166667	FruHet_Gr3>CsC_heat			0.00822222	FruHet_Gr3>CsC_light			0.0223333	FruHet_Gr3>CsC_comb
	0.0968889	FruDel_Gr3>CsC_heat			0.113889	FruDel_Gr3>CsC_light			0.144111	FruDel_Gr3>CsC_comb
	0	FruDel_heat			0.00111111	FruDel_light			0.11	FruDel_comb
	0.0293333	FruHet_Gr3>CsC_heat			0.191556	FruHet_Gr3>CsC_light			0.0104444	FruHet_Gr3>CsC_comb
	0.0538889	FruDel_Gr3>CsC_heat			0.0848889	FruDel_Gr3>CsC_light			0.0348889	FruDel_Gr3>CsC_comb
	0.0206667	FruDel_heat			0.127889	FruDel_light			0.00822222	FruDel_comb
	0	FruHet_Gr3>CsC_heat			0	FruHet_Gr3>CsC_light			0	FruHet_Gr3>CsC_comb
	0	FruDel_Gr3>CsC_heat			0.111667	FruDel_Gr3>CsC_light			0	FruDel_Gr3>CsC_comb
	0.00233333	FruDel_heat			0	FruDel_light			0.0251111	FruDel_comb
	0.00111111	FruHet_Gr3>CsC_heat			0.00533333	FruHet_Gr3>CsC_light			0.00133333	FruHet_Gr3>CsC_comb
	0.024	FruDel_Gr3>CsC_heat			0.248	FruDel_Gr3>CsC_light			0.18	FruDel_Gr3>CsC_comb
	0.109333	FruDel_heat			0	FruDel_light			0.00088889	FruDel_comb
	0	FruHet_Gr3>CsC_heat			0.126	FruHet_Gr3>CsC_light			0.00188889	FruHet_Gr3>CsC_comb
	0.00255556	FruDel_Gr3>CsC_heat			0	FruDel_Gr3>CsC_light			0	FruDel_Gr3>CsC_comb
	0.00822222	FruDel_heat			0.00055556	FruDel_light			0	FruDel_comb
	0.0295556	FruHet_Gr3>CsC_heat			0	FruHet_Gr3>CsC_light			0	FruHet_Gr3>CsC_comb
	0	FruDel_Gr3>CsC_heat			0.00455556	FruDel_Gr3>CsC_light			0.0761111	FruDel_Gr3>CsC_comb
	0	FruDel_heat			0	FruDel_light			0	FruDel_comb
	0.0102222	FruHet_Gr3>CsC_heat			0.0218889	FruHet_Gr3>CsC_light			0.00188889	FruHet_Gr3>CsC_comb
	0.0204444	FruDel_Gr3>CsC_heat			0.00088889	FruDel_Gr3>CsC_light			0.0408889	FruDel_Gr3>CsC_comb
	0.0133333	FruDel_heat			0.0555556	FruDel_light			0.0661111	FruDel_comb
	0	FruHet_Gr3>CsC_heat			0.105111	FruHet_Gr3>CsC_light			0.0436667	FruHet_Gr3>CsC_comb
	0.00877778	FruDel_Gr3>CsC_heat			0.240889	FruDel_Gr3>CsC_light			0.100667	FruDel_Gr3>CsC_comb
	0	FruDel_heat			0	FruDel_light			0.179111	FruDel_comb
	0	FruHet_Gr3>CsC_heat			0	FruHet_Gr3>CsC_light			0	FruHet_Gr3>CsC_comb
	0.414889	FruDel_Gr3>CsC_heat			0.494	FruDel_Gr3>CsC_light			0.453222	FruDel_Gr3>CsC_comb
	0	FruDel_heat			0.00755556	FruDel_light			0.0331111	FruDel_comb
	0	FruHet_Gr3>CsC_heat			0	FruHet_Gr3>CsC_light			0.112111	FruHet_Gr3>CsC_comb
	0.0676667	FruDel_Gr3>CsC_heat			0.717667	FruDel_Gr3>CsC_light			0.529333	FruDel_Gr3>CsC_comb
	0.00122222	FruDel_heat			0.00111111	FruDel_light			0.021	FruDel_comb
	0	FruHet_Gr3>CsC_heat			0	FruHet_Gr3>CsC_light			0.0672222	FruHet_Gr3>CsC_comb
	0	FruDel_Gr3>CsC_heat			0.391667	FruDel_Gr3>CsC_light			0.154444	FruDel_Gr3>CsC_comb
	0.144	FruDel_heat			0	FruDel_light			0	FruDel_comb
	0.00288889	FruHet_Gr3>CsC_heat			0.00255556	FruHet_Gr3>CsC_light			0.0608889	FruHet_Gr3>CsC_comb
	0	FruDel_Gr3>CsC_heat			0.254	FruDel_Gr3>CsC_light			0.319	FruDel_Gr3>CsC_comb
	0	FruDel_heat			0.00455556	FruDel_light			0.00933333	FruDel_comb
	0	FruHet_Gr3>CsC_heat			0	FruHet_Gr3>CsC_light			0	FruHet_Gr3>CsC_comb
	0.0116667	FruDel_Gr3>CsC_heat			0.09	FruDel_Gr3>CsC_light			0	FruDel_Gr3>CsC_comb
	0	FruDel_heat			0	FruDel_light			0	FruDel_comb
	0	FruHet_Gr3>CsC_heat			0	FruHet_Gr3>CsC_light			0.0192222	FruHet_Gr3>CsC_comb
	0	FruDel_Gr3>CsC_heat			0.317	FruDel_Gr3>CsC_light			0.185556	FruDel_Gr3>CsC_comb
	0.00644444	FruDel_heat			0	FruDel_light			0	FruDel_comb
	0.0314444	FruHet_Gr3>CsC_heat			0.004	FruHet_Gr3>CsC_light			0.0103333	FruHet_Gr3>CsC_comb
	0.0198889	FruDel_Gr3>CsC_heat			0.0754444	FruDel_Gr3>CsC_light			0.162	FruDel_Gr3>CsC_comb
	0.0337778	FruDel_heat			0.066	FruDel_light			0.237333	FruDel_comb
	0	FruHet_Gr3>CsC_heat			0	FruHet_Gr3>CsC_light			0	FruHet_Gr3>CsC_comb
	0.00344444	FruDel_Gr3>CsC_heat			0.321333	FruDel_Gr3>CsC_light			0.023	FruDel_Gr3>CsC_comb
	0.00277778	FruDel_heat			0	FruDel_light			0.00155556	FruDel_comb
	0.000555556	FruHet_Gr3>CsC_heat			0	FruHet_Gr3>CsC_light			0.06	FruHet_Gr3>CsC_comb
	0.0157778	FruDel_Gr3>CsC_heat			0.0344444	FruDel_Gr3>CsC_light			0.127889	FruDel_Gr3>CsC_comb
	0.0373333	FruDel_heat			0.0304444	FruDel_light			0.0172222	FruDel_comb
	0.000666667	FruHet_Gr3>CsC_heat			0	FruHet_Gr3>CsC_light			0.0131111	FruHet_Gr3>CsC_comb
	0.000777778	FruDel_Gr3>CsC_heat			0.0858889	FruDel_Gr3>CsC_light			0.390778	FruDel_Gr3>CsC_comb
	0	FruDel_heat			0	FruDel_light			0	FruDel_comb
	0.001	FruHet_Gr3>CsC_heat			0.0404444	FruHet_Gr3>CsC_light			0.0545556	FruHet_Gr3>CsC_comb
	0.0572222	FruDel_Gr3>CsC_heat			0.241444	FruDel_Gr3>CsC_light			0.00533333	FruDel_Gr3>CsC_comb
	0	FruDel_heat			0	FruDel_light			0.00055556	FruDel_comb
	0.00555556	FruHet_Gr3>CsC_heat			0	FruHet_Gr3>CsC_light			0.0593333	FruHet_Gr3>CsC_comb
	0.190556	FruDel_Gr3>CsC_heat			0.0743333	FruDel_Gr3>CsC_light			0.233222	FruDel_Gr3>CsC_comb
	0	FruDel_heat			0	FruDel_light			0	FruDel_comb
	0	FruHet_Gr3>CsC_heat			0	FruHet_Gr3>CsC_light			0.0138889	FruHet_Gr3>CsC_comb
	0.0124444	FruDel_Gr3>CsC_heat			0.125444	FruDel_Gr3>CsC_light			0.238556	FruDel_Gr3>CsC_comb
	0	FruDel_heat			0	FruDel_light			0.00166667	FruDel_comb
	0.169111	FruHet_Gr3>CsC_heat			0.00955556	FruHet_Gr3>CsC_light			0	FruHet_Gr3>CsC_comb
	0.00966667	FruDel_Gr3>CsC_heat			0	FruDel_Gr3>CsC_light			0.00055556	FruDel_Gr3>CsC_comb
	0.00233333	FruDel_heat			0	FruDel_light			0	FruDel_comb
	0	FruHet_Gr3>CsC_heat			0.125778	FruHet_Gr3>CsC_light			0.017	FruHet_Gr3>CsC_comb
	0.0541111	FruDel_Gr3>CsC_heat			0.0576667	FruDel_Gr3>CsC_light			0.236556	FruDel_Gr3>CsC_comb
	0	FruDel_heat			0	FruDel_light			0	FruDel_comb
	0.000777778	FruHet_Gr3>CsC_heat			0	FruHet_Gr3>CsC_light			0.0241111	FruHet_Gr3>CsC_comb
	0	FruDel_Gr3>CsC_heat			0	FruDel_Gr3>CsC_light			0.226889	FruDel_Gr3>CsC_comb
	0.0381111	FruDel_heat			0	FruDel_light			0.00155556	FruDel_comb
	0.000555556	FruHet_Gr3>CsC_heat			0.00944444	FruHet_Gr3>CsC_light			0.0354444	FruHet_Gr3>CsC_comb
	0.190667	FruDel_Gr3>CsC_heat			0.488889	FruDel_Gr3>CsC_light			0.490778	FruDel_Gr3>CsC_comb
	0	FruDel_heat			0	FruDel_light			0	FruDel_comb
	0.00411111	FruHet_Gr3>CsC_heat			0.09	FruHet_Gr3>CsC_light			0.0397778	FruHet_Gr3>CsC_comb
	0.0328889	FruDel_Gr3>CsC_heat			0.265333	FruDel_Gr3>CsC_light			0.278333	FruDel_Gr3>CsC_comb
	0.0431111	FruDel_heat			0	FruDel_light			0.0247778	FruDel_comb
	0	FruHet_Gr3>CsC_heat			0.159667	FruHet_Gr3>CsC_light			0	FruHet_Gr3>CsC_comb
	0	FruDel_Gr3>CsC_heat			0.0995556	FruDel_Gr3>CsC_light			0.0543333	FruDel_Gr3>CsC_comb
	0.0641111	FruDel_heat			0	FruDel_light			0.0577778	FruDel_comb
	0	FruHet_Gr3>CsC_heat			0.0166667	FruHet_Gr3>CsC_light			0.0175556	FruHet_Gr3>CsC_comb
	0	FruDel_Gr3>CsC_heat			0.135333	FruDel_Gr3>CsC_light			0.115111	FruDel_Gr3>CsC_comb
	0.0357778	FruDel_heat			0.0183333	FruDel_light			0.0827778	FruDel_comb
	0	FruHet_Gr3>CsC_heat			0	FruHet_Gr3>CsC_light			0	FruHet_Gr3>CsC_comb
	0.495222	FruDel_Gr3>CsC_heat			0.713	FruDel_Gr3>CsC_light			0.639222	FruDel_Gr3>CsC_comb
	0.00188889	FruDel_heat			0	FruDel_light			0	FruDel_comb
	0.251111	FruHet_Gr3>CsC_heat			0	FruHet_Gr3>CsC_light			0	FruHet_Gr3>CsC_comb
	0	FruDel_Gr3>CsC_heat			0.0302222	FruDel_Gr3>CsC_light			0.00255556	FruDel_Gr3>CsC_comb
	0.0802222	FruDel_heat			0.0897778	FruDel_light			0.00988889	FruDel_comb
	0.000666667	FruHet_Gr3>CsC_heat			0.0124444	FruHet_Gr3>CsC_light			0	FruHet_Gr3>CsC_comb
	0.0763333	FruDel_Gr3>CsC_heat			0.174222	FruDel_Gr3>CsC_light			0.194889	FruDel_Gr3>CsC_comb
	0	FruDel_heat			0.0333333	FruDel_light			0.0724444	FruDel_comb
	0.00344444	FruHet_Gr3>CsC_heat			0.00233333	FruHet_Gr3>CsC_light			0.0575556	FruHet_Gr3>CsC_comb
	0.177222	FruDel_Gr3>CsC_heat			0.013	FruDel_Gr3>CsC_light			0.311778	FruDel_Gr3>CsC_comb
	0.014	FruDel_heat			0	FruDel_light			0.0176667	FruDel_comb
	0.00155556	FruHet_Gr3>CsC_heat			0	FruHet_Gr3>CsC_light			0.0191111	FruHet_Gr3>CsC_comb
	0.00444444	FruDel_Gr3>CsC_heat			0.170444	FruDel_Gr3>CsC_light			0.152556	FruDel_Gr3>CsC_comb
	0.00122222	FruDel_heat			0	FruDel_light			0.00644444	FruDel_comb
	0	FruHet_Gr3>CsC_heat			0.00577778	FruHet_Gr3>CsC_light			0.0307778	FruHet_Gr3>CsC_comb
	0.0926667	FruDel_Gr3>CsC_heat			0.220778	FruDel_Gr3>CsC_light			0.100778	FruDel_Gr3>CsC_comb
	0	FruDel_heat			0	FruDel_light			0.00688889	FruDel_comb
	0	FruHet_Gr3>CsC_heat			0	FruHet_Gr3>CsC_light			0.00122222	FruHet_Gr3>CsC_comb
	0.0431111	FruDel_Gr3>CsC_heat			0.197556	FruDel_Gr3>CsC_light			0.0696667	FruDel_Gr3>CsC_comb
	0.00611111	FruDel_heat			0.0127778	FruDel_light			0.0317778	FruDel_comb
	0	FruHet_Gr3>CsC_heat			0.0114444	FruHet_Gr3>CsC_light			0.0155556	FruHet_Gr3>CsC_comb
	0.127778	FruDel_Gr3>CsC_heat			0.00066667	FruDel_Gr3>CsC_light			0.128333	FruDel_Gr3>CsC_comb
	0.00122222	FruDel_heat			0.00066667	FruDel_light			0.00422222	FruDel_comb
	0.0178889	FruHet_Gr3>CsC_heat			0.00055556	FruHet_Gr3>CsC_light			0.0153333	FruHet_Gr3>CsC_comb
	0.347444	FruDel_Gr3>CsC_heat			0.346667	FruDel_Gr3>CsC_light			0.517	FruDel_Gr3>CsC_comb
	0.0288889	FruDel_heat			0.0872222	FruDel_light			0.0708889	FruDel_comb
	0.00333333	FruHet_Gr3>CsC_heat			0.00222222	FruHet_Gr3>CsC_light			0.0111111	FruHet_Gr3>CsC_comb
	0	FruDel_Gr3>CsC_heat			0.0335556	FruDel_Gr3>CsC_light			0.201222	FruDel_Gr3>CsC_comb
	0.00777778	FruDel_heat			0	FruDel_light			0	FruDel_comb
	0.0363333	FruHet_Gr3>CsC_heat			0.0218889	FruHet_Gr3>CsC_light			0	FruHet_Gr3>CsC_comb
	0.113	FruDel_Gr3>CsC_heat			0.095	FruDel_Gr3>CsC_light			0.00333333	FruDel_Gr3>CsC_comb
	0.0103333	FruDel_heat			0	FruDel_light			0	FruDel_comb
	0.0333333	FruHet_Gr3>CsC_heat			0.0616667	FruHet_Gr3>CsC_light			0.00166667	FruHet_Gr3>CsC_comb
	0.0335556	FruDel_Gr3>CsC_heat			0.344222	FruDel_Gr3>CsC_light			0.354556	FruDel_Gr3>CsC_comb
	0.00111111	FruDel_heat			0	FruDel_light			0.00788889	FruDel_comb
	0.0104444	FruHet_Gr3>CsC_heat			0.00788889	FruHet_Gr3>CsC_light			0.00166667	FruHet_Gr3>CsC_comb
	0.00344444	FruDel_Gr3>CsC_heat			0.187556	FruDel_Gr3>CsC_light			0.125222	FruDel_Gr3>CsC_comb
	0.00655556	FruDel_heat			0	FruDel_light			0	FruDel_comb
	0.0818889	FruHet_Gr3>CsC_heat			0	FruHet_Gr3>CsC_light			0.0581111	FruHet_Gr3>CsC_comb
	0	FruDel_Gr3>CsC_heat			0.136111	FruDel_Gr3>CsC_light			0.207111	FruDel_Gr3>CsC_comb
	0.0142222	FruDel_heat			0	FruDel_light			0.014	FruDel_comb
	0.01	FruHet_Gr3>CsC_heat			0.00255556	FruHet_Gr3>CsC_light			0.0291111	FruHet_Gr3>CsC_comb
	0.00377778	FruDel_Gr3>CsC_heat			0.146222	FruDel_Gr3>CsC_light			0.197222	FruDel_Gr3>CsC_comb
	0.0194444	FruDel_heat			0	FruDel_light			0.00755556	FruDel_comb
	0	FruHet_Gr3>CsC_heat			0	FruHet_Gr3>CsC_light			0.0967778	FruHet_Gr3>CsC_comb
	0.303	FruDel_Gr3>CsC_heat			0.726667	FruDel_Gr3>CsC_light			0.454667	FruDel_Gr3>CsC_comb
	0	FruDel_heat			0	FruDel_light			0.0178889	FruDel_comb
	0	FruHet_Gr3>CsC_heat			0.0802222	FruHet_Gr3>CsC_light			0.0788889	FruHet_Gr3>CsC_comb
	0	FruDel_Gr3>CsC_heat			0.216	FruDel_Gr3>CsC_light			0	FruDel_Gr3>CsC_comb
	0.0213333	FruDel_heat			0	FruDel_light			0.0338889	FruDel_comb
	0.0287778	FruHet_Gr3>CsC_heat			0.0346667	FruHet_Gr3>CsC_light			0.0223333	FruHet_Gr3>CsC_comb
	0.00255556	FruDel_Gr3>CsC_heat			0	FruDel_Gr3>CsC_light			0.0602222	FruDel_Gr3>CsC_comb
	0.00766667	FruDel_heat			0	FruDel_light			0	FruDel_comb
	0.0212222	FruHet_Gr3>CsC_heat			0.00077778	FruHet_Gr3>CsC_light			0.0813333	FruHet_Gr3>CsC_comb
	0	FruDel_Gr3>CsC_heat			0.077	FruDel_Gr3>CsC_light			0.117889	FruDel_Gr3>CsC_comb
	0.0142222	FruDel_heat			0	FruDel_light			0.157333	FruDel_comb
	0	FruHet_Gr3>CsC_heat			0.098	FruHet_Gr3>CsC_light			0.131667	FruHet_Gr3>CsC_comb
	0.000777778	FruDel_Gr3>CsC_heat			0	FruDel_Gr3>CsC_light			0.225556	FruDel_Gr3>CsC_comb
	0.0178889	FruDel_heat			0	FruDel_light			0.00366667	FruDel_comb
	0	FruHet_Gr3>CsC_heat			0.109444	FruHet_Gr3>CsC_light			0.167556	FruHet_Gr3>CsC_comb
	0.0157778	FruDel_Gr3>CsC_heat			0.0897778	FruDel_Gr3>CsC_light			0.0241111	FruDel_Gr3>CsC_comb
	0	FruDel_heat			0	FruDel_light			0	FruDel_comb
	0	FruHet_Gr3>CsC_heat			0	FruHet_Gr3>CsC_light			0.0243333	FruHet_Gr3>CsC_comb
	0.178444	FruDel_Gr3>CsC_heat			0.132556	FruDel_Gr3>CsC_light			0.407222	FruDel_Gr3>CsC_comb
	0	FruDel_heat			0	FruDel_light			0.0348889	FruDel_comb
	0.0764444	FruHet_Gr3>CsC_heat			0.0132222	FruHet_Gr3>CsC_light			0.00144444	FruHet_Gr3>CsC_comb
	0.414111	FruDel_Gr3>CsC_heat			0.483556	FruDel_Gr3>CsC_light			0.481333	FruDel_Gr3>CsC_comb
	0	FruDel_heat			0	FruDel_light			0.008	FruDel_comb
	0	FruHet_Gr3>CsC_heat			0	FruHet_Gr3>CsC_light			0	FruHet_Gr3>CsC_comb
	0.0408889	FruDel_Gr3>CsC_heat			0	FruDel_Gr3>CsC_light			0.246111	FruDel_Gr3>CsC_comb
	0	FruDel_heat			0	FruDel_light			0.00133333	FruDel_comb
	0.000666667	FruHet_Gr3>CsC_heat			0.054	FruHet_Gr3>CsC_light			0.023	FruHet_Gr3>CsC_comb
	0.00422222	FruDel_Gr3>CsC_heat			0.206556	FruDel_Gr3>CsC_light			0.317556	FruDel_Gr3>CsC_comb
	0	FruDel_heat			0	FruDel_light			0	FruDel_comb
	0.004	FruHet_Gr3>CsC_heat			0.0295556	FruHet_Gr3>CsC_light			0.143111	FruHet_Gr3>CsC_comb
	0.00566667	FruDel_Gr3>CsC_heat			0.690667	FruDel_Gr3>CsC_light			0.753222	FruDel_Gr3>CsC_comb
	0.0167778	FruDel_heat			0.0177778	FruDel_light			0.0203333	FruDel_comb
	0	FruHet_Gr3>CsC_heat			0.00233333	FruHet_Gr3>CsC_light			0.0921111	FruHet_Gr3>CsC_comb
	0.0882222	FruDel_Gr3>CsC_heat			0.184556	FruDel_Gr3>CsC_light			0.0141111	FruDel_Gr3>CsC_comb
	0.000666667	FruDel_heat			0	FruDel_light			0.0275556	FruDel_comb
	0	FruHet_Gr3>CsC_heat			0	FruHet_Gr3>CsC_light			0	FruHet_Gr3>CsC_comb
	0.207111	FruDel_Gr3>CsC_heat			0.382667	FruDel_Gr3>CsC_light			0.361778	FruDel_Gr3>CsC_comb
	0	FruDel_heat			0.0164444	FruDel_light			0	FruDel_comb
	0.0161111	FruHet_Gr3>CsC_heat			0.0384444	FruHet_Gr3>CsC_light			0.006	FruHet_Gr3>CsC_comb
	0.132333	FruDel_Gr3>CsC_heat			0.584556	FruDel_Gr3>CsC_light			0.641667	FruDel_Gr3>CsC_comb
	0	FruDel_heat			0	FruDel_light			0.0347778	FruDel_comb
	0.0314444	FruHet_Gr3>CsC_heat			0.00055556	FruHet_Gr3>CsC_light			0.0504444	FruHet_Gr3>CsC_comb
	0.00633333	FruDel_Gr3>CsC_heat			0.373111	FruDel_Gr3>CsC_light			0.426111	FruDel_Gr3>CsC_comb
	0.117444	FruDel_heat			0	FruDel_light			0	FruDel_comb
	0	FruHet_Gr3>CsC_heat			0.0182222	FruHet_Gr3>CsC_light			0.0421111	FruHet_Gr3>CsC_comb
	0	FruDel_Gr3>CsC_heat			0.0488889	FruDel_Gr3>CsC_light			0.0834444	FruDel_Gr3>CsC_comb
	0	FruDel_heat			0	FruDel_light			0.0173333	FruDel_comb
	0.00277778	FruHet_Gr3>CsC_heat			0.146	FruHet_Gr3>CsC_light			0	FruHet_Gr3>CsC_comb
	0.00844444	FruDel_Gr3>CsC_heat			0.0533333	FruDel_Gr3>CsC_light			0.0138889	FruDel_Gr3>CsC_comb
	0.0734444	FruDel_heat			0.0134444	FruDel_light			0.0914444	FruDel_comb
	0	FruHet_Gr3>CsC_heat			0.0253333	FruHet_Gr3>CsC_light			0.169222	FruHet_Gr3>CsC_comb
	0.0156667	FruDel_Gr3>CsC_heat			0.410556	FruDel_Gr3>CsC_light			0.0295556	FruDel_Gr3>CsC_comb
	0.00566667	FruDel_heat			0	FruDel_light			0.0248889	FruDel_comb
	0	FruHet_Gr3>CsC_heat			0	FruHet_Gr3>CsC_light			0.0408889	FruHet_Gr3>CsC_comb
	0.00133333	FruDel_Gr3>CsC_heat			0.226222	FruDel_Gr3>CsC_light			0.308222	FruDel_Gr3>CsC_comb
	0.00222222	FruDel_heat			0	FruDel_light			0.0507778	FruDel_comb
	0	FruHet_Gr3>CsC_heat			0	FruHet_Gr3>CsC_light			0	FruHet_Gr3>CsC_comb
	0.171222	FruDel_Gr3>CsC_heat			0.384889	FruDel_Gr3>CsC_light			0.461667	FruDel_Gr3>CsC_comb
	0.0171111	FruDel_heat			0.0156667	FruDel_light			0.0632222	FruDel_comb
	0.0336667	FruHet_Gr3>CsC_heat			0.120111	FruHet_Gr3>CsC_light			0.0427778	FruHet_Gr3>CsC_comb
	0.0197778	FruDel_Gr3>CsC_heat			0.258444	FruDel_Gr3>CsC_light			0.100333	FruDel_Gr3>CsC_comb
	0	FruDel_heat			0	FruDel_light			0.002	FruDel_comb
	0	FruHet_Gr3>CsC_heat			0.00544444	FruHet_Gr3>CsC_light			0.0266667	FruHet_Gr3>CsC_comb
	0.00133333	FruDel_Gr3>CsC_heat			0.199111	FruDel_Gr3>CsC_light			0.366333	FruDel_Gr3>CsC_comb
	0.00711111	FruDel_heat			0	FruDel_light			0.0218889	FruDel_comb
	0	FruHet_Gr3>CsC_heat			0	FruHet_Gr3>CsC_light			0.0561111	FruHet_Gr3>CsC_comb
	0	FruDel_Gr3>CsC_heat			0.333333	FruDel_Gr3>CsC_light			0.394444	FruDel_Gr3>CsC_comb
	0.0171111	FruDel_heat			0	FruDel_light			0.00366667	FruDel_comb
	0.0126667	FruHet_Gr3>CsC_heat			0	FruHet_Gr3>CsC_light			0	FruHet_Gr3>CsC_comb
	0	FruDel_Gr3>CsC_heat			0	FruDel_Gr3>CsC_light			0.436889	FruDel_Gr3>CsC_comb
	0	FruDel_heat			0	FruDel_light			0.00855556	FruDel_comb
	0.0231111	FruHet_Gr3>CsC_heat			0.00133333	FruHet_Gr3>CsC_light			0.00066667	FruHet_Gr3>CsC_comb
	0.0136667	FruDel_Gr3>CsC_heat			0.203667	FruDel_Gr3>CsC_light			0.210222	FruDel_Gr3>CsC_comb
	0	FruDel_heat			0	FruDel_light			0	FruDel_comb
	0.00122222	FruHet_Gr3>CsC_heat			0.00466667	FruHet_Gr3>CsC_light			0	FruHet_Gr3>CsC_comb
	0.00366667	FruDel_Gr3>CsC_heat			0.00522222	FruDel_Gr3>CsC_light			0.182667	FruDel_Gr3>CsC_comb
	0.00988889	FruDel_heat			0	FruDel_light			0	FruDel_comb
	0	FruHet_Gr3>CsC_heat			0	FruHet_Gr3>CsC_light			0	FruHet_Gr3>CsC_comb
	0	FruDel_Gr3>CsC_heat			0	FruDel_Gr3>CsC_light			0.207556	FruDel_Gr3>CsC_comb
	0.0521111	FruDel_heat			0	FruDel_light			0.0215556	FruDel_comb
	0	FruHet_Gr3>CsC_heat			0	FruHet_Gr3>CsC_light			0	FruHet_Gr3>CsC_comb
	0	FruDel_Gr3>CsC_heat			0.337667	FruDel_Gr3>CsC_light			0.461556	FruDel_Gr3>CsC_comb
	0.00922222	FruDel_heat			0.00133333	FruDel_light			0.0271111	FruDel_comb
	0.151778	FruHet_Gr3>CsC_heat			0.0156667	FruHet_Gr3>CsC_light			0	FruHet_Gr3>CsC_comb
	0.0354444	FruDel_Gr3>CsC_heat			0.378	FruDel_Gr3>CsC_light			0.431111	FruDel_Gr3>CsC_comb
	0.0114444	FruDel_heat			0	FruDel_light			0.00455556	FruDel_comb
	0.0365556	FruHet_Gr3>CsC_heat			0.0736667	FruHet_Gr3>CsC_light			0.155556	FruHet_Gr3>CsC_comb
	0.134556	FruDel_Gr3>CsC_heat			0.134	FruDel_Gr3>CsC_light			0.119444	FruDel_Gr3>CsC_comb
	0	FruDel_heat			0.00133333	FruDel_light			0	FruDel_comb
	0.0216667	FruHet_Gr3>CsC_heat			0.0281111	FruHet_Gr3>CsC_light			0	FruHet_Gr3>CsC_comb
	0.00622222	FruDel_Gr3>CsC_heat			0.351444	FruDel_Gr3>CsC_light			0.437889	FruDel_Gr3>CsC_comb
	0.0136667	FruDel_heat			0	FruDel_light			0.0232222	FruDel_comb
	0	FruHet_Gr3>CsC_heat			0	FruHet_Gr3>CsC_light			0.0237778	FruHet_Gr3>CsC_comb
	0.0188889	FruDel_Gr3>CsC_heat			0.205444	FruDel_Gr3>CsC_light			0.211778	FruDel_Gr3>CsC_comb
	0.0325556	FruDel_heat			0.00322222	FruDel_light			0.137556	FruDel_comb
	0.0462222	FruHet_Gr3>CsC_heat			0.00055556	FruHet_Gr3>CsC_light			0.120111	FruHet_Gr3>CsC_comb
	0	FruDel_Gr3>CsC_heat			0.281778	FruDel_Gr3>CsC_light			0.291556	FruDel_Gr3>CsC_comb
	0	FruDel_heat			0	FruDel_light			0.0246667	FruDel_comb
	0.05	FruHet_Gr3>CsC_heat			0.029	FruHet_Gr3>CsC_light			0.0478889	FruHet_Gr3>CsC_comb
	0	FruDel_Gr3>CsC_heat			0.31	FruDel_Gr3>CsC_light			0.630333	FruDel_Gr3>CsC_comb
	0.0102222	FruDel_heat			0.0792222	FruDel_light			0.0344444	FruDel_comb

## Sheet: Figure 3J
Figure 3J
Heat	behavior_prop	stimulus		Light	behavior_prop	stimulus		Heat + Light	behavior_prop	stimulus
	0	FruDel_heat			0	FruDel_light			0	FruDel_comb
	0	FruHet_Gr3>CsC_heat			0.00633333	FruHet_Gr3>CsC_light			0.0262222	FruHet_Gr3>CsC_comb
	0.0196667	FruDel_Gr3>CsC_heat			0.154889	FruDel_Gr3>CsC_light			0.108667	FruDel_Gr3>CsC_comb
	0.0122222	FruDel_heat			0	FruDel_light			0.141	FruDel_comb
	0	FruHet_Gr3>CsC_heat			0	FruHet_Gr3>CsC_light			0	FruHet_Gr3>CsC_comb
	0	FruDel_Gr3>CsC_heat			0.0247778	FruDel_Gr3>CsC_light			0	FruDel_Gr3>CsC_comb
	0.00111111	FruDel_heat			0	FruDel_light			0	FruDel_comb
	0	FruHet_Gr3>CsC_heat			0.0297778	FruHet_Gr3>CsC_light			0.00588889	FruHet_Gr3>CsC_comb
	0	FruDel_Gr3>CsC_heat			0.104556	FruDel_Gr3>CsC_light			0.0223333	FruDel_Gr3>CsC_comb
	0.000666667	FruDel_heat			0	FruDel_light			0.00244444	FruDel_comb
	0	FruHet_Gr3>CsC_heat			0	FruHet_Gr3>CsC_light			0	FruHet_Gr3>CsC_comb
	0.101444	FruDel_Gr3>CsC_heat			0.0121111	FruDel_Gr3>CsC_light			0.0466667	FruDel_Gr3>CsC_comb
	0	FruDel_heat			0	FruDel_light			0.107333	FruDel_comb
	0	FruHet_Gr3>CsC_heat			0.00577778	FruHet_Gr3>CsC_light			0.0685556	FruHet_Gr3>CsC_comb
	0.00344444	FruDel_Gr3>CsC_heat			0.120444	FruDel_Gr3>CsC_light			0.189778	FruDel_Gr3>CsC_comb
	0	FruDel_heat			0	FruDel_light			0.00722222	FruDel_comb
	0	FruHet_Gr3>CsC_heat			0.00288889	FruHet_Gr3>CsC_light			0	FruHet_Gr3>CsC_comb
	0.00233333	FruDel_Gr3>CsC_heat			0	FruDel_Gr3>CsC_light			0.0101111	FruDel_Gr3>CsC_comb
	0	FruDel_heat			0.00666667	FruDel_light			0.002	FruDel_comb
	0	FruHet_Gr3>CsC_heat			0	FruHet_Gr3>CsC_light			0.00066667	FruHet_Gr3>CsC_comb
	0.0808889	FruDel_Gr3>CsC_heat			0.0152222	FruDel_Gr3>CsC_light			0.00455556	FruDel_Gr3>CsC_comb
	0.0136667	FruDel_heat			0	FruDel_light			0	FruDel_comb
	0.00133333	FruHet_Gr3>CsC_heat			0.0495556	FruHet_Gr3>CsC_light			0.00377778	FruHet_Gr3>CsC_comb
	0.00288889	FruDel_Gr3>CsC_heat			0.506111	FruDel_Gr3>CsC_light			0.402	FruDel_Gr3>CsC_comb
	0.0275556	FruDel_heat			0	FruDel_light			0.00166667	FruDel_comb
	0	FruHet_Gr3>CsC_heat			0.0367778	FruHet_Gr3>CsC_light			0.0213333	FruHet_Gr3>CsC_comb
	0.113222	FruDel_Gr3>CsC_heat			0.0568889	FruDel_Gr3>CsC_light			0.110111	FruDel_Gr3>CsC_comb
	0	FruDel_heat			0.00088889	FruDel_light			0	FruDel_comb
	0.055	FruHet_Gr3>CsC_heat			0	FruHet_Gr3>CsC_light			0	FruHet_Gr3>CsC_comb
	0.00166667	FruDel_Gr3>CsC_heat			0.0183333	FruDel_Gr3>CsC_light			0.0987778	FruDel_Gr3>CsC_comb
	0.003	FruDel_heat			0	FruDel_light			0	FruDel_comb
	0.014	FruHet_Gr3>CsC_heat			0.031	FruHet_Gr3>CsC_light			0.00244444	FruHet_Gr3>CsC_comb
	0.0422222	FruDel_Gr3>CsC_heat			0.00066667	FruDel_Gr3>CsC_light			0	FruDel_Gr3>CsC_comb
	0	FruDel_heat			0	FruDel_light			0.0305556	FruDel_comb
	0.0653333	FruHet_Gr3>CsC_heat			0.0565556	FruHet_Gr3>CsC_light			0.00566667	FruHet_Gr3>CsC_comb
	0.086	FruDel_Gr3>CsC_heat			0.168556	FruDel_Gr3>CsC_light			0.0901111	FruDel_Gr3>CsC_comb
	0	FruDel_heat			0	FruDel_light			0	FruDel_comb
	0.0161111	FruHet_Gr3>CsC_heat			0.125222	FruHet_Gr3>CsC_light			0.0183333	FruHet_Gr3>CsC_comb
	0.0107778	FruDel_Gr3>CsC_heat			0	FruDel_Gr3>CsC_light			0.0167778	FruDel_Gr3>CsC_comb
	0	FruDel_heat			0	FruDel_light			0	FruDel_comb
	0.0137778	FruHet_Gr3>CsC_heat			0.00944444	FruHet_Gr3>CsC_light			0.00911111	FruHet_Gr3>CsC_comb
	0.000777778	FruDel_Gr3>CsC_heat			0.104444	FruDel_Gr3>CsC_light			0	FruDel_Gr3>CsC_comb
	0	FruDel_heat			0.0181111	FruDel_light			0.005	FruDel_comb
	0	FruHet_Gr3>CsC_heat			0.002	FruHet_Gr3>CsC_light			0.00055556	FruHet_Gr3>CsC_comb
	0	FruDel_Gr3>CsC_heat			0.21	FruDel_Gr3>CsC_light			0.135222	FruDel_Gr3>CsC_comb
	0	FruDel_heat			0	FruDel_light			0.0224444	FruDel_comb
	0	FruHet_Gr3>CsC_heat			0.0232222	FruHet_Gr3>CsC_light			0.00088889	FruHet_Gr3>CsC_comb
	0.00688889	FruDel_Gr3>CsC_heat			0	FruDel_Gr3>CsC_light			0	FruDel_Gr3>CsC_comb
	0	FruDel_heat			0	FruDel_light			0	FruDel_comb
	0.000777778	FruHet_Gr3>CsC_heat			0.00166667	FruHet_Gr3>CsC_light			0	FruHet_Gr3>CsC_comb
	0	FruDel_Gr3>CsC_heat			0.00133333	FruDel_Gr3>CsC_light			0	FruDel_Gr3>CsC_comb
	0	FruDel_heat			0	FruDel_light			0.015	FruDel_comb
	0	FruHet_Gr3>CsC_heat			0	FruHet_Gr3>CsC_light			0	FruHet_Gr3>CsC_comb
	0	FruDel_Gr3>CsC_heat			0.013	FruDel_Gr3>CsC_light			0	FruDel_Gr3>CsC_comb
	0.00533333	FruDel_heat			0.00133333	FruDel_light			0	FruDel_comb
	0	FruHet_Gr3>CsC_heat			0.00488889	FruHet_Gr3>CsC_light			0	FruHet_Gr3>CsC_comb
	0.0127778	FruDel_Gr3>CsC_heat			0.0183333	FruDel_Gr3>CsC_light			0	FruDel_Gr3>CsC_comb
	0.00266667	FruDel_heat			0	FruDel_light			0.0268889	FruDel_comb
	0.0156667	FruHet_Gr3>CsC_heat			0.0456667	FruHet_Gr3>CsC_light			0.00455556	FruHet_Gr3>CsC_comb
	0	FruDel_Gr3>CsC_heat			0.0178889	FruDel_Gr3>CsC_light			0.00411111	FruDel_Gr3>CsC_comb
	0	FruDel_heat			0	FruDel_light			0	FruDel_comb
	0	FruHet_Gr3>CsC_heat			0.0336667	FruHet_Gr3>CsC_light			0.0145556	FruHet_Gr3>CsC_comb
	0.0802222	FruDel_Gr3>CsC_heat			0.076	FruDel_Gr3>CsC_light			0.0645556	FruDel_Gr3>CsC_comb
	0	FruDel_heat			0.0477778	FruDel_light			0.047	FruDel_comb
	0.0336667	FruHet_Gr3>CsC_heat			0.16	FruHet_Gr3>CsC_light			0.0116667	FruHet_Gr3>CsC_comb
	0.00777778	FruDel_Gr3>CsC_heat			0.0534444	FruDel_Gr3>CsC_light			0.00766667	FruDel_Gr3>CsC_comb
	0.00933333	FruDel_heat			0.0845556	FruDel_light			0	FruDel_comb
	0	FruHet_Gr3>CsC_heat			0	FruHet_Gr3>CsC_light			0	FruHet_Gr3>CsC_comb
	0	FruDel_Gr3>CsC_heat			0.0397778	FruDel_Gr3>CsC_light			0	FruDel_Gr3>CsC_comb
	0.00655556	FruDel_heat			0	FruDel_light			0.0141111	FruDel_comb
	0	FruHet_Gr3>CsC_heat			0	FruHet_Gr3>CsC_light			0	FruHet_Gr3>CsC_comb
	0.0294444	FruDel_Gr3>CsC_heat			0.133444	FruDel_Gr3>CsC_light			0.125556	FruDel_Gr3>CsC_comb
	0.0236667	FruDel_heat			0	FruDel_light			0	FruDel_comb
	0	FruHet_Gr3>CsC_heat			0.0323333	FruHet_Gr3>CsC_light			0	FruHet_Gr3>CsC_comb
	0	FruDel_Gr3>CsC_heat			0.00822222	FruDel_Gr3>CsC_light			0	FruDel_Gr3>CsC_comb
	0.0165556	FruDel_heat			0.0287778	FruDel_light			0.0421111	FruDel_comb
	0.284	FruHet_Gr3>CsC_heat			0	FruHet_Gr3>CsC_light			0.00733333	FruHet_Gr3>CsC_comb
	0	FruDel_Gr3>CsC_heat			0	FruDel_Gr3>CsC_light			0.00477778	FruDel_Gr3>CsC_comb
	0	FruDel_heat			0	FruDel_light			0	FruDel_comb
	0.00788889	FruHet_Gr3>CsC_heat			0.0201111	FruHet_Gr3>CsC_light			0.00211111	FruHet_Gr3>CsC_comb
	0.0175556	FruDel_Gr3>CsC_heat			0.00666667	FruDel_Gr3>CsC_light			0.0435556	FruDel_Gr3>CsC_comb
	0.276444	FruDel_heat			0	FruDel_light			0.00077778	FruDel_comb
	0	FruHet_Gr3>CsC_heat			0.0376667	FruHet_Gr3>CsC_light			0.00733333	FruHet_Gr3>CsC_comb
	0.00677778	FruDel_Gr3>CsC_heat			0.139889	FruDel_Gr3>CsC_light			0.0468889	FruDel_Gr3>CsC_comb
	0	FruDel_heat			0	FruDel_light			0.0844444	FruDel_comb
	0	FruHet_Gr3>CsC_heat			0	FruHet_Gr3>CsC_light			0	FruHet_Gr3>CsC_comb
	0.307111	FruDel_Gr3>CsC_heat			0.275333	FruDel_Gr3>CsC_light			0.289111	FruDel_Gr3>CsC_comb
	0	FruDel_heat			0	FruDel_light			0.0187778	FruDel_comb
	0	FruHet_Gr3>CsC_heat			0	FruHet_Gr3>CsC_light			0.0812222	FruHet_Gr3>CsC_comb
	0.0264444	FruDel_Gr3>CsC_heat			0.362556	FruDel_Gr3>CsC_light			0.240222	FruDel_Gr3>CsC_comb
	0	FruDel_heat			0	FruDel_light			0.00066667	FruDel_comb
	0	FruHet_Gr3>CsC_heat			0	FruHet_Gr3>CsC_light			0.0194444	FruHet_Gr3>CsC_comb
	0	FruDel_Gr3>CsC_heat			0.110222	FruDel_Gr3>CsC_light			0.109222	FruDel_Gr3>CsC_comb
	0.131778	FruDel_heat			0	FruDel_light			0	FruDel_comb
	0.0404444	FruHet_Gr3>CsC_heat			0.0148889	FruHet_Gr3>CsC_light			0.0125556	FruHet_Gr3>CsC_comb
	0	FruDel_Gr3>CsC_heat			0.186222	FruDel_Gr3>CsC_light			0.304889	FruDel_Gr3>CsC_comb
	0	FruDel_heat			0.264889	FruDel_light			0.023	FruDel_comb
	0	FruHet_Gr3>CsC_heat			0	FruHet_Gr3>CsC_light			0	FruHet_Gr3>CsC_comb
	0.0128889	FruDel_Gr3>CsC_heat			0.0112222	FruDel_Gr3>CsC_light			0	FruDel_Gr3>CsC_comb
	0	FruDel_heat			0	FruDel_light			0	FruDel_comb
	0	FruHet_Gr3>CsC_heat			0	FruHet_Gr3>CsC_light			0	FruHet_Gr3>CsC_comb
	0	FruDel_Gr3>CsC_heat			0.275222	FruDel_Gr3>CsC_light			0.168	FruDel_Gr3>CsC_comb
	0.00611111	FruDel_heat			0	FruDel_light			0.00333333	FruDel_comb
	0.0195556	FruHet_Gr3>CsC_heat			0	FruHet_Gr3>CsC_light			0.00288889	FruHet_Gr3>CsC_comb
	0.007	FruDel_Gr3>CsC_heat			0.0281111	FruDel_Gr3>CsC_light			0.219333	FruDel_Gr3>CsC_comb
	0.012	FruDel_heat			0.0353333	FruDel_light			0.201889	FruDel_comb
	0	FruHet_Gr3>CsC_heat			0	FruHet_Gr3>CsC_light			0	FruHet_Gr3>CsC_comb
	0.00366667	FruDel_Gr3>CsC_heat			0.192444	FruDel_Gr3>CsC_light			0.0138889	FruDel_Gr3>CsC_comb
	0.00711111	FruDel_heat			0.168667	FruDel_light			0.00388889	FruDel_comb
	0.00322222	FruHet_Gr3>CsC_heat			0.0126667	FruHet_Gr3>CsC_light			0.0747778	FruHet_Gr3>CsC_comb
	0.0126667	FruDel_Gr3>CsC_heat			0.0131111	FruDel_Gr3>CsC_light			0.0214444	FruDel_Gr3>CsC_comb
	0.0136667	FruDel_heat			0.0286667	FruDel_light			0	FruDel_comb
	0.00188889	FruHet_Gr3>CsC_heat			0	FruHet_Gr3>CsC_light			0.0131111	FruHet_Gr3>CsC_comb
	0	FruDel_Gr3>CsC_heat			0.036	FruDel_Gr3>CsC_light			0.337889	FruDel_Gr3>CsC_comb
	0	FruDel_heat			0	FruDel_light			0.00188889	FruDel_comb
	0	FruHet_Gr3>CsC_heat			0.00433333	FruHet_Gr3>CsC_light			0.00222222	FruHet_Gr3>CsC_comb
	0.0161111	FruDel_Gr3>CsC_heat			0.108556	FruDel_Gr3>CsC_light			0	FruDel_Gr3>CsC_comb
	0	FruDel_heat			0	FruDel_light			0	FruDel_comb
	0.00566667	FruHet_Gr3>CsC_heat			0	FruHet_Gr3>CsC_light			0.0558889	FruHet_Gr3>CsC_comb
	0.0723333	FruDel_Gr3>CsC_heat			0.023	FruDel_Gr3>CsC_light			0.167444	FruDel_Gr3>CsC_comb
	0.000555556	FruDel_heat			0	FruDel_light			0.0133333	FruDel_comb
	0	FruHet_Gr3>CsC_heat			0	FruHet_Gr3>CsC_light			0.0201111	FruHet_Gr3>CsC_comb
	0.0118889	FruDel_Gr3>CsC_heat			0.0782222	FruDel_Gr3>CsC_light			0.178222	FruDel_Gr3>CsC_comb
	0	FruDel_heat			0	FruDel_light			0	FruDel_comb
	0.122667	FruHet_Gr3>CsC_heat			0	FruHet_Gr3>CsC_light			0	FruHet_Gr3>CsC_comb
	0	FruDel_Gr3>CsC_heat			0	FruDel_Gr3>CsC_light			0	FruDel_Gr3>CsC_comb
	0	FruDel_heat			0	FruDel_light			0	FruDel_comb
	0	FruHet_Gr3>CsC_heat			0.0393333	FruHet_Gr3>CsC_light			0.00755556	FruHet_Gr3>CsC_comb
	0.0186667	FruDel_Gr3>CsC_heat			0.0961111	FruDel_Gr3>CsC_light			0.291222	FruDel_Gr3>CsC_comb
	0	FruDel_heat			0.0113333	FruDel_light			0	FruDel_comb
	0	FruHet_Gr3>CsC_heat			0	FruHet_Gr3>CsC_light			0.00466667	FruHet_Gr3>CsC_comb
	0	FruDel_Gr3>CsC_heat			0	FruDel_Gr3>CsC_light			0.108333	FruDel_Gr3>CsC_comb
	0.0138889	FruDel_heat			0	FruDel_light			0	FruDel_comb
	0.00533333	FruHet_Gr3>CsC_heat			0	FruHet_Gr3>CsC_light			0.036	FruHet_Gr3>CsC_comb
	0.186778	FruDel_Gr3>CsC_heat			0.379556	FruDel_Gr3>CsC_light			0.351889	FruDel_Gr3>CsC_comb
	0	FruDel_heat			0	FruDel_light			0.008	FruDel_comb
	0.00555556	FruHet_Gr3>CsC_heat			0.146556	FruHet_Gr3>CsC_light			0.0438889	FruHet_Gr3>CsC_comb
	0.0122222	FruDel_Gr3>CsC_heat			0.119222	FruDel_Gr3>CsC_light			0.0993333	FruDel_Gr3>CsC_comb
	0.0394444	FruDel_heat			0	FruDel_light			0.022	FruDel_comb
	0	FruHet_Gr3>CsC_heat			0.120333	FruHet_Gr3>CsC_light			0	FruHet_Gr3>CsC_comb
	0	FruDel_Gr3>CsC_heat			0	FruDel_Gr3>CsC_light			0.00688889	FruDel_Gr3>CsC_comb
	0.0618889	FruDel_heat			0	FruDel_light			0.0505556	FruDel_comb
	0	FruHet_Gr3>CsC_heat			0.00955556	FruHet_Gr3>CsC_light			0.0124444	FruHet_Gr3>CsC_comb
	0	FruDel_Gr3>CsC_heat			0.069	FruDel_Gr3>CsC_light			0.0568889	FruDel_Gr3>CsC_comb
	0.00544444	FruDel_heat			0.00888889	FruDel_light			0.0458889	FruDel_comb
	0	FruHet_Gr3>CsC_heat			0	FruHet_Gr3>CsC_light			0	FruHet_Gr3>CsC_comb
	0.427889	FruDel_Gr3>CsC_heat			0.476889	FruDel_Gr3>CsC_light			0.565222	FruDel_Gr3>CsC_comb
	0	FruDel_heat			0.002	FruDel_light			0	FruDel_comb
	0.115889	FruHet_Gr3>CsC_heat			0	FruHet_Gr3>CsC_light			0	FruHet_Gr3>CsC_comb
	0	FruDel_Gr3>CsC_heat			0.0281111	FruDel_Gr3>CsC_light			0.0106667	FruDel_Gr3>CsC_comb
	0.0532222	FruDel_heat			0.0484444	FruDel_light			0.00433333	FruDel_comb
	0	FruHet_Gr3>CsC_heat			0	FruHet_Gr3>CsC_light			0	FruHet_Gr3>CsC_comb
	0.0528889	FruDel_Gr3>CsC_heat			0.162111	FruDel_Gr3>CsC_light			0.151667	FruDel_Gr3>CsC_comb
	0.0162222	FruDel_heat			0.0274444	FruDel_light			0.0627778	FruDel_comb
	0.0264444	FruHet_Gr3>CsC_heat			0.00488889	FruHet_Gr3>CsC_light			0.0732222	FruHet_Gr3>CsC_comb
	0.232444	FruDel_Gr3>CsC_heat			0.00133333	FruDel_Gr3>CsC_light			0.265	FruDel_Gr3>CsC_comb
	0	FruDel_heat			0	FruDel_light			0.004	FruDel_comb
	0.00655556	FruHet_Gr3>CsC_heat			0	FruHet_Gr3>CsC_light			0.00111111	FruHet_Gr3>CsC_comb
	0.00377778	FruDel_Gr3>CsC_heat			0.0913333	FruDel_Gr3>CsC_light			0.171	FruDel_Gr3>CsC_comb
	0.000555556	FruDel_heat			0.00055556	FruDel_light			0.008	FruDel_comb
	0	FruHet_Gr3>CsC_heat			0	FruHet_Gr3>CsC_light			0.017	FruHet_Gr3>CsC_comb
	0.0416667	FruDel_Gr3>CsC_heat			0.024	FruDel_Gr3>CsC_light			0.0355556	FruDel_Gr3>CsC_comb
	0	FruDel_heat			0	FruDel_light			0	FruDel_comb
	0	FruHet_Gr3>CsC_heat			0	FruHet_Gr3>CsC_light			0	FruHet_Gr3>CsC_comb
	0.111778	FruDel_Gr3>CsC_heat			0.108111	FruDel_Gr3>CsC_light			0.0377778	FruDel_Gr3>CsC_comb
	0.00288889	FruDel_heat			0.0687778	FruDel_light			0.0181111	FruDel_comb
	0	FruHet_Gr3>CsC_heat			0.00166667	FruHet_Gr3>CsC_light			0	FruHet_Gr3>CsC_comb
	0.0362222	FruDel_Gr3>CsC_heat			0.00722222	FruDel_Gr3>CsC_light			0.0577778	FruDel_Gr3>CsC_comb
	0.0126667	FruDel_heat			0.00122222	FruDel_light			0	FruDel_comb
	0	FruHet_Gr3>CsC_heat			0.00122222	FruHet_Gr3>CsC_light			0.00855556	FruHet_Gr3>CsC_comb
	0.174111	FruDel_Gr3>CsC_heat			0.165	FruDel_Gr3>CsC_light			0.268222	FruDel_Gr3>CsC_comb
	0.00933333	FruDel_heat			0.00966667	FruDel_light			0.0356667	FruDel_comb
	0	FruHet_Gr3>CsC_heat			0	FruHet_Gr3>CsC_light			0.00588889	FruHet_Gr3>CsC_comb
	0	FruDel_Gr3>CsC_heat			0.00266667	FruDel_Gr3>CsC_light			0.0524444	FruDel_Gr3>CsC_comb
	0.00822222	FruDel_heat			0	FruDel_light			0	FruDel_comb
	0.015	FruHet_Gr3>CsC_heat			0.00855556	FruHet_Gr3>CsC_light			0.005	FruHet_Gr3>CsC_comb
	0.0496667	FruDel_Gr3>CsC_heat			0.0784444	FruDel_Gr3>CsC_light			0.0234444	FruDel_Gr3>CsC_comb
	0.0423333	FruDel_heat			0	FruDel_light			0.00177778	FruDel_comb
	0.0457778	FruHet_Gr3>CsC_heat			0.0113333	FruHet_Gr3>CsC_light			0.0121111	FruHet_Gr3>CsC_comb
	0.011	FruDel_Gr3>CsC_heat			0.128444	FruDel_Gr3>CsC_light			0.106333	FruDel_Gr3>CsC_comb
	0.0116667	FruDel_heat			0	FruDel_light			0.0164444	FruDel_comb
	0.003	FruHet_Gr3>CsC_heat			0.0347778	FruHet_Gr3>CsC_light			0.091	FruHet_Gr3>CsC_comb
	0.006	FruDel_Gr3>CsC_heat			0.0541111	FruDel_Gr3>CsC_light			0.0367778	FruDel_Gr3>CsC_comb
	0.000666667	FruDel_heat			0	FruDel_light			0	FruDel_comb
	0.00944444	FruHet_Gr3>CsC_heat			0	FruHet_Gr3>CsC_light			0.0103333	FruHet_Gr3>CsC_comb
	0.00188889	FruDel_Gr3>CsC_heat			0.0906667	FruDel_Gr3>CsC_light			0.0707778	FruDel_Gr3>CsC_comb
	0.01	FruDel_heat			0.0115556	FruDel_light			0.0213333	FruDel_comb
	0.000555556	FruHet_Gr3>CsC_heat			0.00155556	FruHet_Gr3>CsC_light			0	FruHet_Gr3>CsC_comb
	0.00377778	FruDel_Gr3>CsC_heat			0.0665556	FruDel_Gr3>CsC_light			0.0437778	FruDel_Gr3>CsC_comb
	0.0106667	FruDel_heat			0	FruDel_light			0.00588889	FruDel_comb
	0.003	FruHet_Gr3>CsC_heat			0	FruHet_Gr3>CsC_light			0.0178889	FruHet_Gr3>CsC_comb
	0.106778	FruDel_Gr3>CsC_heat			0.221	FruDel_Gr3>CsC_light			0.151556	FruDel_Gr3>CsC_comb
	0.00811111	FruDel_heat			0	FruDel_light			0.008	FruDel_comb
	0.00366667	FruHet_Gr3>CsC_heat			0.0312222	FruHet_Gr3>CsC_light			0.0292222	FruHet_Gr3>CsC_comb
	0	FruDel_Gr3>CsC_heat			0.0766667	FruDel_Gr3>CsC_light			0.002	FruDel_Gr3>CsC_comb
	0.00177778	FruDel_heat			0.00344444	FruDel_light			0.106778	FruDel_comb
	0.0122222	FruHet_Gr3>CsC_heat			0.00266667	FruHet_Gr3>CsC_light			0.00488889	FruHet_Gr3>CsC_comb
	0	FruDel_Gr3>CsC_heat			0	FruDel_Gr3>CsC_light			0.0152222	FruDel_Gr3>CsC_comb
	0.00111111	FruDel_heat			0	FruDel_light			0	FruDel_comb
	0.00944444	FruHet_Gr3>CsC_heat			0.00155556	FruHet_Gr3>CsC_light			0.0228889	FruHet_Gr3>CsC_comb
	0.000555556	FruDel_Gr3>CsC_heat			0.0447778	FruDel_Gr3>CsC_light			0.0732222	FruDel_Gr3>CsC_comb
	0.0197778	FruDel_heat			0	FruDel_light			0.0655556	FruDel_comb
	0.00433333	FruHet_Gr3>CsC_heat			0.121556	FruHet_Gr3>CsC_light			0.05	FruHet_Gr3>CsC_comb
	0.00833333	FruDel_Gr3>CsC_heat			0	FruDel_Gr3>CsC_light			0.0532222	FruDel_Gr3>CsC_comb
	0.00322222	FruDel_heat			0.00155556	FruDel_light			0.0131111	FruDel_comb
	0.00888889	FruHet_Gr3>CsC_heat			0.0471111	FruHet_Gr3>CsC_light			0.0324444	FruHet_Gr3>CsC_comb
	0.00511111	FruDel_Gr3>CsC_heat			0.0552222	FruDel_Gr3>CsC_light			0.0137778	FruDel_Gr3>CsC_comb
	0.000666667	FruDel_heat			0	FruDel_light			0	FruDel_comb
	0	FruHet_Gr3>CsC_heat			0	FruHet_Gr3>CsC_light			0.00355556	FruHet_Gr3>CsC_comb
	0.0574444	FruDel_Gr3>CsC_heat			0.0358889	FruDel_Gr3>CsC_light			0.126778	FruDel_Gr3>CsC_comb
	0	FruDel_heat			0	FruDel_light			0.00255556	FruDel_comb
	0.0253333	FruHet_Gr3>CsC_heat			0.0104444	FruHet_Gr3>CsC_light			0.0431111	FruHet_Gr3>CsC_comb
	0.185111	FruDel_Gr3>CsC_heat			0.136889	FruDel_Gr3>CsC_light			0.130889	FruDel_Gr3>CsC_comb
	0	FruDel_heat			0	FruDel_light			0	FruDel_comb
	0	FruHet_Gr3>CsC_heat			0	FruHet_Gr3>CsC_light			0	FruHet_Gr3>CsC_comb
	0.00788889	FruDel_Gr3>CsC_heat			0	FruDel_Gr3>CsC_light			0.0366667	FruDel_Gr3>CsC_comb
	0.000777778	FruDel_heat			0	FruDel_light			0.00155556	FruDel_comb
	0.00577778	FruHet_Gr3>CsC_heat			0.0385556	FruHet_Gr3>CsC_light			0.0168889	FruHet_Gr3>CsC_comb
	0.00422222	FruDel_Gr3>CsC_heat			0.115556	FruDel_Gr3>CsC_light			0.0525556	FruDel_Gr3>CsC_comb
	0	FruDel_heat			0	FruDel_light			0	FruDel_comb
	0.00655556	FruHet_Gr3>CsC_heat			0.00277778	FruHet_Gr3>CsC_light			0.0214444	FruHet_Gr3>CsC_comb
	0.00633333	FruDel_Gr3>CsC_heat			0.204778	FruDel_Gr3>CsC_light			0.309333	FruDel_Gr3>CsC_comb
	0.0497778	FruDel_heat			0.0151111	FruDel_light			0.0177778	FruDel_comb
	0	FruHet_Gr3>CsC_heat			0	FruHet_Gr3>CsC_light			0.0181111	FruHet_Gr3>CsC_comb
	0.0346667	FruDel_Gr3>CsC_heat			0.0704444	FruDel_Gr3>CsC_light			0.00066667	FruDel_Gr3>CsC_comb
	0.000555556	FruDel_heat			0.00066667	FruDel_light			0.0234444	FruDel_comb
	0	FruHet_Gr3>CsC_heat			0	FruHet_Gr3>CsC_light			0	FruHet_Gr3>CsC_comb
	0.072	FruDel_Gr3>CsC_heat			0.197444	FruDel_Gr3>CsC_light			0.16	FruDel_Gr3>CsC_comb
	0	FruDel_heat			0	FruDel_light			0	FruDel_comb
	0.00455556	FruHet_Gr3>CsC_heat			0.00388889	FruHet_Gr3>CsC_light			0	FruHet_Gr3>CsC_comb
	0.0452222	FruDel_Gr3>CsC_heat			0.124333	FruDel_Gr3>CsC_light			0.190333	FruDel_Gr3>CsC_comb
	0	FruDel_heat			0	FruDel_light			0.0196667	FruDel_comb
	0.0108889	FruHet_Gr3>CsC_heat			0	FruHet_Gr3>CsC_light			0.0472222	FruHet_Gr3>CsC_comb
	0.00377778	FruDel_Gr3>CsC_heat			0.0577778	FruDel_Gr3>CsC_light			0.100333	FruDel_Gr3>CsC_comb
	0.0521111	FruDel_heat			0	FruDel_light			0	FruDel_comb
	0.00622222	FruHet_Gr3>CsC_heat			0.00677778	FruHet_Gr3>CsC_light			0.0255556	FruHet_Gr3>CsC_comb
	0	FruDel_Gr3>CsC_heat			0.00344444	FruDel_Gr3>CsC_light			0.0103333	FruDel_Gr3>CsC_comb
	0.00666667	FruDel_heat			0	FruDel_light			0.00222222	FruDel_comb
	0.0384444	FruHet_Gr3>CsC_heat			0.0443333	FruHet_Gr3>CsC_light			0.00677778	FruHet_Gr3>CsC_comb
	0.0127778	FruDel_Gr3>CsC_heat			0.0114444	FruDel_Gr3>CsC_light			0.0201111	FruDel_Gr3>CsC_comb
	0.0185556	FruDel_heat			0	FruDel_light			0.0363333	FruDel_comb
	0	FruHet_Gr3>CsC_heat			0.0262222	FruHet_Gr3>CsC_light			0.052	FruHet_Gr3>CsC_comb
	0	FruDel_Gr3>CsC_heat			0.0112222	FruDel_Gr3>CsC_light			0.00577778	FruDel_Gr3>CsC_comb
	0.0127778	FruDel_heat			0	FruDel_light			0.0235556	FruDel_comb
	0.00155556	FruHet_Gr3>CsC_heat			0	FruHet_Gr3>CsC_light			0.00188889	FruHet_Gr3>CsC_comb
	0.000777778	FruDel_Gr3>CsC_heat			0.123444	FruDel_Gr3>CsC_light			0.160667	FruDel_Gr3>CsC_comb
	0.001	FruDel_heat			0	FruDel_light			0.0231111	FruDel_comb
	0.0272222	FruHet_Gr3>CsC_heat			0.00055556	FruHet_Gr3>CsC_light			0.00366667	FruHet_Gr3>CsC_comb
	0.0955556	FruDel_Gr3>CsC_heat			0.121111	FruDel_Gr3>CsC_light			0.128444	FruDel_Gr3>CsC_comb
	0.003	FruDel_heat			0.0184444	FruDel_light			0.0155556	FruDel_comb
	0.00477778	FruHet_Gr3>CsC_heat			0.0165556	FruHet_Gr3>CsC_light			0.00144444	FruHet_Gr3>CsC_comb
	0	FruDel_Gr3>CsC_heat			0.0637778	FruDel_Gr3>CsC_light			0.0258889	FruDel_Gr3>CsC_comb
	0	FruDel_heat			0	FruDel_light			0	FruDel_comb
	0	FruHet_Gr3>CsC_heat			0.003	FruHet_Gr3>CsC_light			0.00666667	FruHet_Gr3>CsC_comb
	0.00133333	FruDel_Gr3>CsC_heat			0.0711111	FruDel_Gr3>CsC_light			0.180444	FruDel_Gr3>CsC_comb
	0.014	FruDel_heat			0	FruDel_light			0.00155556	FruDel_comb
	0	FruHet_Gr3>CsC_heat			0	FruHet_Gr3>CsC_light			0.00144444	FruHet_Gr3>CsC_comb
	0.00288889	FruDel_Gr3>CsC_heat			0.155333	FruDel_Gr3>CsC_light			0.142778	FruDel_Gr3>CsC_comb
	0.000777778	FruDel_heat			0	FruDel_light			0	FruDel_comb
	0.031	FruHet_Gr3>CsC_heat			0	FruHet_Gr3>CsC_light			0.00455556	FruHet_Gr3>CsC_comb
	0	FruDel_Gr3>CsC_heat			0	FruDel_Gr3>CsC_light			0.221111	FruDel_Gr3>CsC_comb
	0.0111111	FruDel_heat			0	FruDel_light			0.00633333	FruDel_comb
	0.0344444	FruHet_Gr3>CsC_heat			0	FruHet_Gr3>CsC_light			0	FruHet_Gr3>CsC_comb
	0.00622222	FruDel_Gr3>CsC_heat			0.0767778	FruDel_Gr3>CsC_light			0.107667	FruDel_Gr3>CsC_comb
	0.00144444	FruDel_heat			0	FruDel_light			0	FruDel_comb
	0.0298889	FruHet_Gr3>CsC_heat			0.00188889	FruHet_Gr3>CsC_light			0	FruHet_Gr3>CsC_comb
	0	FruDel_Gr3>CsC_heat			0	FruDel_Gr3>CsC_light			0.0217778	FruDel_Gr3>CsC_comb
	0.005	FruDel_heat			0	FruDel_light			0	FruDel_comb
	0.00311111	FruHet_Gr3>CsC_heat			0	FruHet_Gr3>CsC_light			0	FruHet_Gr3>CsC_comb
	0.006	FruDel_Gr3>CsC_heat			0	FruDel_Gr3>CsC_light			0.026	FruDel_Gr3>CsC_comb
	0.0288889	FruDel_heat			0	FruDel_light			0.00088889	FruDel_comb
	0.00166667	FruHet_Gr3>CsC_heat			0	FruHet_Gr3>CsC_light			0	FruHet_Gr3>CsC_comb
	0	FruDel_Gr3>CsC_heat			0.134556	FruDel_Gr3>CsC_light			0.229222	FruDel_Gr3>CsC_comb
	0.00222222	FruDel_heat			0	FruDel_light			0.00866667	FruDel_comb
	0.0503333	FruHet_Gr3>CsC_heat			0.0256667	FruHet_Gr3>CsC_light			0	FruHet_Gr3>CsC_comb
	0.0177778	FruDel_Gr3>CsC_heat			0.193333	FruDel_Gr3>CsC_light			0.248222	FruDel_Gr3>CsC_comb
	0.00222222	FruDel_heat			0	FruDel_light			0	FruDel_comb
	0.0253333	FruHet_Gr3>CsC_heat			0.0547778	FruHet_Gr3>CsC_light			0.083	FruHet_Gr3>CsC_comb
	0.0156667	FruDel_Gr3>CsC_heat			0.0425556	FruDel_Gr3>CsC_light			0.0202222	FruDel_Gr3>CsC_comb
	0	FruDel_heat			0.00155556	FruDel_light			0.00177778	FruDel_comb
	0.00722222	FruHet_Gr3>CsC_heat			0.00366667	FruHet_Gr3>CsC_light			0	FruHet_Gr3>CsC_comb
	0.00422222	FruDel_Gr3>CsC_heat			0.172444	FruDel_Gr3>CsC_light			0.225778	FruDel_Gr3>CsC_comb
	0.0106667	FruDel_heat			0	FruDel_light			0.0126667	FruDel_comb
	0	FruHet_Gr3>CsC_heat			0	FruHet_Gr3>CsC_light			0	FruHet_Gr3>CsC_comb
	0.00477778	FruDel_Gr3>CsC_heat			0.143667	FruDel_Gr3>CsC_light			0.116	FruDel_Gr3>CsC_comb
	0.0186667	FruDel_heat			0.007	FruDel_light			0.019	FruDel_comb
	0.00811111	FruHet_Gr3>CsC_heat			0	FruHet_Gr3>CsC_light			0.0184444	FruHet_Gr3>CsC_comb
	0	FruDel_Gr3>CsC_heat			0.141111	FruDel_Gr3>CsC_light			0.101222	FruDel_Gr3>CsC_comb
	0.00344444	FruDel_heat			0	FruDel_light			0.0175556	FruDel_comb
	0.0184444	FruHet_Gr3>CsC_heat			0.00055556	FruHet_Gr3>CsC_light			0.0246667	FruHet_Gr3>CsC_comb
	0	FruDel_Gr3>CsC_heat			0.113556	FruDel_Gr3>CsC_light			0.246444	FruDel_Gr3>CsC_comb
	0.000888889	FruDel_heat			0.0371111	FruDel_light			0	FruDel_comb

[truncated: 6 more sheets: Figure 3 FS1A, Figure 3 FS1B, Figure 3 FS1C, Figure 3 FS1D, Figure 3 FS1E, StatisticalTests]
