# Supplementary material for: A persistent behavioral state enables sustained predation of humans by mosquitoes
Source: eLife. 2022 May 12;11:e76663. doi: 10.7554/eLife.76663 (PMC9154740; doi:10.7554/eLife.76663)
Supplement: Figure 4—source data 1. [file elife-76663-fig4-data1.xlsx]

## Sheet: Figure 4B
Figure 4B
mosquito	behavior_prop	stimulus
0	0.155222	heatonly
0	0.214667	lightonly
0	0.1555	-1min
0	0.264389	-15s
0	0.265944	simultaneous
0	0.398056	+15s
0	0.174889	+1min
1	0.0969444	heatonly
1	0.337111	lightonly
1	0.1455	-1min
1	0.1765	-15s
1	0.186167	simultaneous
1	0.323611	+15s
1	0.133	+1min
2	0.053	heatonly
2	0.0444444	lightonly
2	0.0117778	-1min
2	0.00855556	-15s
2	0.131	simultaneous
2	0.0589444	+15s
2	0.0510556	+1min
3	0.116944	heatonly
3	0.138222	lightonly
3	0.101333	-1min
3	0.124722	-15s
3	0.126333	simultaneous
3	0.250167	+15s
3	0.0787778	+1min
4	0.0745556	heatonly
4	0.297333	lightonly
4	0.152722	-1min
4	0.140056	-15s
4	0.132278	simultaneous
4	0.137	+15s
4	0.220833	+1min
5	0.0498889	heatonly
5	0.216611	lightonly
5	0.173944	-1min
5	0.144667	-15s
5	0.0573333	simultaneous
5	0.199111	+15s
5	0.151222	+1min
6	0.237222	heatonly
6	0.352278	lightonly
6	0.168222	-1min
6	0.296389	-15s
6	0.173667	simultaneous
6	0.439556	+15s
6	0.370667	+1min
7	0.0967222	heatonly
7	0.332778	lightonly
7	0.189278	-1min
7	0.158556	-15s
7	0.276	simultaneous
7	0.348	+15s
7	0.302833	+1min
8	0.0844444	heatonly
8	0.462056	lightonly
8	0.427556	-1min
8	0.349611	-15s
8	0.3335	simultaneous
8	0.3705	+15s
8	0.239611	+1min
9	0.112278	heatonly
9	0.143833	lightonly
9	0.1805	-1min
9	0.187222	-15s
9	0.164278	simultaneous
9	0.216333	+15s
9	0.174111	+1min
10	0.180667	heatonly
10	0.148	lightonly
10	0.214222	-1min
10	0.283611	-15s
10	0.372611	simultaneous
10	0.310778	+15s
10	0.326333	+1min
11	0.0592778	heatonly
11	0.377111	lightonly
11	0.555167	-1min
11	0.510667	-15s
11	0.6425	simultaneous
11	0.541278	+15s
11	0.497667	+1min
12	0.0815556	heatonly
12	0.011	lightonly
12	0.0475556	-1min
12	0.0178333	-15s
12	0.0905	simultaneous
12	0.0623333	+15s
12	0.0598889	+1min
13	0.0536667	heatonly
13	0.342833	lightonly
13	0.226222	-1min
13	0.213833	-15s
13	0.341667	simultaneous
13	0.195556	+15s
13	0.436944	+1min
14	0.0542778	heatonly
14	0.0659444	lightonly
14	0.0807778	-1min
14	0.296944	-15s
14	0.154111	simultaneous
14	0.344222	+15s
14	0.197889	+1min
15	0.0532222	heatonly
15	0.371722	lightonly
15	0.234778	-1min
15	0.339833	-15s
15	0.520278	simultaneous
15	0.537	+15s
15	0.440333	+1min
16	0.021	heatonly
16	0.188389	lightonly
16	0.0761111	-1min
16	0.347111	-15s
16	0.216111	simultaneous
16	0.180833	+15s
16	0.298333	+1min
17	0.317111	heatonly
17	0.266778	lightonly
17	0.207889	-1min
17	0.142222	-15s
17	0.344389	simultaneous
17	0.287889	+15s
17	0.275444	+1min
18	0.0336667	heatonly
18	0.343833	lightonly
18	0.445056	-1min
18	0.294389	-15s
18	0.411444	simultaneous
18	0.495833	+15s
18	0.515222	+1min
19	0.0536667	heatonly
19	0.256444	lightonly
19	0.247722	-1min
19	0.454444	-15s
19	0.527389	simultaneous
19	0.489778	+15s
19	0.356056	+1min
20	0.345778	heatonly
20	0.663222	lightonly
20	0.534333	-1min
20	0.736722	-15s
20	0.593167	simultaneous
20	0.633889	+15s
20	0.576389	+1min
21	0.4125	heatonly
21	0.506944	lightonly
21	0.481056	-1min
21	0.332778	-15s
21	0.572	simultaneous
21	0.567444	+15s
21	0.495389	+1min
22	0.206778	heatonly
22	0.585167	lightonly
22	0.541167	-1min
22	0.520444	-15s
22	0.661833	simultaneous
22	0.548056	+15s
22	0.649889	+1min
23	0.014	heatonly
23	0.281722	lightonly
23	0.315444	-1min
23	0.366778	-15s
23	0.1755	simultaneous
23	0.412111	+15s
23	0.408833	+1min
24	0.452111	heatonly
24	0.406833	lightonly
24	0.507444	-1min
24	0.408444	-15s
24	0.608444	simultaneous
24	0.487	+15s
24	0.504	+1min
25	0.123667	heatonly
25	0.290889	lightonly
25	0.256222	-1min
25	0.361667	-15s
25	0.375056	simultaneous
25	0.375722	+15s
25	0.252167	+1min
26	0.00777778	heatonly
26	0.0720556	lightonly
26	0.260944	-1min
26	0.127722	-15s
26	0.0930556	simultaneous
26	0.0137778	+15s
26	0.0823333	+1min
27	0.456	heatonly
27	0.3535	lightonly
27	0.228778	-1min
27	0.321444	-15s
27	0.549833	simultaneous
27	0.483167	+15s
27	0.401778	+1min
28	0.0684444	heatonly
28	0.0715	lightonly
28	0.0548889	-1min
28	0.115667	-15s
28	0.233333	simultaneous
28	0.230278	+15s
28	0.124222	+1min
29	0	heatonly
29	0.138056	lightonly
29	0.223778	-1min
29	0.241167	-15s
29	0.229389	simultaneous
29	0.0878889	+15s
29	0.00138889	+1min
30	0.0404444	heatonly
30	0.0490556	lightonly
30	0.118389	-1min
30	0.00461111	-15s
30	0.0509444	simultaneous
30	0.0568333	+15s
30	0.084	+1min
31	0.0625	heatonly
31	0.545611	lightonly
31	0.226278	-1min
31	0.551278	-15s
31	0.517667	simultaneous
31	0.402667	+15s
31	0.313722	+1min
32	0.0628333	heatonly
32	0.24	lightonly
32	0.259833	-1min
32	0.419111	-15s
32	0.476944	simultaneous
32	0.396556	+15s
32	0.302222	+1min
33	0.0548889	heatonly
33	0.158833	lightonly
33	0.155389	-1min
33	0.0686667	-15s
33	0.363056	simultaneous
33	0.351944	+15s
33	0.2115	+1min
34	0.354333	heatonly
34	0.0116667	lightonly
34	0.151333	-1min
34	0.5215	-15s
34	0.286167	simultaneous
34	0.479333	+15s
34	0.380222	+1min
35	0.0886667	heatonly
35	0.221944	lightonly
35	0.224167	-1min
35	0.277778	-15s
35	0.364556	simultaneous
35	0.422333	+15s
35	0.320722	+1min
36	0.00155556	heatonly
36	0.0512222	lightonly
36	0.0445	-1min
36	0.107056	-15s
36	0.116611	simultaneous
36	0.0613889	+15s
36	0.0757778	+1min
37	0.0121111	heatonly
37	0.0132222	lightonly
37	0.0667222	-1min
37	0.0834444	-15s
37	0.379889	simultaneous
37	0.298333	+15s
37	0.295222	+1min
38	0.0663889	heatonly
38	0.181667	lightonly
38	0.353833	-1min
38	0.395667	-15s
38	0.378667	simultaneous
38	0.349333	+15s
38	0.346611	+1min
39	0.0326111	heatonly
39	0.196833	lightonly
39	0.2725	-1min
39	0.3735	-15s
39	0.387167	simultaneous
39	0.347222	+15s
39	0.452222	+1min
40	0.0843889	heatonly
40	0.00633333	lightonly
40	0.172667	-1min
40	0.143333	-15s
40	0.224667	simultaneous
40	0.0888889	+15s
40	0.290056	+1min
41	0.201111	heatonly
41	0.0485	lightonly
41	0.171167	-1min
41	0.484833	-15s
41	0.1545	simultaneous
41	0.313	+15s
41	0.259278	+1min
42	0.0296667	heatonly
42	0.0580556	lightonly
42	0.0966111	-1min
42	0.0645	-15s
42	0.116611	simultaneous
42	0.238056	+15s
42	0.0905556	+1min
43	0.151593	heatonly
43	0.289333	lightonly
43	0.323556	-1min
43	0.428167	-15s
43	0.418222	simultaneous
43	0.388333	+15s
43	0.406556	+1min
44	0.0902222	heatonly
44	0.147389	lightonly
44	0.0337778	-1min
44	0.155056	-15s
44	0.112333	simultaneous
44	0.141944	+15s
44	0.211111	+1min
45	0.174889	heatonly
45	0.0857222	lightonly
45	0.0751667	-1min
45	0.220111	-15s
45	0.254889	simultaneous
45	0.229444	+15s
45	0.00488889	+1min
46	0.218815	heatonly
46	0.546722	lightonly
46	0.633722	-1min
46	0.667722	-15s
46	0.649333	simultaneous
46	0.726556	+15s
46	0.687778	+1min
47	0.187741	heatonly
47	0.118667	lightonly
47	0.0767778	-1min
47	0.0411667	-15s
47	0.171056	simultaneous
47	0.0628333	+15s
47	0.0484444	+1min
48	0.0981482	heatonly
48	0.120389	lightonly
48	0.108667	-1min
48	0.136389	-15s
48	0.210889	simultaneous
48	0.391389	+15s
48	0.0523333	+1min
49	0.544852	heatonly
49	0.687278	lightonly
49	0.558333	-1min
49	0.636556	-15s
49	0.510222	simultaneous
49	0.559778	+15s
49	0.586	+1min
50	0.0687037	heatonly
50	0.0168333	lightonly
50	0.00127778	-1min
50	0.0301667	-15s
50	0.163611	simultaneous
50	0.163389	+15s
50	0.0154444	+1min
51	0.165593	heatonly
51	0.377056	lightonly
51	0.533389	-1min
51	0.557944	-15s
51	0.421111	simultaneous
51	0.570111	+15s
51	0.492889	+1min
52	0.245593	heatonly
52	0.319667	lightonly
52	0.377944	-1min
52	0.4685	-15s
52	0.284778	simultaneous
52	0.3755	+15s
52	0.281333	+1min
53	0.0348518	heatonly
53	0.0638333	lightonly
53	0.0727778	-1min
53	0.270833	-15s
53	0.517611	simultaneous
53	0.583833	+15s
53	0.455111	+1min
54	0.0943704	heatonly
54	0.0916667	lightonly
54	0.124944	-1min
54	0.198	-15s
54	0.183556	simultaneous
54	0.209444	+15s
54	0.257889	+1min
55	0.080037	heatonly
55	0.243722	lightonly
55	0.165611	-1min
55	0.262222	-15s
55	0.105333	simultaneous
55	0.454722	+15s
55	0.390333	+1min
56	0.0541667	heatonly
56	0.0831111	lightonly
56	0.255222	-1min
56	0.227	-15s
56	0.388	simultaneous
56	0.309778	+15s
56	0.0681667	+1min
57	0.108611	heatonly
57	0.148944	lightonly
57	0.103333	-1min
57	0.211056	-15s
57	0.383	simultaneous
57	0.366889	+15s
57	0.308333	+1min
58	0.0345556	heatonly
58	0.118222	lightonly
58	0.131111	-1min
58	0.129	-15s
58	0.318444	simultaneous
58	0.276611	+15s
58	0.163611	+1min
59	0.187333	heatonly
59	0.0881667	lightonly
59	0.105278	-1min
59	0.1655	-15s
59	0.0419444	simultaneous
59	0.0587778	+15s
59	0.247556	+1min
60	0.151389	heatonly
60	0.116667	lightonly
60	0.212444	-1min
60	0.265222	-15s
60	0.258889	simultaneous
60	0.139333	+15s
60	0.288944	+1min
61	0.0957222	heatonly
61	0.326833	lightonly
61	0.187111	-1min
61	0.23	-15s
61	0.104611	simultaneous
61	0.292056	+15s
61	0.280444	+1min
62	0.0995556	heatonly
62	0.0699444	lightonly
62	0.0386111	-1min
62	0.110222	-15s
62	0.125778	simultaneous
62	0.218222	+15s
62	0.2155	+1min
63	0.140833	heatonly
63	0.377	lightonly
63	0.238389	-1min
63	0.669556	-15s
63	0.448944	simultaneous
63	0.699556	+15s
63	0.647556	+1min
64	0.0687222	heatonly
64	0.125611	lightonly
64	0.226389	-1min
64	0.3045	-15s
64	0.154278	simultaneous
64	0.239111	+15s
64	0.225278	+1min
65	0.0531111	heatonly
65	0.140389	lightonly
65	0.140222	-1min
65	0	-15s
65	0.296667	simultaneous
65	0.212278	+15s
65	0.182667	+1min
66	0.259278	heatonly
66	0.218944	lightonly
66	0.5015	-1min
66	0.412333	-15s
66	0.264611	simultaneous
66	0.445611	+15s
66	0.464	+1min
67	0.0316111	heatonly
67	0.278278	lightonly
67	0.231278	-1min
67	0.248111	-15s
67	0.1115	simultaneous
67	0.2355	+15s
67	0.297444	+1min
68	0.0552778	heatonly
68	0.0437778	lightonly
68	0.164278	-1min
68	0.165167	-15s
68	0.1215	simultaneous
68	0.147556	+15s
68	0.104	+1min
69	0.019	heatonly
69	0.134111	lightonly
69	0.102111	-1min
69	0.118778	-15s
69	0.110444	simultaneous
69	0.0906667	+15s
69	0.227111	+1min
70	0.396667	heatonly
70	0.222889	lightonly
70	0.366056	-1min
70	0.443556	-15s
70	0.485333	simultaneous
70	0.268056	+15s
70	0.254778	+1min
71	0.083	heatonly
71	0.163333	lightonly
71	0.139833	-1min
71	0.223833	-15s
71	0.399222	simultaneous
71	0.513167	+15s
71	0.349667	+1min
72	0.0572778	heatonly
72	0.171444	lightonly
72	0.0671111	-1min
72	0.226778	-15s
72	0.360444	simultaneous
72	0.364556	+15s
72	0.222778	+1min
73	0.230278	heatonly
73	0.214111	lightonly
73	0.254278	-1min
73	0.131722	-15s
73	0.464944	simultaneous
73	0.246	+15s
73	0.372056	+1min
74	0.259944	heatonly
74	0.439	lightonly
74	0.541611	-1min
74	0.480056	-15s
74	0.655778	simultaneous
74	0.525222	+15s
74	0.737722	+1min
75	0.178333	heatonly
75	0.265944	lightonly
75	0.150167	-1min
75	0.251	-15s
75	0.280611	simultaneous
75	0.284889	+15s
75	0.293611	+1min
76	0.153444	heatonly
76	0.372167	lightonly
76	0.414833	-1min
76	0.352444	-15s
76	0.434	simultaneous
76	0.387111	+15s
76	0.357667	+1min
77	0.114222	heatonly
77	0.444556	lightonly
77	0.565556	-1min
77	0.543611	-15s
77	0.182	simultaneous
77	0.515667	+15s
77	0.607667	+1min
78	0.0935556	heatonly
78	0.0221111	lightonly
78	0.0652778	-1min
78	0.0331667	-15s
78	0.0502778	simultaneous
78	0.274722	+15s
78	0.210333	+1min
79	0.347444	heatonly
79	0.568111	lightonly
79	0.619	-1min
79	0.650056	-15s
79	0.770333	simultaneous
79	0.700111	+15s
79	0.620389	+1min
80	0.141	heatonly
80	0.235111	lightonly
80	0.329278	-1min
80	0.323056	-15s
80	0.388444	simultaneous
80	0.257889	+15s
80	0.314	+1min
81	0.102611	heatonly
81	0.0417222	lightonly
81	0.0422778	-1min
81	0.0478889	-15s
81	0.197611	simultaneous
81	0.0113333	+15s
81	0.179333	+1min
82	0.0757778	heatonly
82	0.194556	lightonly
82	0.202278	-1min
82	0.367444	-15s
82	0.207222	simultaneous
82	0.395444	+15s
82	0.360556	+1min
83	0.316833	heatonly
83	0.276444	lightonly
83	0.285667	-1min
83	0.437111	-15s
83	0.505611	simultaneous
83	0.293667	+15s
83	0.180222	+1min
84	0.0199444	heatonly
84	0.388944	lightonly
84	0.260111	-1min
84	0.257222	-15s
84	0.319556	simultaneous
84	0.356222	+15s
84	0.253778	+1min
85	0.00794444	heatonly
85	0.157167	lightonly
85	0.25	-1min
85	0.0918333	-15s
85	0.167111	simultaneous
85	0.364167	+15s
85	0.354278	+1min
86	0.202667	heatonly
86	0.265611	lightonly
86	0.462111	-1min
86	0.2495	-15s
86	0.338611	simultaneous
86	0.427722	+15s
86	0.483556	+1min
87	0.241222	heatonly
87	0.395667	lightonly
87	0.3055	-1min
87	0.245833	-15s
87	0.283167	simultaneous
87	0.319944	+15s
87	0.567722	+1min
88	0.143222	heatonly
88	0.378444	lightonly
88	0.459944	-1min
88	0.458667	-15s
88	0.492	simultaneous
88	0.382056	+15s
88	0.5605	+1min
89	0.0585	heatonly
89	0.449278	lightonly
89	0.408167	-1min
89	0.364444	-15s
89	0.288833	simultaneous
89	0.470611	+15s
89	0.3305	+1min
90	0.179833	heatonly
90	0.347722	lightonly
90	0.352833	-1min
90	0.305778	-15s
90	0.267111	simultaneous
90	0.406833	+15s
90	0.228611	+1min
91	0.00138889	heatonly
91	0.370056	lightonly
91	0.311556	-1min
91	0.3195	-15s
91	0.394444	simultaneous
91	0.337611	+15s
91	0.299722	+1min
92	0.272333	heatonly
92	0.44	lightonly
92	0.555944	-1min
92	0.491611	-15s
92	0.572111	simultaneous
92	0.509556	+15s
92	0.358389	+1min
93	0.0682222	heatonly
93	0.428167	lightonly
93	0.362111	-1min
93	0.323722	-15s
93	0.332	simultaneous
93	0.338722	+15s
93	0.5225	+1min
94	0.385944	heatonly
94	0.450167	lightonly
94	0.429944	-1min
94	0.518556	-15s
94	0.243278	simultaneous
94	0.392056	+15s
94	0.201889	+1min
95	0.194111	heatonly
95	0.333278	lightonly
95	0.313167	-1min
95	0.371833	-15s
95	0.604278	simultaneous
95	0.551222	+15s
95	0.414222	+1min
96	0.0924444	heatonly
96	0.158444	lightonly
96	0.163722	-1min
96	0.196111	-15s
96	0.0698333	simultaneous
96	0.195944	+15s
96	0.281611	+1min
97	0.178278	heatonly
97	0.467722	lightonly
97	0.465056	-1min
97	0.236778	-15s
97	0.246667	simultaneous
97	0.476	+15s
97	0.281	+1min
98	0.283111	heatonly
98	0.602833	lightonly
98	0.414167	-1min
98	0.493056	-15s
98	0.663444	simultaneous
98	0.500389	+15s
98	0.446944	+1min
99	0.0214444	heatonly
99	0.123611	lightonly
99	0.0963889	-1min
99	0.293111	-15s
99	0.181	simultaneous
99	0.210389	+15s
99	0.181556	+1min
100	0.00366667	heatonly
100	0.0845	lightonly
100	0.0971111	-1min
100	0.0852778	-15s
100	0.149611	simultaneous
100	0.103222	+15s
100	0.117833	+1min
101	0.0698333	heatonly
101	0.0991667	lightonly
101	0.0373889	-1min
101	0.142556	-15s
101	0.378556	simultaneous
101	0.184	+15s
101	0.178722	+1min
102	0.155111	heatonly
102	0.293889	lightonly
102	0.182833	-1min
102	0.0852222	-15s
102	0.496556	simultaneous
102	0.390389	+15s
102	0.372556	+1min
103	0.219611	heatonly
103	0.137278	lightonly
103	0.118222	-1min
103	0.0441667	-15s
103	0.170222	simultaneous
103	0.0830556	+15s
103	0.224667	+1min
104	0.142333	heatonly
104	0.244	lightonly
104	0.300778	-1min
104	0.174889	-15s
104	0.165889	simultaneous
104	0.320556	+15s
104	0.342667	+1min
105	0.165167	heatonly
105	0.162944	lightonly
105	0.247611	-1min
105	0.218611	-15s
105	0.337778	simultaneous
105	0.212	+15s
105	0.329	+1min
106	0.00138889	heatonly
106	0.114611	lightonly
106	0.119222	-1min
106	0.119	-15s
106	0.133667	simultaneous
106	0.140944	+15s
106	0.0694444	+1min
107	0.269611	heatonly
107	0.2155	lightonly
107	0.240722	-1min
107	0.186556	-15s
107	0.408056	simultaneous
107	0.568611	+15s
107	0.4635	+1min
108	0.0156111	heatonly
108	0.129278	lightonly
108	0.290111	-1min
108	0.1265	-15s
108	0.258333	simultaneous
108	0.162	+15s
108	0.242833	+1min
109	0.0837222	heatonly
109	0.0786111	lightonly
109	0.206556	-1min
109	0.117167	-15s
109	0.206111	simultaneous
109	0.162556	+15s
109	0.350556	+1min
110	0.062	heatonly
110	0.108667	lightonly
110	0.044	-1min
110	0.0704444	-15s
110	0.270556	simultaneous
110	0.124611	+15s
110	0	+1min
111	0.00233333	heatonly
111	0.123556	lightonly
111	0.0379444	-1min
111	0	-15s
111	0.158944	simultaneous
111	0.106111	+15s
111	0.0952222	+1min

## Sheet: Figure 4C
Figure 4C
mosquito	behavior_prop	stimulus
0	0.0296111	heatonly
0	0.106389	lightonly
0	0.0267222	-1min
0	0.0884444	-15s
0	0.0837778	simultaneous
0	0.101222	+15s
0	0.0776667	+1min
1	0.00477778	heatonly
1	0.0344444	lightonly
1	0.0252222	-1min
1	0.0163333	-15s
1	0.0236111	simultaneous
1	0.0583889	+15s
1	0.0164444	+1min
2	0.0991111	heatonly
2	0.0175556	lightonly
2	0.00172222	-1min
2	0.0272778	-15s
2	0.0236111	simultaneous
2	0.0264444	+15s
2	0.0407222	+1min
3	0.0145	heatonly
3	0.0279444	lightonly
3	0.029	-1min
3	0.0266111	-15s
3	0.0188889	simultaneous
3	0.036	+15s
3	0.00905556	+1min
4	0.00088889	heatonly
4	0.0266667	lightonly
4	0.0253333	-1min
4	0.00338889	-15s
4	0.00372222	simultaneous
4	0.0147778	+15s
4	0.0345	+1min
5	0.0287222	heatonly
5	0.0511111	lightonly
5	0.0617778	-1min
5	0.0255	-15s
5	0.0313333	simultaneous
5	0.0390556	+15s
5	0.0105556	+1min
6	0.0258889	heatonly
6	0.0627222	lightonly
6	0.0433333	-1min
6	0.0633889	-15s
6	0.0416111	simultaneous
6	0.0920556	+15s
6	0.0555	+1min
7	0.00733333	heatonly
7	0.0487222	lightonly
7	0.0198889	-1min
7	0.0176111	-15s
7	0.0251111	simultaneous
7	0.0252222	+15s
7	0.0376667	+1min
8	0.00888889	heatonly
8	0.0697778	lightonly
8	0.0416111	-1min
8	0.0334444	-15s
8	0.0378889	simultaneous
8	0.0247222	+15s
8	0.028	+1min
9	0.0143889	heatonly
9	0.0250556	lightonly
9	0.0163889	-1min
9	0.00216667	-15s
9	0.00261111	simultaneous
9	0.0158333	+15s
9	0.0132778	+1min
10	0.0347778	heatonly
10	0.0135556	lightonly
10	0.0112778	-1min
10	0.0118333	-15s
10	0.0122222	simultaneous
10	0.0137222	+15s
10	0.0238889	+1min
11	0.0182222	heatonly
11	0.0853889	lightonly
11	0.174722	-1min
11	0.188833	-15s
11	0.282278	simultaneous
11	0.197389	+15s
11	0.118722	+1min
12	0.0134444	heatonly
12	0.004	lightonly
12	0.00527778	-1min
12	0.001	-15s
12	0.0217778	simultaneous
12	0.00655556	+15s
12	0.00338889	+1min
13	0	heatonly
13	0.0637222	lightonly
13	0.0313889	-1min
13	0.0207778	-15s
13	0.0663333	simultaneous
13	0.0342222	+15s
13	0.0455	+1min
14	0.0122778	heatonly
14	0.0160556	lightonly
14	0.024	-1min
14	0.031	-15s
14	0.0333889	simultaneous
14	0.0528333	+15s
14	0.0237222	+1min
15	0.0175	heatonly
15	0.0361667	lightonly
15	0.0336667	-1min
15	0.0341111	-15s
15	0.0572778	simultaneous
15	0.0819444	+15s
15	0.0556667	+1min
16	0.0045	heatonly
16	0.0256667	lightonly
16	0.0213333	-1min
16	0.0356111	-15s
16	0.0207778	simultaneous
16	0.0208333	+15s
16	0.0361667	+1min
17	0.0415556	heatonly
17	0.0324444	lightonly
17	0.0605556	-1min
17	0.00344444	-15s
17	0.0396667	simultaneous
17	0.0381111	+15s
17	0.0690556	+1min
18	0.00355556	heatonly
18	0.0266111	lightonly
18	0.0478889	-1min
18	0.0117222	-15s
18	0.0994444	simultaneous
18	0.0951111	+15s
18	0.137278	+1min
19	0.00038889	heatonly
19	0.00522222	lightonly
19	0.00611111	-1min
19	0.0122778	-15s
19	0.0152222	simultaneous
19	0.0563889	+15s
19	0.0705556	+1min
20	0.0266111	heatonly
20	0.0296111	lightonly
20	0.0289444	-1min
20	0.0370556	-15s
20	0.0428889	simultaneous
20	0.0585556	+15s
20	0.056	+1min
21	0.0443889	heatonly
21	0.0587778	lightonly
21	0.0359444	-1min
21	0.0407222	-15s
21	0.0837778	simultaneous
21	0.124278	+15s
21	0.0872778	+1min
22	0.0211667	heatonly
22	0.0336111	lightonly
22	0.0254444	-1min
22	0.0344444	-15s
22	0.0826667	simultaneous
22	0.0696667	+15s
22	0.0627778	+1min
23	0.005	heatonly
23	0.0102778	lightonly
23	0.0428889	-1min
23	0.0243889	-15s
23	0.0321111	simultaneous
23	0.0723333	+15s
23	0.0543889	+1min
24	0.0611667	heatonly
24	0.0292778	lightonly
24	0.103444	-1min
24	0.0471667	-15s
24	0.0875556	simultaneous
24	0.0910556	+15s
24	0.105722	+1min
25	0.00627778	heatonly
25	0.0172778	lightonly
25	0.078	-1min
25	0.0343889	-15s
25	0.0627222	simultaneous
25	0.0618333	+15s
25	0.024	+1min
26	0.00177778	heatonly
26	0.00566667	lightonly
26	0.0306111	-1min
26	0.0316111	-15s
26	0.0311111	simultaneous
26	0.003	+15s
26	0.0162778	+1min
27	0.0281667	heatonly
27	0.0247222	lightonly
27	0.0106111	-1min
27	0.0102222	-15s
27	0.0657222	simultaneous
27	0.0815556	+15s
27	0.0403889	+1min
28	0.0633889	heatonly
28	0.00538889	lightonly
28	0.0335	-1min
28	0.0178889	-15s
28	0.092	simultaneous
28	0.0717778	+15s
28	0.0212222	+1min
29	0.0342222	heatonly
29	0.0143889	lightonly
29	0.0528889	-1min
29	0.0227222	-15s
29	0.0498889	simultaneous
29	0.00822222	+15s
29	0	+1min
30	0.0137222	heatonly
30	0.0154444	lightonly
30	0.0347222	-1min
30	0	-15s
30	0.0496667	simultaneous
30	0.031	+15s
30	0.0373889	+1min
31	0.0606111	heatonly
31	0.0166667	lightonly
31	0.00705556	-1min
31	0.0483889	-15s
31	0.0376667	simultaneous
31	0.0141111	+15s
31	0.0137778	+1min
32	0.0267778	heatonly
32	0.0599444	lightonly
32	0.0353889	-1min
32	0.0827222	-15s
32	0.136389	simultaneous
32	0.105556	+15s
32	0.0860556	+1min
33	0.0275556	heatonly
33	0.00622222	lightonly
33	0.0508333	-1min
33	0.0131111	-15s
33	0.0655	simultaneous
33	0.0428889	+15s
33	0.0203889	+1min
34	0.0574444	heatonly
34	0	lightonly
34	0.00294444	-1min
34	0.0815556	-15s
34	0.0425	simultaneous
34	0.0126667	+15s
34	0.0557778	+1min
35	0.00288889	heatonly
35	0.00622222	lightonly
35	0.0333333	-1min
35	0.0305556	-15s
35	0.0597778	simultaneous
35	0.1205	+15s
35	0.0982778	+1min
36	0	heatonly
36	0.00655556	lightonly
36	0.00888889	-1min
36	0.0172778	-15s
36	0.00405556	simultaneous
36	0.00822222	+15s
36	0.00405556	+1min
37	0.006	heatonly
37	0.00033333	lightonly
37	0.00044444	-1min
37	0.00583333	-15s
37	0.0255556	simultaneous
37	0.0344444	+15s
37	0.0274444	+1min
38	0.0280556	heatonly
38	0.0291667	lightonly
38	0.0528333	-1min
38	0.0765556	-15s
38	0.0881111	simultaneous
38	0.0431111	+15s
38	0.0423333	+1min
39	0	heatonly
39	0.00377778	lightonly
39	0.0219444	-1min
39	0.0311111	-15s
39	0.0510556	simultaneous
39	0.0206667	+15s
39	0.0322222	+1min
40	0.00511111	heatonly
40	0.00238889	lightonly
40	0.00533333	-1min
40	0.0085	-15s
40	0.0122778	simultaneous
40	0.0120556	+15s
40	0.0206667	+1min
41	0.0575	heatonly
41	0.00966667	lightonly
41	0.121056	-1min
41	0.202611	-15s
41	0.0478889	simultaneous
41	0.130389	+15s
41	0.0903333	+1min
42	0.0207778	heatonly
42	0.04	lightonly
42	0.123889	-1min
42	0.0542222	-15s
42	0.223611	simultaneous
42	0.170444	+15s
42	0.0137778	+1min
43	0.185407	heatonly
43	0.2315	lightonly
43	0.168944	-1min
43	0.163389	-15s
43	0.189056	simultaneous
43	0.171833	+15s
43	0.168556	+1min
44	0.0368889	heatonly
44	0.033	lightonly
44	0.0182222	-1min
44	0.0413333	-15s
44	0.0269444	simultaneous
44	0.0424444	+15s
44	0.044	+1min
45	0.0228148	heatonly
45	0.0302222	lightonly
45	0.00944444	-1min
45	0.0307778	-15s
45	0.112056	simultaneous
45	0.0558889	+15s
45	0	+1min
46	0.0788889	heatonly
46	0.116333	lightonly
46	0.229278	-1min
46	0.184944	-15s
46	0.170222	simultaneous
46	0.162722	+15s
46	0.205	+1min
47	0.0671852	heatonly
47	0.0550556	lightonly
47	0.0426111	-1min
47	0.0266111	-15s
47	0.0415	simultaneous
47	0.0253889	+15s
47	0.0157778	+1min
48	0.0318148	heatonly
48	0.102944	lightonly
48	0.0133333	-1min
48	0.029	-15s
48	0.0845556	simultaneous
48	0.130556	+15s
48	0.035	+1min
49	0.383778	heatonly
49	0.302833	lightonly
49	0.328833	-1min
49	0.360167	-15s
49	0.279111	simultaneous
49	0.313611	+15s
49	0.392	+1min
50	0.00114815	heatonly
50	0	lightonly
50	0	-1min
50	0.0045	-15s
50	0.00744444	simultaneous
50	0.0205556	+15s
50	0	+1min
51	0.0834815	heatonly
51	0.1805	lightonly
51	0.259056	-1min
51	0.294278	-15s
51	0.111889	simultaneous
51	0.209667	+15s
51	0.278667	+1min
52	0.262926	heatonly
52	0.246611	lightonly
52	0.285944	-1min
52	0.264278	-15s
52	0.212167	simultaneous
52	0.206444	+15s
52	0.209111	+1min
53	0.0508518	heatonly
53	0.0143889	lightonly
53	0.0594444	-1min
53	0.0880556	-15s
53	0.162444	simultaneous
53	0.176444	+15s
53	0.172778	+1min
54	0.00748148	heatonly
54	0.0165	lightonly
54	0.00411111	-1min
54	0.0365	-15s
54	0.0255556	simultaneous
54	0.0120556	+15s
54	0.0327778	+1min
55	0.0311852	heatonly
55	0.0442222	lightonly
55	0.0404444	-1min
55	0.0816111	-15s
55	0.0378889	simultaneous
55	0.144833	+15s
55	0.0843333	+1min
56	0.0537222	heatonly
56	0.00694444	lightonly
56	0.03	-1min
56	0.0813889	-15s
56	0.0979444	simultaneous
56	0.100722	+15s
56	0.114333	+1min
57	0.0797778	heatonly
57	0.0101111	lightonly
57	0.0432222	-1min
57	0.056	-15s
57	0.0804444	simultaneous
57	0.0952222	+15s
57	0.0921111	+1min
58	0.0239444	heatonly
58	0.0355	lightonly
58	0.0533333	-1min
58	0.0572222	-15s
58	0.052	simultaneous
58	0.0727222	+15s
58	0.0606111	+1min
59	0.0452222	heatonly
59	0.0356111	lightonly
59	0.0240556	-1min
59	0.0477222	-15s
59	0.0211667	simultaneous
59	0.0462778	+15s
59	0.0555	+1min
60	0.0246667	heatonly
60	0.005	lightonly
60	0.0508889	-1min
60	0.0615556	-15s
60	0.0441111	simultaneous
60	0.0286667	+15s
60	0.0638889	+1min
61	0.0217222	heatonly
61	0.0538889	lightonly
61	0.0128333	-1min
61	0.0622222	-15s
61	0.0258889	simultaneous
61	0.121444	+15s
61	0.0537778	+1min
62	0.0249444	heatonly
62	0.0101667	lightonly
62	0.0153889	-1min
62	0.0497222	-15s
62	0.0330556	simultaneous
62	0.0564444	+15s
62	0.0546111	+1min
63	0.100056	heatonly
63	0.0637222	lightonly
63	0.0682778	-1min
63	0.139111	-15s
63	0.110833	simultaneous
63	0.180944	+15s
63	0.136833	+1min
64	0.0102778	heatonly
64	0.00372222	lightonly
64	0.0383333	-1min
64	0.0532778	-15s
64	0.00705556	simultaneous
64	0.0415	+15s
64	0.0338889	+1min
65	0.0631667	heatonly
65	0.00611111	lightonly
65	0.00127778	-1min
65	0	-15s
65	0.0198889	simultaneous
65	0.0114444	+15s
65	0.0105	+1min
66	0.125056	heatonly
66	0.0350556	lightonly
66	0.162167	-1min
66	0.190278	-15s
66	0.0877222	simultaneous
66	0.179889	+15s
66	0.183	+1min
67	0.115056	heatonly
67	0.0923333	lightonly
67	0.0833333	-1min
67	0.0497222	-15s
67	0.0206111	simultaneous
67	0.0856111	+15s
67	0.0818889	+1min
68	0.0402778	heatonly
68	0.0247222	lightonly
68	0.0332778	-1min
68	0.0718333	-15s
68	0.0753333	simultaneous
68	0.0875	+15s
68	0.0271667	+1min
69	0.00088889	heatonly
69	0.00688889	lightonly
69	0.0354444	-1min
69	0.0563889	-15s
69	0.0572778	simultaneous
69	0.0267222	+15s
69	0.0865	+1min
70	0.231389	heatonly
70	0.0712222	lightonly
70	0.214944	-1min
70	0.132722	-15s
70	0.194722	simultaneous
70	0.121611	+15s
70	0.116111	+1min
71	0.0085	heatonly
71	0.0673333	lightonly
71	0.0449444	-1min
71	0.0882778	-15s
71	0.0704444	simultaneous
71	0.138778	+15s
71	0.0895556	+1min
72	0.0473889	heatonly
72	0.0367778	lightonly
72	0.0115	-1min
72	0.0654444	-15s
72	0.0409444	simultaneous
72	0.109722	+15s
72	0.0598333	+1min
73	0.122778	heatonly
73	0.203278	lightonly
73	0.207778	-1min
73	0.063	-15s
73	0.341333	simultaneous
73	0.251722	+15s
73	0.204611	+1min
74	0.0673889	heatonly
74	0.153167	lightonly
74	0.169778	-1min
74	0.105611	-15s
74	0.122944	simultaneous
74	0.288	+15s
74	0.280444	+1min
75	0.0323333	heatonly
75	0.0944444	lightonly
75	0.0313889	-1min
75	0.0471667	-15s
75	0.0329444	simultaneous
75	0.0758333	+15s
75	0.0321667	+1min
76	0.0398333	heatonly
76	0.159833	lightonly
76	0.061	-1min
76	0.0473333	-15s
76	0.0702222	simultaneous
76	0.0671111	+15s
76	0.0609444	+1min
77	0.0583889	heatonly
77	0.347111	lightonly
77	0.361222	-1min
77	0.369611	-15s
77	0.0754444	simultaneous
77	0.402722	+15s
77	0.459167	+1min
78	0.0350556	heatonly
78	0.0158333	lightonly
78	0.0402778	-1min
78	0.0136667	-15s
78	0.00355556	simultaneous
78	0.110389	+15s
78	0.109111	+1min
79	0.186278	heatonly
79	0.250056	lightonly
79	0.242611	-1min
79	0.205389	-15s
79	0.330444	simultaneous
79	0.378333	+15s
79	0.277278	+1min
80	0.106333	heatonly
80	0.134	lightonly
80	0.0885	-1min
80	0.147444	-15s
80	0.232722	simultaneous
80	0.161667	+15s
80	0.216556	+1min
81	0.0193889	heatonly
81	0.0206667	lightonly
81	0.0105556	-1min
81	0.005	-15s
81	0.0686111	simultaneous
81	0.00455556	+15s
81	0.0628333	+1min
82	0.0316111	heatonly
82	0.0742222	lightonly
82	0.0378889	-1min
82	0.0591111	-15s
82	0.0907778	simultaneous
82	0.104444	+15s
82	0.0804444	+1min
83	0.215056	heatonly
83	0.307444	lightonly
83	0.212944	-1min
83	0.329444	-15s
83	0.296778	simultaneous
83	0.213667	+15s
83	0.101889	+1min
84	0.00188889	heatonly
84	0.2355	lightonly
84	0.144056	-1min
84	0.157056	-15s
84	0.161333	simultaneous
84	0.141389	+15s
84	0.125833	+1min
85	0	heatonly
85	0.0181667	lightonly
85	0.153611	-1min
85	0.0550556	-15s
85	0.0485	simultaneous
85	0.0480556	+15s
85	0.176167	+1min
86	0.107889	heatonly
86	0.240389	lightonly
86	0.277222	-1min
86	0.177667	-15s
86	0.188944	simultaneous
86	0.227	+15s
86	0.314222	+1min
87	0.137667	heatonly
87	0.152944	lightonly
87	0.144611	-1min
87	0.0821111	-15s
87	0.0562222	simultaneous
87	0.0568333	+15s
87	0.297667	+1min
88	0.0805	heatonly
88	0.138	lightonly
88	0.121333	-1min
88	0.176889	-15s
88	0.113944	simultaneous
88	0.103778	+15s
88	0.190278	+1min
89	0.0753333	heatonly
89	0.534	lightonly
89	0.426889	-1min
89	0.330611	-15s
89	0.304889	simultaneous
89	0.370556	+15s
89	0.370111	+1min
90	0.0739444	heatonly
90	0.117833	lightonly
90	0.144778	-1min
90	0.0992222	-15s
90	0.0437222	simultaneous
90	0.0915556	+15s
90	0.0720556	+1min
91	0.00144444	heatonly
91	0.0767778	lightonly
91	0.1235	-1min
91	0.0652778	-15s
91	0.0617222	simultaneous
91	0.0575	+15s
91	0.108444	+1min
92	0.285778	heatonly
92	0.522222	lightonly
92	0.548389	-1min
92	0.404833	-15s
92	0.518944	simultaneous
92	0.393389	+15s
92	0.378	+1min
93	0.0567778	heatonly
93	0.313556	lightonly
93	0.2095	-1min
93	0.224667	-15s
93	0.0914444	simultaneous
93	0.139333	+15s
93	0.293444	+1min
94	0.252389	heatonly
94	0.286667	lightonly
94	0.321778	-1min
94	0.266111	-15s
94	0.0272222	simultaneous
94	0.180833	+15s
94	0.0395556	+1min
95	0.1835	heatonly
95	0.259889	lightonly
95	0.268333	-1min
95	0.2115	-15s
95	0.2685	simultaneous
95	0.3845	+15s
95	0.238111	+1min
96	0.0531667	heatonly
96	0.0578889	lightonly
96	0.0629444	-1min
96	0.0905556	-15s
96	0.0105	simultaneous
96	0.0672222	+15s
96	0.116833	+1min
97	0.0725556	heatonly
97	0.134944	lightonly
97	0.132944	-1min
97	0.0817778	-15s
97	0.0318889	simultaneous
97	0.0495	+15s
97	0.113333	+1min
98	0.0383333	heatonly
98	0.0658333	lightonly
98	0.0342222	-1min
98	0.0996667	-15s
98	0.141722	simultaneous
98	0.0536111	+15s
98	0.0607222	+1min
99	0.0437778	heatonly
99	0.0719444	lightonly
99	0.0648889	-1min
99	0.112111	-15s
99	0.0716111	simultaneous
99	0.0907778	+15s
99	0.0588889	+1min
100	0.00861111	heatonly
100	0.0163889	lightonly
100	0.0145	-1min
100	0.00333333	-15s
100	0.0248889	simultaneous
100	0.044	+15s
100	0.00683333	+1min
101	0.0212778	heatonly
101	0.0232778	lightonly
101	0.00938889	-1min
101	0.104889	-15s
101	0.136333	simultaneous
101	0.112611	+15s
101	0.0393889	+1min
102	0.0428333	heatonly
102	0.118778	lightonly
102	0.0208889	-1min
102	0.0126111	-15s
102	0.122167	simultaneous
102	0.114889	+15s
102	0.177444	+1min
103	0.165611	heatonly
103	0.116444	lightonly
103	0.138722	-1min
103	0.105111	-15s
103	0.148056	simultaneous
103	0.0906667	+15s
103	0.1455	+1min
104	0.119333	heatonly
104	0.104833	lightonly
104	0.153778	-1min
104	0.0937778	-15s
104	0.112333	simultaneous
104	0.159167	+15s
104	0.134333	+1min
105	0.0502222	heatonly
105	0.024	lightonly
105	0.0389444	-1min
105	0.0600556	-15s
105	0.0481111	simultaneous
105	0.0871111	+15s
105	0.0737222	+1min
106	0	heatonly
106	0.0192778	lightonly
106	0.0114444	-1min
106	0.039	-15s
106	0.0358889	simultaneous
106	0.0593889	+15s
106	0.0392222	+1min
107	0.132278	heatonly
107	0.0195556	lightonly
107	0.0675556	-1min
107	0.00561111	-15s
107	0.0973889	simultaneous
107	0.123667	+15s
107	0.130722	+1min
108	0.00905556	heatonly
108	0.00888889	lightonly
108	0.0511111	-1min
108	0.0210556	-15s
108	0.0987222	simultaneous
108	0.0877222	+15s
108	0.0507222	+1min
109	0.0343333	heatonly
109	0.0170556	lightonly
109	0.0537778	-1min
109	0.0686667	-15s
109	0.0794444	simultaneous
109	0.0644444	+15s
109	0.0859444	+1min
110	0.00383333	heatonly
110	0.0118889	lightonly
110	0.00922222	-1min
110	0.0233889	-15s
110	0.117333	simultaneous
110	0.105167	+15s
110	0.00033333	+1min
111	0	heatonly
111	0.0323333	lightonly
111	0.0203333	-1min
111	0.00133333	-15s
111	0.078	simultaneous
111	0.0397222	+15s
111	0.0334444	+1min

## Sheet: Figure 4E
Figure 4E
mosquito	behavior_prop	stimulus
0	0.233056	heatonly
0	0.072	lightonly
0	0.115722	8min
0	0.163333	4min
0	0.271889	2min
0	0.165167	simultaneous
1	0.0692222	heatonly
1	0.0591667	lightonly
1	0.00072222	8min
1	0.0161111	4min
1	0.168722	2min
1	0.122889	simultaneous
2	0.0232778	heatonly
2	0.0206667	lightonly
2	0.0913333	8min
2	0.442722	4min
2	0.252111	2min
2	0.275889	simultaneous
3	0.0388333	heatonly
3	0.322778	lightonly
3	0.333167	8min
3	0.150111	4min
3	0.355278	2min
3	0.514667	simultaneous
4	0.138778	heatonly
4	0.276833	lightonly
4	0.369167	8min
4	0.245611	4min
4	0.191	2min
4	0.192278	simultaneous
5	0.0905	heatonly
5	0.0603889	lightonly
5	0.161222	8min
5	0.193889	4min
5	0.181556	2min
5	0.298389	simultaneous
6	0.0655	heatonly
6	0.197611	lightonly
6	0.305167	8min
6	0.250667	4min
6	0.273111	2min
6	0.192667	simultaneous
7	0.214056	heatonly
7	0.448611	lightonly
7	0.162944	8min
7	0.343167	4min
7	0.387611	2min
7	0.660389	simultaneous
8	0.0855	heatonly
8	0.322389	lightonly
8	0.00077778	8min
8	0.372944	4min
8	0.245611	2min
8	0.699444	simultaneous
9	0.105778	heatonly
9	0.0384444	lightonly
9	0.101333	8min
9	0.0137222	4min
9	0.102722	2min
9	0.192056	simultaneous
10	0.146833	heatonly
10	0.249222	lightonly
10	0.197333	8min
10	0.0425556	4min
10	0.401278	2min
10	0.340667	simultaneous
11	0.131444	heatonly
11	0.220056	lightonly
11	0.1605	8min
11	0.247556	4min
11	0.280556	2min
11	0.543722	simultaneous
12	0.00527778	heatonly
12	0.220444	lightonly
12	0.0128889	8min
12	0.0989444	4min
12	0.270222	2min
12	0.062	simultaneous
13	0	heatonly
13	0.103944	lightonly
13	0.0153333	8min
13	0.109389	4min
13	0	2min
13	0.0180556	simultaneous
14	0.360278	heatonly
14	0.2085	lightonly
14	0.0618889	8min
14	0.307	4min
14	0.623944	2min
14	0.387111	simultaneous
15	0.174722	heatonly
15	0.529667	lightonly
15	0.145722	8min
15	0.281	4min
15	0.3185	2min
15	0.677111	simultaneous
16	0.118278	heatonly
16	0.0798889	lightonly
16	0.138611	8min
16	0.137	4min
16	0.221944	2min
16	0.226611	simultaneous
17	0.208944	heatonly
17	0.234889	lightonly
17	0.153556	8min
17	0.364444	4min
17	0.524778	2min
17	0.419278	simultaneous
18	0.0102778	heatonly
18	0.342722	lightonly
18	0.169333	8min
18	0.445333	4min
18	0.331556	2min
18	0.695167	simultaneous
19	0.168222	heatonly
19	0.381333	lightonly
19	0.2655	8min
19	0.488889	4min
19	0.466333	2min
19	0.407722	simultaneous
20	0.0483889	heatonly
20	0.124167	lightonly
20	0.0618333	8min
20	0.002	4min
20	0.0547222	2min
20	0.342833	simultaneous
21	0.0552222	heatonly
21	0.424778	lightonly
21	0.168222	8min
21	0.213444	4min
21	0.507611	2min
21	0.453611	simultaneous
22	0.00338889	heatonly
22	0.320333	lightonly
22	0.0595556	8min
22	0.006	4min
22	0.186278	2min
22	0.286167	simultaneous
23	0.110278	heatonly
23	0.406222	lightonly
23	0.320833	8min
23	0.186889	4min
23	0.437944	2min
23	0.4275	simultaneous
24	0.0772222	heatonly
24	0.399722	lightonly
24	0.254556	8min
24	0.390444	4min
24	0.335667	2min
24	0.232944	simultaneous
25	0.0528889	heatonly
25	0.111222	lightonly
25	0.00994444	8min
25	0.054	4min
25	0.203278	2min
25	0.138	simultaneous
26	0.0517222	heatonly
26	0.259333	lightonly
26	0.0945556	8min
26	0	4min
26	0.362944	2min
26	0.0185	simultaneous
27	0.0209444	heatonly
27	0.438167	lightonly
27	0.244444	8min
27	0.132889	4min
27	0.313389	2min
27	0.113778	simultaneous
28	0.0647778	heatonly
28	0.1695	lightonly
28	0.0193889	8min
28	0.128167	4min
28	0.205222	2min
28	0.2965	simultaneous
29	0.0137778	heatonly
29	0.340722	lightonly
29	0.442	8min
29	0.434333	4min
29	0.299833	2min
29	0.316167	simultaneous
30	0.001	heatonly
30	0.0585556	lightonly
30	0.0375556	8min
30	0.2	4min
30	0.288111	2min
30	0.148944	simultaneous
31	0.0965556	heatonly
31	0.0774444	lightonly
31	0.0982778	8min
31	0.0503333	4min
31	0.193056	2min
31	0.0980556	simultaneous
32	0.0195	heatonly
32	0.182778	lightonly
32	0.2435	8min
32	0.253889	4min
32	0.260333	2min
32	0.244222	simultaneous
33	0.118	heatonly
33	0.423944	lightonly
33	0.0762222	8min
33	0.542333	4min
33	0.329667	2min
33	0.427667	simultaneous
34	0.0476667	heatonly
34	0.206556	lightonly
34	0.00383333	8min
34	0.139722	4min
34	0.0689444	2min
34	0.236222	simultaneous
35	0.0591111	heatonly
35	0.11	lightonly
35	0.180278	8min
35	0.264111	4min
35	0.250333	2min
35	0.342778	simultaneous
36	0.121056	heatonly
36	0.00527778	lightonly
36	0.103278	8min
36	0.0992222	4min
36	0.145833	2min
36	0.0624444	simultaneous
37	0.146556	heatonly
37	0.253778	lightonly
37	0.0922778	8min
37	0.0720556	4min
37	0.256667	2min
37	0.274	simultaneous
38	0.531611	heatonly
38	0.445444	lightonly
38	0.531278	8min
38	0.476944	4min
38	0.463222	2min
38	0.618833	simultaneous
39	0.0952778	heatonly
39	0.0495556	lightonly
39	0.0391667	8min
39	0.0702222	4min
39	0	2min
39	0.0890556	simultaneous
40	0.0488889	heatonly
40	0.1035	lightonly
40	0.0342778	8min
40	0.129944	4min
40	0.303722	2min
40	0.1435	simultaneous
41	0.246222	heatonly
41	0.452556	lightonly
41	0.062	8min
41	0.391056	4min
41	0.232556	2min
41	0.486167	simultaneous
42	0.185556	heatonly
42	0.643667	lightonly
42	0.270167	8min
42	0.24	4min
42	0.470056	2min
42	0.501056	simultaneous
43	0.384556	heatonly
43	0.3215	lightonly
43	0.484278	8min
43	0.445889	4min
43	0.445222	2min
43	0.293222	simultaneous
44	0	heatonly
44	0.105556	lightonly
44	0.152556	8min
44	0.0682778	4min
44	0.429056	2min
44	0.215778	simultaneous
45	0.122833	heatonly
45	0.110611	lightonly
45	0.0818333	8min
45	0.185	4min
45	0.246222	2min
45	0.338722	simultaneous
46	0.4205	heatonly
46	0.3685	lightonly
46	0.1895	8min
46	0.331111	4min
46	0.122722	2min
46	0.449111	simultaneous
47	0.227778	heatonly
47	0.0529444	lightonly
47	0.115111	8min
47	0.316611	4min
47	0.2915	2min
47	0.042	simultaneous
48	0.0915	heatonly
48	0.239833	lightonly
48	0.0983889	8min
48	0.395444	4min
48	0.416	2min
48	0.461	simultaneous
49	0.161111	heatonly
49	0.527889	lightonly
49	0.211389	8min
49	0.616111	4min
49	0.533611	2min
49	0.4885	simultaneous
50	0.197722	heatonly
50	0.105944	lightonly
50	0.399667	8min
50	0.282111	4min
50	0.45	2min
50	0.404222	simultaneous
51	0.00044444	heatonly
51	0	lightonly
51	0	8min
51	0.0482778	4min
51	0	2min
51	0.0118889	simultaneous
52	0.1255	heatonly
52	0.0675556	lightonly
52	0.198889	8min
52	0.0112222	4min
52	0.252	2min
52	0.187667	simultaneous
53	0.0591111	heatonly
53	0.056	lightonly
53	0.0433333	8min
53	0.176333	4min
53	0.255611	2min
53	0.128778	simultaneous
54	0.142222	heatonly
54	0.4955	lightonly
54	0.185778	8min
54	0.2135	4min
54	0.333556	2min
54	0.324111	simultaneous
55	0.175611	heatonly
55	0.326056	lightonly
55	0.335333	8min
55	0.406944	4min
55	0.348111	2min
55	0.481278	simultaneous
56	0.557611	heatonly
56	0.281944	lightonly
56	0.452	8min
56	0.117	4min
56	0.38	2min
56	0.471944	simultaneous
57	0.453667	heatonly
57	0.267444	lightonly
57	0.0771667	8min
57	0.154611	4min
57	0.200556	2min
57	0.155833	simultaneous
58	0.292	heatonly
58	0.447722	lightonly
58	0.0822222	8min
58	0.230833	4min
58	0.404056	2min
58	0.5435	simultaneous
59	0.149889	heatonly
59	0.311556	lightonly
59	0.2535	8min
59	0.175389	4min
59	0.199444	2min
59	0.299556	simultaneous
60	0.2335	heatonly
60	0.410778	lightonly
60	0.339944	8min
60	0.426278	4min
60	0.433056	2min
60	0.238444	simultaneous
61	0.0682222	heatonly
61	0.136278	lightonly
61	0.103278	8min
61	0.135056	4min
61	0.107611	2min
61	0.220278	simultaneous
62	0.0512222	heatonly
62	0.359056	lightonly
62	0.0227222	8min
62	0.145056	4min
62	0.268944	2min
62	0.4175	simultaneous
63	0.0562778	heatonly
63	0.220111	lightonly
63	0.0320556	8min
63	0.130167	4min
63	0.127222	2min
63	0.346	simultaneous
64	0.202389	heatonly
64	0.340611	lightonly
64	0.153278	8min
64	0.312667	4min
64	0.3725	2min
64	0.407278	simultaneous
65	0.492556	heatonly
65	0.668833	lightonly
65	0.579056	8min
65	0.656944	4min
65	0.77	2min
65	0.762389	simultaneous
66	0.209056	heatonly
66	0.244056	lightonly
66	0.276	8min
66	0.401556	4min
66	0.306278	2min
66	0.467944	simultaneous
67	0.100556	heatonly
67	0.0476667	lightonly
67	0.112222	8min
67	0.384333	4min
67	0.168667	2min
67	0.155111	simultaneous
68	0.00777778	heatonly
68	0.327	lightonly
68	0.295667	8min
68	0.318556	4min
68	0.487944	2min
68	0.249333	simultaneous
69	0.255667	heatonly
69	0.176889	lightonly
69	0.427056	8min
69	0.448111	4min
69	0.414833	2min
69	0.392111	simultaneous
70	0.1565	heatonly
70	0.107556	lightonly
70	0.239889	8min
70	0.109889	4min
70	0.266056	2min
70	0.414056	simultaneous
71	0.139611	heatonly
71	0.208	lightonly
71	0.0546111	8min
71	0.113556	4min
71	0.266222	2min
71	0.194111	simultaneous
72	0.143056	heatonly
72	0.106222	lightonly
72	0.253111	8min
72	0.132111	4min
72	0.229167	2min
72	0.226667	simultaneous
73	0.143167	heatonly
73	0.214389	lightonly
73	0.220667	8min
73	0.126056	4min
73	0.0632778	2min
73	0.263111	simultaneous
74	0.145778	heatonly
74	0.177333	lightonly
74	0.228722	8min
74	0.232722	4min
74	0.314833	2min
74	0.247944	simultaneous
75	0.219278	heatonly
75	0.2625	lightonly
75	0.176333	8min
75	0.266167	4min
75	0.2385	2min
75	0.416833	simultaneous
76	0.177778	heatonly
76	0.255889	lightonly
76	0.181278	8min
76	0.239722	4min
76	0.144556	2min
76	0.365889	simultaneous
77	0.0891111	heatonly
77	0.197889	lightonly
77	0.243722	8min
77	0.236889	4min
77	0.359444	2min
77	0.271722	simultaneous
78	0.0428889	heatonly
78	0.00066667	lightonly
78	0.176444	8min
78	0.137778	4min
78	0.0705	2min
78	0.2265	simultaneous
79	0.201722	heatonly
79	0.266389	lightonly
79	0.234222	8min
79	0.0553333	4min
79	0.358556	2min
79	0.369667	simultaneous
80	0.167889	heatonly
80	0.400167	lightonly
80	0.404111	8min
80	0.364278	4min
80	0.395278	2min
80	0.248889	simultaneous
81	0.04	heatonly
81	0.160722	lightonly
81	0.0285	8min
81	0.294278	4min
81	0.131556	2min
81	0.129889	simultaneous
82	0.359222	heatonly
82	0.275778	lightonly
82	0.448944	8min
82	0.2125	4min
82	0.474111	2min
82	0.2875	simultaneous
83	0.131056	heatonly
83	0.382778	lightonly
83	0.271167	8min
83	0.299722	4min
83	0.341056	2min
83	0.459944	simultaneous
84	0.124722	heatonly
84	0.161444	lightonly
84	0.0915556	8min
84	0.197111	4min
84	0.229167	2min
84	0.0917778	simultaneous
85	0.0403333	heatonly
85	0.0688333	lightonly
85	0	8min
85	0.0206111	4min
85	0.0495	2min
85	0.132	simultaneous
86	0.023	heatonly
86	0.0555556	lightonly
86	0.133167	8min
86	0.243111	4min
86	0.272	2min
86	0.224778	simultaneous
87	0.0224444	heatonly
87	0.288222	lightonly
87	0.4215	8min
87	0.362556	4min
87	0.656833	2min
87	0.576444	simultaneous
88	0.069	heatonly
88	0.0868333	lightonly
88	0.167056	8min
88	0.102	4min
88	0.160667	2min
88	0.146167	simultaneous
89	0.0257778	heatonly
89	0.155333	lightonly
89	0.231611	8min
89	0.429278	4min
89	0.384833	2min
89	0.489833	simultaneous
90	0.336778	heatonly
90	0.521611	lightonly
90	0.530222	8min
90	0.582111	4min
90	0.842056	2min
90	0.8415	simultaneous
91	0.352833	heatonly
91	0.497611	lightonly
91	0.347611	8min
91	0.559111	4min
91	0.535278	2min
91	0.357222	simultaneous
92	0.297944	heatonly
92	0.223667	lightonly
92	0.212333	8min
92	0.352778	4min
92	0.227667	2min
92	0.465944	simultaneous
93	0.015	heatonly
93	0.750333	lightonly
93	0.696611	8min
93	0.751222	4min
93	0.713444	2min
93	0.491444	simultaneous
94	0	heatonly
94	0.108056	lightonly
94	0.152556	8min
94	0.206222	4min
94	0.347333	2min
94	0.184611	simultaneous
95	0.05	heatonly
95	0.00627778	lightonly
95	0.349278	8min
95	0.393556	4min
95	0.301944	2min
95	0.159722	simultaneous
96	0.0313889	heatonly
96	0.4155	lightonly
96	0.233389	8min
96	0.433444	4min
96	0.395	2min
96	0.558722	simultaneous
97	0.0415	heatonly
97	0.153944	lightonly
97	0.068	8min
97	0.165444	4min
97	0.246667	2min
97	0.134556	simultaneous
98	0.0665	heatonly
98	0.142333	lightonly
98	0.0786667	8min
98	0.258278	4min
98	0.216111	2min
98	0.213	simultaneous
99	0.0988889	heatonly
99	0.168889	lightonly
99	0.0727222	8min
99	0.214611	4min
99	0.162111	2min
99	0.0777778	simultaneous
100	0.00472222	heatonly
100	0	lightonly
100	0.0259444	8min
100	0.0488333	4min
100	0.138778	2min
100	0	simultaneous
101	0.1875	heatonly
101	0.240778	lightonly
101	0.450833	8min
101	0.365389	4min
101	0.402444	2min
101	0.502556	simultaneous
102	0.0117778	heatonly
102	0.0817222	lightonly
102	0.0423333	8min
102	0.0452778	4min
102	0.210167	2min
102	0.0736667	simultaneous
103	0.0941111	heatonly
103	0.303778	lightonly
103	0.048	8min
103	0.034	4min
103	0.125722	2min
103	0.197389	simultaneous
104	0.340833	heatonly
104	0.215667	lightonly
104	0.0907222	8min
104	0.278889	4min
104	0.348444	2min
104	0.279667	simultaneous
105	0.0217778	heatonly
105	0.0876111	lightonly
105	0.0491111	8min
105	0.0883889	4min
105	0.213278	2min
105	0.300111	simultaneous
106	0.031	heatonly
106	0.2595	lightonly
106	0.0444444	8min
106	0.199	4min
106	0.322833	2min
106	0.0929444	simultaneous
107	0.127667	heatonly
107	0.393389	lightonly
107	0.459611	8min
107	0.362444	4min
107	0.285611	2min
107	0.570833	simultaneous
108	0.0460556	heatonly
108	0.310667	lightonly
108	0.230333	8min
108	0.395889	4min
108	0.416222	2min
108	0.430833	simultaneous
109	0.0345556	heatonly
109	0.0568889	lightonly
109	0.0146111	8min
109	0.233778	4min
109	0.122556	2min
109	0.0764444	simultaneous
110	0.105889	heatonly
110	0.154722	lightonly
110	0.221833	8min
110	0.565722	4min
110	0.512944	2min
110	0.592833	simultaneous

## Sheet: Figure 4F
Figure 4F
mosquito	behavior_prop	stimulus
0	0.259667	heatonly
0	0.0753889	lightonly
0	0.0649444	8min
0	0.1745	4min
0	0.0861667	2min
0	0.0539444	simultaneous
1	0.00411111	heatonly
1	0.025	lightonly
1	0.00372222	8min
1	0.0178889	4min
1	0.0458333	2min
1	0.046	simultaneous
2	0.0576667	heatonly
2	0.0169444	lightonly
2	0.0709444	8min
2	0.157333	4min
2	0.170667	2min
2	0.153333	simultaneous
3	0.0177778	heatonly
3	0.182333	lightonly
3	0.110167	8min
3	0.0435556	4min
3	0.132444	2min
3	0.181889	simultaneous
4	0.00633333	heatonly
4	0.0808889	lightonly
4	0.155167	8min
4	0.0642222	4min
4	0.0516667	2min
4	0.0377222	simultaneous
5	0.0658889	heatonly
5	0.00372222	lightonly
5	0.0335	8min
5	0.0528889	4min
5	0.0515556	2min
5	0.116944	simultaneous
6	0.0535	heatonly
6	0.145111	lightonly
6	0.13	8min
6	0.108611	4min
6	0.1135	2min
6	0.0301111	simultaneous
7	0.166333	heatonly
7	0.196556	lightonly
7	0.0662222	8min
7	0.128111	4min
7	0.1475	2min
7	0.390222	simultaneous
8	0.033	heatonly
8	0.113556	lightonly
8	0	8min
8	0.144167	4min
8	0.0663889	2min
8	0.2415	simultaneous
9	0.122889	heatonly
9	0.0126667	lightonly
9	0.0677222	8min
9	0.0243889	4min
9	0.0398889	2min
9	0.109056	simultaneous
10	0.0343889	heatonly
10	0.0678889	lightonly
10	0.0321667	8min
10	0.006	4min
10	0.121333	2min
10	0.0696111	simultaneous
11	0.00361111	heatonly
11	0.0836111	lightonly
11	0.0145	8min
11	0.0702222	4min
11	0.0310556	2min
11	0.0462222	simultaneous
12	0.00361111	heatonly
12	0.0714444	lightonly
12	0.0118889	8min
12	0.0560556	4min
12	0.200278	2min
12	0.0156667	simultaneous
13	0	heatonly
13	0.086	lightonly
13	0.00383333	8min
13	0.0622222	4min
13	0	2min
13	0.0214444	simultaneous
14	0.275444	heatonly
14	0.112444	lightonly
14	0.0222778	8min
14	0.052	4min
14	0.251444	2min
14	0.111556	simultaneous
15	0.0254444	heatonly
15	0.182667	lightonly
15	0.0506667	8min
15	0.0214444	4min
15	0.0771667	2min
15	0.160611	simultaneous
16	0.0138889	heatonly
16	0.0168889	lightonly
16	0.0332222	8min
16	0.0111111	4min
16	0.0419444	2min
16	0.0372222	simultaneous
17	0.035	heatonly
17	0.0510556	lightonly
17	0.0211111	8min
17	0.07	4min
17	0.117	2min
17	0.0558333	simultaneous
18	0	heatonly
18	0.0993889	lightonly
18	0.0289444	8min
18	0.0318889	4min
18	0.0218889	2min
18	0.118167	simultaneous
19	0.0676111	heatonly
19	0.273111	lightonly
19	0.143278	8min
19	0.215222	4min
19	0.221611	2min
19	0.212	simultaneous
20	0.0430556	heatonly
20	0.0566667	lightonly
20	0.0470556	8min
20	0.00388889	4min
20	0.0290556	2min
20	0.0323333	simultaneous
21	0.0522778	heatonly
21	0.120389	lightonly
21	0.100333	8min
21	0.0577778	4min
21	0.217278	2min
21	0.221722	simultaneous
22	0.00122222	heatonly
22	0.120333	lightonly
22	0.00327778	8min
22	0	4min
22	0.0218889	2min
22	0.0263889	simultaneous
23	0.0555	heatonly
23	0.291611	lightonly
23	0.0402222	8min
23	0.0123333	4min
23	0.0795	2min
23	0.138278	simultaneous
24	0.0456667	heatonly
24	0.122278	lightonly
24	0.115111	8min
24	0.0712222	4min
24	0.0942778	2min
24	0.064	simultaneous
25	0.0065	heatonly
25	0.0945	lightonly
25	0.0199444	8min
25	0.0104444	4min
25	0.0256111	2min
25	0.0887222	simultaneous
26	0.00311111	heatonly
26	0.0556111	lightonly
26	0.0218333	8min
26	0	4min
26	0.0658333	2min
26	0.00683333	simultaneous
27	0.00094444	heatonly
27	0.0691111	lightonly
27	0.0233889	8min
27	0.0324444	4min
27	0.0451111	2min
27	0.0192778	simultaneous
28	0.103556	heatonly
28	0.192278	lightonly
28	0.0445	8min
28	0.0968333	4min
28	0.108111	2min
28	0.197778	simultaneous
29	0.00238889	heatonly
29	0.0325556	lightonly
29	0.144889	8min
29	0.152667	4min
29	0.0358333	2min
29	0.0871111	simultaneous
30	0.00205556	heatonly
30	0.0205	lightonly
30	0.0394444	8min
30	0.0529444	4min
30	0.107778	2min
30	0.062	simultaneous
31	0.053	heatonly
31	0.0246111	lightonly
31	0.0314444	8min
31	0.0306667	4min
31	0.0661667	2min
31	0.0179444	simultaneous
32	0.0148889	heatonly
32	0.107389	lightonly
32	0.149611	8min
32	0.158333	4min
32	0.168333	2min
32	0.126333	simultaneous
33	0.0157778	heatonly
33	0.0242778	lightonly
33	0.00672222	8min
33	0.0805	4min
33	0.0208333	2min
33	0.0455	simultaneous
34	0.028	heatonly
34	0.0983889	lightonly
34	0.0117222	8min
34	0.0698889	4min
34	0.00233333	2min
34	0.125944	simultaneous
35	0.0248333	heatonly
35	0.0678333	lightonly
35	0.200444	8min
35	0.122222	4min
35	0.0502778	2min
35	0.208667	simultaneous
36	0.0235	heatonly
36	0.0005	lightonly
36	0.023	8min
36	0.0436111	4min
36	0.0317222	2min
36	0.00811111	simultaneous
37	0.0293889	heatonly
37	0.172222	lightonly
37	0.0215556	8min
37	0.0423333	4min
37	0.0474444	2min
37	0.109444	simultaneous
38	0.0906111	heatonly
38	0.107389	lightonly
38	0.144667	8min
38	0.110889	4min
38	0.0855556	2min
38	0.1045	simultaneous
39	0.0351667	heatonly
39	0.0298333	lightonly
39	0.00494444	8min
39	0.0370556	4min
39	0	2min
39	0.0364444	simultaneous
40	0.0136111	heatonly
40	0.0426667	lightonly
40	0.0338889	8min
40	0.0349444	4min
40	0.0740556	2min
40	0.0148333	simultaneous
41	0.146333	heatonly
41	0.271444	lightonly
41	0.0292778	8min
41	0.249389	4min
41	0.0901111	2min
41	0.206	simultaneous
42	0.0908889	heatonly
42	0.271333	lightonly
42	0.201722	8min
42	0.124611	4min
42	0.0681111	2min
42	0.162389	simultaneous
43	0.101	heatonly
43	0.158778	lightonly
43	0.163611	8min
43	0.182667	4min
43	0.132778	2min
43	0.0436111	simultaneous
44	0.00983333	heatonly
44	0.0456667	lightonly
44	0.149389	8min
44	0.0901667	4min
44	0.294111	2min
44	0.111167	simultaneous
45	0.0535	heatonly
45	0.0226667	lightonly
45	0.0343333	8min
45	0.0713889	4min
45	0.126111	2min
45	0.121222	simultaneous
46	0.219889	heatonly
46	0.182333	lightonly
46	0.192722	8min
46	0.116556	4min
46	0.0859444	2min
46	0.228833	simultaneous
47	0.188889	heatonly
47	0.0601111	lightonly
47	0.0910556	8min
47	0.258722	4min
47	0.157778	2min
47	0.0317778	simultaneous
48	0.0246667	heatonly
48	0.0491667	lightonly
48	0.0095	8min
48	0.0955556	4min
48	0.0831111	2min
48	0.0883889	simultaneous
49	0.203222	heatonly
49	0.288556	lightonly
49	0.171222	8min
49	0.305167	4min
49	0.419111	2min
49	0.168222	simultaneous
50	0.116167	heatonly
50	0.0771667	lightonly
50	0.139056	8min
50	0.254667	4min
50	0.179944	2min
50	0.193722	simultaneous
51	0.00033333	heatonly
51	0.00538889	lightonly
51	0.002	8min
51	0.0301667	4min
51	0.00305556	2min
51	0.0065	simultaneous
52	0.0431111	heatonly
52	0.0451111	lightonly
52	0.0514444	8min
52	0	4min
52	0.0827222	2min
52	0.166056	simultaneous
53	0.0379444	heatonly
53	0.0926667	lightonly
53	0.01	8min
53	0.143444	4min
53	0.0742222	2min
53	0.0605	simultaneous
54	0.0335556	heatonly
54	0.0911111	lightonly
54	0.0732222	8min
54	0.0544444	4min
54	0.0687778	2min
54	0.0904444	simultaneous
55	0.0777222	heatonly
55	0.137611	lightonly
55	0.193667	8min
55	0.187389	4min
55	0.235611	2min
55	0.129889	simultaneous
56	0.257556	heatonly
56	0.110556	lightonly
56	0.265667	8min
56	0.0293889	4min
56	0.206056	2min
56	0.141167	simultaneous
57	0.156667	heatonly
57	0.0916111	lightonly
57	0.0267222	8min
57	0.0834444	4min
57	0.0642222	2min
57	0.0627778	simultaneous
58	0.228167	heatonly
58	0.238833	lightonly
58	0.0215556	8min
58	0.0374444	4min
58	0.207222	2min
58	0.169444	simultaneous
59	0.0364444	heatonly
59	0.0664444	lightonly
59	0.0455556	8min
59	0.0533333	4min
59	0.061	2min
59	0.0767222	simultaneous
60	0.0213333	heatonly
60	0.155722	lightonly
60	0.0940556	8min
60	0.0915	4min
60	0.173333	2min
60	0.037	simultaneous
61	0.0184444	heatonly
61	0.0525556	lightonly
61	0.0536667	8min
61	0.185944	4min
61	0.0553889	2min
61	0.065	simultaneous
62	0.0431667	heatonly
62	0.207389	lightonly
62	0.00861111	8min
62	0.0880556	4min
62	0.1355	2min
62	0.190667	simultaneous
63	0.0127778	heatonly
63	0.0221111	lightonly
63	0.0111667	8min
63	0.0364444	4min
63	0.0242222	2min
63	0.0578333	simultaneous
64	0.0638889	heatonly
64	0.127722	lightonly
64	0.0526111	8min
64	0.0319444	4min
64	0.097	2min
64	0.111444	simultaneous
65	0.225556	heatonly
65	0.396611	lightonly
65	0.188222	8min
65	0.174944	4min
65	0.353278	2min
65	0.305444	simultaneous
66	0.1265	heatonly
66	0.131667	lightonly
66	0.218722	8min
66	0.151389	4min
66	0.0776111	2min
66	0.156333	simultaneous
67	0.0208333	heatonly
67	0.0272222	lightonly
67	0.0404444	8min
67	0.100222	4min
67	0.079	2min
67	0.0182778	simultaneous
68	0.00055556	heatonly
68	0.0908333	lightonly
68	0.102444	8min
68	0.162278	4min
68	0.296833	2min
68	0.0771667	simultaneous
69	0.125778	heatonly
69	0.078	lightonly
69	0.153722	8min
69	0.125222	4min
69	0.150222	2min
69	0.105222	simultaneous
70	0.104167	heatonly
70	0.0213333	lightonly
70	0.0915556	8min
70	0.00694444	4min
70	0.191167	2min
70	0.256667	simultaneous
71	0.0771667	heatonly
71	0.0274444	lightonly
71	0.00405556	8min
71	0.0448889	4min
71	0.0475	2min
71	0.0366667	simultaneous
72	0.0726667	heatonly
72	0.0605	lightonly
72	0.116056	8min
72	0.0890556	4min
72	0.162222	2min
72	0.189389	simultaneous
73	0.0476667	heatonly
73	0.0648333	lightonly
73	0.0352778	8min
73	0.0264444	4min
73	0.0115556	2min
73	0.118833	simultaneous
74	0.0954444	heatonly
74	0.191278	lightonly
74	0.1865	8min
74	0.122722	4min
74	0.234167	2min
74	0.208111	simultaneous
75	0.186944	heatonly
75	0.176722	lightonly
75	0.0342778	8min
75	0.116389	4min
75	0.104556	2min
75	0.323722	simultaneous
76	0.0871111	heatonly
76	0.0853889	lightonly
76	0.0594444	8min
76	0.0688889	4min
76	0.0326667	2min
76	0.203778	simultaneous
77	0.0656111	heatonly
77	0.0887222	lightonly
77	0.106444	8min
77	0.0857222	4min
77	0.151944	2min
77	0.1335	simultaneous
78	0.00955556	heatonly
78	0.00038889	lightonly
78	0.0735556	8min
78	0.0432778	4min
78	0.0264444	2min
78	0.0554444	simultaneous
79	0.0690556	heatonly
79	0.0723889	lightonly
79	0.114667	8min
79	0.033	4min
79	0.0865	2min
79	0.139944	simultaneous
80	0.0701111	heatonly
80	0.129333	lightonly
80	0.106556	8min
80	0.0793889	4min
80	0.0963889	2min
80	0.159556	simultaneous
81	0.089	heatonly
81	0.0573889	lightonly
81	0.00405556	8min
81	0.145611	4min
81	0.103222	2min
81	0.112	simultaneous
82	0.0688889	heatonly
82	0.0911111	lightonly
82	0.0720556	8min
82	0.0686667	4min
82	0.101778	2min
82	0.0737222	simultaneous
83	0.0243889	heatonly
83	0.101278	lightonly
83	0.0422222	8min
83	0.0513889	4min
83	0.134833	2min
83	0.181389	simultaneous
84	0.0147778	heatonly
84	0.0382778	lightonly
84	0.0141667	8min
84	0.0327778	4min
84	0.0237222	2min
84	0.0171667	simultaneous
85	0.0828333	heatonly
85	0.0355	lightonly
85	0	8min
85	0.00666667	4min
85	0.00483333	2min
85	0.0811111	simultaneous
86	0.129778	heatonly
86	0.0517222	lightonly
86	0.0876667	8min
86	0.134778	4min
86	0.131556	2min
86	0.0936667	simultaneous
87	0.00083333	heatonly
87	0.0235556	lightonly
87	0.0783889	8min
87	0.0798333	4min
87	0.231667	2min
87	0.079	simultaneous
88	0.0242222	heatonly
88	0.0103889	lightonly
88	0.0416111	8min
88	0.0489444	4min
88	0.0298889	2min
88	0.0401667	simultaneous
89	0.0335	heatonly
89	0.0468333	lightonly
89	0.0321111	8min
89	0.101556	4min
89	0.116944	2min
89	0.0548333	simultaneous
90	0.0281111	heatonly
90	0.0383889	lightonly
90	0.0691667	8min
90	0.138167	4min
90	0.230778	2min
90	0.137167	simultaneous
91	0.1035	heatonly
91	0.123389	lightonly
91	0.0274444	8min
91	0.132889	4min
91	0.102222	2min
91	0.0833333	simultaneous
92	0.145778	heatonly
92	0.107944	lightonly
92	0.159778	8min
92	0.0960556	4min
92	0.0978889	2min
92	0.192167	simultaneous
93	0.0142222	heatonly
93	0.372389	lightonly
93	0.4525	8min
93	0.469056	4min
93	0.432222	2min
93	0.27	simultaneous
94	0.00644444	heatonly
94	0.0475	lightonly
94	0.0565	8min
94	0.0919444	4min
94	0.215056	2min
94	0.0905556	simultaneous
95	0.0327778	heatonly
95	0	lightonly
95	0.102333	8min
95	0.156944	4min
95	0.103278	2min
95	0.0266667	simultaneous
96	0.0333889	heatonly
96	0.185222	lightonly
96	0.0656111	8min
96	0.290833	4min
96	0.103944	2min
96	0.303167	simultaneous
97	0.0103333	heatonly
97	0.0403889	lightonly
97	0.0333889	8min
97	0.0452778	4min
97	0.0612222	2min
97	0.0351667	simultaneous
98	0.0180556	heatonly
98	0.0403889	lightonly
98	0.0804444	8min
98	0.0916111	4min
98	0.0552778	2min
98	0.0531667	simultaneous
99	0.0136667	heatonly
99	0.0168333	lightonly
99	0.0161667	8min
99	0.100111	4min
99	0.125667	2min
99	0.00622222	simultaneous
100	0.00138889	heatonly
100	0	lightonly
100	0.116944	8min
100	0.0508889	4min
100	0.0415	2min
100	0.0270556	simultaneous
101	0.0556111	heatonly
101	0.145167	lightonly
101	0.3	8min
101	0.221444	4min
101	0.195944	2min
101	0.250611	simultaneous
102	0.0682778	heatonly
102	0.168444	lightonly
102	0.0470556	8min
102	0.0376667	4min
102	0.134778	2min
102	0.0332222	simultaneous
103	0.0299444	heatonly
103	0.100222	lightonly
103	0.017	8min
103	0.02	4min
103	0.0438889	2min
103	0.0665556	simultaneous
104	0.0684444	heatonly
104	0.0371111	lightonly
104	0.00888889	8min
104	0.0547222	4min
104	0.0538889	2min
104	0.0793889	simultaneous
105	0.0460556	heatonly
105	0.0278889	lightonly
105	0.0133333	8min
105	0.0879444	4min
105	0.148389	2min
105	0.146111	simultaneous
106	0.0112778	heatonly
106	0.152111	lightonly
106	0.149778	8min
106	0.113278	4min
106	0.128056	2min
106	0.0585	simultaneous
107	0.0231111	heatonly
107	0.115222	lightonly
107	0.203333	8min
107	0.0778333	4min
107	0.0976111	2min
107	0.120722	simultaneous
108	0.0698333	heatonly
108	0.0206667	lightonly
108	0.044	8min
108	0.126167	4min
108	0.103056	2min
108	0.0791111	simultaneous
109	0.00638889	heatonly
109	0.0403333	lightonly
109	0.0761667	8min
109	0.0775556	4min
109	0.0846111	2min
109	0.0292222	simultaneous
110	0.0703889	heatonly
110	0.132167	lightonly
110	0.0715556	8min
110	0.356667	4min
110	0.238167	2min
110	0.327278	simultaneous

## Sheet: Figure 4I
Figure 4I
day	trial	type	engorged	total	proportion
1	2	Light-Heat 3 min	3	14	0.214286
1	5	Light-Heat 3 min	6	14	0.428571
1	8	Light-Heat 3 min	10	14	0.714286
2	14	Light-Heat 3 min	7	14	0.5
2	17	Light-Heat 3 min	9	14	0.642857
3	20	Light-Heat 3 min	7	14	0.5
3	21	Light-Heat 3 min	6	14	0.428571
3	24	Light-Heat 3 min	11	14	0.785714
3	27	Light-Heat 3 min	5	14	0.357143
1	1	Light-Heat 10 min	6	14	0.428571
1	4	Light-Heat 10 min	7	14	0.5
1	7	Light-Heat 10 min	12	14	0.857143
2	10	Light-Heat 10 min	10	14	0.714286
2	13	Light-Heat 10 min	11	14	0.785714
2	16	Light-Heat 10 min	12	14	0.857143
3	19	Light-Heat 10 min	12	14	0.857143
3	23	Light-Heat 10 min	13	14	0.928571
3	26	Light-Heat 10 min	10	14	0.714286
1	3	Heat 3 min-Light	2	14	0.142857
1	6	Heat 3 min-Light	2	14	0.142857
1	9	Heat 3 min-Light	5	14	0.357143
2	12	Heat 3 min-Light	2	14	0.142857
2	15	Heat 3 min-Light	6	14	0.428571
2	18	Heat 3 min-Light	3	13	0.230769
3	22	Heat 3 min-Light	0	14	0
3	25	Heat 3 min-Light	1	14	0.0714286
3	28	Heat 3 min-Light	4	14	0.285714

## Sheet: Figure 4J
Figure 4J
stimulus	proportion engorged		stimulus	difference from (heat only + light only)
light only	0		20 minutes	0
light only	0		20 minutes	-0.142857
light only	0		20 minutes	-0.0714286
light only	0		20 minutes	-0.0714286
light only	0		20 minutes	-0.0714286
light only	0		20 minutes	0.142857
light only	0		20 minutes	0.214286
light only	0		20 minutes	-0.0714286
light only	0.0714286		20 minutes	0.214286
light only	0		20 minutes	0.5
light only	0		20 minutes	0
light only	0		20 minutes	0.0714286
heat only	0.214286		14 minutes	-0.142857
heat only	0.142857		14 minutes	-0.0714286
heat only	0.0714286		14 minutes	0.142857
heat only	0.142857		14 minutes	0.285714
heat only	0.0714286		14 minutes	0.142857
heat only	0		14 minutes	0.142857
heat only	0		14 minutes	0.142857
heat only	0.0714286		14 minutes	0.285714
heat only	0.142857		14 minutes	0
heat only	0.0714286		14 minutes	0.214286
heat only	0.0714286		14 minutes	0.0714286
heat only	0.0714286		14 minutes	0.142857
20minutes	0.214286		8 minutes	0.142857
20minutes	0		8 minutes	0
20minutes	0		8 minutes	0.214286
20minutes	0.0714286		8 minutes	0
20minutes	0		8 minutes	0.142857
20minutes	0.142857		8 minutes	0.0714286
20minutes	0.214286		8 minutes	0
20minutes	0		8 minutes	0.428571
20minutes	0.428571		8 minutes	0.357143
20minutes	0.571429		8 minutes	0.214286
20minutes	0.0714286		8 minutes	0.0714286
20minutes	0.142857		8 minutes	0.285714
14minutes	0.0714286		2 minutes	0.285714
14minutes	0.0714286		2 minutes	0
14minutes	0.214286		2 minutes	0.0714286
14minutes	0.428571		2 minutes	0.142857
14minutes	0.214286		2 minutes	0.428571
14minutes	0.142857		2 minutes	0.307692
14minutes	0.142857		2 minutes	0.285714
14minutes	0.357143		2 minutes	0.428571
14minutes	0.214286		2 minutes	0.142857
14minutes	0.285714		2 minutes	0.428571
14minutes	0.142857		2 minutes	0.357143
14minutes	0.214286		2 minutes	0.285714
8minutes	0.357143		simultaneous	0.571429
8minutes	0.142857		simultaneous	0.285714
8minutes	0.285714		simultaneous	0.357143
8minutes	0.142857		simultaneous	0.0714286
8minutes	0.214286		simultaneous	0.313187
8minutes	0.0714286		simultaneous	0.357143
8minutes	0		simultaneous	0.357143
8minutes	0.5		simultaneous	0.571429
8minutes	0.571429		simultaneous	0.285714
8minutes	0.285714		simultaneous	0.428571
8minutes	0.142857		simultaneous	0.571429
8minutes	0.357143		simultaneous	0.357143
2minutes	0.5
2minutes	0.142857
2minutes	0.142857
2minutes	0.285714
2minutes	0.5
2minutes	0.307692
2minutes	0.285714
2minutes	0.5
2minutes	0.357143
2minutes	0.5
2minutes	0.428571
2minutes	0.357143
simultaneous	0.785714
simultaneous	0.428571
simultaneous	0.428571
simultaneous	0.214286
simultaneous	0.384615
simultaneous	0.357143
simultaneous	0.357143
simultaneous	0.642857
simultaneous	0.5
simultaneous	0.5
simultaneous	0.642857
simultaneous	0.428571

## Sheet: Figure 4K
Figure 4K
Behavior	Proportion of time	State		Transitions
groomBB	0.057683	Engorge
groomBB	0.0752485	Local Search
groomBB	0.0754783	Global Search		Engorge		TO
groomBB	0.611734	Rest				fly	probe	walk	groom	none
walk_BB	0.00498896	Engorge		FROM	none	0.0010321	0.866166	0.015033	0.0495429
walk_BB	0.382842	Local Search			groom	0	0.092565	0.00131136		0.155991
walk_BB	0.403906	Global Search			walk	7.09e-05	0.0402446		0.00330793	0.0570323
walk_BB	0.0249213	Rest			probe	0.000413492		0.0134006	0.0383629	0.902634
probeBB	0.845955	Engorge			fly		0.000708843	0.000708843	0	0.00248095
probeBB	0.25698	Local Search
probeBB	0.0835829	Global Search
probeBB	0.0509026	Rest		Local Search		TO
fly2	4.0562e-05	Engorge				fly	probe	walk	groom	none
fly2	0.00331706	Local Search		FROM	none	0.0477684	0.266226	1.18326	0.376175
fly2	0.0385957	Global Search			groom	0.00564852	0.0586514	0.195659		1.02177
fly2	0.00033365	Rest			walk	0.0188426	0.578062		0.0818422	1.2141
none	0.147969	Engorge			probe	0.00637032		1.08611	0.0359318	0.47047
none	0.381029	Local Search			fly		0.0134736	0.0483982	0.0195863	0.242706
none	0.46	Global Search
none	0.347523	Rest		Global Search		TO
						fly	probe	walk	groom	none
				FROM	none	0.361246	0.127303	1.13691	0.373251
					groom	0.0296668	0.0306937	0.22612		1.20789
					walk	0.126661	0.349163		0.0899214	1.38848
					probe	0.0329663		1.01625	0.0272581	0.389192
					fly		0.0534499	0.165534	0.111772	1.65722
				Rest		TO
						fly	probe	walk	groom	none
				FROM	none	0.00388109	0.110387	0.094225	1.70274
					groom	0.0023999	0.159751	0.196071		1.60397
					walk	0.00164459	0.0312191		0.536705	0.330644
					probe	0.000957442		0.0374638	0.310298	0.251423
					fly		0.00177603	0.00127134	0.0131483	0.0195944

## Sheet: Figure 4L
Figure 4L
Unfed Mosquitoes
mosquito 1
Local Search starts	-589.5	-269.5	-199.5	-29.5	90.5	210.5	230.5	330.5	460.5	580.5
Local Search stops	-529.5	-239.5	-189.5	0.5	130.5	220.5	260.5	430.5	540.5	590.5
Engorge starts	220.5	260.5	320.5
Engorge stops	230.5	290.5	330.5
Global Search starts	-599.5	-389.5	-229.5	-169.5	-139.5	40.5	130.5	290.5	430.5	540.5	590.5
Global Search stops	-589.5	-369.5	-199.5	-159.5	-29.5	80.5	210.5	320.5	460.5	580.5	600.5
Rest starts	-159.5
Rest stops	-139.5
mosquito 2
Local Search starts	-110.8	89.2	339.2
Local Search stops	19.2	119.2	349.2
Engorge starts	-260.8
Engorge stops	-250.8
Global Search starts	-140.8	19.2	119.2	349.2
Global Search stops	-110.8	89.2	339.2	479.2
Rest starts	-580.8	-250.8	479.2	519.2
Rest stops	-260.8	-140.8	509.2	599.2
mosquito 3
Local Search starts	-532.5	-112.5	-42.5	87.5	197.5	297.5	367.5	587.5
Local Search stops	-512.5	-72.5	57.5	97.5	237.5	327.5	447.5	597.5
Engorge starts
Engorge stops
Global Search starts	-562.5	-142.5	-62.5	57.5	97.5	237.5	327.5	497.5
Global Search stops	-532.5	-112.5	-42.5	87.5	197.5	297.5	337.5	557.5
Rest starts	-602.5	-512.5
Rest stops	-562.5	-502.5
mosquito 4
Local Search starts	-114.167	-14.1667	95.8333	155.833	225.833	385.833
Local Search stops	-34.1667	5.83333	125.833	165.833	255.833	445.833
Engorge starts
Engorge stops
Global Search starts	-134.167	5.83333	65.8333	125.833	145.833	165.833	255.833	355.833	445.833
Global Search stops	-114.167	55.8333	95.8333	135.833	155.833	205.833	295.833	385.833	475.833
Rest starts	205.833
Rest stops	215.833
mosquito 5
Local Search starts	-95.0333	-15.0333	44.9667	264.967
Local Search stops	-35.0333	14.9667	94.9667	324.967
Engorge starts
Engorge stops
Global Search starts	-135.033	94.9667	244.967	324.967
Global Search stops	-105.033	104.967	264.967	344.967
Rest starts	-595.033
Rest stops	-515.033
mosquito 6
Local Search starts	-112.733	-42.7333
Local Search stops	-72.7333	27.2667
Engorge starts	27.2667
Engorge stops	147.267
Global Search starts	-132.733	-72.7333
Global Search stops	-112.733	-42.7333
Rest starts
Rest stops
mosquito 7
Local Search starts	-279.5	-199.5	-149.5	-9.5	120.5	350.5	500.5	570.5
Local Search stops	-239.5	-179.5	-139.5	20.5	180.5	360.5	520.5	600.5
Engorge starts
Engorge stops
Global Search starts	-359.5	-239.5	-179.5	-139.5	20.5	180.5	360.5	470.5
Global Search stops	-279.5	-199.5	-149.5	-109.5	120.5	320.5	390.5	500.5
Rest starts	-79.5	430.5	460.5
Rest stops	-49.5	450.5	470.5
mosquito 8
Local Search starts	-602.733	-102.733	27.2667	87.2667	187.267	267.267
Local Search stops	-572.733	-52.7333	37.2667	157.267	197.267	287.267
Engorge starts
Engorge stops
Global Search starts	-2.73333	157.267	227.267	287.267	327.267	437.267
Global Search stops	27.2667	187.267	267.267	307.267	367.267	457.267
Rest starts	-52.7333
Rest stops	-2.73333
mosquito 9
Local Search starts	-99.5	50.5	110.5
Local Search stops	-29.5	60.5	120.5
Engorge starts
Engorge stops
Global Search starts	60.5	120.5
Global Search stops	80.5	240.5
Rest starts	-599.5	-19.5	40.5
Rest stops	-549.5	10.5	50.5
mosquito 10
Local Search starts	-104.167	175.833
Local Search stops	-34.1667	195.833
Engorge starts
Engorge stops
Global Search starts	-134.167	5.83333	235.833
Global Search stops	-104.167	175.833	255.833
Rest starts	-534.167	195.833
Rest stops	-424.167	205.833
mosquito 11
Local Search starts	-105.033	-25.0333	424.967
Local Search stops	-55.0333	-5.03333	444.967
Engorge starts
Engorge stops
Global Search starts	-135.033	-35.0333	-5.03333	364.967	444.967
Global Search stops	-105.033	-25.0333	244.967	424.967	514.967
Rest starts	244.967
Rest stops	324.967
mosquito 12
Local Search starts	-112.5	-62.5	107.5	237.5	437.5
Local Search stops	-82.5	-22.5	207.5	257.5	467.5
Engorge starts
Engorge stops
Global Search starts	-142.5	17.5	207.5
Global Search stops	-112.5	107.5	227.5
Rest starts	-602.5	-382.5	-332.5	-232.5	-162.5
Rest stops	-552.5	-362.5	-242.5	-182.5	-142.5
mosquito 13
Local Search starts	-433.167	-123.167	6.83333
Local Search stops	-403.167	-83.1667	36.8333
Engorge starts
Engorge stops
Global Search starts	-23.1667	36.8333
Global Search stops	6.83333	106.833
Rest starts	-403.167	-303.167	-83.1667
Rest stops	-383.167	-293.167	-23.1667
mosquito 14
Local Search starts	-72.5	7.5	87.5	487.5
Local Search stops	-12.5	57.5	97.5	497.5
Engorge starts
Engorge stops
Global Search starts	-142.5	57.5	97.5	497.5
Global Search stops	-112.5	87.5	487.5	597.5
Rest starts
Rest stops
mosquito 15
Local Search starts	-85.0333	-35.0333
Local Search stops	-65.0333	14.9667
Engorge starts
Engorge stops
Global Search starts	-65.0333	14.9667
Global Search stops	-35.0333	134.967
Rest starts
Rest stops
mosquito 16
Local Search starts	-92.7333	-2.73333	107.267
Local Search stops	-32.7333	97.2667	127.267
Engorge starts	97.2667
Engorge stops	107.267
Global Search starts	-142.733	-32.7333	127.267
Global Search stops	-92.7333	-2.73333	147.267
Rest starts	-602.733	-152.733
Rest stops	-592.733	-142.733
mosquito 17
Local Search starts	-99.2	-29.2	40.8	110.8	370.8
Local Search stops	-69.2	10.8	50.8	120.8	380.8
Engorge starts
Engorge stops
Global Search starts	50.8	120.8	390.8
Global Search stops	110.8	370.8	600.8
Rest starts	10.8
Rest stops	20.8
mosquito 18
Local Search starts	-99.2	-69.2	-9.2	70.8	590.8
Local Search stops	-79.2	-39.2	20.8	90.8	600.8
Engorge starts
Engorge stops
Global Search starts	-119.2	40.8	90.8	560.8
Global Search stops	-99.2	70.8	300.8	590.8
Rest starts	20.8
Rest stops	40.8
mosquito 19
Local Search starts	-102.967	87.0333	187.033	307.033	587.033
Local Search stops	-42.9667	107.033	197.033	337.033	597.033
Engorge starts
Engorge stops
Global Search starts	-142.967	37.0333	107.033	217.033	277.033	337.033	377.033
Global Search stops	-102.967	87.0333	187.033	237.033	307.033	367.033	587.033
Rest starts	-602.967	267.033	367.033
Rest stops	-552.967	277.033	377.033
mosquito 20
Local Search starts	-102.967	-2.96667	47.0333	97.0333	127.033	177.033	297.033	377.033	457.033	517.033
Local Search stops	-42.9667	7.03333	57.0333	107.033	147.033	257.033	317.033	387.033	477.033	587.033
Engorge starts
Engorge stops
Global Search starts	-142.967	-42.9667	-22.9667	57.0333	147.033	257.033	317.033	397.033	497.033	587.033
Global Search stops	-102.967	-32.9667	-12.9667	97.0333	177.033	297.033	327.033	407.033	517.033	597.033
Rest starts	-602.967	-442.967	-262.967	-12.9667	387.033
Rest stops	-542.967	-412.967	-142.967	-2.96667	397.033
mosquito 21
Local Search starts	-109.167	10.8333	110.833	180.833
Local Search stops	-49.1667	80.8333	140.833	270.833
Engorge starts
Engorge stops
Global Search starts	-139.167	-49.1667	80.8333	270.833
Global Search stops	-109.167	0.833333	110.833	290.833
Rest starts	-229.167
Rest stops	-139.167
mosquito 22
Local Search starts	-577.333	-517.333	142.667	212.667	312.667
Local Search stops	-547.333	-487.333	172.667	262.667	362.667
Engorge starts
Engorge stops
Global Search starts	-597.333	-477.333	72.6667
Global Search stops	-577.333	-447.333	82.6667
Rest starts	-227.333	202.667	262.667	292.667
Rest stops	-187.333	212.667	282.667	302.667
mosquito 23
Local Search starts	-95.0333	-65.0333	-25.0333	14.9667	164.967	284.967	354.967	394.967	504.967	544.967
Local Search stops	-85.0333	-55.0333	4.96667	34.9667	184.967	304.967	364.967	404.967	514.967	564.967
Engorge starts	184.967
Engorge stops	254.967
Global Search starts	-135.033	34.9667	254.967	304.967	364.967	404.967	514.967
Global Search stops	-95.0333	134.967	284.967	354.967	394.967	484.967	544.967
Rest starts	-225.033
Rest stops	-215.033
mosquito 24
Local Search starts	-37.3333	552.667	592.667
Local Search stops	32.6667	562.667	602.667
Engorge starts	542.667
Engorge stops	552.667
Global Search starts	-77.3333	562.667
Global Search stops	-37.3333	592.667
Rest starts	-597.333	-447.333
Rest stops	-457.333	-277.333
mosquito 25
Local Search starts	-39.2	60.8	170.8	200.8
Local Search stops	30.8	70.8	190.8	220.8
Engorge starts
Engorge stops
Global Search starts	-139.2	30.8	130.8	220.8
Global Search stops	-39.2	60.8	170.8	340.8
Rest starts	400.8
Rest stops	430.8
mosquito 26
Local Search starts	-39.2	60.8	110.8	470.8
Local Search stops	20.8	80.8	140.8	490.8
Engorge starts
Engorge stops
Global Search starts	-139.2	20.8	80.8	140.8	350.8	490.8
Global Search stops	-39.2	60.8	110.8	250.8	470.8	580.8
Rest starts
Rest stops
mosquito 27
Local Search starts	-89.2	-49.2	200.8	290.8
Local Search stops	-69.2	-29.2	210.8	300.8
Engorge starts
Engorge stops
Global Search starts	-119.2	210.8	330.8	400.8	520.8
Global Search stops	-99.2	290.8	380.8	510.8	530.8
Rest starts	-599.2
Rest stops	-189.2
mosquito 28
Local Search starts	-90.8	39.2	119.2	179.2	269.2	339.2	449.2	579.2
Local Search stops	-50.8	89.2	149.2	209.2	299.2	359.2	519.2	589.2
Engorge starts
Engorge stops
Global Search starts	-130.8	89.2	149.2	209.2	299.2	359.2	519.2	589.2
Global Search stops	-100.8	119.2	179.2	269.2	339.2	449.2	529.2	599.2
Rest starts	-50.8
Rest stops	29.2
mosquito 29
Local Search starts	-109.167	20.8333	100.833	340.833	410.833	450.833
Local Search stops	-69.1667	70.8333	220.833	350.833	430.833	470.833
Engorge starts
Engorge stops
Global Search starts	220.833	310.833	570.833
Global Search stops	250.833	340.833	600.833
Rest starts	-599.167	-59.1667	250.833
Rest stops	-119.167	20.8333	310.833
mosquito 30
Local Search starts	-37.3333	52.6667	112.667	562.667
Local Search stops	-7.33333	82.6667	122.667	602.667
Engorge starts	-557.333
Engorge stops	-547.333
Global Search starts	-7.33333	82.6667
Global Search stops	52.6667	112.667
Rest starts	-237.333
Rest stops	-217.333
mosquito 31
Local Search starts	-53.1667	6.83333	126.833
Local Search stops	-23.1667	76.8333	136.833
Engorge starts
Engorge stops
Global Search starts	-133.167	-23.1667	76.8333	136.833
Global Search stops	-103.167	6.83333	116.833	156.833
Rest starts	166.833	356.833
Rest stops	296.833	596.833
mosquito 32
Local Search starts	-72.9667	227.033	327.033	567.033
Local Search stops	-42.9667	237.033	347.033	587.033
Engorge starts	437.033
Engorge stops	467.033
Global Search starts	-112.967	-42.9667	237.033	347.033	467.033	587.033
Global Search stops	-72.9667	227.033	327.033	367.033	567.033	597.033
Rest starts
Rest stops
mosquito 33
Local Search starts	-83.1667	86.8333	236.833	386.833	466.833
Local Search stops	-53.1667	96.8333	246.833	406.833	476.833
Engorge starts
Engorge stops
Global Search starts	-143.167	16.8333	196.833	326.833
Global Search stops	-83.1667	86.8333	236.833	386.833
Rest starts	96.8333	476.833
Rest stops	106.833	596.833
mosquito 34
Local Search starts	-92.5	-62.5	-2.5	87.5	267.5
Local Search stops	-72.5	-52.5	17.5	117.5	307.5
Engorge starts
Engorge stops
Global Search starts	-22.5	17.5	117.5	307.5
Global Search stops	-2.5	87.5	247.5	337.5
Rest starts
Rest stops
mosquito 35
Local Search starts	-99.1667	-79.1667	20.8333	170.833
Local Search stops	-89.1667	-59.1667	30.8333	190.833
Engorge starts
Engorge stops
Global Search starts	30.8333	150.833	190.833
Global Search stops	120.833	170.833	260.833
Rest starts	-599.167	-89.1667	-59.1667	0.833333	590.833
Rest stops	-309.167	-79.1667	-39.1667	20.8333	600.833
mosquito 36
Local Search starts	-99.2	-9.2	550.8
Local Search stops	-79.2	30.8	570.8
Engorge starts
Engorge stops
Global Search starts	-109.2	-79.2
Global Search stops	-99.2	-9.2
Rest starts	570.8
Rest stops	600.8
mosquito 37
Local Search starts	-112.967	-52.9667	-12.9667	167.033	257.033	307.033	537.033
Local Search stops	-102.967	-42.9667	137.033	187.033	267.033	327.033	547.033
Engorge starts
Engorge stops
Global Search starts	-142.967	-42.9667	137.033	187.033	217.033	267.033	347.033	547.033
Global Search stops	-112.967	-12.9667	167.033	207.033	257.033	307.033	387.033	597.033
Rest starts	337.033
Rest stops	347.033
mosquito 38
Local Search starts	-113.167	46.8333	136.833
Local Search stops	-83.1667	66.8333	166.833
Engorge starts
Engorge stops
Global Search starts	-143.167	16.8333	66.8333
Global Search stops	-113.167	46.8333	136.833
Rest starts	-563.167	-483.167	-423.167	-313.167	-283.167	-83.1667
Rest stops	-493.167	-443.167	-353.167	-303.167	-233.167	-33.1667
mosquito 39
Local Search starts	-32.5
Local Search stops	-12.5
Engorge starts
Engorge stops
Global Search starts	-132.5	-12.5	127.5	557.5
Global Search stops	-102.5	107.5	217.5	597.5
Rest starts	-72.5	247.5
Rest stops	-42.5	277.5
mosquito 40
Local Search starts	-54.1667	-34.1667	175.833	215.833	255.833	295.833
Local Search stops	-44.1667	-24.1667	185.833	225.833	265.833	305.833
Engorge starts
Engorge stops
Global Search starts	-134.167	-4.16667	65.8333	85.8333	185.833
Global Search stops	-104.167	45.8333	75.8333	145.833	215.833
Rest starts	-44.1667	555.833
Rest stops	-34.1667	575.833
mosquito 41
Local Search starts	-57.3667	12.6333	162.633
Local Search stops	-37.3667	62.6333	172.633
Engorge starts	-387.367	-347.367
Engorge stops	-367.367	-327.367
Global Search starts	-137.367	-37.3667	62.6333	172.633
Global Search stops	-57.3667	12.6333	162.633	292.633
Rest starts	-597.367	-367.367
Rest stops	-387.367	-347.367
mosquito 42
Local Search starts	-69.2	120.8	320.8	360.8	450.8	550.8
Local Search stops	-49.2	170.8	330.8	380.8	520.8	590.8
Engorge starts	-419.2	-369.2	-219.2	-189.2
Engorge stops	-399.2	-229.2	-209.2	-159.2
Global Search starts	-49.2	-19.2	60.8	170.8	330.8	380.8	430.8	520.8	590.8
Global Search stops	-39.2	50.8	120.8	310.8	360.8	410.8	450.8	550.8	600.8
Rest starts
Rest stops
mosquito 43
Local Search starts	-69.2	20.8	60.8	380.8	440.8
Local Search stops	-49.2	30.8	80.8	390.8	450.8
Engorge starts
Engorge stops
Global Search starts	-129.2	-9.2	30.8	90.8	270.8	390.8	450.8	530.8
Global Search stops	-99.2	0.8	50.8	210.8	380.8	420.8	520.8	600.8
Rest starts	0.8	210.8
Rest stops	20.8	220.8
mosquito 44
Local Search starts	-90.8	-0.8	549.2
Local Search stops	-70.8	29.2	579.2
Engorge starts
Engorge stops
Global Search starts	-120.8	-40.8	29.2	409.2	579.2
Global Search stops	-90.8	-10.8	399.2	499.2	599.2
Rest starts
Rest stops
mosquito 45
Local Search starts	-105.033	74.9667	144.967	234.967
Local Search stops	-85.0333	104.967	154.967	244.967
Engorge starts
Engorge stops
Global Search starts	-135.033	24.9667	104.967	154.967	244.967
Global Search stops	-105.033	74.9667	144.967	234.967	274.967
Rest starts	-315.033	-85.0333	-35.0333	274.967
Rest stops	-275.033	-75.0333	24.9667	564.967
mosquito 46
Local Search starts	-107.367	92.6333	132.633	222.633	302.633
Local Search stops	-87.3667	102.633	142.633	242.633	352.633
Engorge starts
Engorge stops
Global Search starts	-117.367	32.6333	102.633	142.633	242.633
Global Search stops	-107.367	92.6333	132.633	222.633	302.633
Rest starts	352.633
Rest stops	362.633
mosquito 47
Local Search starts	-109.2	-9.2	10.8	110.8	160.8	220.8	530.8
Local Search stops	-99.2	0.8	80.8	130.8	190.8	270.8	540.8
Engorge starts
Engorge stops
Global Search starts	-139.2	80.8	130.8	190.8	270.8	410.8	540.8	590.8
Global Search stops	-109.2	110.8	160.8	220.8	380.8	530.8	570.8	600.8
Rest starts	0.8
Rest stops	10.8
mosquito 48
Local Search starts	-113.167	46.8333	226.833	276.833	506.833	556.833
Local Search stops	-93.1667	66.8333	236.833	286.833	516.833	566.833
Engorge starts
Engorge stops
Global Search starts	-143.167	-93.1667	66.8333	236.833	286.833	446.833	516.833	566.833
Global Search stops	-113.167	46.8333	226.833	276.833	436.833	506.833	556.833	596.833
Rest starts	-583.167
Rest stops	-493.167
mosquito 49
Local Search starts	-230.8	49.2	89.2	349.2
Local Search stops	-210.8	59.2	129.2	469.2
Engorge starts	59.2	579.2
Engorge stops	89.2	599.2
Global Search starts
Global Search stops
Rest starts	-340.8	-40.8	-10.8	39.2	129.2	329.2
Rest stops	-230.8	-30.8	19.2	49.2	139.2	349.2
mosquito 50
Local Search starts	-459.167	-439.167	40.8333	250.833	410.833	570.833
Local Search stops	-449.167	-429.167	190.833	280.833	500.833	590.833
Engorge starts	230.833
Engorge stops	250.833
Global Search starts	-139.167	20.8333	190.833	520.833
Global Search stops	-119.167	40.8333	210.833	540.833
Rest starts	-599.167	-449.167	-429.167	400.833
Rest stops	-459.167	-439.167	-139.167	410.833
mosquito 51
Local Search starts	-473.167	-93.1667	196.833
Local Search stops	-463.167	-83.1667	226.833
Engorge starts
Engorge stops
Global Search starts	-143.167	-13.1667	6.83333	226.833	326.833
Global Search stops	-113.167	-3.16667	196.833	266.833	356.833
Rest starts	-603.167	-463.167	-343.167	-83.1667	286.833
Rest stops	-473.167	-383.167	-143.167	-13.1667	326.833
mosquito 52
Local Search starts	-12.7333	37.2667
Local Search stops	7.26667	47.2667
Engorge starts
Engorge stops
Global Search starts	7.26667	47.2667
Global Search stops	37.2667	147.267
Rest starts	-602.733
Rest stops	-422.733
mosquito 53
Local Search starts	-27.3333	12.6667	82.6667	192.667	232.667
Local Search stops	-17.3333	52.6667	162.667	202.667	262.667
Engorge starts
Engorge stops
Global Search starts	-77.3333	-17.3333	52.6667	162.667	202.667	572.667
Global Search stops	-27.3333	12.6667	82.6667	192.667	232.667	602.667
Rest starts	472.667
Rest stops	492.667
mosquito 54
Local Search starts	-37.3667	22.6333	92.6333	292.633	442.633	582.633
Local Search stops	-27.3667	42.6333	112.633	302.633	462.633	602.633
Engorge starts	-167.367
Engorge stops	-157.367
Global Search starts	-147.367	-77.3667	-27.3667	42.6333	112.633	302.633	462.633	542.633
Global Search stops	-97.3667	-37.3667	-7.36667	82.6333	292.633	442.633	522.633	582.633
Rest starts	-597.367
Rest stops	-417.367
mosquito 55
Local Search starts	-69.2	80.8
Local Search stops	-59.2	100.8
Engorge starts
Engorge stops
Global Search starts	-129.2	-59.2	30.8	100.8	540.8
Global Search stops	-69.2	10.8	80.8	290.8	600.8
Rest starts	-359.2	10.8	500.8
Rest stops	-339.2	30.8	520.8
mosquito 56
Local Search starts	-77.3333	2.66667	212.667	252.667	282.667
Local Search stops	-67.3333	22.6667	222.667	272.667	292.667
Engorge starts
Engorge stops
Global Search starts	-127.333	-17.3333	22.6667	72.6667	172.667	222.667	492.667
Global Search stops	-77.3333	2.66667	62.6667	152.667	212.667	252.667	522.667
Rest starts	272.667
Rest stops	282.667
mosquito 57
Local Search starts	-77.3667	2.63333	112.633	172.633
Local Search stops	-67.3667	32.6333	122.633	202.633
Engorge starts	582.633
Engorge stops	602.633
Global Search starts	-137.367	-67.3667	-27.3667	32.6333	142.633	202.633	552.633
Global Search stops	-77.3667	-37.3667	2.63333	112.633	172.633	222.633	582.633
Rest starts	-267.367
Rest stops	-137.367
mosquito 58
Local Search starts	-82.7333	7.26667	57.2667	107.267
Local Search stops	-72.7333	27.2667	97.2667	137.267
Engorge starts
Engorge stops
Global Search starts	-142.733	-72.7333	27.2667	137.267
Global Search stops	-112.733	-42.7333	57.2667	147.267
Rest starts
Rest stops
mosquito 59
Local Search starts	-99.1667
Local Search stops	-89.1667
Engorge starts
Engorge stops
Global Search starts	-129.167	-89.1667
Global Search stops	-99.1667	360.833
Rest starts	-239.167	370.833
Rest stops	-129.167	510.833
mosquito 60
Local Search starts	-99.2	190.8	330.8	390.8	470.8	510.8	550.8
Local Search stops	-89.2	220.8	360.8	400.8	480.8	530.8	600.8
Engorge starts
Engorge stops
Global Search starts	-139.2	220.8	360.8	400.8	480.8
Global Search stops	-109.2	330.8	390.8	470.8	510.8
Rest starts	-229.2	-189.2	20.8
Rest stops	-199.2	-179.2	40.8
mosquito 61
Local Search starts	-105.033	4.96667	64.9667	114.967	334.967	494.967
Local Search stops	-95.0333	34.9667	84.9667	124.967	364.967	524.967
Engorge starts
Engorge stops
Global Search starts	-135.033	-15.0333	44.9667	84.9667	404.967	474.967	544.967
Global Search stops	-105.033	4.96667	64.9667	114.967	424.967	494.967	574.967
Rest starts	434.967
Rest stops	454.967
mosquito 62
Local Search starts	-107.333	32.6667	142.667
Local Search stops	-97.3333	82.6667	172.667
Engorge starts
Engorge stops
Global Search starts	12.6667	82.6667	172.667
Global Search stops	32.6667	142.667	182.667
Rest starts
Rest stops
mosquito 63
Local Search starts	-107.367	22.6333
Local Search stops	-97.3667	42.6333
Engorge starts
Engorge stops
Global Search starts	-137.367
Global Search stops	-107.367
Rest starts	-97.3667	12.6333	552.633
Rest stops	-67.3667	22.6333	592.633
mosquito 64
Local Search starts	-109.167	0.833333	240.833
Local Search stops	-99.1667	100.833	260.833
Engorge starts
Engorge stops
Global Search starts	-139.167	120.833	260.833
Global Search stops	-109.167	240.833	300.833
Rest starts	-99.1667
Rest stops	-79.1667
mosquito 65
Local Search starts	-112.733	207.267
Local Search stops	-102.733	227.267
Engorge starts
Engorge stops
Global Search starts	-132.733	-2.73333	227.267
Global Search stops	-112.733	207.267	317.267
Rest starts	-52.7333
Rest stops	-2.73333
mosquito 66
Local Search starts	-113.167	436.833	506.833	586.833
Local Search stops	-103.167	476.833	516.833	596.833
Engorge starts	306.833
Engorge stops	316.833
Global Search starts	-143.167	-103.167	-3.16667	476.833	516.833
Global Search stops	-113.167	-73.1667	86.8333	506.833	536.833
Rest starts	-433.167
Rest stops	-423.167
mosquito 67
Local Search starts	-364.167	25.8333	235.833	265.833
Local Search stops	-354.167	45.8333	255.833	285.833
Engorge starts
Engorge stops
Global Search starts	-144.167	-24.1667	285.833	355.833
Global Search stops	-124.167	25.8333	315.833	595.833
Rest starts	-604.167	-354.167	255.833	315.833
Rest stops	-404.167	-144.167	265.833	355.833
mosquito 68
Local Search starts	17.0333	87.0333	147.033	397.033	497.033	547.033
Local Search stops	47.0333	117.033	217.033	427.033	507.033	557.033
Engorge starts
Engorge stops
Global Search starts	-132.967	77.0333	117.033	217.033	347.033	427.033	507.033	557.033
Global Search stops	-102.967	87.0333	147.033	307.033	387.033	497.033	547.033	597.033
Rest starts	-602.967	-62.9667	47.0333	387.033
Rest stops	-502.967	17.0333	57.0333	397.033
mosquito 69
Local Search starts	247.033	307.033	347.033	477.033
Local Search stops	277.033	317.033	357.033	497.033
Engorge starts
Engorge stops
Global Search starts	277.033	317.033	357.033	537.033
Global Search stops	307.033	347.033	477.033	557.033
Rest starts
Rest stops
mosquito 70
Local Search starts	27.5	137.5	277.5	487.5
Local Search stops	107.5	197.5	367.5	497.5
Engorge starts	-232.5
Engorge stops	-212.5
Global Search starts	107.5	197.5	367.5	457.5	477.5
Global Search stops	137.5	277.5	387.5	467.5	487.5
Rest starts	17.5
Rest stops	27.5
mosquito 71
Local Search starts	135.833	315.833	355.833	515.833	585.833
Local Search stops	145.833	325.833	365.833	535.833	595.833
Engorge starts	-114.167
Engorge stops	-104.167
Global Search starts	-134.167	105.833	145.833	255.833	325.833	365.833	535.833
Global Search stops	-114.167	135.833	185.833	305.833	355.833	485.833	585.833
Rest starts	5.83333	45.8333	205.833
Rest stops	35.8333	95.8333	255.833
mosquito 72
Local Search starts	4.96667	134.967	584.967
Local Search stops	24.9667	144.967	594.967
Engorge starts	-385.033	-285.033	-165.033	544.967
Engorge stops	-355.033	-245.033	-135.033	584.967
Global Search starts	-135.033	24.9667	144.967	594.967
Global Search stops	-35.0333	134.967	164.967	604.967
Rest starts
Rest stops
mosquito 73
Local Search starts
Local Search stops
Engorge starts
Engorge stops
Global Search starts
Global Search stops
Rest starts	489.2	539.2
Rest stops	529.2	549.2
mosquito 74
Local Search starts	50.8333	210.833	380.833	530.833	560.833
Local Search stops	170.833	220.833	390.833	550.833	590.833
Engorge starts
Engorge stops
Global Search starts	-129.167	170.833	220.833
Global Search stops	-109.167	200.833	260.833
Rest starts	-109.167	10.8333	260.833	320.833	590.833
Rest stops	-89.1667	50.8333	270.833	330.833	600.833
mosquito 75
Local Search starts	240.833
Local Search stops	260.833
Engorge starts	340.833	440.833	510.833
Engorge stops	370.833	490.833	560.833
Global Search starts	-139.167	20.8333	260.833
Global Search stops	-109.167	240.833	290.833
Rest starts	-599.167	330.833	370.833
Rest stops	-139.167	340.833	380.833
mosquito 76
Local Search starts	17.0333
Local Search stops	37.0333
Engorge starts	-602.967	-512.967	-462.967	-382.967	-362.967	-312.967	-232.967	-212.967	-172.967
Engorge stops	-592.967	-482.967	-422.967	-372.967	-352.967	-282.967	-222.967	-202.967	-142.967
Global Search starts	-22.9667	87.0333	587.033
Global Search stops	7.03333	167.033	597.033
Rest starts	577.033
Rest stops	587.033
mosquito 77
Local Search starts	27.0333	207.033	377.033	487.033	527.033
Local Search stops	57.0333	217.033	387.033	497.033	547.033
Engorge starts	217.033
Engorge stops	227.033
Global Search starts	-2.96667	57.0333	227.033	407.033	497.033	547.033
Global Search stops	27.0333	167.033	377.033	417.033	517.033	597.033
Rest starts	-602.967	387.033
Rest stops	-512.967	407.033
mosquito 78
Local Search starts
Local Search stops
Engorge starts
Engorge stops
Global Search starts
Global Search stops
Rest starts
Rest stops
mosquito 79
Local Search starts
Local Search stops
Engorge starts
Engorge stops
Global Search starts
Global Search stops
Rest starts	459.2
Rest stops	559.2
mosquito 80
Local Search starts	555.833
Local Search stops	595.833
Engorge starts	535.833
Engorge stops	555.833
Global Search starts	-134.167	-44.1667
Global Search stops	-104.167	-4.16667
Rest starts	-524.167	-234.167
Rest stops	-484.167	-134.167
mosquito 81
Local Search starts	410.8
Local Search stops	420.8
Engorge starts
Engorge stops
Global Search starts	-129.2	420.8	590.8
Global Search stops	400.8	540.8	600.8
Rest starts
Rest stops
mosquito 82
Local Search starts	70.8333	170.833	260.833	310.833	400.833	440.833	510.833	580.833
Local Search stops	150.833	210.833	280.833	370.833	410.833	460.833	550.833	600.833
Engorge starts	-599.167	-99.1667
Engorge stops	-569.167	-59.1667
Global Search starts	-139.167	210.833	280.833	370.833	410.833	460.833	550.833
Global Search stops	-109.167	260.833	310.833	400.833	440.833	500.833	580.833
Rest starts	10.8333	160.833
Rest stops	40.8333	170.833
mosquito 83
Local Search starts	0.5	40.5
Local Search stops	20.5	110.5
Engorge starts
Engorge stops
Global Search starts	-139.5	-19.5
Global Search stops	-109.5	-9.5
Rest starts
Rest stops
mosquito 84
Local Search starts	9.2	79.2	139.2	399.2	459.2	509.2
Local Search stops	19.2	109.2	149.2	429.2	469.2	539.2
Engorge starts
Engorge stops
Global Search starts	-140.8	49.2	109.2	149.2	369.2	429.2	469.2
Global Search stops	-100.8	79.2	139.2	199.2	399.2	459.2	509.2
Rest starts	-590.8	-490.8	-420.8	-230.8	19.2
Rest stops	-580.8	-430.8	-340.8	-180.8	29.2
mosquito 85
Local Search starts	197.267
Local Search stops	207.267
Engorge starts
Engorge stops
Global Search starts
Global Search stops
Rest starts	-602.733	-402.733	97.2667	207.267
Rest stops	-542.733	-352.733	197.267	217.267
mosquito 86
Local Search starts	17.2667	217.267	257.267	347.267	407.267	487.267
Local Search stops	27.2667	227.267	297.267	377.267	417.267	497.267
Engorge starts
Engorge stops
Global Search starts	-22.7333	27.2667	227.267	297.267	377.267	417.267	497.267
Global Search stops	17.2667	217.267	257.267	347.267	407.267	447.267	517.267
Rest starts	-302.733
Rest stops	-112.733
mosquito 87
Local Search starts	5.83333	175.833	245.833	345.833	535.833
Local Search stops	65.8333	195.833	275.833	425.833	565.833
Engorge starts	-284.167	-264.167
Engorge stops	-274.167	-144.167
Global Search starts	-144.167	145.833	195.833	275.833
Global Search stops	-104.167	175.833	215.833	305.833
Rest starts	-604.167	-584.167	-564.167	-514.167	-104.167	435.833
Rest stops	-594.167	-574.167	-554.167	-454.167	5.83333	465.833
mosquito 88
Local Search starts	0.5	60.5	540.5
Local Search stops	40.5	500.5	570.5
Engorge starts	40.5
Engorge stops	60.5
Global Search starts	-79.5	-29.5	500.5	570.5
Global Search stops	-59.5	0.5	540.5	600.5
Rest starts	-599.5	-209.5
Rest stops	-259.5	-179.5
mosquito 89
Local Search starts	32.6333	232.633	312.633	392.633	472.633	562.633
Local Search stops	42.6333	282.633	332.633	412.633	492.633	572.633
Engorge starts
Engorge stops
Global Search starts	-577.367	-147.367	-37.3667	42.6333	282.633	372.633	452.633	532.633
Global Search stops	-567.367	-87.3667	-17.3667	182.633	312.633	392.633	472.633	562.633
Rest starts	-597.367	-77.3667	-17.3667	182.633	412.633
Rest stops	-577.367	-57.3667	2.63333	212.633	422.633
mosquito 90
Local Search starts	307.267	377.267	437.267	537.267	577.267
Local Search stops	347.267	407.267	477.267	567.267	597.267
Engorge starts
Engorge stops
Global Search starts
Global Search stops
Rest starts	-602.733
Rest stops	-132.733
mosquito 91
Local Search starts	287.5	417.5
Local Search stops	307.5	437.5
Engorge starts
Engorge stops
Global Search starts	-142.5	437.5	477.5	577.5
Global Search stops	-92.5	467.5	507.5	597.5
Rest starts	-92.5	317.5	467.5
Rest stops	227.5	327.5	477.5
mosquito 92
Local Search starts	0.833333	280.833
Local Search stops	60.8333	290.833
Engorge starts
Engorge stops
Global Search starts	60.8333	130.833	290.833
Global Search stops	90.8333	210.833	310.833
Rest starts	-599.167	240.833	560.833
Rest stops	-589.167	280.833	580.833
mosquito 93
Local Search starts	10.5	50.5	210.5	260.5	390.5	560.5
Local Search stops	20.5	90.5	220.5	340.5	450.5	580.5
Engorge starts
Engorge stops
Global Search starts	-119.5	20.5	90.5	220.5	340.5	450.5	510.5	580.5
Global Search stops	-89.5	50.5	210.5	260.5	390.5	480.5	540.5	590.5
Rest starts	-529.5	-49.5
Rest stops	-299.5	10.5
mosquito 94
Local Search starts	212.633
Local Search stops	222.633
Engorge starts
Engorge stops
Global Search starts	-127.367	222.633	542.633
Global Search stops	152.633	252.633	602.633
Rest starts	162.633	182.633
Rest stops	172.633	192.633
mosquito 95
Local Search starts	157.033
Local Search stops	167.033
Engorge starts
Engorge stops
Global Search starts	27.0333	167.033
Global Search stops	157.033	297.033
Rest starts	-282.967	7.03333
Rest stops	-122.967	27.0333
mosquito 96
Local Search starts	42.6667	92.6667	172.667	212.667
Local Search stops	62.6667	162.667	182.667	332.667
Engorge starts	162.667
Engorge stops	172.667
Global Search starts	-597.333	-37.3333	32.6667	62.6667	182.667
Global Search stops	-587.333	-7.33333	42.6667	92.6667	212.667
Rest starts	-577.333	-557.333	-187.333	402.667
Rest stops	-567.333	-537.333	-177.333	442.667
mosquito 97
Local Search starts	207.033	257.033	347.033	407.033
Local Search stops	237.033	277.033	367.033	467.033
Engorge starts
Engorge stops
Global Search starts	317.033	337.033	367.033	497.033
Global Search stops	327.033	347.033	407.033	527.033
Rest starts	-92.9667	247.033	297.033
Rest stops	-2.96667	257.033	317.033
mosquito 98
Local Search starts	69.2	149.2	229.2
Local Search stops	89.2	199.2	249.2
Engorge starts	439.2	469.2
Engorge stops	459.2	489.2
Global Search starts	89.2	199.2	249.2
Global Search stops	149.2	229.2	279.2
Rest starts	279.2	459.2
Rest stops	349.2	469.2
mosquito 99
Local Search starts
Local Search stops
Engorge starts
Engorge stops
Global Search starts	10.5
Global Search stops	600.5
Rest starts
Rest stops
mosquito 100
Local Search starts
Local Search stops
Engorge starts
Engorge stops
Global Search starts	-99.5
Global Search stops	-79.5
Rest starts	-109.5
Rest stops	-99.5
mosquito 101
Local Search starts
Local Search stops
Engorge starts
Engorge stops
Global Search starts
Global Search stops
Rest starts	-597.367
Rest stops	-557.367
mosquito 102
Local Search starts
Local Search stops
Engorge starts
Engorge stops
Global Search starts
Global Search stops
Rest starts	-595.033	-525.033	-375.033	-355.033	-315.033
Rest stops	-535.033	-405.033	-365.033	-345.033	-305.033
mosquito 103
Local Search starts	564.967
Local Search stops	574.967
Engorge starts
Engorge stops
Global Search starts	14.9667	44.9667	544.967	574.967
Global Search stops	24.9667	94.9667	564.967	604.967
Rest starts
Rest stops
mosquito 104
Local Search starts	102.633	222.633	282.633
Local Search stops	122.633	232.633	332.633
Engorge starts
Engorge stops
Global Search starts	-137.367	122.633	182.633	232.633	332.633
Global Search stops	-107.367	142.633	222.633	282.633	362.633
Rest starts	-177.367	12.6333	362.633
Rest stops	-137.367	52.6333	382.633
mosquito 105
Local Search starts	39.2
Local Search stops	69.2
Engorge starts
Engorge stops
Global Search starts	-140.8
Global Search stops	-110.8
Rest starts	-70.8
Rest stops	39.2
mosquito 106
Local Search starts	67.0333	107.033	217.033	307.033	397.033	437.033	467.033
Local Search stops	77.0333	127.033	227.033	337.033	407.033	457.033	477.033
Engorge starts	-562.967
Engorge stops	-552.967
Global Search starts	57.0333	227.033	407.033	477.033
Global Search stops	67.0333	257.033	437.033	497.033
Rest starts	-602.967	-542.967	-362.967	77.0333
Rest stops	-562.967	-522.967	-232.967	107.033
mosquito 107
Local Search starts	109.2	419.2	539.2	589.2
Local Search stops	119.2	459.2	559.2	599.2
Engorge starts
Engorge stops
Global Search starts	-130.8	39.2	219.2	459.2	559.2
Global Search stops	-100.8	109.2	289.2	489.2	589.2
Rest starts	-40.8	189.2	399.2
Rest stops	-10.8	199.2	409.2
mosquito 108
Local Search starts	507.033	547.033	587.033
Local Search stops	517.033	557.033	597.033
Engorge starts
Engorge stops
Global Search starts	487.033	557.033
Global Search stops	507.033	587.033
Rest starts	-22.9667	117.033	237.033	267.033
Rest stops	27.0333	177.033	247.033	327.033
Fed Mosquitoes
mosquito 1
Local Search starts	-479.5	-119.5	100.5	460.5
Local Search stops	-469.5	10.5	120.5	490.5
Engorge starts	120.5
Engorge stops	230.5
Global Search starts	20.5
Global Search stops	100.5
Rest starts	-559.5	10.5
Rest stops	-529.5	20.5
mosquito 2
Local Search starts	-103.167
Local Search stops	26.8333
Engorge starts	26.8333	136.833
Engorge stops	86.8333	176.833
Global Search starts	-123.167
Global Search stops	-103.167
Rest starts	-603.167	-403.167	256.833	476.833
Rest stops	-473.167	-253.167	336.833	536.833
mosquito 3
Local Search starts	-107.333	22.6667	172.667
Local Search stops	-7.33333	42.6667	192.667
Engorge starts	42.6667
Engorge stops	172.667
Global Search starts	-127.333	-7.33333
Global Search stops	-107.333	22.6667
Rest starts
Rest stops
mosquito 4
Local Search starts	-104.167	45.8333
Local Search stops	-14.1667	85.8333
Engorge starts	85.8333	585.833
Engorge stops	295.833	595.833
Global Search starts	-124.167
Global Search stops	-104.167
Rest starts	-4.16667	295.833	495.833
Rest stops	35.8333	305.833	505.833
mosquito 5
Local Search starts	-107.367	-57.3667
Local Search stops	-77.3667	22.6333
Engorge starts	22.6333
Engorge stops	162.633
Global Search starts	-137.367
Global Search stops	-107.367
Rest starts	-597.367	-507.367	-397.367	-157.367	162.633	192.633
Rest stops	-527.367	-477.367	-357.367	-137.367	182.633	222.633
mosquito 6
Local Search starts	-109.167	-39.1667	50.8333
Local Search stops	-49.1667	-9.16667	60.8333
Engorge starts	60.8333
Engorge stops	600.833
Global Search starts	-139.167	20.8333
Global Search stops	-109.167	50.8333
Rest starts	10.8333
Rest stops	20.8333
mosquito 7
Local Search starts	-112.733	7.26667
Local Search stops	-22.7333	37.2667
Engorge starts	37.2667
Engorge stops	367.267
Global Search starts	-142.733	-22.7333
Global Search stops	-112.733	7.26667
Rest starts
Rest stops
mosquito 8
Local Search starts	-112.733	-92.7333	537.267
Local Search stops	-102.733	-12.7333	597.267
Engorge starts
Engorge stops
Global Search starts
Global Search stops
Rest starts	-362.733	-102.733
Rest stops	-332.733	-92.7333
mosquito 9
Local Search starts	-113.167	6.83333
Local Search stops	-23.1667	16.8333
Engorge starts	16.8333
Engorge stops	236.833
Global Search starts	-133.167	-23.1667
Global Search stops	-113.167	6.83333
Rest starts
Rest stops
mosquito 10
Local Search starts	-113.167	-53.1667	116.833	186.833	236.833	356.833
Local Search stops	-73.1667	26.8333	176.833	216.833	316.833	396.833
Engorge starts	26.8333	176.833	216.833	316.833	396.833
Engorge stops	116.833	186.833	236.833	356.833	416.833
Global Search starts	-143.167	416.833	496.833
Global Search stops	-113.167	446.833	516.833
Rest starts	486.833
Rest stops	496.833
mosquito 11
Local Search starts	-123.167	-23.1667	96.8333	176.833
Local Search stops	-53.1667	26.8333	156.833	196.833
Engorge starts	26.8333	156.833	196.833
Engorge stops	96.8333	176.833	336.833
Global Search starts	-53.1667
Global Search stops	-23.1667
Rest starts	436.833
Rest stops	526.833
mosquito 12
Local Search starts	-104.167	-34.1667	25.8333	95.8333	195.833	245.833
Local Search stops	-54.1667	-4.16667	45.8333	105.833	225.833	275.833
Engorge starts	105.833
Engorge stops	195.833
Global Search starts	-124.167	-4.16667	45.8333
Global Search stops	-104.167	25.8333	95.8333
Rest starts
Rest stops
mosquito 13
Local Search starts	-104.167	-64.1667	45.8333	115.833
Local Search stops	-84.1667	5.83333	75.8333	145.833
Engorge starts	5.83333	75.8333	145.833
Engorge stops	45.8333	115.833	265.833
Global Search starts	-134.167
Global Search stops	-104.167
Rest starts
Rest stops
mosquito 14
Local Search starts	-109.5	-19.5	30.5	490.5	510.5
Local Search stops	-49.5	0.5	40.5	500.5	520.5
Engorge starts	40.5
Engorge stops	330.5
Global Search starts	-49.5	550.5
Global Search stops	-19.5	560.5
Rest starts	10.5	330.5	500.5
Rest stops	30.5	490.5	510.5
mosquito 15
Local Search starts	-129.167	20.8333
Local Search stops	-49.1667	40.8333
Engorge starts	40.8333
Engorge stops	410.833
Global Search starts	-49.1667	10.8333
Global Search stops	-19.1667	20.8333
Rest starts
Rest stops
mosquito 16
Local Search starts	-562.5	-112.5	-52.5	177.5	227.5	417.5
Local Search stops	-552.5	-92.5	27.5	187.5	237.5	447.5
Engorge starts	27.5	207.5	237.5	447.5
Engorge stops	177.5	227.5	417.5	557.5
Global Search starts	-142.5	-92.5
Global Search stops	-112.5	-52.5
Rest starts	-602.5	-552.5	187.5	557.5
Rest stops	-562.5	-482.5	207.5	567.5
mosquito 17
Local Search starts	-77.3333	202.667	332.667	452.667
Local Search stops	-7.33333	222.667	352.667	462.667
Engorge starts	32.6667
Engorge stops	202.667
Global Search starts	-127.333	-7.33333	222.667	272.667	362.667
Global Search stops	-77.3333	32.6667	262.667	332.667	372.667
Rest starts	-577.333	462.667
Rest stops	-417.333	482.667
mosquito 18
Local Search starts	-592.5	-112.5	-32.5	47.5	137.5	297.5
Local Search stops	-582.5	-82.5	17.5	57.5	217.5	307.5
Engorge starts	217.5
Engorge stops	297.5
Global Search starts	-142.5	-82.5	17.5	117.5
Global Search stops	-112.5	-32.5	47.5	137.5
Rest starts	-602.5	-582.5	57.5
Rest stops	-592.5	-502.5	67.5
mosquito 19
Local Search starts	-599.2	-519.2	-99.2	-39.2
Local Search stops	-579.2	-509.2	-69.2	-29.2
Engorge starts	20.8
Engorge stops	110.8
Global Search starts	-549.2	-299.2	-139.2	-69.2	-29.2
Global Search stops	-519.2	-289.2	-99.2	-39.2	20.8
Rest starts	-339.2	110.8	520.8
Rest stops	-299.2	210.8	600.8
mosquito 20
Local Search starts	-105.033	-35.0333
Local Search stops	-65.0333	-15.0333
Engorge starts	14.9667
Engorge stops	604.967
Global Search starts	-125.033	-65.0333	-15.0333
Global Search stops	-105.033	-35.0333	14.9667
Rest starts
Rest stops
mosquito 21
Local Search starts	-142.733	-82.7333	-52.7333	-2.73333
Local Search stops	-122.733	-62.7333	-32.7333	7.26667
Engorge starts	-322.733	7.26667
Engorge stops	-142.733	277.267
Global Search starts	-32.7333
Global Search stops	-2.73333
Rest starts	-602.733	517.267	557.267
Rest stops	-322.733	527.267	597.267
mosquito 22
Local Search starts	-75.0333	-55.0333	4.96667	264.967
Local Search stops	-65.0333	-15.0333	34.9667	284.967
Engorge starts	34.9667
Engorge stops	134.967
Global Search starts	134.967	284.967
Global Search stops	154.967	314.967
Rest starts	-595.033	-15.0333	314.967	464.967
Rest stops	-515.033	-5.03333	324.967	484.967
mosquito 23
Local Search starts	-87.3333	12.6667	232.667	312.667	362.667	392.667
Local Search stops	-37.3333	32.6667	262.667	352.667	382.667	502.667
Engorge starts	102.667	262.667	352.667	382.667	502.667
Engorge stops	162.667	312.667	362.667	392.667	602.667
Global Search starts	-137.333	-17.3333	32.6667	162.667
Global Search stops	-107.333	2.66667	82.6667	192.667
Rest starts
Rest stops
mosquito 24
Local Search starts	-110.8	-80.8	9.2
Local Search stops	-100.8	-40.8	59.2
Engorge starts
Engorge stops
Global Search starts	-120.8	-40.8
Global Search stops	-110.8	-10.8
Rest starts	-100.8	-10.8
Rest stops	-80.8	-0.8
mosquito 25
Local Search starts	-37.3333	72.6667	452.667	592.667
Local Search stops	42.6667	112.667	502.667	602.667
Engorge starts	42.6667	142.667	282.667
Engorge stops	72.6667	242.667	452.667
Global Search starts	-137.333	112.667	242.667	562.667
Global Search stops	-37.3333	142.667	282.667	582.667
Rest starts	-557.333	-517.333	552.667
Rest stops	-527.333	-237.333	562.667
mosquito 26
Local Search starts	-72.5	-2.5	167.5	257.5	397.5	507.5	557.5
Local Search stops	-32.5	17.5	197.5	287.5	437.5	527.5	587.5
Engorge starts	17.5
Engorge stops	167.5
Global Search starts	-92.5	-32.5	287.5	347.5	437.5	477.5	527.5
Global Search stops	-72.5	-2.5	307.5	387.5	467.5	507.5	557.5
Rest starts
Rest stops
mosquito 27
Local Search starts	-112.967	-32.9667	17.0333	77.0333	147.033	217.033	317.033
Local Search stops	-92.9667	-12.9667	27.0333	137.033	177.033	247.033	337.033
Engorge starts	27.0333	137.033	177.033	247.033
Engorge stops	77.0333	147.033	217.033	317.033
Global Search starts	-132.967	-92.9667	-12.9667
Global Search stops	-112.967	-32.9667	17.0333
Rest starts	347.033
Rest stops	397.033
mosquito 28
Local Search starts	-79.2	0.8	550.8
Local Search stops	-49.2	60.8	560.8
Engorge starts	60.8	560.8
Engorge stops	160.8	580.8
Global Search starts	-119.2	-49.2	580.8
Global Search stops	-79.2	0.8	600.8
Rest starts	290.8	380.8	450.8
Rest stops	320.8	430.8	550.8
mosquito 29
Local Search starts	-87.3333	-37.3333	12.6667	242.667	322.667	372.667
Local Search stops	-67.3333	-27.3333	72.6667	272.667	342.667	412.667
Engorge starts	72.6667	342.667
Engorge stops	102.667	372.667
Global Search starts	-127.333	-67.3333	-27.3333	122.667	312.667
Global Search stops	-107.333	-37.3333	2.66667	132.667	322.667
Rest starts	102.667	202.667	442.667
Rest stops	122.667	242.667	472.667
mosquito 30
Local Search starts	-102.5	27.5
Local Search stops	-72.5	47.5
Engorge starts
Engorge stops
Global Search starts	-142.5	-2.5	47.5
Global Search stops	-112.5	27.5	67.5
Rest starts
Rest stops
mosquito 31
Local Search starts	-104.167	15.8333	95.8333	565.833
Local Search stops	-74.1667	35.8333	105.833	595.833
Engorge starts	535.833
Engorge stops	565.833
Global Search starts	-144.167	35.8333
Global Search stops	-104.167	95.8333
Rest starts
Rest stops
mosquito 32
Local Search starts	-52.7333	7.26667	127.267	507.267
Local Search stops	-32.7333	17.2667	157.267	527.267
Engorge starts	17.2667	487.267
Engorge stops	127.267	507.267
Global Search starts	-142.733	-72.7333	-22.7333
Global Search stops	-112.733	-52.7333	7.26667
Rest starts	277.267
Rest stops	297.267
mosquito 33
Local Search starts	-67.3333	12.6667	132.667
Local Search stops	-47.3333	102.667	142.667
Engorge starts	142.667
Engorge stops	262.667
Global Search starts	-137.333	-47.3333	102.667
Global Search stops	-67.3333	12.6667	132.667
Rest starts	262.667
Rest stops	272.667
mosquito 34
Local Search starts	-99.5	10.5	30.5	140.5	250.5
Local Search stops	-79.5	20.5	60.5	170.5	260.5
Engorge starts	20.5	60.5
Engorge stops	30.5	140.5
Global Search starts	-109.5	-79.5	230.5
Global Search stops	-99.5	10.5	250.5
Rest starts	310.5
Rest stops	320.5
mosquito 35
Local Search starts	-424.167	-404.167	235.833	275.833	365.833	505.833
Local Search stops	-414.167	-394.167	265.833	315.833	425.833	555.833
Engorge starts	425.833
Engorge stops	435.833
Global Search starts
Global Search stops
Rest starts	-604.167	-394.167	65.8333
Rest stops	-424.167	-284.167	175.833
mosquito 36
Local Search starts	-12.9667	37.0333	77.0333
Local Search stops	17.0333	57.0333	157.033
Engorge starts	17.0333	157.033
Engorge stops	37.0333	257.033
Global Search starts
Global Search stops
Rest starts	-592.967	257.033	287.033
Rest stops	-482.967	277.033	297.033
mosquito 37
Local Search starts	-52.7333
Local Search stops	-42.7333
Engorge starts
Engorge stops
Global Search starts	-132.733
Global Search stops	-52.7333
Rest starts	-582.733	-372.733
Rest stops	-412.733	-192.733
mosquito 38
Local Search starts	-55.0333	14.9667	84.9667	434.967
Local Search stops	-45.0333	44.9667	104.967	444.967
Engorge starts	44.9667	104.967
Engorge stops	54.9667	244.967
Global Search starts	-75.0333	-45.0333	54.9667	274.967
Global Search stops	-55.0333	14.9667	84.9667	284.967
Rest starts	244.967	444.967
Rest stops	274.967	554.967
mosquito 39
Local Search starts	-59.5	10.5
Local Search stops	-49.5	30.5
Engorge starts	30.5
Engorge stops	600.5
Global Search starts	-129.5	-49.5
Global Search stops	-109.5	-9.5
Rest starts
Rest stops
mosquito 40
Local Search starts	-99.5	0.5
Local Search stops	-89.5	110.5
Engorge starts	110.5	240.5	430.5	470.5	500.5
Engorge stops	200.5	250.5	440.5	490.5	570.5
Global Search starts	-139.5
Global Search stops	-99.5
Rest starts	200.5	250.5	310.5	400.5	460.5	490.5	570.5
Rest stops	240.5	280.5	340.5	430.5	470.5	500.5	580.5
mosquito 41
Local Search starts	-104.167	5.83333
Local Search stops	-94.1667	25.8333
Engorge starts	25.8333
Engorge stops	225.833
Global Search starts	-134.167	-94.1667	395.833	415.833
Global Search stops	-104.167	5.83333	405.833	445.833
Rest starts	-604.167	225.833
Rest stops	-134.167	395.833
mosquito 42
Local Search starts	-107.367	12.6333
Local Search stops	-97.3667	22.6333
Engorge starts	22.6333
Engorge stops	192.633
Global Search starts	-147.367
Global Search stops	-107.367
Rest starts	-37.3667	192.633
Rest stops	12.6333	202.633
mosquito 43
Local Search starts	-112.5	187.5	337.5
Local Search stops	-102.5	217.5	367.5
Engorge starts	-102.5
Engorge stops	137.5
Global Search starts	-132.5
Global Search stops	-112.5
Rest starts	137.5
Rest stops	157.5
mosquito 44
Local Search starts	-535.033	4.96667	124.967	194.967	404.967
Local Search stops	-525.033	34.9667	174.967	234.967	434.967
Engorge starts	34.9667	54.9667	174.967
Engorge stops	44.9667	124.967	194.967
Global Search starts	-5.03333
Global Search stops	4.96667
Rest starts	-595.033	44.9667
Rest stops	-535.033	54.9667
mosquito 45
Local Search starts	36.8333	176.833
Local Search stops	146.833	226.833
Engorge starts	-113.167	-13.1667	146.833	226.833
Engorge stops	-103.167	36.8333	176.833	316.833
Global Search starts	-563.167	-523.167	-413.167	-143.167
Global Search stops	-533.167	-453.167	-383.167	-113.167
Rest starts	-273.167
Rest stops	-143.167
mosquito 46
Local Search starts	0.833333	240.833	300.833	340.833
Local Search stops	50.8333	250.833	310.833	360.833
Engorge starts	50.8333	210.833	310.833	360.833	450.833
Engorge stops	130.833	240.833	340.833	430.833	480.833
Global Search starts
Global Search stops
Rest starts	130.833
Rest stops	210.833
mosquito 47
Local Search starts	52.6333
Local Search stops	92.6333
Engorge starts	42.6333	92.6333
Engorge stops	52.6333	212.633
Global Search starts	-137.367	-47.3667
Global Search stops	-67.3667	42.6333
Rest starts	-597.367	-297.367	-197.367	212.633
Rest stops	-567.367	-217.367	-177.367	302.633
mosquito 48
Local Search starts	7.5	177.5	417.5	557.5
Local Search stops	147.5	217.5	437.5	587.5
Engorge starts	217.5
Engorge stops	287.5
Global Search starts	147.5	287.5	467.5	497.5
Global Search stops	177.5	327.5	487.5	527.5
Rest starts	-602.5	-72.5	-22.5	387.5	527.5
Rest stops	-372.5	-42.5	7.5	407.5	537.5
mosquito 49
Local Search starts	5.83333	85.8333
Local Search stops	45.8333	105.833
Engorge starts	-604.167	-554.167	-504.167	45.8333
Engorge stops	-584.167	-524.167	-454.167	85.8333
Global Search starts	105.833	125.833
Global Search stops	115.833	135.833
Rest starts
Rest stops
mosquito 50
Local Search starts	22.6333	132.633	152.633
Local Search stops	32.6333	142.633	162.633
Engorge starts	32.6333	142.633
Engorge stops	132.633	152.633
Global Search starts	2.63333
Global Search stops	22.6333
Rest starts
Rest stops
mosquito 51
Local Search starts	27.5
Local Search stops	47.5
Engorge starts	47.5
Engorge stops	547.5
Global Search starts	7.5
Global Search stops	27.5
Rest starts
Rest stops
mosquito 52
Local Search starts	46.8333
Local Search stops	156.833
Engorge starts	156.833
Engorge stops	246.833
Global Search starts
Global Search stops
Rest starts
Rest stops
mosquito 53
Local Search starts	0.833333	50.8333
Local Search stops	30.8333	150.833
Engorge starts	150.833
Engorge stops	280.833
Global Search starts
Global Search stops
Rest starts
Rest stops
mosquito 54
Local Search starts	20.5
Local Search stops	40.5
Engorge starts	40.5
Engorge stops	140.5
Global Search starts	-129.5
Global Search stops	20.5
Rest starts	140.5
Rest stops	150.5
mosquito 55
Local Search starts	42.6667	132.667	172.667
Local Search stops	62.6667	142.667	192.667
Engorge starts	192.667
Engorge stops	292.667
Global Search starts	-137.333	32.6667	62.6667	142.667
Global Search stops	-107.333	42.6667	132.667	172.667
Rest starts	-377.333
Rest stops	-237.333
mosquito 56
Local Search starts	19.2	69.2
Local Search stops	39.2	109.2
Engorge starts	109.2
Engorge stops	259.2
Global Search starts	-130.8	39.2
Global Search stops	-100.8	69.2
Rest starts	259.2	419.2	499.2
Rest stops	269.2	429.2	539.2
mosquito 57
Local Search starts	12.6333	72.6333
Local Search stops	32.6333	112.633
Engorge starts	112.633
Engorge stops	172.633
Global Search starts	-137.367	-47.3667	32.6333	172.633
Global Search stops	-107.367	2.63333	72.6333	192.633
Rest starts
Rest stops
mosquito 58
Local Search starts	29.2	69.2	119.2	429.2	449.2
Local Search stops	59.2	79.2	259.2	439.2	479.2
Engorge starts	439.2	479.2
Engorge stops	449.2	599.2
Global Search starts	-130.8	259.2
Global Search stops	-100.8	309.2
Rest starts	-100.8	79.2	309.2
Rest stops	29.2	119.2	409.2
mosquito 59
Local Search starts	99.2	159.2
Local Search stops	109.2	169.2
Engorge starts	169.2
Engorge stops	559.2
Global Search starts	109.2
Global Search stops	159.2
Rest starts
Rest stops
mosquito 60
Local Search starts	6.83333	166.833
Local Search stops	66.8333	176.833
Engorge starts	66.8333
Engorge stops	136.833
Global Search starts	136.833
Global Search stops	166.833
Rest starts	-43.1667
Rest stops	-23.1667

## Sheet: Figure 4M
Figure 4M
Stimulus: -2 minutes
Local Search	Global Search	engorgement
0.666667	0.333333	0
0	0	1
1.5	0.5	1
0	0	1
1.5	0.5	1
0	0.166667	1
1.66667	0.333333	1
0.166667	0.666667	0
0.333333	1.66667	0
1.5	0.166667	1
0.5	0.666667	0
0.5	0.166667	0
0.166667	0.333333	0
0.5	0.666667	0
0.166667	1.83333	0
0.666667	0.333333	0
0.5	1.33333	0
1	0.333333	0
0.5	1.5	1
0.333333	0.5	0
0.666667	1.33333	0
0.666667	1.33333	1
0	2	0
1	0	0
0.333333	0.166667	0
0.333333	0.5	0
0.166667	0.166667	0
0.666667	1.33333	0
1	0.333333	0
0	0	0
0	0	0
0.5	0.666667	0
0	0	0
0	0	0
0	0	0
0.666667	1.33333	1
0.5	1.33333	0
0	0.333333	0
0.166667	0	1
0	0.333333	0
1	0.666667	0
0	0	0
0.833333	0.333333	0
1	0.5	0
0.333333	0.166667	0
0	0.166667	1
1.33333	0.166667	0
0.166667	0.5	0
0	1.33333	0
1	1	1
0	0	0
1.16667	0.5	0
0.166667	1.16667	1
0	0	0
0	0	0
0.833333	0	1
0.333333	0.5	0
0.5	0.333333	0
0.5	0.166667	1
1	0.166667	0
1.16667	0.166667	0
1.33333	0.5	0
0.666667	0.833333	1
0	0	1
1.16667	0.833333	1
0.166667	0.166667	1
0	0	0
0	0.5	0
1	1	1
0	0	1
0	0.166667	0
0.166667	1.83333	0
0.5	0	0
0	0.166667	0
1	1	0
0	0	0
0.166667	0.166667	0
1.16667	0.5	1
0	0	0
0	0	1
1.5	0.166667	1
0.666667	0	0
0	0.166667	0
0	0	1
0.666667	0.333333	0
0.333333	1	0
0	0	0
0	0.333333	0
0	0	1
0	0.166667	0
0	0.333333	0
0	0.333333	1
1.83333	0.166667	0
0	0	0
0.833333	0.666667	1
0	0.333333	1
0	0	0
0	0	0
0.166667	0	0
0.333333	1.66667	1
0.5	1.16667	1
0.666667	0.666667	0
0.833333	0.5	1
0.666667	1.33333	1
1.66667	0.333333	1
0.166667	1.16667	0
1.16667	0.833333	1
0	0	0
0.166667	1	0
0	0.5	0
0.5	0.166667	0
0	0.166667	1
0.166667	0	0
1	1	0
0.166667	0.666667	0
1.5	0	1
0.666667	0.5	1
0.166667	0.166667	0
0.166667	1.16667	1
1.5	0.5	1
1.33333	0.666667	0
0	0	0
0	0.333333	0
0	0	0
0.833333	0	0
0.333333	0.833333	1
1.16667	0.333333	0
0	0.166667	0
0.5	0.333333	1
1.33333	0.333333	1
1.5	0.333333	1
0	0.333333	0
1.33333	0.333333	1
0.166667	1.83333	1
0	0	1
0	1	0
0.333333	0.333333	0
0	0	1
0	0.333333	0
1.5	0.166667	0
0.166667	0.166667	0
0.5	1.5	0
0.166667	0.833333	1
0	0.833333	0
0	0.333333	0
0.333333	1.5	1
0	2	1
0	0	0
1.16667	0	0
0.166667	0.333333	1
1.33333	0.5	1
0	0.5	0
0	0.333333	0
2	0	1
0.166667	0.166667	0
0	1	1
0.166667	1.66667	0
0	0.166667	0
0	1.66667	1
0.166667	0.166667	1
0.166667	1.33333	0
0	0	1
0.333333	1.66667	0
0.333333	0.166667	0
0	0.833333	0
1.5	0.166667	1
0	0	0
0	2	0

## Sheet: Figure 4N
Figure 4N
Stimulus: -2 minutes						Stimulus: -8 minutes						Stimulus: -14 minutes
groomBB	walk_BB	probeBB	fly2	engorgement		groomBB	walk_BB	probeBB	fly2	engorgement		groomBB	walk_BB	probeBB	fly2	engorgement
0.0561574	0.0249074	0.0155093	0.000925926	0		0.00319444	0.0281944	0.0062963	0.00518519	0		0	0	0	0	0
0.00689815	0.000648148	0	0.000972222	1		0.013287	0.0762037	0.00611111	0.00152778	1		0.0106481	0.113148	0.0133796	0.00597222	0
0.00833333	0.1	0.0735648	0.00101852	1		0.00430556	0.107731	0.0358796	0.00435185	1		0.00203704	0.0179167	0.00189815	0.00287037	0
0.02875	0.00615741	0.00708333	0	1		0.0125926	0.127222	0.072963	0.000694444	1		0.01875	0.0636111	0.0168519	0.00263889	0
0.00546296	0.112083	0.082037	0.00277778	1		0.0113889	0.0886574	0.0251852	0.00162037	0		0.0491204	0.0100926	0.0012037	0	0
0	0	0.0190741	0	1		0.019537	0.0187037	0.00143519	0.000509259	0		0.0230556	0.00953704	0.00527778	0.00212963	0
0.00532407	0.141389	0.0867593	0	1		0.00467593	0.00319444	0	0	0		0	0	0	0	0
0.00523148	0.0545833	0.00796296	0.000601852	0		0.00402778	0.102824	0.0281944	0.00453704	0		0.0037037	0.0777315	0.0087037	0.0184259	0
0.00310185	0.107176	0.0139815	0.0125463	0		0.0139352	0.0916204	0.00611111	0.0117593	0		0.159213	0	0	0	0
0.016713	0.0698148	0.0384722	0	1		0.00587963	0.0597222	0.00615741	0.00300926	1		0.00916667	0.0253704	0.00513889	0	0
0.0147685	0.0518056	0.000648148	0.000833333	0		0.00763889	0.0460648	0.0049537	0.00393519	0		0.0323611	0.00712963	0.000833333	0.0024537	1
0.0423611	0.0321759	0.0148611	0	0		0.0873148	0.00805556	0	0	0		0.00675926	0.0541667	0.00282407	0.0124537	0
0.0450463	0.0120833	0	0	0		0.0250926	0.0410648	0.00523148	0.00106481	0		0.000324074	0.0012037	0	0.00037037	0
0.000462963	0.0489815	0.00981481	0.00037037	0		0.0151389	0.0273148	0	0.00310185	1		0.0202315	0.0934722	0.00773148	0.00125	0
0.0210648	0.0831944	0.00375	0.0128241	0		0.0174537	0.00217593	0.00101852	0	0		0.0473611	0.0118519	0.00324074	0.0012037	0
0.0280093	0.032037	0.00037037	0.000324074	0		0.00546296	0.121389	0.0368056	0.00398148	0		0.000509259	0.0122222	0.00180556	0	0
0.0146296	0.0602315	0.00277778	0.00185185	0		0.038287	0.00717593	0.00101852	0.00310185	0		0	0	0.00703704	0.00208333	0
0.00319444	0.035	0.0328241	0.000416667	0		0.0206944	0.0963426	0.0246296	0.00643519	0		0.0118056	0.0712037	0.0210185	0	0
0.00212963	0.10375	0.0269444	0.00416667	1		0.00935185	0.00643519	0	0.00643519	0		0	0	0	0	0
0.00842593	0.0399537	0.00430556	0.000509259	0		0.0544907	0.0518519	0.00671296	0.00125	0		0.00462963	0.00810185	0.0024537	0	0
0.00699074	0.0733333	0.00740741	0.0049537	0		0.00444444	0.0809722	0.0227778	0.00675926	0		0.00143519	0.115	0.0714352	0.00037037	0
0.00592593	0.146204	0.0678241	0.00356481	1		0.00481481	0.131898	0.0544907	0.00722222	1		0.0128241	0.100509	0.00833333	0.00180556	0
0.00263889	0.11037	0.0134722	0.0147222	0		0.00615741	0.0669907	0.0278704	0.00773148	1		0.0255556	0	0.000231481	0.000185185	0
0.00523148	0.0337963	0.00763889	0	0		0.0300463	0.0122222	0.000416667	0.00291667	0		0.0174074	0.0792593	0.0305093	0.00296296	0
0.00763889	0.0234259	0.00458333	0.00101852	0		0.00282407	0.125787	0.0328241	0.00226852	0		0.00148148	0.0586111	0.005	0.00087963	1
0.0285648	0.014537	0.00115741	0.00333333	0		0.00842593	0.00828704	0.000231481	0	0		0.00314815	0.0722685	0.0326852	0.00125	0
0.02125	0.0180556	0	0.000694444	0		0.00939815	0.0111574	0.00203704	0.00111111	0		0.00722222	0.0414352	0.00375	0.00717593	0
0.00138889	0.138287	0.0393519	0.00273148	0		0.0102315	0.100278	0.0375463	0.0025	0		0.0124074	0.0240741	0	0.00791667	0
0.00680556	0.0288889	0.00689815	0	0		0.0746759	0.0242593	0.00782407	0	0		0.0075463	0.0143981	0.00222222	0	0
0.0812037	0.0129167	0.00324074	0	0		0.0135185	0.0275463	0.0153704	0	1		0.00347222	0.122685	0.079537	0.00166667	0
0	0	0	0	0		0.00305556	0.0151852	0.00175926	0	0		0.005	0.0074537	0.00106481	0.00037037	0
0.00861111	0.0443519	0.00314815	0.00157407	0		0.106389	0.0024537	0	0	0		0.000833333	0	0	0	0
0.00842593	0.000925926	0.000277778	0	0		0.00615741	0.111944	0.0293519	0.000509259	0		0.00828704	0.0163426	0.0192593	0.00375	1
0.0200463	0	0.00222222	0	0		0.0228241	0.000694444	0	0	0		0.00287037	0.0555556	0.01875	0.00476852	1
0	0	0.000231481	0	0		0.00231481	0	0	0	0		0.0134722	0.0906481	0.0584259	0.00087963	0
0.00662037	0.106111	0.0247685	0.00402778	1		0.00351852	0.13912	0.0306944	0.00263889	1		0.00333333	0.102037	0.0518519	0.00185185	1
0.00037037	0.0881481	0.0119444	0.00601852	0		0.00935185	0.0448611	0.0315278	0.00328704	0		0.00263889	0	0.000416667	0	0
0.00231481	0.00967593	0.00310185	0.00199074	0		0.06	0.0106481	0.000509259	0	1		0.000231481	0	0	0	0
0.0208796	0.00282407	0.00560185	0	1		0.0025	0.0261574	0.00268519	0.00212963	0		0.0246759	0.0253241	0.000740741	0	0
0.06625	0.00972222	0.00231481	0.000324074	0		0	0	0	0	0		0.0668981	0.00328704	0.00699074	0	0
0.0108796	0.0916667	0.0217593	0.000277778	0		0.0151852	0	0.000509259	0	0		0	0.0024537	0.00143519	0	0
0.00699074	0.000277778	0	0	0		0.00819444	0.0717593	0.0410185	0.00138889	1		0.00236111	0.000277778	0	0	0
0.0153704	0.0465278	0.0151852	0.000972222	0		0.0109722	0.0821759	0.0246759	0.00240741	0		0.00458333	0	0	0	0
0.0143981	0.0621296	0.00407407	0.0012037	0		0	0	0	0	0		0.0660648	0.0111111	0	0.00111111	1
0.0445833	0.0197685	0.00296296	0.000648148	0		0.00324074	0.00847222	0	0.000787037	1		0.00138889	0	0	0	0
0	0	0.00138889	0.0012037	1		0.0300463	0.0197222	0.00175926	0.000462963	0		0.0174537	0.0219444	0.00509259	0.000833333	1
0.00125	0.0548148	0.034537	0.00319444	0		0.00740741	0.120648	0.0374537	0.00555556	0		0.00356481	0.0615741	0.0437963	0.000787037	1
0.0049537	0.0276389	0.00671296	0.00152778	0		0.00763889	0.13662	0.100926	0.00532407	0		0.0124074	0	0	0	0
0.00671296	0.0618056	0.0236111	0.0062963	0		0.035463	0.00115741	0	0	0		0.0127315	0.0555556	0.0119907	0.00273148	0
0.00199074	0.131898	0.0246296	0.00171296	1		0.0114352	0.115278	0.0481481	0.00138889	0		0.00314815	0	0	0	0
0.000555556	0	0	0	0		0.000648148	0	0	0	0		0.0133796	0	0	0	1
0.0112037	0.0921296	0.0236574	0.00273148	0		0	0	0	0	0		0.021713	0.0238426	0.0174074	0.000740741	1
0.00388889	0.0509722	0.039537	0.00148148	1		0	0	0	0	1		0.0273611	0.0428704	0.0570833	0	1
0	0	0	0	0		0.0151852	0.0225463	0	0	0		0.0025	0.00643519	0.00472222	0.00111111	0
0.0206944	0	0	0	0		0.0681481	0.0126389	0.00287037	0	0		0.0494444	0.0106944	0.00319444	0.00111111	0
0.0248148	0.0402778	0.035787	0	1		0.0405556	0.0593981	0.0264815	0.00111111	0		0.028287	0.00527778	0.00138889	0.00087963	0
0.0291667	0.0258333	0.00481481	0.000555556	0		0	0.00518519	0.00439815	0.000601852	0		0	0	0.00412037	0	0
0.00736111	0.0378241	0.00472222	0.000231481	0		0.000555556	0.0677778	0.0183333	0	1		0.0359259	0.0162037	0.000740741	0.0037037	0
0.00277778	0.0242593	0.00648148	0.00175926	1		0	0	0	0	0		0	0.00592593	0.00412037	0	0
0.0138889	0.0485185	0.0522222	0	0		0	0	0	0	0		0.00685185	0.0766204	0.0143056	0	0
0.0336574	0.0463426	0.00898148	0	0		0.00550926	0	0	0	0		0.00708333	0.0836111	0.014537	0.0107407	0
0.00722222	0.0966667	0.0519444	0.00115741	0		0.00148148	0.00597222	0	0	0		0.0869444	0.00375	0.0151852	0	0
0.0127315	0.100139	0.0507407	0.00125	1		0.00657407	0.108056	0.0170833	0.00509259	0		0.113889	0.00106481	0.00185185	0	1
0.0418981	0	0	0	1		0.00694444	0.0119444	0.15125	0	1		0.00462963	0.0768519	0.0301389	0	0
0.00277778	0.0947685	0.0218981	0.00166667	1		0.0134722	0.0125	0.00189815	0.00236111	0		0.0103704	0	0	0	0
0.0210648	0.00939815	0.15412	0	1		0.00467593	0.0290741	0.0175926	0.00203704	1		0.044537	0.0136111	0.0137037	0	0
0.00194444	0.00398148	0.00314815	0	0		0.00319444	0.00587963	0	0	0		0.00560185	0.0675	0.0232407	0.000833333	0
0.135046	0.00791667	0	0.000833333	0		0.0154167	0.00824074	0.00634259	0	0		0.0258796	0	0	0	0
0.0128704	0.0718981	0.00185185	0.00134259	1		0.019537	0.032963	0.00212963	4.62963e-05	0		0	0	0	0	0
0.00972222	0	0	0	1		0.00166667	0.103148	0.0784722	0.00347222	0		0.0123611	0.00912037	0.000740741	0	1
0.00759259	0.00805556	0.00731481	0	0		0.0543519	0.0137037	0.00638889	0	0		0.0631481	0.0202778	0.0118981	0.000694444	0
0.00212963	0.121574	0.0362037	0.00527778	0		0	0	0	0	0		0.0102778	0.00736111	0	0	0
0.0331944	0.0114815	0.0364815	0	0		0.0198148	0.0665278	0.0155093	0.0140741	0		0.0248148	0.0361574	0.00449074	0.00189815	0
0.0362963	0	0	0	0		0	0.00106481	0.00606481	0	0		0.0972222	0.000231481	0	0	0
0.010787	0.0676389	0.00680556	0.00277778	0		0.0177778	0.0645833	0.030787	0.000694444	1		0.0157407	0.0885648	0.0175926	0.00712963	0
0.0356019	0.000277778	0	0	0		0.00865741	0.0205093	0.000416667	0.000185185	0		0.0460185	0.0333333	0.025787	0	0
0.0323148	0.014537	0.00430556	0	0		0.00430556	0.010787	0.00722222	0	0		0.00342593	0.105556	0.0591667	0.00319444	1
0.00615741	0.0650926	0.0443519	0.000925926	1		0.0104167	0.0553241	0.0407407	0.00157407	0		0.00240741	0.029213	0.0305556	0	1
0.00189815	0	0	0	0		0.0399537	0.00537037	0.000231481	0	0		0.0212037	0.0330556	0.00740741	0.00296296	0
0.000648148	0.00976852	0.000833333	0	1		0.0166667	0.0396759	0.000277778	0.00402778	0		0.114722	0	0.0105093	0	0
0.000694444	0.0846759	0.0285648	0	1		0.0400463	0.00282407	0.00347222	0	0		0.0126852	0.0190741	0.0099537	0	0
0.0660185	0.0193981	0	0	0		0.029213	0.00986111	0.000972222	0	0		0.0485185	0.0376389	0.00638889	0.000509259	0
0.000972222	0.00291667	0.0366667	0	0		0.0336111	0.0341204	0.00277778	0	0		0.0118519	0.0138889	0.0025	0	0
0.000740741	0	0	0	1		0	0.144954	0.0602315	0.00657407	0		0.00175926	0.0203704	0	0.00324074	0
0.0725	0.0247685	0.00115741	0.00236111	0		0.00717593	0.00439815	0.00328704	0	0		0.0537963	0.00837963	0.00157407	0.0012963	0
0.00967593	0.043287	0.00273148	0.000925926	0		0.0297685	0.0174537	0.0012963	0	0		0.0380093	0.0131944	0.0246759	0	0
0	0	0	0.00115741	0		0.0102315	0.115972	0.0288889	4.62963e-05	0		0.0907407	0.01125	0.0113889	0.000324074	1
0.0275926	0.0109722	0	0.0025	0		0.00342593	0.00453704	0.000555556	0	0		0.0709259	0.0132407	0	0.00106481	0
0.00865741	0	0	0	1		0.01125	0.055	0.00351852	0.000833333	0		0.0525926	0.0437963	0.0245833	0.00333333	0
0.0888426	0.00111111	0	0	0		0.0316667	0.0298148	0.00634259	4.62963e-05	0		0	0	0	0	0
0.0188889	0.0124074	0.00819444	0	0		0.00837963	0.0592593	0.0113426	0.000462963	0		0.0300926	0.0495833	0.0301389	0.00180556	0
0.00458333	0.0134722	0.00388889	0.00152778	1		0.00333333	0.049213	0.00462963	0.000185185	0		0.012037	0.0881019	0.0331019	0.0144907	0
0.0189352	0.0972685	0.0741667	0	0		0.000231481	0.0165741	0.00287037	0	0		0.0111111	0	0.000324074	0	0
0.000231481	0	0	0.000694444	0		0.0131944	0.0117593	0.000601852	0.000138889	0		0.129028	0.0037963	0	0	0
0.0277315	0.0835185	0.0638426	0.000601852	1		0.00523148	0.0843056	0.0110648	0.00185185	0		0.010787	0.0741204	0.0157407	0.00203704	0
0.124398	0.000601852	0	0.00398148	1		0.0588426	0.000833333	0.00768519	0	0		0	0	0	0	1
0.027037	0.0112037	0.00148148	0.000185185	0		0.0629167	0.018287	0.00226852	0	0		0.000601852	0.00694444	0.00111111	0.00324074	0
0.00763889	0.00449074	0.000324074	0.000555556	0		0.00148148	0	0.00300926	0	0		0.0187963	0.0109722	0.0115741	0.000925926	0
0.00675926	0.0162037	0.000833333	0.00101852	0		0.00240741	0.000231481	0	0	0		0.00587963	0.0817593	0.0174074	0	0
0.0025463	0.0889352	0.0225	0.00324074	1		0.0231944	0.108056	0.0169444	0.00439815	0		0.00537037	0.112917	0.0360648	0.00268519	0
0.0164815	0.0746296	0.00810185	0.00300926	1		0.0106481	0.122407	0.0944444	0.00134259	1		0.0465741	0.00601852	0.000324074	0.000324074	1
0.00087963	0.0495833	0.00638889	0.00171296	0		0	0	0	0	0		0.00782407	0.104074	0.0154167	0.000833333	0
0.0102315	0.0430093	0.00393519	0.00115741	1		0.00634259	0.0967593	0.0199074	0.00958333	0		0.0330556	0.045787	0.00319444	0.0062963	1
0.00375	0.117963	0.0276852	0.00856481	1		0.00439815	0.0200926	0.00194444	0.000601852	1		0.0146296	0.106296	0.0459722	0.0062037	1
0.0175463	0.101204	0.0306481	9.25926e-05	1		0.00930556	0.0602315	0.00875	0.00171296	0		0.02875	0.0686111	0.0828241	0.000925926	1
0.0134259	0.0347685	0	0.00333333	0		0.0108333	0.00259259	0	0	1		0.00592593	0.115972	0.0665278	0.000833333	0
0.00481481	0.143611	0.0471759	0.000787037	1		0.000277778	0.135231	0.0735185	0.00291667	1		0.011713	0.0569907	0.0151389	0.00166667	0
0	0	0	0	0		0.0148611	0.0178241	0.00893519	0.00185185	1		0	0	0	0	1
0.00782407	0.042037	0.00601852	0.00240741	0		0.014537	0.0751389	0.0318519	0.0050463	1		0.00532407	0.0158796	0.0211111	0	0
0.000231481	0.0130093	0.000231481	0.00175926	0		0.0235185	0.0268981	0.00115741	0.00407407	1		0.0137037	0.0406481	0.00625	0.00342593	0
0.0049537	0.026713	0.000416667	9.25926e-05	0		0.0074537	0.112731	0.00865741	0.00194444	0		0.0105093	0.0966204	0.0256944	0.00125	0
0	0	0	0.00222222	1		0.00550926	0.119907	0.0166204	0.00532407	1		0.00782407	0.114722	0.0528241	0.00412037	0
0.0263889	0.00523148	0	0	0		0.0087037	0.00597222	0.00523148	0	1		0.0248148	0.0121759	0.00037037	0	0
0.0037037	0.109537	0.0284259	0.00087963	0		0.0477315	0.00805556	0.00037037	0	1		0.00958333	0.109028	0.050787	0.00287037	0
0.0024537	0.0147222	0.00268519	0.00324074	0		0.00671296	0	0	0	0		0.00282407	0.0892593	0.0299074	0.00564815	0
0.0278704	0.0533796	0.0148148	9.25926e-05	1		0	0	0	0	0		0.0469444	0.0290741	0.00273148	0.00115741	0
0.000555556	0.032963	0.0337037	0.000601852	1		0.0980556	0.0148611	0	0.000648148	1		0.00625	0.0439352	0.0115741	0.00347222	0
0.0605093	0.0169444	0.00305556	0	0		0.00277778	0	0.00569444	0	0		0.0376852	0.00240741	0.0012963	0	1
0.00296296	0.0440278	0.00518519	0.00217593	1		0.0559259	0.0410648	0	0.00365741	0		0.00125	0	0.00087963	0	1
0.00300926	0.0768981	0.0191667	0.000555556	1		0.00925926	0.129259	0.0825463	0	1		0.00106481	0.118796	0.0213889	0.0101852	0
0	0.13838	0.0593056	0.00115741	0		0.027963	0.0521759	0.01125	0	0		0.00773148	0.0623148	0.0150463	0	0
0	0	0	0	0		0.0379167	0.0775	0.0453241	0	0		0.00430556	0.0917593	0.00287037	0.00625	0
0.0403241	0	0	0.00277778	0		0.00296296	0.0918519	0.0273148	0.0075	0		0.00430556	0.123889	0.0445833	0.00203704	0
0	0	0	0	0		0.0540741	0.0471759	0.0144444	0.000416667	0		0.0188889	0.00263889	0.00125	0	0
0.0727778	0.0333333	0.00300926	0	0		0.00384259	0.00902778	0.0144907	0	0		0.0368981	0.035	0.0174074	0.000277778	0
0.0150463	0.0368981	0.0134259	0.00208333	1		0	0	0	0	1		0.00407407	0.00694444	0.00402778	0.00277778	0
0.028287	0.0533796	0.00375	9.25926e-05	0		0.00527778	0.07125	0.00759259	0.0012037	0		0.014213	0.0627315	0.0215741	0.00449074	0
0.0134722	0.00527778	0.00777778	0	0		0.0121759	0.0753704	0.0126389	0.00435185	0		0.00893519	0.0631019	0.00782407	0.00444444	0
0.0188426	0.0536111	0.0099537	0.000972222	1		0.00560185	0.0573148	0.0138426	0.00217593	1		0.00805556	0.0432407	0.00462963	0	0
0.000925926	0.0675926	0.0887963	0	1		0.00851852	0.0508333	0.00564815	0.00087963	0		0.00231481	0.135417	0.075787	0.000277778	1
0.00944444	0.103241	0.0388426	0	1		0.0100926	0.118287	0.100324	0.00231481	1		0	0	0	0	1
0.00333333	0.0200463	0	0.00037037	0		0.00740741	0.0538889	0.0198611	0.00148148	1		0.027037	0.0771296	0.0526852	0.00824074	0
0.0104167	0.0808333	0.0259722	0	1		0.0127315	0.125139	0.0187963	0.00217593	0		0	0	0	0	0
0.00787037	0.0929167	0.0608333	0.00351852	1		0.00990741	0.118148	0.0296296	0.00412037	0		0.0136574	0.0507407	0.00888889	0.00328704	1
0	0.000416667	0	0.000601852	1		0.022963	0.0112037	0.00101852	0	0		0.0115741	0.030787	0	0	0
0.00412037	0.0324537	0.0119907	0.00157407	0		0.0104167	0.0825	0.0012037	0.0025463	0		0.00134259	0.10338	0.0346759	0.00277778	0
0.0235648	0.0196296	0.000694444	0.00481481	0		0.000416667	0	0	0	0		0.000277778	0.00342593	0	0	1
0	0	0	0	1		0	0	0	0	1		0.0214815	0.079537	0.00430556	0.00157407	0
0.0971296	0	0	0	0		0.0731944	0.0237963	0.000324074	0	0		0.0193056	0.00981481	0.00685185	0	0
0	0.0744907	0.0346296	0	0		0.0706944	0.000740741	0	0	0		0.00342593	0.044537	0	0.00203704	0
0.0252315	0.0201852	0.00458333	0	0		0.0200926	0.0505556	0.00152778	0.00439815	0		0.0196296	0.0774074	0.0443519	0.000509259	0
0.00916667	0.0945833	0.0165741	0.00217593	0		0.0158333	0.110694	0.0244444	0.00162037	0		0.0116667	0.0834259	0.0195833	0.00185185	0
0.00476852	0.0330093	0.00240741	0.00407407	1		0.00777778	0.043287	0.00347222	0.0062037	0		0.0226852	0.000972222	0	0	0
0.000648148	0.0339815	0.00115741	0.0012963	0		0.0119444	0.0671296	0.0136111	0.0025	0		0.01875	0.0421296	0.00296296	0.00208333	0
0.0106481	0.0170833	0.00699074	0.000648148	0		0	0	0.000648148	0	0		0	0	0	0.00037037	0
0.00259259	0.0695833	0.0104167	0.00763889	1		0	0	0	0	0		0.000416667	0.0818519	0.0114352	0.00194444	0
0.00226852	0.125972	0.0275926	0.00712963	1		0.0182407	0.0334259	0.00421296	0.00212963	0		0.000972222	0.0595833	0.0133796	0.00578704	0
0.0193519	0	0	0	0		0.00944444	0.109398	0.0586574	0.005	0		0.00328704	0.000601852	0.00240741	0	1
0.0216667	0.0651389	0.0037037	0.000972222	0		0.0155093	0.0575926	0.022963	0.0012963	0		0	0	0.000740741	0	0
0.0171759	0.00236111	0.00425926	0.00106481	1		0.0946296	0.00814815	0.00939815	0.00125	0		0.00722222	0.00430556	0.000324074	0.00199074	0
0.00291667	0.064537	0.0302315	0.00115741	1		0.0153241	0.0177778	0.0144907	0.00152778	0		0.0152315	0.0816667	0.00699074	0.000972222	1
0.0413889	0.0200926	0.00171296	0.000185185	0		0.00412037	0.0718981	0.0176852	0.00555556	1		0.00416667	0.0318056	0.00310185	0.00578704	0
0.0106944	0.0173611	0.000555556	0.00138889	0		0	0	0	0	0		0.02125	0.0568981	0.000648148	0.00287037	0
0.00430556	0.117778	0.0994907	0	1		0.0271759	0.0677315	0.029537	0.00648148	0		0.0174537	0.0568519	0.00444444	0.00532407	0
0.0364352	0.0211574	0.000601852	0	0		0.0118519	0.103519	0.0219907	0.000925926	0		0.00657407	0	0.0025463	0	0
0.00439815	0.0135185	0.0012037	0.0037963	1		0.00925926	0.122315	0.06625	0.0025463	1		0.010787	0.0521759	0.0168056	0.00111111	0
0.0197685	0.0582407	0.0074537	0.00518519	0		0.00240741	0	0.000277778	0	0		0.000462963	0.00685185	0.000277778	0	0
0.0176852	0.0102315	0.0075463	0	0		0	0.000972222	0.000740741	0.00592593	0		0.0116204	0.0490278	0.00486111	0	0
0.00416667	0.0525926	0.0188889	0.0131019	1		0	0.000277778	0	0	1		0	0	0	0	0
0.0470833	0.00847222	0.0231944	0	1		0.02625	0.0843519	0.0662963	0.00152778	0		0.0176852	0	0	0	1
0.0075	0.0656019	0.0198611	0.00236111	0		0.137454	0.0122222	0.00726852	0	0		0.00175926	0.137269	0.053287	0.000231481	1
0.0175	0	0	0	1		0.01125	0.0614352	0.0223611	0.00388889	1		0.0184259	0.00162037	0	0	0
0.0161574	0.107315	0.0183796	0.00226852	0		0.0184259	0.0856481	0.0356944	0.0025	0		0.0469907	0.000231481	0	0.000648148	0
0.00305556	0.0114815	0	0	0		0.00865741	0.0211574	0.000648148	0.0012037	1		0.00888889	0.0281944	0.0111574	0.000925926	0
0.0406481	0.0200926	0.00703704	0.00222222	0		0.0140741	0.0447222	0	0.014213	1		0.00814815	0.00546296	0	0.000231481	1
0.0194907	0.0849537	0.0122685	0.000138889	1		0.00921296	0.000694444	0	0.000787037	0		0.00726852	0.0664352	0.00462963	0.00324074	0
0	0	0	0	0		0.000601852	0.00180556	0	0.00212963	0
0.00703704	0.0813889	0.00601852	0.00773148	0		0.00115741	0.132454	0.03875	0.00967593	0

[truncated: 2 more sheets: Figure 4 FS1C, StatisticalTests]
